# Supplementary material for: Selective MicroRNA-Offset RNA Expression in Human Embryonic Stem Cells
Source: PLoS One. 2015 Mar 30;10(3):e0116668. doi: 10.1371/journal.pone.0116668 (PMC4378994; doi:10.1371/journal.pone.0116668)
Supplement: S1 Table — (XLSX) [file pone.0116668.s001.xlsx]

## Sheet: workflow_and_counts
Annotation of known small RNAs
Workflow and number of reads classified to each category
	HS401		HS181		Fibroblast
	#reads	%	#reads	%	#reads	%
original data	10496434		11110840		11400025
removed in preprocessing	4354970	0.4149	2734884	0.246146	2094117	0.183694
cleaned data sets, min length 14 nt	6141464	1	8375956	1	9305908	1
tRNA mapping reads	455450	0.0741598	749281	0.0894562	150774	0.016202
UCSC hg19: 625 tRNAs
tRNA removed	5686014		7626675		9155134
moRNA mapping reads (2mm)	5106	0.000831398	6275	0.000749168	1024	0.000110038
moR-5p	3145		3469		983
moR-3p	1961		2806		41
mir hairpin mapping reads	2219469	0.361391	3577247	0.427085	6588747	0.708018
miR	1955724		3091452		5998375
miR*	199301		400288		503381
loop	4183		4636		2559
miRBAse v 17: 1424 hairpins
2mm, best stratum
mir hairpin removed	3466545		4049428		2566387
piRNA mapping reads (0 mm)	53459	0.0087046	66043	0.00788483	24293	0.00261049
piRNAbank + genbank: 32112 piR
piRNA removed	3413086		3983385		2542094
snRNA mapping reads (0 mm)	44299	0.0072131	61908	0.00739116	2513	0.000270044
ensembl: 1951 snRNAs
snRNA removed	3368787		3921477		2539581
snoRNA mapping reads (0 mm)	287013	0.0467336	294786	0.0351943	61430	0.00660118
ensembl: 1523 snoRNAs
snoRNA removed	3081774		3626691		2478151
rRNA mapping reads (0 mm)	39308	0.00640043	46542	0.00555662	41360	0.00444449
ensembl: 537 rRNAs
rRNA removed	3042466		3580149		2436791
Mt_tRNA mapping reads (0 mm)	28804	0.00469009	47546	0.00567649	54200	0.00582426
ensembl, 22 Mt_tRNAs
Mt_tRNA removed	3013662		3532603		2382591
misc_RNA mapping reads (0 mm)	129079	0.0210176	212772	0.0254027	46509	0.00499779
ensembl: 1190 RNAs
misc_RNA removed	2884583		3319831		2336082
repeats (0 mm)	4131	0.000672641	4528	0.000540595	690	7.41464e-05
repbase sep 2011: 1034 repeats
repeats removed	2880452		3315303		2335392
hg19 mapping reads	5318515	0.866001	7247306	0.865251	8487163	0.912019
2mm best stratum max 10 places
reads not mapped	822949	0.133999	1128650	0.134749	818745	0.0879812
