# Supplementary material for: Selective MicroRNA-Offset RNA Expression in Human Embryonic Stem Cells
Source: PLoS One. 2015 Mar 30;10(3):e0116668. doi: 10.1371/journal.pone.0116668 (PMC4378994; doi:10.1371/journal.pone.0116668)
Supplement: S3 Table — (XLSX) [file pone.0116668.s003.xlsx]

## Sheet: moRNAs
The moRNA reference sequences and their counts in our data and in Morin et al. 2008 and Bar et al. 2008 datasets
moRNA reference sequence is the most highly expressed read 0mm to genome
									Morin moRNAs					Bar moRNAs
							0mm		32 same max isomoR					4 same max isomoR
mir hp	moR name	moR sequence	Length	HS401	HS181	HFF-1	total	both 3p and 5p moR	max isomoR	length	day0	day15	total	max isomoR	length	undiff	diff	total
hsa-mir-367	hsa-moR-367-3p	TGGATTGTTAAGCCAATGACAGAA	24	819	1283	1	2103	yes	TGGATTGTTAAGCCAATGACAGAA	24	45	5	50	-	-	-	-	-
hsa-mir-421	hsa-moR-421-5p	ATCCGGTGCACATTGTAGGC	20	112	141	2	255	yes	ATCCGGTGCACATTGTA	17	5	0	5	-	-	-	-	-
hsa-mir-367	hsa-moR-367-5p	CTTGGCTACAGGCCAT	16	58	195	0	253	yes	CTTGGCTACAGGCCATT	17	6	8	14	-	-	-	-	-
hsa-mir-103a-2	hsa-moR-103a-2-3p	AAGAACCAAGAATGGGCTGC	20	102	144	5	251	yes	AAGAACCAAGAATGGGCTGC	20	34	36	70	-	-	-	-	-
hsa-mir-21	hsa-moR-21-5p	TGTACCACCTTGTCGGG	17	102	75	65	242	yes	CTGTACCACCTTGTCGGG	18	9	5	14	TGTACCACCTTGTCGGG	17	0	15	15
hsa-mir-92a-1	hsa-moR-92a-1-3p	TGAGTTTGGTGGGGATTGTGACCAGAAGA	29	66	122	1	189	yes	-	-	-	-	-	-	-	-	-	-
hsa-mir-302a	hsa-moR-302a-5p	CAAGACTGGGCTCCCCACC	19	62	92	0	154	yes	CAAGACTGGGCTCCCCACC	19	73	0	73	CCAAGACTGGGCTCCCCACCA	21	15	0	15
hsa-mir-363	hsa-moR-363-5p	ATGATCTGTTTTGCTGTTG	19	59	72	1	132	yes	ATGATCTGTTTTGCTGTTGT	20	11	13	24	TGATCTGTTTTGCTGTTGT	19	1	0	1
hsa-mir-517a	hsa-moR-517a-5p	GAAGATCTCAGGCAGTGAC	19	52	60	0	112	yes	AGAAGATCTCAGGCAGTG	18	5	4	9	-	-	-	-	-
hsa-mir-517c	hsa-moR-517c-5p	GAAGATCTCAGGCAGTGAC	19	52	60	0	112	yes	-	-	-	-	-	-	-	-	-	-
hsa-mir-296	hsa-moR-296-5p	AGGAGAAAGGACCCTTCCA	19	43	66	2	111	yes	-	-	-	-	-	-	-	-	-	-
hsa-mir-33a	hsa-moR-33a-5p	CCTGGCGGGCAGCTGTG	17	39	33	17	89	yes	TCCTGGCGGGCAGCTGTG	18	33	11	44	TCCTGGCGGGCAGCTGTG	18	0	1	1
hsa-mir-20a	hsa-moR-20a-5p	ATGTGACAGCTTCTGTAGCAC	21	39	49	0	88	yes	ATGTGACAGCTTCTGTAGCAC	21	2	4	6	-	-	-	-	-
hsa-mir-1283-2	hsa-moR-1283-2-5p	AGAAGATCTCAAGCTGTGA	19	28	41	0	69	yes	AGAAGATCTCAAGCTGTGA	19	75	20	95	-	-	-	-	-
hsa-mir-525	hsa-moR-525-5p	AGAAGATCTCAAGCTGTGA	19	28	41	0	69	yes	AGAAGATCTCAAGCTGTGA	19	75	20	95	-	-	-	-	-
hsa-mir-518a-1	hsa-moR-518a-1-5p	AGAAGATCTCAAGCTGTGA	19	28	41	0	69	no	AGAAGATCTCAAGCTGTGA	19	75	20	5	-	-	-	-	-
hsa-mir-520d	hsa-moR-520d-5p	AGAAGATCTCAAGCTGTGA	19	28	41	0	69	yes	AGAAGATCTCAAGCTGTGA	18	3	2	5	-	-	-	-	-
hsa-mir-527	hsa-moR-527-5p	AGAAGATCTCAAGCTGTGA	19	28	41	0	69	yes	AGAAGATCTCAAGCTGTGA	18	3	2	5	-	-	-	-	-
hsa-let-7f-2	hsa-let-7f-2-5p	ACACTGGTGCTCTGTGGGA	19	28	34	3	65	yes	ACACTGGTGCTCTGTGGGA	19	26	11	37	GGACACTGGTGCTCTGTGGGA	21	2	1	3
hsa-mir-17	hsa-moR-17-5p	TGACCAGTCAGAATAATG	18	40	23	0	63	yes	TGTGACCAGTCAGAATAATG	20	0	2	2	-	-	-	-	-
hsa-mir-625	hsa-moR-625-5p	TGGTAAGGGTAGAGGGATG	19	28	29	1	58	no	-	-	-	-	-	-	-	-	-	-
hsa-mir-103a-2	hsa-moR-103a-2-5p	CTGCGTCTTTGTGCTT	16	27	19	11	57	yes	GCTGCGTCTTTGTGCTTTC	19	10	3	13	GCTGCGTCTTTGTGCTTTC	19	2	5	7
hsa-mir-125a	hsa-moR-125a-5p	ATGTTGCCAGTCTCTAGG	18	24	23	9	56	yes	ATGTTGCCAGTCTCTA	16	1	0	1	-	-	-	-	-
hsa-mir-515-1	hsa-moR-515-1-5p	AGAAGATCTCATGCAGTCA	19	39	16	0	55	yes	GAGAAGATCTCATGCAGTC	19	1	0	1	-	-	-	-	-
hsa-mir-515-2	hsa-moR-515-2-5p	AGAAGATCTCATGCAGTCA	19	39	16	0	55	yes	GAGAAGATCTCATGCAGTC	19	1	0	1	-	-	-	-	-
hsa-mir-519e	hsa-moR-519e-5p	AGAAGATCTCATGCAGTCA	19	39	16	0	55	yes	GAGAAGATCTCATGCAGTC	19	1	0	1	-	-	-	-	-
hsa-mir-302b	hsa-moR-302b-5p	TGTTGGGTGGGCTCCCTTCA	20	22	26	0	48	yes	TTGGGTGGGCTCCCTTCA	18	20	5	25	TGTTGGGTGGGCTCCCTTCA	20	24	0	24
hsa-mir-370	hsa-moR-370-5p	GGGGCACAAGACAGAGAAGC	20	8	9	30	47	no	GGGGCACAAGACAGAGAAGC	20	1	1	2	-	-	-	-	-
hsa-mir-4521	hsa-moR-4521-5p	GTGGGTTCGAATCCCATCCTCGTCGG	26	18	19	9	46	no	GTGGGTTCGAATCCCATCCTCGTCGG	26	54	36	90	TGCACGCGTGGGTTCGAATCCCAT	24	1	0	1
hsa-mir-16-2	hsa-moR-16-2-3p	GTGTGACAGGGATACAGCAAC	21	15	21	0	36	yes	GTGTGACAGGGATACAGCAA	20	3	0	3	-	-	-	-	-
hsa-mir-128-1	hsa-moR-128-1-5p	GTTCCTGAGCTGTTGGAT	18	9	21	1	31	no	TGTTCCTGAGCTGTTGG	17	0	1	1	-	-	-	-	-
hsa-mir-516a-2	hsa-moR-516a-2-5p	AGAAGATCTCAGGTTGTGACC	21	16	13	0	29	yes	AGAAGATCTCAGGTTGTG	18	1	2	3	-	-	-	-	-
hsa-mir-519a-2	hsa-moR-519a-2-5p	AGAAGATCTCAGGCTGTG	18	8	21	0	29	yes	AGAAGATCTCAGGCTGTG	18	10	2	12	-	-	-	-	-
hsa-mir-522	hsa-moR-522-5p	AGAAGATCTCAGGCTGTG	18	8	21	0	29	no	AGAAGATCTCAGGCTGTG	18	10	2	12	-	-	-	-	-
hsa-mir-520a	hsa-moR-520a-5p	AGAAGATCTCAGGCTGTG	18	8	21	0	29	yes	AGAAGATCTCAGGCTGTG	18	10	2	12	-	-	-	-	-
hsa-mir-521-1	hsa-moR-521-1-5p	AGAAGATCTCAGGCTGTG	18	8	21	0	29	no	AGAAGATCTCAGGCTGTG	18	10	2	12	-	-	-	-	-
hsa-mir-197	hsa-moR-197-5p	GGAATCTGTGCTCTGGGGGCTGTGC	25	11	14	3	28	no	GAATCTGTGCTCTGGGGGCTGTGC	24	6	5	11	CTGTGCTCTGGGGGCTGTG	19	0	1	1
hsa-mir-876	hsa-moR-876-5p	ACAAACTGTGAAGTGCTGTG	20	9	19	0	28	no	ACACAAACTGTGAAGTGCTG	20	4	0	4	-	-	-	-	-
hsa-mir-221	hsa-moR-221-5p	TGAACATCCAGGTCTGGGGCATGA	24	18	8	2	28	yes	-
hsa-mir-221	hsa-moR-221-3p	AGGCTACCTGGAAACATGTTCTCC	24	10	15	0	25	yes	-
hsa-mir-21	hsa-moR-21-3p	TGACATTTTGGTATCTTTCA	20	13	12	0	25	yes	GACATTTTGGTATCTTTCATCTGAC	25	1	0	1	-	-	-	-	-
hsa-mir-18a	hsa-moR-18a-5p	ATGTTGAGTGCTTTTTGT	18	8	17	0	25	yes	ATGTTGAGTGCTTTTTGTTC	20	2	1	3	-	-	-	-	-
hsa-mir-302d	hsa-moR-302d-5p	ATCTGTTAAGGGGCCCCCTC	20	10	11	0	21	yes	CTGTTAAGGGGCCCCCTCT	19	7	0	7	TGTTAAGGGGCCCCCTCT	18	1	0	1
hsa-mir-324	hsa-moR-324-5p	CTGAGCTGACTATGCCTCCC	17	14	5	1	20	yes	TTCGCAGAAGCTGAGCTGACT	21	0	1	1	-	-	-	-	-
hsa-mir-103a-1	hsa-moR-103a-1-3p	AGGCATTGAGACCTGTTCT	19	9	10	1	20	yes	AGGCATTGAGACCTGTTCTT	20	3	0	3	-	-	-	-	-
hsa-mir-20b	hsa-moR-20b-3p	ACTCTTGGATAACAAA	16	7	13	0	20	yes	ACTCTTGGATAACAAA	16	2	0	2	-	-	-	-	-
hsa-mir-519a-1	hsa-moR-519a-1-5p	AGAAGACCTCAGGCTGTGAC	20	14	6	0	20	yes	GAAGACCTCAGGCTGTG	17	3	0	3	-	-	-	-	-
hsa-mir-524	hsa-moR-524-5p	AGAAGATCTCATGCTGTGACC	21	11	9	0	20	yes	AGAAGATCTCATGCTGTG	18	3	0	3	-	-	-	-	-
hsa-mir-518f	hsa-moR-518f-5p	AGAAGATCTCATGCTGTGACC	21	11	9	0	20	yes	AGAAGATCTCATGCTGTG	18	3	0	3	-	-	-	-	-
hsa-mir-106b	hsa-moR-106b-5p	CGCTCCAGCCCTGCCGGGGC	20	8	10	0	18	yes	-	-	-	-	-	-	-	-	-	-
hsa-mir-542	hsa-moR-542-5p	ATGCACAGATCTCAGACA	18	6	9	3	18	no	-	-	-	-	-	-	-	-	-	-
hsa-mir-526b	hsa-moR-526b-5p	AGAAGATGTCAGGCTGTG	18	8	8	0	16	yes	AGAAGATGTCAGGCTGT	17	2	0	2	-	-	-	-	-
hsa-mir-520b	hsa-moR-520b-5p	AGAAGATGTCAGGCTGTG	18	8	8	0	16	no	AGAAGATGTCAGGCTGTGTC	20	6	6	12	-	-	-	-	-
hsa-mir-191	hsa-moR-191-5p	GCCAACGGCTGGACAGCGGG	20	3	10	2	15	no	-	-	-	-	-	-	-	-	-	-
hsa-mir-16-1	hsa-moR-16-1-5p	AGCAATGTCAGCAGTGCC	18	6	9	0	15	yes	-	-	-	-	-	-	-	-	-	-
hsa-mir-214	hsa-moR-214-5p	AGAGTTGTCATGTGTC	16	1	4	10	15	yes	-
hsa-mir-27a	hsa-moR-27a-5p	CTGTGCCTGGCCTGAGGAGC	20	1	2	10	13	no	TGTGCCTGGCCTGAGGAGC	19	1	0	1	-	-	-	-	-
hsa-mir-1323	hsa-moR-1323-5p	TGACATTCAGACTGAGGTCC	20	6	7	0	13	no	TGACATTCAGACTGAGGTCC	20	2	3	5	-	-	-	-	-
hsa-mir-92a-2	hsa-moR-92a-2-5p	ACTCATGCCCATTCATCCC	19	3	10	0	13	yes	CTCATGCCCATTCATCCCT	19	0	1	1	-	-	-	-	-
hsa-mir-1301	hsa-moR-1301-5p	CCTAGAATGGGGATTGTGGG	20	6	7	0	13	no	CCTAGAATGGGGATTGTGGG	20	5	1	6	-	-	-	-	-
hsa-mir-130a	hsa-moR-130a-5p	TGCCTCTGCTGCTGGCCAGA	20	7	6	0	13	yes	-	-	-	-	-	-	-	-	-	-
hsa-mir-30b	hsa-moR-30b-3p	AGCTGACTTGGAATGTCAACCAA	23	5	8	0	13	yes	-	-	-	-	-	-	-	-	-	-
hsa-mir-708	hsa-moR-708-5p	GAAATGGTAACTGCCC	16	7	3	2	12	no	GTGAAATGGTAACTGCCCTC	20	2	0	2	GAAATGGTAACTGCCCTC	18	0	1	1
hsa-mir-302a	hsa-moR-302a-3p	TGGTAAGTCTTCCTTTTACA	20	4	8	0	12	yes	TGATGGTAAGTCTTCCTTTTA	21	1	0	1	-	-	-	-	-
hsa-mir-302b	hsa-moR-302b-3p	GAGTGAATCCAATTTACTTCTCCAAA	26	6	6	0	12	yes	GAGTGAATCCAATTTACTTCTCCAA	25	1	0	1	-	-	-	-	-
hsa-mir-25	hsa-moR-25-5p	CGGGACTGGCCAGTGTTGAG	20	6	4	1	11	yes	CGGGACTGGCCAGTGTT	17	0	1	1	-	-	-	-	-
hsa-mir-744	hsa-moR-744-5p	CACACTGGGTTGGGCAAGG	19	6	5	0	11	yes	CACACTGGGTTGGGCAAGG	19	2	1	3	-	-	-	-	-
hsa-mir-450b	hsa-moR-450b-5p	ATGTAAGATGCAGAATTA	18	8	3	0	11	no	-	-	-	-	-	-	-	-	-	-
hsa-mir-495	hsa-moR-495-5p	CATCTCTGGTACCTGAAAA	19	3	0	8	11	no	-	-	-	-	-	-	-	-	-	-
hsa-mir-652	hsa-moR-652-5p	AATGGCTATGCACTGCA	17	5	6	0	11	no	-	-	-	-	-	-	-	-	-	-
hsa-mir-373	hsa-moR-373-5p	CGAGGAGCTCATACTGGGA	19	6	4	0	10	yes	GAGGAGCTCATACTGGGAT	19	1	5	6	CGAGGAGCTCATACTGGGAT	20	1	0	1
hsa-mir-32	hsa-moR-32-5p	CTGCTTGCTCTGGTGGAGA	19	6	2	2	10	no	TTCTGCTTGCTCTGGTGGAGA	21	1	0	1	-	-	-	-	-
hsa-let-7a-2	hsa-let-7a-2-5p	TGTGACTGCATGCTCCCAGG	20	0	3	7	10	no	TGTGACTGCATGCTCCCAGGT	21	4	0	4	-	-	-	-	-
hsa-mir-135a-2	hsa-moR-135a-2-3p	ATACATTGTGAAAAATCATCAAC	23	4	6	0	10	yes	-	-	-	-	-	-	-	-	-	-
hsa-mir-19b-1	hsa-moR-19b-1-3p	CTGTGGTAGTGAAAAG	16	6	4	0	10	yes	-	-	-	-	-	-	-	-	-	-
hsa-mir-410	hsa-moR-410-5p	CACTCTGGGTACCTGAGAAG	20	1	2	6	9	no	-	-	-	-	-	-	-	-	-	-
hsa-mir-15b	hsa-moR-15b-5p	TTTGAGGCCTTAAAGTACTG	20	4	5	0	9	yes	-	-	-	-	-	-	-	-	-	-
hsa-mir-16-1	hsa-moR-16-1-3p	GTAAGGTTGACCATACTCTA	20	1	7	0	8	yes	GTAAGGTTGACCATACTCTA	20	2	3	5	-	-	-	-	-
hsa-let-7b	hsa-let-7b-5p	CAAGGCCGGGCCTGGCGGGG	20	0	0	8	8	no	-	-	-	-	-	-	-	-	-	-
hsa-mir-877	hsa-moR-877-5p	CTGAGAGGCTAGAGAAG	17	7	1	0	8	no	-	-	-	-	-	-	-	-	-	-
hsa-mir-3687	hsa-moR-3687-3p	TGGCGTGGGTCGACC	15	4	4	0	8	yes	-	-	-	-	-	-	-	-	-	-
hsa-mir-374a	hsa-moR-374a-5p	AAGAAATTTTACATCGGCCA	20	4	3	0	7	no	GAAGAAATTTTACATCGGCC	20	1	0	1	-	-	-	-	-
hsa-mir-92a-1	hsa-moR-92a-1-5p	ACTCAAACCCCTTTCTACAC	20	1	6	0	7	yes	CTCAAACCCCTTTCTACAC	19	4	0	4	-	-	-	-	-
hsa-mir-18a	hsa-moR-18a-3p	ATAAGAAGTTATGTATTCATCCAA	24	4	3	0	7	yes	ATAAGAAGTTATGTATT	17	1	0	1	-	-	-	-	-
hsa-mir-425	hsa-moR-425-5p	CAGAATGGAAAGCGCTTTGG	20	2	4	1	7	no	-	-	-	-	-	-	-	-	-	-
hsa-mir-17	hsa-moR-17-3p	ATTATGGTGACAGCTGCCTCGGGAAGCCAAG	31	3	4	0	7	yes	-	-	-	-	-	-	-	-	-	-
hsa-mir-15a	hsa-moR-15a-3p	AAAATACAAGGATCTGATCTTCTGAAGAAAA	31	4	3	0	7	no	-	-	-	-	-	-	-	-	-	-
hsa-mir-19a	hsa-moR-19a-3p	TGGTGGCCTGCTATTTCCTTCAAA	24	4	3	0	7	no	-	-	-	-	-	-	-	-	-	-
hsa-mir-3676	hsa-moR-3676-5p	GGCGGCGCCGTGGCTTAGTTGG	22	4	2	0	6	yes	GGCGGCGCCGTGGCTTAGTT	20	2	0	2	GGCGGCGCCGTGGCTTAGTTGGT	23	2	0	2
hsa-mir-361	hsa-moR-361-5p	TTCCTGGGATTTGGGAGC	18	2	3	1	6	yes	TTCCTGGGATTTGGGAGC	18	2	0	2	-	-	-	-	-
hsa-mir-302d	hsa-moR-302d-3p	TGGTGGTTCCTACCTAATCAGCAA	24	3	3	0	6	yes	TGGTGGTTCCTACCTAATCAGC	22	1	0	1	-	-	-	-	-
hsa-mir-20b	hsa-moR-20b-5p	ATAAGATTGGGTCCTAGTAGTAC	23	5	1	0	6	yes	ATAAGATTGGGTCCTAGTAGTAC	23	0	3	3	-	-	-	-	-
hsa-mir-9-2	hsa-moR-9-2-3p	AAAACTCCTTCAAGATCGCCGGG	23	4	2	0	6	yes	AAAACTCCTTCAAGATCGCCGGG	23	1	0	1	-	-	-	-	-
hsa-mir-30d	hsa-moR-30d-5p	TTGTTCAGAAAGTCTGTTG	19	5	1	0	6	yes	-	-	-	-	-	-	-	-	-	-
hsa-mir-518b	hsa-moR-518b-5p	ATATGTCATGCTGTGGCC	18	5	1	0	6	yes	-	-	-	-	-	-	-	-	-	-
hsa-mir-1185-1	hsa-moR-1185-1-5p	CACTCTTTGGTACTTGAAG	19	1	1	4	6	no	-	-	-	-	-	-	-	-	-	-
hsa-mir-124-1	hsa-moR-124-1-5p	AGGAGAAAGGCCTCTCTC	18	3	3	0	6	yes	-	-	-	-	-	-	-	-	-	-
hsa-let-7a-1	hsa-let-7a-1-3p	CTAACGTGATAGAAAAGTCTGCATCCAGG	29	3	3	0	6	yes	-	-	-	-	-	-	-	-	-	-
hsa-mir-363	hsa-moR-363-3p	AACCGCAGGACCTTTGTTGGCGACAT	26	3	3	0	6	yes	-	-	-	-	-	-	-	-	-	-
hsa-mir-30a	hsa-moR-30a-5p	TGCTGTTGACAGTGAGCGAC	20	2	0	3	5	no	TGCTGTTGACAGTGAGCGAC	20	0	2	2	-	-	-	-	-
hsa-mir-4690	hsa-moR-4690-5p	ACCTGAGAACACGGCAG	17	0	5	0	5	no	CACCTGAGAACACGGCAG	18	1	0	1	-	-	-	-	-
hsa-mir-196b	hsa-moR-196b-5p	CAGAACTGGTCGGTGAT	17	0	0	5	5	no	-	-	-	-	-	-	-	-	-	-
hsa-mir-125b-1	hsa-moR-125b-1-5p	ATTGTTGCGCTCCTCTCAG	19	0	1	4	5	yes	-	-	-	-	-	-	-	-	-	-
hsa-mir-96	hsa-moR-96-5p	GCCATCTGCTTGGCCGA	17	3	2	0	5	yes	-	-	-	-	-	-	-	-	-	-
hsa-mir-199a-1	hsa-moR-199a-1-3p	GGCTGGGCTTGGGTGAGCGGC	21	0	0	5	5	no	-	-	-	-	-	-	-	-	-	-
hsa-mir-331	hsa-moR-331-3p	CCAACCTAAGCTCGCGCATCATTCCTGGAACA	32	0	5	0	5	no	-	-	-	-	-	-	-	-	-	-
hsa-mir-3648	hsa-moR-3648-5p	CGGGGGACCGGCCGCGAC	18	3	1	0	4	yes	-	-	-	-	-	GGGGACCGGCCGCGAC	16	6	0	6
hsa-mir-101-1	hsa-moR-101-1-5p	GACTGACAGGCTGCCCTGGC	20	2	2	0	4	no	GACTGACAGGCTGCCCTGGCT	21	1	0	1	-	-	-	-	-
hsa-mir-16-2	hsa-moR-16-2-5p	CTGACATACTTGTTCCAC	18	3	1	0	4	yes	CTGACATACTTGTTCCACTC	20	1	0	1	-	-	-	-	-
hsa-mir-93	hsa-moR-93-5p	ACCTCAGTCCTGGGGGC	17	2	2	0	4	no	ACCTCAGTCCTGGGGGCTC	19	1	0	1	-	-	-	-	-
hsa-mir-19b-1	hsa-moR-19b-1-5p	TACTGAACACTGTTCTATGGT	21	3	1	0	4	yes	-	-	-	-	-	-	-	-	-	-
hsa-mir-136	hsa-moR-136-5p	TTGGATGAGCCCTCGGAGG	19	2	0	2	4	no	-	-	-	-	-	-	-	-	-	-
hsa-mir-3065	hsa-moR-3065-5p	AGGCTGGCAGCTGCCCTC	18	1	3	0	4	no	-	-	-	-	-	-	-	-	-	-
hsa-mir-335	hsa-moR-335-5p	ATTTGTTTTGAGCGGGGG	18	0	3	1	4	no	-	-	-	-	-	-	-	-	-	-
hsa-mir-939	hsa-moR-939-5p	CCAGCTGGGTTTTCTGG	17	1	3	0	4	no	-	-	-	-	-	-	-	-	-	-
hsa-mir-19b-2	hsa-moR-19b-2-5p	AGACATTGCTACTTACAAT	19	2	2	0	4	yes	-	-	-	-	-	-	-	-	-	-
hsa-mir-135b	hsa-moR-135b-5p	CCTCCACTCTGCTGTGGCC	19	2	2	0	4	no	-	-	-	-	-	-	-	-	-	-
hsa-mir-515-1	hsa-moR-515-1-3p	ACTGTTTGAGAAAAACCACGTTGAAG	26	2	2	0	4	yes	-	-	-	-	-	-	-	-	-	-
hsa-mir-515-2	hsa-moR-515-2-3p	ACTGTTTGAGAAAAACCACGTTGAAG	26	2	2	0	4	yes	-	-	-	-	-	-	-	-	-	-
hsa-mir-519e	hsa-moR-519e-3p	ACTGTTTGAGAAAAACCACGTTGAAG	26	2	2	0	4	yes	-	-	-	-	-	-	-	-	-	-
hsa-mir-551b	hsa-moR-551b-3p	AGGCTGTGAGAATAACTGCAATTTAGAGGG	30	2	2	0	4	no	-	-	-	-	-	-	-	-	-	-
hsa-mir-326	hsa-moR-326-5p	CATCTGTCTGTTGGGC	16	3	1	0	4	no	-	-	-	-	-	-	-	-	-	-
hsa-mir-518a-2	hsa-moR-518a-2-5p	AGAAGATCTCAAGCTGTG	18	1	3	0	4	yes	AGAAGATCTCAAGCTGTG	18	3	2	5	-	-	-	-	-
hsa-mir-512-2	hsa-moR-512-2-5p	GGTACTTCTCAGTCTGTGGC	20	3	1	0	4	yes	-	-	-	-	-	-	-	-	-	-
hsa-mir-27b	hsa-moR-27b-5p	CGATGACCTCTCTAACAAGGTGC	23	0	3	0	3	yes	-	-	-	-	-	-	-	-	-	-
hsa-mir-301a	hsa-moR-301a-5p	CTTATTACTGCTAACGAA	18	0	3	0	3	yes	-	-	-	-	-	-	-	-	-	-
hsa-mir-134	hsa-moR-134-5p	AGAAGAGATGTTGGTGTCAGCACCGTCCAGGGTG	34	0	0	3	3	no	-	-	-	-	-	-	-	-	-	-
hsa-mir-342	hsa-moR-342-5p	TGAAACTGGGCTCAAGGTGA	20	0	1	2	3	no	-	-	-	-	-	-	-	-	-	-
hsa-mir-4719	hsa-moR-4719-5p	AAGCACAATGATGAC	15	1	2	0	3	no	-	-	-	-	-	-	-	-	-	-
hsa-mir-3613	hsa-moR-3613-5p	AAGATGGTTGGGTTTGGA	18	1	1	1	3	no	-	-	-	-	-	-	-	-	-	-
hsa-mir-20a	hsa-moR-20a-3p	ACTGCTAGCTGTAGAACTCCAGCTTCGGC	29	3	0	0	3	yes	-	-	-	-	-	-	-	-	-	-
hsa-mir-15b	hsa-moR-15b-3p	GAAATTTAAGGAAATTCATTCAAAAC	26	3	0	0	3	yes	-	-	-	-	-	-	-	-	-	-
hsa-mir-222	hsa-moR-222-3p	TGATGGCATCTTCTAGCTTCTGCTTCAG	28	3	0	0	3	no	-	-	-	-	-	-	-	-	-	-
hsa-mir-516a-1	hsa-moR-516a-1-3p	TTACGGTTTGAGAAAAGCAAC	21	1	2	0	3	yes	-	-	-	-	-	-	-	-	-	-
hsa-mir-517b	hsa-moR-517b-3p	TACTGTTTGAGAAAAGCAAC	20	1	2	0	3	no	-	-	-	-	-	-	-	-	-	-
hsa-mir-518c	hsa-moR-518c-3p	TTACGGTTTGAGAAAAGCAAC	21	1	2	0	3	no	-	-	-	-	-	-	-	-	-	-
hsa-mir-519a-2	hsa-moR-519a-2-3p	TACTGTTTGAGAAAAGCAAC	20	1	2	0	3	yes	-	-	-	-	-	-	-	-	-	-
hsa-mir-520d	hsa-moR-520d-3p	TTACGGTTTGAGAAAAGCAAC	21	1	2	0	3	yes	-	-	-	-	-	-	-	-	-	-
hsa-mir-527	hsa-moR-527-3p	TTACGGTTTGAGAAAAGCAAC	21	1	2	0	3	yes	-	-	-	-	-	-	-	-	-	-
hsa-mir-516a-2	hsa-moR-516a-2-3p	TTACGGTTTGAGAAAAGCAAC	21	1	2	0	3	yes	-	-	-	-	-	-	-	-	-	-
hsa-mir-526b	hsa-moR-526b-3p	TTACTGTCTGAGAAAAGCAAC	21	1	2	0	3	yes	-	-	-	-	-	-	-	-	-	-
hsa-mir-186	hsa-moR-186-3p	AAGTTTGAGCTAAATTCCTTCAACCAAA	28	1	2	0	3	no	-	-	-	-	-	-	-	-	-	-
hsa-mir-19b-2	hsa-moR-19b-2-3p	TTGTGATAATGTGTGCTTCCTACG	24	1	2	0	3	yes	-	-	-	-	-	-	-	-	-	-
hsa-mir-512-1	hsa-moR-512-1-3p	CAATGACTGAGGCGAGCACCG	21	2	1	0	3	yes	-	-	-	-	-	-	-	-	-	-
hsa-mir-512-2	hsa-moR-512-2-3p	CAATGACTGAGGCGAGCACCG	21	2	1	0	3	yes	-	-	-	-	-	-	-	-	-	-
hsa-mir-519a-1	hsa-moR-519a-1-3p	TACTGTTTGAGAAAAGCAAC	20	1	2	0	3	yes	-	-	-	-	-	-	-	-	-	-
hsa-mir-520e	hsa-moR-520e-3p	TACTGTTTGAGAAAAGCAAC	20	1	2	0	3	no	-	-	-	-	-	-	-	-	-	-
hsa-mir-525	hsa-moR-525-3p	TTACGGTTTGGGTAAAGCAACGTTGAA	27	1	2	0	3	yes	-	-	-	-	-	-	-	-	-	-
hsa-mir-135a-2	hsa-moR-135a-2-5p	GATAAATTCACTCTAGTGCT	20	2	1	0	3	yes
hsa-mir-520f	hsa-moR-520f-5p	AGAGGATCTCAGGCTGTGAC	20	3	0	0	3	no	GAGGATCTCAGGCTGTG	17	4	0	4	-	-	-	-	-
hsa-mir-516b-1	hsa-moR-516b-1-5p	AATATCTCAGGCTGTGACC	19	2	1	0	3	yes	-	-	-	-	-	-	-	-	-	-
hsa-mir-302c	hsa-moR-302c-5p	TGAAGGGATCCCCTT	15	1	1	0	2	yes	-	-	-	-	-	TGAAGGGATCCCCTTTGC	18	1	0	1
hsa-mir-503	hsa-moR-503-5p	CCCGCGCTCAGCCGTGCCC	19	2	0	0	2	yes	-	-	-	-	-	GCCCGCGCTCAGCCGTGCCC	20	1	0	1
hsa-mir-4651	hsa-moR-4651-5p	CGGGCTGCCAGCGGTGAGTG	20	2	0	0	2	no	-	-	-	-	-	GCCAGCGGTGAGTGCTA	17	0	1	1
hsa-mir-26b	hsa-moR-26b-5p	CCACCCTGCCCGGGACCCAG	20	0	2	0	2	yes	-	-	-	-	-	CCACCCTGCCCGGGACCCAG	20	2	0	2
hsa-mir-382	hsa-moR-382-5p	TTCTGTGGTACTTGAAGA	18	1	0	1	2	no	TTTTCTGTGGTACTTGAAGA	20	0	1	1	-	-	-	-	-
hsa-mir-744	hsa-moR-744-3p	TTACTCGGTCCTGACCGGCTCGGC	24	2	0	0	2	yes	TTACTCGGTCCTGACCGGCTCGGCTTCT	28	1	0	1	-	-	-	-	-
hsa-mir-31	hsa-moR-31-5p	GTAACTTGGAACTGGAGAGG	20	0	0	2	2	no	GTAACTTGGAACTGGAGAGG	20	1	0	1	-	-	-	-	-
hsa-mir-3676	hsa-moR-3676-3p	ACATTGTGAGGACAGTTGCA	20	1	1	0	2	yes	CATTGTGAGGACAGTTGCA	19	1	0	1	-	-	-	-	-
hsa-let-7a-1	hsa-let-7a-1-5p	ATGTTCTCTTCACTGTGGGA	20	0	2	0	2	yes	ATGTTCTCTTCACTGTGG	18	1	0	1	-	-	-	-	-
hsa-mir-320a	hsa-moR-320a-3p	AGGTGACTGGTCTGGGCTA	19	2	0	0	2	no	ATGAGGTGACTGGTCTGGGCTAC	23	0	1	1	-	-	-	-	-
hsa-mir-103a-1	hsa-moR-103a-1-5p	AAGTTTTCTTACTGCCC	17	2	0	0	2	yes	AGTTTTCTTACTGCCCTC	18	1	0	1	-	-	-	-	-
hsa-mir-148a	hsa-moR-148a-5p	CACGTTTGGTCTTTTGAGGC	20	0	2	0	2	no	ACAGCACGTTTGGTCTTTT	19	0	1	1	-	-	-	-	-
hsa-mir-3687	hsa-moR-3687-5p	CCGTTCGGCGCGCGCGTG	18	2	0	0	2	yes	-	-	-	-	-	-	-	-	-	-
hsa-mir-1295a	hsa-moR-1295a-5p	CCTGAGAAAAGAGGACATT	19	2	0	0	2	no	-	-	-	-	-	-	-	-	-	-
hsa-mir-1298	hsa-moR-1298-5p	AGAGACGAGGAGTTAAGAG	19	2	0	0	2	no	-	-	-	-	-	-	-	-	-	-
hsa-mir-138-2	hsa-moR-138-2-5p	GAGTTCTGGTATCGTTGCTGC	21	2	0	0	2	no	-	-	-	-	-	-	-	-	-	-
hsa-mir-30c-1	hsa-moR-30c-1-5p	CTATAACCATGCTGTAGTGTG	21	2	0	0	2	no	-	-	-	-	-	-	-	-	-	-
hsa-mir-323a	hsa-moR-323a-5p	CTGCTTGGTACTTGGAGAG	19	0	0	2	2	no	-	-	-	-	-	-	-	-	-	-
hsa-mir-340	hsa-moR-340-5p	CCGTTTGTACCTGGTGTGA	19	0	2	0	2	no	-	-	-	-	-	-	-	-	-	-
hsa-mir-3652	hsa-moR-3652-5p	AGTGGGCGGACCGCGC	16	2	0	0	2	no	-	-	-	-	-	-	-	-	-	-
hsa-mir-431	hsa-moR-431-5p	GTCCTGCTTGTCCTGCGAGG	20	0	0	2	2	no	-	-	-	-	-	-	-	-	-	-
hsa-mir-4423	hsa-moR-4423-5p	CCTGACATCATGTACTGCA	19	0	0	2	2	no	-	-	-	-	-	-	-	-	-	-
hsa-mir-543	hsa-moR-543-5p	GACGTGCGGTACTTAATGAG	20	0	1	1	2	no	-	-	-	-	-	-	-	-	-	-
hsa-mir-4426	hsa-moR-4426-5p	AGCAGAGACTGATCTTTG	18	1	1	0	2	no	-	-	-	-	-	-	-	-	-	-
hsa-let-7d	hsa-let-7d-5p	AAAAAATGGGTTCCTAGGA	19	1	1	0	2	no	-	-	-	-	-	-	-	-	-	-
hsa-mir-200c	hsa-moR-200c-5p	CGGGCTGGGCGGGGGCCC	18	1	1	0	2	no	-	-	-	-	-	-	-	-	-	-
hsa-mir-539	hsa-moR-539-5p	TGCTGCTGTTTCATACTTGA	20	1	0	1	2	no	-	-	-	-	-	-	-	-	-	-
hsa-mir-421	hsa-moR-421-3p	CTGCTCTGTGATCTCCATGGGCTCAG	26	1	1	0	2	yes	-	-	-	-	-	-	-	-	-	-
hsa-mir-125a	hsa-moR-125a-3p	TGGCGTCTGGCCCAACC	17	0	2	0	2	yes	-	-	-	-	-	-	-	-	-	-
hsa-mir-324	hsa-moR-324-3p	GGGTTGTAGTCTGACCCGACTGGGAAG	27	2	0	0	2	yes	-	-	-	-	-	-	-	-	-	-
hsa-mir-30d	hsa-moR-30d-3p	TACCGGCTATTCACAGACA	19	2	0	0	2	yes	-	-	-	-	-	-	-	-	-	-
hsa-mir-27b	hsa-moR-27b-3p	ACCTGAAGAGAAGGTGAGATGGGGACAGT	29	0	2	0	2	yes	-	-	-	-	-	-	-	-	-	-
hsa-mir-1283-1	hsa-moR-1283-1-3p	TTACGGTTTGAGAAAAGCAG	20	2	0	0	2	no	-	-	-	-	-	-	-	-	-	-
hsa-mir-1283-2	hsa-moR-1283-2-3p	TTACGGTTTGAGAAAAGCAG	20	2	0	0	2	yes	-	-	-	-	-	-	-	-	-	-
hsa-mir-23a	hsa-moR-23a-3p	CCGACCCTGAGCTCTGCCACCGAGGATGCTG	31	0	0	2	2	no	-	-	-	-	-	-	-	-	-	-
hsa-mir-24-1	hsa-moR-24-1-3p	GAGTCGAGCCCTTGAGCAAAAAGC	24	0	2	0	2	yes	-	-	-	-	-	-	-	-	-	-
hsa-mir-518a-2	hsa-moR-518a-2-3p	TTACGGTTTGAGAAAGCGACGTTGAA	26	2	0	0	2	yes	-	-	-	-	-	-	-	-	-	-
hsa-mir-524	hsa-moR-524-3p	TTACGGTTTGAGAAAAGCAG	20	2	0	0	2	yes	-	-	-	-	-	-	-	-	-	-
hsa-mir-224	hsa-moR-224-3p	AGCCCCAGAGCCAGCATCATCATCAAAGC	29	1	1	0	2	no	-	-	-	-	-	-	-	-	-	-
hsa-mir-516a-1	hsa-moR-516a-1-5p	AAGATCTCAGGCTGTGAC	18	1	1	0	2	yes	-	-	-	-	-	-	-	-	-	-
hsa-mir-24-1	hsa-moR-24-1-5p	CGGGCTGTCGATTGGACCCGCCCTCC	26	1	0	0	1	yes	-	-	-	-	-	TCGATTGGACCCGCCCTCCG	20	0	1	1
hsa-let-7i	hsa-let-7i-5p	CGACACCATGGCCCTGGC	18	0	1	0	1	no	-	-	-	-	-	TCCCCGACACCATGGCCCTGGC	22	0	1	1
hsa-mir-151a	hsa-moR-151a-5p	CTAAAACACTTTTCCTGCCC	20	1	0	0	1	no	CTAAAACACTTTTCCTGCCC	20	1	0	1	CTAAAACACTTTTCCTGCCC	20	1	0	1
hsa-mir-4461	hsa-moR-4461-5p	GTTTTAGCATTGGAGTAGG	19	0	1	0	1	no	TTTAGCATTGGAGTAGG	17	0	1	1	-	-	-	-	-
hsa-mir-632	hsa-moR-632-3p	TTGGGTTGGGAAAGTGAGGGA	21	0	1	0	1	no	TTGGGTTGGGAAAGTGAGGGATT	23	0	1	1	-	-	-	-	-
hsa-mir-372	hsa-moR-372-5p	CAGATGGAGCTGCTCACCCTGTGGG	25	0	1	0	1	no	TGGAGCTGCTCACCCTGTGGG	21	0	1	1	-	-	-	-	-
hsa-mir-296	hsa-moR-296-3p	TGAAGGGCTCTGAAGAGCGC	20	0	1	0	1	yes	TGAAGGGCTCTGAAGAGCGCT	21	1	0	1	-	-	-	-	-
hsa-mir-106b	hsa-moR-106b-3p	TCCAGCAGGGCACGCACAGCGTCCG	25	0	1	0	1	yes	TCCAGCAGGGCACGCACAGCGTCCG	25	0	3	3	-	-	-	-	-
hsa-mir-424	hsa-moR-424-5p	CATTGACTCCGAGGGGATA	19	0	1	0	1	no	TCATTGACTCCGAGGGGATA	20	1	0	1	-	-	-	-	-
hsa-mir-503	hsa-moR-503-3p	GTAAGTCTGGGACTGCCGTTCGGGCC	26	1	0	0	1	yes	GTAAGTCTGGGACTGCCGTTCGGGCCT	27	2	0	2	-	-	-	-	-
hsa-mir-512-1	hsa-moR-512-1-5p	GGGTACTTCTCAGTCTGTGGC	21	0	1	0	1	yes	GGTACTTCTCAGTCTG	16	0	1	1	-	-	-	-	-
hsa-mir-4709	hsa-moR-4709-3p	TAGCAGAAACTGAGCTCCGGGTGGC	25	0	0	1	1	no	GGGTGGCTGGTTCTC	15	1	0	1	-	-	-	-	-
hsa-mir-96	hsa-moR-96-3p	GGGAAAAGCAGGACCCGCAG	20	0	1	0	1	yes	GGGAAAAGCAGGACCCGCAGCT	22	0	1	1	-	-	-	-	-
hsa-mir-4492	hsa-moR-4492-5p	AGGCGGACAGGACTGCAGC	19	0	1	0	1	no	GCGGGAGGCGGACAGGACTGC	21	1	0	1	-	-	-	-	-
hsa-mir-3610	hsa-moR-3610-3p	CGGGAGCTGCTCGGAAGC	18	1	0	0	1	no	GCGGCGGGAGCTGCTCG	17	1	0	1	-	-	-	-	-
hsa-mir-5087	hsa-moR-5087-5p	GCAGGAAGGGCTACTCTTAGT	21	0	1	0	1	no	GCAGGAAGGGCTACTCTTA	19	1	0	1	-	-	-	-	-
hsa-mir-3655	hsa-moR-3655-5p	GCACTGTGGGAAAGAGCT	18	1	0	0	1	no	GCACTGTGGGAAAGAGCTT	19	1	0	1	-	-	-	-	-
hsa-mir-3064	hsa-moR-3064-3p	AGATGTGGAAGATGTGAAATTTG	23	0	0	1	1	no	GATGTGGAAGATGTGAAATTT	21	1	0	1	-	-	-	-	-
hsa-mir-30c-2	hsa-moR-30c-2-5p	GAGAGCACTGAGCGACAGATAC	22	0	0	1	1	no	GAGAGCACTGAGCGACAGATAC	22	0	2	2	-	-	-	-	-
hsa-mir-330	hsa-moR-330-5p	GATCTTTGGCGATCACTGCC	20	0	1	0	1	no	CTGTGTGATCTTTGGCG	17	1	0	1	-	-	-	-	-
hsa-let-7f-1	hsa-let-7f-1-3p	CTGAGGAGTAGACTTGCTGCATTATTTTCTT	31	0	1	0	1	no	CTGAGGAGTAGACTTGCTGCA	21	1	0	1	-	-	-	-	-
hsa-mir-373	hsa-moR-373-3p	CCCTGTTTGAGTAGGGCATCACGAAC	26	1	0	0	1	yes	CCTGTTTGAGTAGGGCAT	18	0	1	1	-	-	-	-	-
hsa-mir-1249	hsa-moR-1249-5p	AGATTATTGTTGGCATGGGG	20	1	0	0	1	no	AGATTATTGTTGGCATGGGG	20	1	0	1	-	-	-	-	-
hsa-mir-523	hsa-moR-523-5p	GGAGCAAGAAGATCTCATGCTGTGACC	27	1	0	0	1	no	AGAAGATCTCATGCTGTG	18	3	0	3	-	-	-	-	-
hsa-mir-520c	hsa-moR-520c-5p	CCAGAGCAAGAAGATCTCAGGCTG	24	1	0	0	1	no	AGAAGATCTCAGGCTGT	17	2	0	2	-	-	-	-	-
hsa-mir-1251	hsa-moR-1251-3p	ACATGGCCTGATAAACAATGGAAC	24	0	1	0	1	no	ACATGGCCTGATAAACAATGGAAC	24	1	0	1	-	-	-	-	-
hsa-mir-100	hsa-moR-100-5p	AGAGAGAAGATATTGAGGCCTGTTG	25	0	0	1	1	no	AAAAGAGAGAAGATATTG	18	1	0	1	-	-	-	-	-
hsa-mir-30b	hsa-moR-30b-5p	CTTTAAACCAAGTTTCAGTTCA	22	0	1	0	1	yes	-	-	-	-	-	-	-	-	-	-
hsa-mir-9-2	hsa-moR-9-2-5p	GTGTGGGAAGCGAGTTGTTA	20	0	1	0	1	yes	-	-	-	-	-	-	-	-	-	-
hsa-mir-193b	hsa-moR-193b-5p	GGAGGCTGTGGTCTCAGAA	19	0	1	0	1	yes	-	-	-	-	-	-	-	-	-	-
hsa-mir-200a	hsa-moR-200a-5p	CCCTCCCGGGCCCCTGTGAG	20	1	0	0	1	yes	-	-	-	-	-	-	-	-	-	-
hsa-mir-362	hsa-moR-362-5p	TGTCTGCTCCCCCTCTTG	18	1	0	0	1	yes	-	-	-	-	-	-	-	-	-	-
hsa-mir-371a	hsa-moR-371a-5p	GCATCCCCTCAGCCTGTGGC	20	1	0	0	1	yes	-	-	-	-	-	-	-	-	-	-
hsa-let-7c	hsa-let-7c-5p	TGGAAGCTGTGTGCATCCGGG	21	1	0	0	1	no	-	-	-	-	-	-	-	-	-	-
hsa-let-7e	hsa-let-7e-5p	ACCTGCCGCGCCCCCCGGGC	20	0	1	0	1	no	-	-	-	-	-	-	-	-	-	-
hsa-mir-107	hsa-moR-107-5p	CGATATTCTCTCTGCTT	17	0	1	0	1	no	-	-	-	-	-	-	-	-	-	-
hsa-mir-1-1	hsa-moR-1-1-5p	GCAGACTGCCTGCTTGGGAA	20	0	1	0	1	no	-	-	-	-	-	-	-	-	-	-
hsa-mir-1227	hsa-moR-1227-5p	AGGCTCTGCGTCGGGCCAG	19	0	1	0	1	no	-	-	-	-	-	-	-	-	-	-
hsa-mir-1228	hsa-moR-1228-5p	AGTGATGAGCGCGACTG	17	1	0	0	1	no	-	-	-	-	-	-	-	-	-	-
hsa-mir-124-2	hsa-moR-124-2-5p	ACTTTCCGGATCAAGATTAGAGGCTCTGCTC	31	0	1	0	1	yes	-	-	-	-	-	-	-	-	-	-
hsa-mir-1244-1	hsa-moR-1244-1-5p	ATGACAACAGAAAAACAA	18	1	0	0	1	no	-	-	-	-	-	-	-	-	-	-
hsa-mir-1244-2	hsa-moR-1244-2-5p	ATGACAACAGAAAAACAA	18	1	0	0	1	no	-	-	-	-	-	-	-	-	-	-
hsa-mir-1277	hsa-moR-1277-5p	TTTCTAACCTCCCAAA	16	1	0	0	1	no	-	-	-	-	-	-	-	-	-	-
hsa-mir-1304	hsa-moR-1304-5p	AAACACTTGAGCCCAGC	21	1	0	0	1	no	-	-	-	-	-	-	-	-	-	-
hsa-mir-1305	hsa-moR-1305-5p	TTTCAGAAGATCCTGCTGT	19	1	0	0	1	no	-	-	-	-	-	-	-	-	-	-
hsa-mir-1343	hsa-moR-1343-5p	CGATGATGCTGGCGTCGGTGC	21	1	0	0	1	no	-	-	-	-	-	-	-	-	-	-
hsa-mir-141	hsa-moR-141-5p	TGTCGGCCGGCCCTGGG	17	0	1	0	1	no	-	-	-	-	-	-	-	-	-	-
hsa-mir-154	hsa-moR-154-5p	TAGCGTGTGGTACTTGAAGA	20	0	1	0	1	no	-	-	-	-	-	-	-	-	-	-
hsa-mir-1908	hsa-moR-1908-5p	CAGTGTGATTTGGGGC	16	1	0	0	1	no	-	-	-	-	-	-	-	-	-	-
hsa-mir-1915	hsa-moR-1915-5p	GGGTCCTGGCGCTGAGAGGCCG	22	0	1	0	1	no	-	-	-	-	-	-	-	-	-	-
hsa-mir-193a	hsa-moR-193a-5p	CTCCGAGGATGGGAGCTGAGGGC	23	0	1	0	1	no	-	-	-	-	-	-	-	-	-	-
hsa-mir-194-2	hsa-moR-194-2-5p	CTCCAATTGGTTCCCGCCCCC	21	0	1	0	1	no	-	-	-	-	-	-	-	-	-	-
hsa-mir-2116	hsa-moR-2116-5p	GTCAGTGGGACCTAGGCTA	19	1	0	0	1	no	-	-	-	-	-	-	-	-	-	-
hsa-mir-216a	hsa-moR-216a-5p	ACGGATGGCTGTGAGTTGGC	20	0	1	0	1	no	-	-	-	-	-	-	-	-	-	-
hsa-mir-2278	hsa-moR-2278-5p	TGATTGTGCTGCAGGTGTTGG	21	1	0	0	1	no	-	-	-	-	-	-	-	-	-	-
hsa-mir-2355	hsa-moR-2355-5p	ATAACATTGTCAGACGTG	18	1	0	0	1	no	-	-	-	-	-	-	-	-	-	-
hsa-mir-23b	hsa-moR-23b-5p	CTCTCAGGTGCTCTGGCTGCT	21	1	0	0	1	no	-	-	-	-	-	-	-	-	-	-
hsa-mir-2467	hsa-moR-2467-5p	ACAGACGCTTGGACAGGCACC	21	0	1	0	1	no	-	-	-	-	-	-	-	-	-	-
hsa-mir-26a-1	hsa-moR-26a-1-5p	GGCGAAGGCCGTGGCC	16	1	0	0	1	no	-	-	-	-	-	-	-	-	-	-
hsa-mir-29c	hsa-moR-29c-5p	CCCATCTCTTACACAGGCTG	20	0	1	0	1	no	-	-	-	-	-	-	-	-	-	-
hsa-mir-30e	hsa-moR-30e-5p	CTTTCTGGGCAGTCTTTGCTAC	22	1	0	0	1	no	-	-	-	-	-	-	-	-	-	-
hsa-mir-3124	hsa-moR-3124-5p	AGTCCGGACGCTGGCGGG	18	1	0	0	1	no	-	-	-	-	-	-	-	-	-	-
hsa-mir-3144	hsa-moR-3144-5p	CAGACTGAAACTACACTTTA	20	1	0	0	1	no	-	-	-	-	-	-	-	-	-	-
hsa-mir-3180-4	hsa-moR-3180-4-5p	CTCCAGTGCGACGGGCGGAG	20	1	0	0	1	no	-	-	-	-	-	-	-	-	-	-
hsa-mir-3187	hsa-moR-3187-5p	CAGCGAGGGCGCGCTGGC	18	1	0	0	1	no	-	-	-	-	-	-	-	-	-	-
hsa-mir-3188	hsa-moR-3188-5p	ATAACTCCTTGGCGCCTCC	19	1	0	0	1	no	-	-	-	-	-	-	-	-	-	-
hsa-mir-323b	hsa-moR-323b-5p	CACCTCATGGTACTCGGAGGG	21	1	0	0	1	no	-	-	-	-	-	-	-	-	-	-
hsa-mir-345	hsa-moR-345-5p	GAGACCCAAACCCTAGGTC	19	1	0	0	1	no	-	-	-	-	-	-	-	-	-	-
hsa-mir-346	hsa-moR-346-5p	GAGGTCTCTGTGTTGGGCG	19	1	0	0	1	no	-	-	-	-	-	-	-	-	-	-
hsa-mir-3675	hsa-moR-3675-5p	AGGAAAGGGTGGATGATAAG	21	0	1	0	1	no	-	-	-	-	-	-	-	-	-	-
hsa-mir-377	hsa-moR-377-5p	TGATGTTTGACCCTTGAGC	19	1	0	0	1	no	-	-	-	-	-	-	-	-	-	-
hsa-mir-378a	hsa-moR-378a-5p	GGTGACAGAGCCACCCAGGG	20	0	1	0	1	no	-	-	-	-	-	-	-	-	-	-
hsa-mir-379	hsa-moR-379-5p	TTCCGTGGTTCCTGAAGAGA	20	0	0	1	1	no	-	-	-	-	-	-	-	-	-	-
hsa-mir-3940	hsa-moR-3940-5p	AAGCAGCTTATCGAGGAAAAG	21	0	1	0	1	no	-	-	-	-	-	-	-	-	-	-
hsa-mir-423	hsa-moR-423-5p	GTGAGGAAATAAAGGAAGTTAGGC	24	0	1	0	1	no	-	-	-	-	-	-	-	-	-	-
hsa-mir-429	hsa-moR-429-5p	CCACCGCCGGCCGATGGGC	19	1	0	0	1	no	-	-	-	-	-	-	-	-	-	-
hsa-mir-4473	hsa-moR-4473-5p	AAAAGGAACAGGGGACA	17	0	1	0	1	no	-	-	-	-	-	-	-	-	-	-
hsa-mir-4517	hsa-moR-4517-5p	ATTCTATACCTTGCCAG	17	1	0	0	1	no	-	-	-	-	-	-	-	-	-	-
hsa-mir-4636	hsa-moR-4636-5p	CACTGAGCTATAGATTCAG	19	0	1	0	1	no	-	-	-	-	-	-	-	-	-	-
hsa-mir-4677	hsa-moR-4677-5p	TGGAGTAGCAAAGCAGCAA	19	0	1	0	1	no	-	-	-	-	-	-	-	-	-	-
hsa-mir-4706	hsa-moR-4706-5p	CCTTGAAATTGCTACGGGG	19	0	1	0	1	no	-	-	-	-	-	-	-	-	-	-
hsa-mir-4762	hsa-moR-4762-5p	GTGTAGTCATATCCCATTATTTC	23	0	0	1	1	no	-	-	-	-	-	-	-	-	-	-
hsa-mir-4781	hsa-moR-4781-5p	TTTGGAAGAGGGCTTAGGTGC	21	1	0	0	1	no	-	-	-	-	-	-	-	-	-	-
hsa-mir-4802	hsa-moR-4802-5p	TGAGCTGACTGGCTTG	16	1	0	0	1	no	-	-	-	-	-	-	-	-	-	-
hsa-mir-486	hsa-moR-486-5p	CTCCATCCTCCCTGGGGCA	19	1	0	0	1	no	-	-	-	-	-	-	-	-	-	-
hsa-mir-487b	hsa-moR-487b-5p	AACCTTTGGTACTTGGAGA	19	0	0	1	1	no	-	-	-	-	-	-	-	-	-	-
hsa-mir-504	hsa-moR-504-5p	ATCAGCTGCTGTTGGGA	17	1	0	0	1	no	-	-	-	-	-	-	-	-	-	-
hsa-mir-505	hsa-moR-505-5p	TAAATTGATGCACCCAGTGG	20	0	1	0	1	no	-	-	-	-	-	-	-	-	-	-
hsa-mir-5091	hsa-moR-5091-5p	TGGCGGCGACTGTGGCGAC	19	1	0	0	1	no	-	-	-	-	-	-	-	-	-	-
hsa-mir-518e	hsa-moR-518e-5p	GCAAGATCTCAGGCTGTGACC	21	0	1	0	1	no	-	-	-	-	-	-	-	-	-	-
hsa-mir-548u	hsa-moR-548u-5p	TGAGACTATTAGGATGGTG	19	0	1	0	1	no	-	-	-	-	-	-	-	-	-	-
hsa-mir-576	hsa-moR-576-5p	TTTACAATCCAACGA	15	0	1	0	1	no	-	-	-	-	-	-	-	-	-	-
hsa-mir-611	hsa-moR-611-5p	GGCGGAGCGGCGGAT	15	1	0	0	1	no	-	-	-	-	-	-	-	-	-	-
hsa-mir-638	hsa-moR-638-5p	CGTGGGCCGGTGAGCGGGCGCGGC	24	0	1	0	1	no	-	-	-	-	-	-	-	-	-	-
hsa-mir-654	hsa-moR-654-5p	GAGGTGGGGCTGAGCCCTCCAGGGTAAGTGGAAAGA	36	0	0	1	1	no	-	-	-	-	-	-	-	-	-	-
hsa-mir-758	hsa-moR-758-5p	CGTGCCTGGATACATGAGA	19	0	0	1	1	no	-	-	-	-	-	-	-	-	-	-
hsa-mir-760	hsa-moR-760-5p	CGAGCTCTCGGAGGATGCTG	20	1	0	0	1	no	-	-	-	-	-	-	-	-	-	-
hsa-mir-874	hsa-moR-874-5p	GGATGAATTGTTGGTGTTAGCCC	23	0	1	0	1	no	-	-	-	-	-	-	-	-	-	-
hsa-mir-887	hsa-moR-887-5p	GTCAGAGAGCCCCGGGGTGCAGA	23	0	1	0	1	no	-	-	-	-	-	-	-	-	-	-
hsa-mir-9-1	hsa-moR-9-1-5p	AGGAGGCGGGGTTGGTTGTTA	21	0	1	0	1	no	-	-	-	-	-	-	-	-	-	-
hsa-mir-92b	hsa-moR-92b-5p	CCGGGCCCCGGGCGGGCGGG	20	1	0	0	1	no	-	-	-	-	-	-	-	-	-	-
hsa-mir-935	hsa-moR-935-5p	AAGGCCGGCGGGGGCGCGGGCGGC	24	1	0	0	1	no	-	-	-	-	-	-	-	-	-	-
hsa-mir-33a	hsa-moR-33a-3p	CAGAGGCCTGCCTGGCCC	18	0	1	0	1	yes	-	-	-	-	-	-	-	-	-	-
hsa-let-7f-2	hsa-let-7f-2-3p	CCACGGTGGTACACTTCTTCTCCGAC	26	1	0	0	1	yes	-	-	-	-	-	-	-	-	-	-
hsa-mir-92a-2	hsa-moR-92a-2-3p	GGAAGAAAGGAGGATTTTTATCGTC	25	0	1	0	1	yes	-	-	-	-	-	-	-	-	-	-
hsa-mir-130a	hsa-moR-130a-3p	TGGCCGTGTAGTGCTACCCAGC	22	1	0	0	1	yes	-	-	-	-	-	-	-	-	-	-
hsa-mir-25	hsa-moR-25-3p	CAGTGCCGGCCCAACACTGCGG	22	0	1	0	1	yes	-	-	-	-	-	-	-	-	-	-
hsa-mir-517a	hsa-moR-517a-3p	TACTGTTTGAGACAAGCAACGTTGAAG	27	0	1	0	1	yes	-	-	-	-	-	-	-	-	-	-
hsa-mir-517c	hsa-moR-517c-3p	TACTGTTTGAGAAAATCAAC	20	0	1	0	1	yes	-	-	-	-	-	-	-	-	-	-
hsa-mir-518b	hsa-moR-518b-3p	TTACGGTTTGAGTAAAGCAGCGTTGAAG	28	0	1	0	1	yes	-	-	-	-	-	-	-	-	-	-
hsa-mir-125b-1	hsa-moR-125b-1-3p	GCGAGTCGTGCTTTTGCATCCTGGAAA	27	0	1	0	1	yes	-	-	-	-	-	-	-	-	-	-
hsa-mir-124-1	hsa-moR-124-1-3p	GAATGGGGCTGGCTGAGCACC	21	1	0	0	1	yes	-	-	-	-	-	-	-	-	-	-
hsa-mir-301a	hsa-moR-301a-3p	CTGAAAGCAGGATGCACGCCAGAA	24	1	0	0	1	yes	-	-	-	-	-	-	-	-	-	-
hsa-mir-361	hsa-moR-361-3p	TTCCTTTTCCTCCTCCTGCTCTGAGAATCACCG	33	0	1	0	1	yes	-	-	-	-	-	-	-	-	-	-
hsa-mir-3648	hsa-moR-3648-3p	TTTCTCGCGCCTTCCCCG	18	1	0	0	1	yes	-	-	-	-	-	-	-	-	-	-
hsa-mir-26b	hsa-moR-26b-3p	GGGGACCGGTGCCCTGCAGCCTTGGGGTGAGGGGG	35	1	0	0	1	yes	-	-	-	-	-	-	-	-	-	-
hsa-let-7g	hsa-let-7g-3p	CAGGAACAGCGCGCCAGCTGCCAAG	25	1	0	0	1	no	-	-	-	-	-	-	-	-	-	-
hsa-mir-106a	hsa-moR-106a-3p	ATTACCATGGTGATTTAGTCA	21	1	0	0	1	no	-	-	-	-	-	-	-	-	-	-
hsa-mir-1181	hsa-moR-1181-3p	GTGTCTGATGATGAAGACG	19	1	0	0	1	no	-	-	-	-	-	-	-	-	-	-
hsa-mir-129-2	hsa-moR-129-2-3p	TTGCGGAGGGCGCACTCG	18	0	1	0	1	no	-	-	-	-	-	-	-	-	-	-
hsa-mir-138-1	hsa-moR-138-1-3p	CACACCACACTACAGGCAGCA	21	1	0	0	1	no	-	-	-	-	-	-	-	-	-	-
hsa-mir-140	hsa-moR-140-3p	AGGATACCGGGGCACCCTC	19	0	1	0	1	no	-	-	-	-	-	-	-	-	-	-
hsa-mir-187	hsa-moR-187-3p	AGGGACGCAGGTCCGCAGCAGAGCC	25	1	0	0	1	no	-	-	-	-	-	-	-	-	-	-
hsa-mir-1909	hsa-moR-1909-3p	GTGGATGGGCACAGCTCC	18	0	1	0	1	no	-	-	-	-	-	-	-	-	-	-
hsa-mir-190a	hsa-moR-190a-3p	CAGTGTCTTGCCCTGTCTCC	20	1	0	0	1	no	-	-	-	-	-	-	-	-	-	-
hsa-mir-1910	hsa-moR-1910-3p	TGAGGGCAAGTTCAGGGACAC	21	1	0	0	1	no	-	-	-	-	-	-	-	-	-	-
hsa-mir-193b	hsa-moR-193b-3p	TTTGGGGTCATTCTGGACAGC	21	0	1	0	1	yes	-	-	-	-	-	-	-	-	-	-
hsa-mir-199a-2	hsa-moR-199a-2-3p	GACTGGGCAAGGGAGAGCAACGC	23	0	0	1	1	no	-	-	-	-	-	-	-	-	-	-
hsa-mir-200a	hsa-moR-200a-3p	CAAAGGTGACCCGCCGCTCGCCGGGGA	27	1	0	0	1	yes	-	-	-	-	-	-	-	-	-	-
hsa-mir-214	hsa-moR-214-3p	TCACATGACAACCCAGCCTGAATGACAACC	35	0	0	1	1	yes	-	-	-	-	-	-	-	-	-	-
hsa-mir-24-2	hsa-moR-24-2-3p	GGGTCAAGCCCCCTTGGAGCC	21	0	1	0	1	no	-	-	-	-	-	-	-	-	-	-
hsa-mir-26a-2	hsa-moR-26a-2-3p	TGGAGGCAGCTGATGGTCCG	20	0	1	0	1	no	-	-	-	-	-	-	-	-	-	-
hsa-mir-29b-2	hsa-moR-29b-2-3p	TTAGGAGTAAGAATTGCAGCAC	22	0	1	0	1	no	-	-	-	-	-	-	-	-	-	-
hsa-mir-301b	hsa-moR-301b-3p	CTGGGACCAGCCTTGGGG	18	1	0	0	1	no	-	-	-	-	-	-	-	-	-	-
hsa-mir-302c	hsa-moR-302c-3p	AGGTGTCTCCAAGCCAGCA	19	0	1	0	1	yes	-	-	-	-	-	-	-	-	-	-
hsa-mir-3143	hsa-moR-3143-3p	CTGGAAAGCAATGAAGAC	18	1	0	0	1	no	-	-	-	-	-	-	-	-	-	-
hsa-mir-362	hsa-moR-362-3p	AGAGGCTGAGCCTTGTCTAC	20	0	1	0	1	yes	-	-	-	-	-	-	-	-	-	-
hsa-mir-3658	hsa-moR-3658-3p	TTGGAACGACAAAATGAAACA	21	0	1	0	1	no	-	-	-	-	-	-	-	-	-	-
hsa-mir-371a	hsa-moR-371a-3p	TACCGCTTGAGAAGACTCAAC	21	0	1	0	1	yes	-	-	-	-	-	-	-	-	-	-
hsa-mir-374b	hsa-moR-374b-3p	GTCCGTGTCTATGGCTCTCGTCTACCA	27	1	0	0	1	no	-	-	-	-	-	-	-	-	-	-
hsa-mir-4285	hsa-moR-4285-3p	GCTGCGCGGGCGGGGGCTGAAGAC	24	0	1	0	1	no	-	-	-	-	-	-	-	-	-	-
hsa-mir-432	hsa-moR-432-3p	TGGAGTAGATCAGTGGGCAG	20	0	0	1	1	no	-	-	-	-	-	-	-	-	-	-
hsa-mir-4439	hsa-moR-4439-3p	ACCAGGCCAGGAGACAGAATT	21	0	1	0	1	no	-	-	-	-	-	-	-	-	-	-
hsa-mir-4485	hsa-moR-4485-3p	AACTGTGCAAAGGTAGCATAATCA	24	0	0	1	1	no	-	-	-	-	-	-	-	-	-	-
hsa-mir-4515	hsa-moR-4515-3p	GAGGTGGAGCTTCTGCAGGCTGG	23	1	0	0	1	no	-	-	-	-	-	-	-	-	-	-
hsa-mir-4720	hsa-moR-4720-3p	AACTGTCGTTGTGTAT	16	0	0	1	1	no	-	-	-	-	-	-	-	-	-	-
hsa-mir-502	hsa-moR-502-3p	AGAGGGGGAGCTCAACTGTACC	22	1	0	0	1	no	-	-	-	-	-	-	-	-	-	-
hsa-mir-516b-1	hsa-moR-516b-1-3p	TTACTCTTTGAGAAAAGCAAC	21	0	1	0	1	yes	-	-	-	-	-	-	-	-	-	-
hsa-mir-518f	hsa-moR-518f-3p	TTACTCTTTGAGAAAAGCAAC	21	0	1	0	1	yes	-	-	-	-	-	-	-	-	-	-
hsa-mir-519b	hsa-moR-519b-3p	TACTGTTTGAGGAAAGCAACA	21	0	1	0	1	no	-	-	-	-	-	-	-	-	-	-
hsa-mir-519d	hsa-moR-519d-3p	TACCGTTTGGGAAAAGCCACGTTGAA	26	1	0	0	1	no	-	-	-	-	-	-	-	-	-	-
hsa-mir-520a	hsa-moR-520a-3p	TTTCGGTTTGAGTAAAGCAGCGTTGAA	27	0	1	0	1	yes	-	-	-	-	-	-	-	-	-	-
hsa-mir-520g	hsa-moR-520g-3p	TACCGTTTGGGAAAAGCAGTG	21	0	1	0	1	no	-	-	-	-	-	-	-	-	-	-
hsa-mir-541	hsa-moR-541-3p	CTGCTTGTGGCATCCATCGTCTGGCCCGA	29	1	0	0	1	no	-	-	-	-	-	-	-	-	-	-
hsa-mir-548e	hsa-moR-548e-3p	ACCAACCTGATAGAAGA	17	1	0	0	1	no	-	-	-	-	-	-	-	-	-	-
hsa-mir-5699	hsa-moR-5699-3p	GATGTAGAAGCACTTGCCGC	20	0	1	0	1	no	-	-	-	-	-	-	-	-	-	-
hsa-mir-612	hsa-moR-612-3p	GACTCTCAAATGAGGACAGCAGAGC	25	0	0	1	1	no	-	-	-	-	-	-	-	-	-	-
hsa-mir-942	hsa-moR-942-3p	TACTTTCCTAATATTTGCC	19	1	0	0	1	no	-	-	-	-	-	-	-	-	-	-
hsa-mir-124-2	hsa-moR-124-2-3p	GAGCGGAGCCTACGGCTGCAC	21	1	0	0	1	yes
