# Supplementary material for: Selective MicroRNA-Offset RNA Expression in Human Embryonic Stem Cells
Source: PLoS One. 2015 Mar 30;10(3):e0116668. doi: 10.1371/journal.pone.0116668 (PMC4378994; doi:10.1371/journal.pone.0116668)
Supplement: S4 Table — (XLSX) [file pone.0116668.s004.xlsx]

## Sheet: moRNA differential expression
DESeq results
Comparison of moR expression in ES cells and skin cells
id	mir hairpin	baseMean	hESC mean	HFF-1 mean	foldChange	log2FoldChange	pval	padj	resVarA	resVarB	Cluster
hsa-moR-367-3p	hsa-mir-367	159.162	238.684	0.117825	0.000493644	-10.9842	1.7123e-95	1.86641e-93	0.705664	NA	miR-302 cluster
hsa-moR-302a-5p	hsa-mir-302a	22.1798	33.2107	0.117825	0.0035478	-8.13886	9.46056e-20	5.15601e-18	0.041124	NA	miR-302 cluster
hsa-moR-103a-2-3p	hsa-mir-103a-2	36.8673	54.4761	1.64955	0.0302803	-5.04548	1.44449e-18	5.24831e-17	0.210389	NA	miR-103a/b cluster
hsa-moR-367-5p	hsa-mir-367	15.4086	23.1129	0	0	-Inf	6.63151e-18	1.80709e-16	6.10245	NA	miR-302 cluster
hsa-moR-92a-1-3p	hsa-mir-92a-1	17.1098	25.6057	0.117825	0.00460151	-7.76368	1.49577e-17	3.26078e-16	0.108348	NA	miR-17–92 cluster
hsa-moR-421-5p	hsa-mir-421	19.1565	28.558	0.353475	0.0123774	-6.33614	1.66992e-16	3.03369e-15	0.0625871	NA	miR-374b/421 cluster
hsa-moR-517a-5p	hsa-mir-517a	12.2795	18.4193	0	0	-Inf	2.759e-15	3.53308e-14	1.05026	NA	C19MC
hsa-moR-517c-5p	hsa-mir-517c	12.2795	18.4193	0	0	-Inf	2.759e-15	3.53308e-14	1.05026	NA	C19MC
hsa-moR-363-5p	hsa-mir-363	14.0832	21.066	0.117825	0.00559315	-7.48212	2.91722e-15	3.53308e-14	0.0145742	NA	miR-106a-363 cluster
hsa-moR-296-5p	hsa-mir-296	12.7892	19.066	0.23565	0.0123597	-6.33821	9.67912e-14	1.05502e-12	0.0111855	NA	miR-296/298 cluster
hsa-moR-302b-5p	hsa-mir-302b	7.9621	11.9431	0	0	-Inf	2.17835e-12	2.15855e-11	0.633557	NA	miR-302 cluster
hsa-moR-1283-2-5p	hsa-mir-1283-2	6.70861	10.0629	0	0	-Inf	1.49906e-11	1.25691e-10	0.0263003	NA	C19MC
hsa-moR-525-5p	hsa-mir-525	6.70861	10.0629	0	0	-Inf	1.49906e-11	1.25691e-10	0.0263003	NA	C19MC
hsa-moR-20a-5p	hsa-mir-20a	6.3907	9.58605	0	0	-Inf	2.42761e-11	1.89007e-10	0.197694	NA	miR-17–92 cluster
hsa-moR-518a-1-5p	hsa-mir-518a-1	5.49254	8.2388	0	0	-Inf	5.87086e-11	3.76426e-10	0.718326	NA	C19MC
hsa-moR-520d-5p	hsa-mir-520d	5.49254	8.2388	0	0	-Inf	5.87086e-11	3.76426e-10	0.718326	NA	C19MC
hsa-moR-527-5p	hsa-mir-527	5.49254	8.2388	0	0	-Inf	5.87086e-11	3.76426e-10	0.718326	NA	C19MC
hsa-moR-515-2-5p	hsa-mir-515-2	4.6222	6.9333	0	0	-Inf	8.07912e-10	4.63486e-09	4.035	NA	C19MC
hsa-moR-519e-5p	hsa-mir-519e	4.6222	6.9333	0	0	-Inf	8.07912e-10	4.63486e-09	4.035	NA	C19MC
hsa-moR-515-1-5p	hsa-mir-515-1	4.55952	6.83929	0	0	-Inf	8.99651e-10	4.9031e-09	3.83609	NA	C19MC
hsa-moR-520a-5p	hsa-mir-520a	3.15592	4.73388	0	0	-Inf	1.10606e-09	5.48002e-09	0.640753	NA	C19MC
hsa-moR-521-1-5p	hsa-mir-521-1	3.15592	4.73388	0	0	-Inf	1.10606e-09	5.48002e-09	0.640753	NA	C19MC
hsa-moR-302d-5p	hsa-mir-302d	3.61132	5.41698	0	0	-Inf	1.21573e-09	5.76152e-09	0.00107575	NA	miR-302 cluster
hsa-moR-17-5p	hsa-mir-17	4.01618	6.02427	0	0	-Inf	1.57215e-09	7.14019e-09	4.2454	NA	miR-17–92 cluster
hsa-moR-518f-5p	hsa-mir-518f	3.59414	5.39122	0	0	-Inf	3.30816e-09	1.38688e-08	3.21128	NA	C19MC
hsa-moR-524-5p	hsa-mir-524	3.59414	5.39122	0	0	-Inf	3.30816e-09	1.38688e-08	3.21128	NA	C19MC
hsa-moR-522-5p	hsa-mir-522	2.61663	3.92494	0	0	-Inf	3.55813e-09	1.43643e-08	0.16891	NA	C19MC
hsa-moR-519a-1-5p	hsa-mir-519a-1	2.74602	4.11903	0	0	-Inf	3.93803e-09	1.53302e-08	0.196815	NA	C19MC
hsa-moR-519a-2-5p	hsa-mir-519a-2	2.50796	3.76194	0	0	-Inf	5.05502e-09	1.89999e-08	0.205243	NA	C19MC
hsa-moR-876-5p	hsa-mir-876	2.16932	3.25398	0	0	-Inf	1.81112e-08	6.58039e-08	0.0057626	NA
hsa-moR-516a-2-5p	hsa-mir-516a-2	2.37807	3.5671	0	0	-Inf	2.47084e-08	8.68779e-08	1.3812	NA	C19MC
hsa-moR-302a-3p	hsa-mir-302a	2.24867	3.37301	0	0	-Inf	2.63313e-08	8.9691e-08	0.0660367	NA	miR-302 cluster
hsa-moR-16-2-3p	hsa-mir-16-2	3.68396	5.46702	0.117825	0.021552	-5.53604	2.73666e-08	9.03927e-08	0.10806	NA
hsa-moR-625-5p	hsa-mir-625	7.44379	10.8711	0.589125	0.0541918	-4.20578	4.92306e-08	1.57827e-07	0.509106	NA
hsa-moR-128-1-5p	hsa-mir-128-1	3.2092	4.69598	0.23565	0.0501812	-4.31671	2.74137e-07	8.53741e-07	2.16793e-05	NA
hsa-moR-21-3p	hsa-mir-21	1.73869	2.60804	0	0	-Inf	5.69024e-07	1.71241e-06	0.359244	NA
hsa-moR-18a-5p	hsa-mir-18a	1.63861	2.45792	0	0	-Inf	5.81278e-07	1.71241e-06	0.795446	NA	miR-17–92 cluster
hsa-moR-526b-5p	hsa-mir-526b	1.58403	2.37604	0	0	-Inf	1.38809e-06	3.98164e-06	0.486571	NA	C19MC
hsa-moR-106b-5p	hsa-mir-106b	1.55472	2.33207	0	0	-Inf	2.33412e-06	6.52357e-06	1.14792	NA	miR-106b-25
hsa-moR-3676-5p	hsa-mir-3676	4.65177	6.6831	0.589125	0.0881515	-3.50387	2.93198e-06	7.98965e-06	0.612622	NA
hsa-moR-652-5p	hsa-mir-652	1.442	2.163	0	0	-Inf	4.68685e-06	1.24602e-05	0.023399	NA
hsa-let-7f-2-5p-moR	hsa-let-7f-2	4.12107	5.88704	0.589125	0.100072	-3.3209	5.63834e-06	1.44051e-05	0.181476	NA
hsa-moR-302b-3p	hsa-mir-302b	1.37528	2.06292	0	0	-Inf	5.68274e-06	1.44051e-05	0.87593	NA	miR-302 cluster
hsa-moR-708-5p	hsa-mir-708	2.1013	3.03412	0.23565	0.0776666	-3.68656	1.09119e-05	2.70318e-05	2.27399	NA
hsa-moR-373-5p	hsa-mir-373	1.35406	2.03109	0	0	-Inf	2.57662e-05	6.24115e-05	1.77195	NA	miR-371/372/373 cluster
hsa-moR-520b-5p	hsa-mir-520b	1.3207	1.98105	0	0	-Inf	2.83091e-05	6.70802e-05	0.624027	NA	C19MC
hsa-moR-16-1-5p	hsa-mir-16-1	1.22466	1.837	0	0	-Inf	6.24392e-05	0.000144806	0.00580591	NA
hsa-moR-135a-2-3p	hsa-mir-135a-2	1.14531	1.71797	0	0	-Inf	6.85282e-05	0.000155616	0.150568	NA
hsa-moR-130a-5p	hsa-mir-130a	1.16604	1.74905	0	0	-Inf	9.90757e-05	0.000220393	0.834364	NA
hsa-moR-191-5p	hsa-mir-191	1.91919	2.70205	0.353475	0.130817	-2.93437	0.00010175	0.000221815	0.521436	NA
hsa-moR-16-1-3p	hsa-mir-16-1	1.04928	1.57391	0	0	-Inf	0.000142906	0.000305426	1.42859	NA
hsa-moR-324-5p	hsa-mir-324	4.56627	6.31919	1.06042	0.16781	-2.5751	0.000193518	0.000398014	1.91471	NA
hsa-moR-374a-5p	hsa-mir-374a	1.08668	1.63002	0	0	-Inf	0.00019353	0.000398014	0.215909	NA
hsa-moR-20b-3p	hsa-mir-20b	1.03664	1.55496	0	0	-Inf	0.000226325	0.000456842	0.204975	NA	miR-106a-363 cluster
hsa-moR-20b-5p	hsa-mir-20b	1.04069	1.56103	0	0	-Inf	0.000332267	0.000646734	0.364945	NA	miR-106a-363 cluster
hsa-moR-744-5p	hsa-mir-744	1.04069	1.56103	0	0	-Inf	0.000332267	0.000646734	0.364945	NA
hsa-moR-370-5p	hsa-mir-370	2.65688	1.51099	4.94865	3.2751	1.71154	0.000444912	0.000850796	0.000133373	NA
