# Supplementary material for: Selective MicroRNA-Offset RNA Expression in Human Embryonic Stem Cells
Source: PLoS One. 2015 Mar 30;10(3):e0116668. doi: 10.1371/journal.pone.0116668 (PMC4378994; doi:10.1371/journal.pone.0116668)
Supplement: S5 Table — (XLSX) [file pone.0116668.s005.xlsx]

## Sheet: miR103 vs neg1, 216 genes up
ProbeID	p (Benjamini Hochberg FDR corrected)	p	FC ([miR103] vs [neg1])	Log FC ([miR103] vs [neg1])	Regulation ([miR103] vs [neg1])	Symbol	Entrez_Gene_ID	Definition	Chromosome	Chromosome Start Index(Avadis)	Chromosome End Index(Avadis)	Probe_Sequence
3400458	8.10822e-05	1.26489e-06	4.8264	2.27095	up	MSRB3	253827	Homo sapiens methionine sulfoxide reductase B3 (MSRB3), transcript variant 1, mRNA,	chr12	64145826	64145875	CTCAGCCATCAGCGTCCAGACCATCCTAGAAGTCTTTCCCAATCTCACAG
1300470	0.000300853	1.26573e-05	4.53539	2.18123	up	MAMDC2	256691	Homo sapiens MAM domain containing 2 (MAMDC2), mRNA,	chr9	72031386	72031435	ACAAGGCAATGCTACCTTCTTTATTCCCCCTTTGAACTACCTTTGAAGTC
6020255	0.00360777	0.000489905	3.87768	1.95519	up	EGR2	1959	Homo sapiens early growth response 2 (Krox-20 homolog, Drosophila) (EGR2), mRNA,	chr10	64242090	64242139	GCATGCAATTGTGTTGGAAGTGTCCTTGGTCGCCTTGTGTGATGTAGACA
4760593	0.000118876	2.62351e-06	3.75821	1.91005	up	CD59	966	Homo sapiens CD59 molecule, complement regulatory protein (CD59), transcript variant 2, mRNA,	chr11	33681376	33681425	CCTCATAGGGACTTTGCCTCCTGACAGCAGTTTATGGGTGTTCATTGTGG
5690341	0.00026508	1.01502e-05	3.26504	1.7071	up			Homo sapiens cDNA clone IMAGE:5297467	chr1	196556712	196556761	GGCGACCAGTTTCTCACAGAATTGTGAAGCCTGAAGGCCAAGAGGAAGTC
1510736	0.000203695	6.68751e-06	3.24078	1.69634	up	KLC1	3831	Homo sapiens kinesin light chain 1 (KLC1), transcript variant 1, mRNA,	chr14	103222158	103222207	GCTCGGACTCCGGGTCTCCCTAGGATATGCCCCAGTAGCATTTGCTGTGT
4860239	0.0015301	0.000144358	3.15339	1.65691	up	WDR1	9948	Homo sapiens WD repeat domain 1 (WDR1), transcript variant 1, mRNA,	chr4	10099367	10099416	CATACCGGCTGGCCACGGGAAGCGATGATAACTGCGCGGCATTCTTTGAG
3360224	0.0126363	0.00280146	3.14584	1.65345	up	MMP1	4312	Homo sapiens matrix metallopeptidase 1 (interstitial collagenase) (MMP1), mRNA,	chr11	102165974	102166023	CAAGACAGAAAGAGACAGGAGACATGAGTCTTTGCCGGAGGAAAAGCAGC
1440376	0.00264751	0.000315486	3.09155	1.62833	up	NTM	50863	Homo sapiens neurotrimin (NTM), transcript variant 2, mRNA,	chr11	131710915	131710964	CGCAGGGTCCTTTCTCAGACATTACTGCATGCTGTATATGGCGTTAGCTG
380327	0.000423094	2.1039e-05	3.09009	1.62765	up	LOC730820	730820	PREDICTED: Homo sapiens similar to nuclear receptor binding factor 2 (LOC730820), mRNA,				GGTGGACTGTGGGAGCAGAGGCATTGCCAGGACTTGGGAAACAGTCACTG
2370129	0.000212663	7.17046e-06	3.05357	1.6105	up	DERL1	79139	Homo sapiens Der1-like domain family, member 1 (DERL1), mRNA,	chr8	124095158	124095207	GGCCATTACTCCAATTATGTTGCACGTACACTCATTGTACAGGCGTGGAG
3120379	8.11486e-05	1.28319e-06	3.01768	1.59344	up	DPY19L1	23333	Homo sapiens dpy-19-like 1 (C, elegans) (DPY19L1), mRNA,	chr7	34969856	34969905	GCATCCACACCTTTGATGGCAATGCAGATTGGTAGCAGGTTCCATAGGCG
2140653	0.0152163	0.00361729	3.0143	1.59182	up	TPM1	7168	Homo sapiens tropomyosin 1 (alpha) (TPM1), transcript variant 6, mRNA,	chr15	61149697	61149746	CAGAAGCCCCTGGTTGTCTGAAAGGTATGCTTTACTCAGTCTAATGGTGC
6220543	0.000714286	4.69127e-05	2.96234	1.56674	up	HIF1A	3091	Homo sapiens hypoxia-inducible factor 1, alpha subunit (basic helix-loop-helix transcription factor) (HIF1A), transcript variant 1, mRNA,	chr14	61282171	61282220	TTACAGCAGCCAGACGATCATGCAGCTACTACATCACTTTCTTGGAAACG
6580364	0.00199303	0.000209937	2.93168	1.55173	up	NEK7	140609	Homo sapiens NIMA (never in mitosis gene a)-related kinase 7 (NEK7), mRNA,	chr1	196555203	196555252	GTGCATCAACCCAGATCCAGAGAAGCGACCAGACGTCACCTATGTTTATG
6250154	1.40057e-05	1.6944e-09	2.91297	1.54249	up	LZTFL1	54585	Homo sapiens leucine zipper transcription factor-like 1 (LZTFL1), mRNA,	chr3	45865671	45865720	GGTGGTTTGAGCCTTGATTAGACTTTTGATGTGCTAAGCCAGACAGGCAG
2640576	9.53559e-05	1.80536e-06	2.87709	1.52461	up	MCFD2	90411	Homo sapiens multiple coagulation factor deficiency 2 (MCFD2), mRNA,	chr2	47129504	47129553	ATTAGGAATGTCAGGACTTTATCAGCAGGGGTAAAACTACCACCTGGCCT
510762	0.00246121	0.000284687	2.83966	1.50572	up	FAM62B	57488	Homo sapiens family with sequence similarity 62 (C2 domain containing) member B (FAM62B), mRNA,	chr7	158216596	158216645	GCCAAATGCAGGCCTGTGTGTAGCTGTGTGTTTTTTCTGTGGTTGCCGCA
7550546	0.000138858	3.37166e-06	2.8353	1.5035	up	C3orf64	285203	Homo sapiens chromosome 3 open reading frame 64 (C3orf64), mRNA,	chr3	69108236	69108285	GGACTGTCTTGCATACCTTCTGTCTGGTTTCCACTGATTCCTTCTTAGCC
5820343	0.000288745	1.17418e-05	2.80919	1.49016	up	ERCC5	2073	Homo sapiens excision repair cross-complementing rodent repair deficiency, complementation group 5 (ERCC5), mRNA,	chr13	102326079	102326128	CGCAGAACTCAGTGAAGGAAGCTCCCGTGAAGAATGGAGGTGCGACCACC
6650121	0.00133481	0.000117887	2.80207	1.48649	up	C1orf71	163882	Homo sapiens chromosome 1 open reading frame 71 (C1orf71), mRNA,	chr1	244896962	244897011	AAATCTGTCCGTTAGGTGGCCTTTCCTTATCTGAGGTGTAGTGGTCTAAC
780010	0.000782584	5.36336e-05	2.79924	1.48503	up	SFRS2IP	9169	Homo sapiens splicing factor, arginine/serine-rich 2, interacting protein (SFRS2IP), mRNA,	chr12	46313050	46313099	GGCCACAGTGTGTACTGCTGGAATGTTCCATCCAAAAGATGTAGCTTCAG
270053	4.70356e-05	4.47188e-07	2.79355	1.4821	up	GABPA	2551	Homo sapiens GA binding protein transcription factor, alpha subunit 60kDa (GABPA), mRNA,	chr21	26065252	26065301	GGTTTTGCACCATCCTCTTACGGCCTAGAGAGTTGACAAGTTGCTTGTAG
3460121	0.000632345	3.93016e-05	2.7922	1.4814	up	TOMM20	9804	Homo sapiens translocase of outer mitochondrial membrane 20 homolog (yeast) (TOMM20), nuclear gene encoding mitochondrial protein, mRNA,	chr1	233339819	233339868	GTAATCAGCTTGTTGTAGTGATGCTGGCCAAATGGTGCTCAGCAGGTGAG
4900010	0.000252233	9.27067e-06	2.78472	1.47753	up	HIF1A	3091	Homo sapiens hypoxia-inducible factor 1, alpha subunit (basic helix-loop-helix transcription factor) (HIF1A), transcript variant 1, mRNA,	chr14	61277556	61277605	AGTCGGACAGCCTCACCAAACAGAGCAGGAAAAGGAGTCATAGAACAGAC
630609	0.000279438	1.12305e-05	2.78402	1.47717	up	XYLT1	64131	Homo sapiens xylosyltransferase I (XYLT1), mRNA,	chr16	17197797	17197846	CCTTGAGGTAGAATGTGAGTCTCAGAAATGACTGCATTACCTGCcctttt
150681	0.000202624	6.55179e-06	2.77261	1.47124	up	ZNHIT6	54680	Homo sapiens zinc finger, HIT type 6 (ZNHIT6), mRNA,	chr1	86118751	86118800	CTGTGCCTTTCATCACATTCCTAGCCCACTCTCATCATTACTGCAGAAGG
2190603	0.000573566	3.39514e-05	2.76391	1.46671	up	PLS3	5358	Homo sapiens plastin 3 (T isoform) (PLS3), mRNA,	chrX	114790457	114790506	GCCCTCTTAGAATGTCCCTCTCTTGGGACTTGCTTAGATGATGGGATATG
1410170	0.000300089	1.25473e-05	2.75482	1.46196	up	GOPC	57120	Homo sapiens golgi associated PDZ and coiled-coil motif containing (GOPC), transcript variant 1, mRNA,	chr6	117988680	117988729	AGGAGGGAACTGTTGCAAAGCCATTTCATCGAGAAGGGGACAGAAGGAGA
110328	0.00049232	2.65693e-05	2.75453	1.46181	up	C14orf32	93487	Homo sapiens chromosome 14 open reading frame 32 (C14orf32), mRNA,	chr14	54605582	54605631	ACCCCTGGATAAAGGCACTTTCACTGCCTGTCACTGATCAGCAGATACTG
2680047	0.000513968	2.86459e-05	2.74168	1.45506	up	MAP2K4	6416	Homo sapiens mitogen-activated protein kinase kinase 4 (MAP2K4), mRNA,	chr17	11986853	11986902	TTCTGACTGTCCAGGAGCTAATCTGACCGTTCTATTGTGTGGATGACCAC
3890523	0.000199747	6.40039e-06	2.73231	1.45012	up	IL7R	3575	PREDICTED: Homo sapiens interleukin 7 receptor (IL7R), mRNA,				GCTGATTTCCTACCAGCCTTTGCCTCTTCCTTCAATGTGGTTTCCATGGG
5720292	0.000107318	2.23729e-06	2.71339	1.4401	up			Homo sapiens cDNA clone IMAGE:4797120	chrX	119444894	119444943	GAAGCTCACCACTGTATTGCTGCCATTAACTCATGCCAGAACCCTTTGCC
110307	0.000300853	1.26436e-05	2.70629	1.43632	up	FILIP1L	11259	Homo sapiens filamin A interacting protein 1-like (FILIP1L), transcript variant 2, mRNA,	chr3	101049761	101049810	CTGACCACGCTCACCCTCATCCAGTCCATACTGATATTTTTGCAAGGAAC
1050747	0.00465847	0.000704352	2.69688	1.43129	up	POSTN	10631	Homo sapiens periostin, osteoblast specific factor (POSTN), mRNA,	chr13	37035506	37041442	CAGGGAGACACACCCGTGAGGAAGTTGCAAGCCAACAAAAAAGTTCAAGG
1010482	0.0353041	0.0111676	2.69602	1.43083	up	TPM1	7168	Homo sapiens tropomyosin 1 (alpha) (TPM1), transcript variant 6, mRNA,	chr15	61149686	61149735	GGAACTCATGCCAGAAGCCCCTGGTTGTCTGAAAGGTATGCTTTACTCAG
1510553	0.00878654	0.00171245	2.69113	1.42821	up	DACT1	51339	Homo sapiens dapper, antagonist of beta-catenin, homolog 1 (Xenopus laevis) (DACT1), transcript variant 1, mRNA,	chr14	58184161	58184210	GACTTGGAGGCCAAACCTTAAATCCAGAGATAGCAGCCTCGATAGGGACC
4040519	0.00220263	0.000242012	2.66233	1.41269	up	LOC728059	728059	PREDICTED: Homo sapiens misc_RNA (LOC728059), miscRNA,				GTCAAACAATGTCAGATACCACATTCAAGGTCTTGCGCCGGCAGCTTCCG
3520241	0.0158747	0.00383403	2.65695	1.40977	up	DACT1	51339	Homo sapiens dapper, antagonist of beta-catenin, homolog 1 (Xenopus laevis) (DACT1), mRNA,	chr14	58184209	58184258	CCTTAAAAGGATTCACAAAAACTTTTGCCACACTTGGTGCCTAGGCCCTG
6290681	0.000116098	2.52736e-06	2.64925	1.40558	up	TOMM20	9804	Homo sapiens translocase of outer mitochondrial membrane 20 homolog (yeast) (TOMM20), nuclear gene encoding mitochondrial protein, mRNA,	chr1	235272872	235272921	GTAGAGCTTGCATAGTCGGCACTCAGTAAATGTTTGGTTCCTTTTGCCCC
150630	0.000490183	2.6347e-05	2.64637	1.40401	up	UBE2G1	7326	Homo sapiens ubiquitin-conjugating enzyme E2G 1 (UBC7 homolog, yeast) (UBE2G1), mRNA,	chr17	4173193	4173242	TTGATATGCCCACTCACCCTCGACGAATCTGCCCGCTTTGGGCTGTGGTG
6380743	0.000380115	1.77312e-05	2.63931	1.40016	up	STX12	23673	Homo sapiens syntaxin 12 (STX12), mRNA,	chr1	28023214	28023263	GTTGGGGTGGCACAGTGGCCCAAAGAGCAGCTTCAGAGATAATTCCTTGG
6370273	0.000437011	2.2265e-05	2.63283	1.39661	up	CTPS	1503	Homo sapiens CTP synthase (CTPS), mRNA,	chr1	41250525	41250574	TCCCCATGCCTGTGCGTGCGCTTCCTATTTCTAGGGCTGGGAAACACTCC
5900246	0.00712772	0.00128318	2.62949	1.39478	up			Homo sapiens MSTP131 (MST131) mRNA, complete cds	chr8	32744198	32744247	CCTTCCTGCCTAGTGTGACTTTTGCCCCCAAGAGTGCCTGGACAGCATTC
3360066	0.0015978	0.000154483	2.62486	1.39224	up	ANGPT1	284	Homo sapiens angiopoietin 1 (ANGPT1), mRNA,	chr8	108332821	108332870	GGGCCTCCTCTCATAAAAGAGACAGTTGTTGGCAAGGTAGCAATACCAGT
4490709	0.000281105	1.13381e-05	2.62191	1.39062	up	FILIP1L	11259	Homo sapiens filamin A interacting protein 1-like (FILIP1L), transcript variant 3, mRNA,	chr3	101049949	101049998	ATGCAAGCTGTAGCCAGCCCTGTGAGACCTGCCAGCCCTTCAGCACCACT
2480440	0.000369217	1.707e-05	2.61184	1.38507	up	C3orf64	285203	Homo sapiens chromosome 3 open reading frame 64 (C3orf64), mRNA,	chr3	69107396	69107445	GGGATGACAAAAGCATGTTGCGCTTTGCATCAGCAAGGCATTGACTTCTG
1500669	0.000279191	1.11593e-05	2.58592	1.37068	up	MYO1B	4430	Homo sapiens myosin IB (MYO1B), mRNA,	chr2	191997501	191997550	AGGCTTCAAGAAGGGCTGGTCCTAAGAGGGGGCAGAAATGAATGACCAGG
5560576	0.000279239	1.12072e-05	2.56894	1.36117	up	NEDD4	4734	Homo sapiens neural precursor cell expressed, developmentally down-regulated 4 (NEDD4), transcript variant 1, mRNA,	chr15	56119584	56119633	ACTGCCACCAGTCCCCAGCTGCAGACCTTCATCCCCTTCATCTCCCACTA
5220767	0.000138858	3.36615e-06	2.56633	1.35971	up	FLNB	2317	Homo sapiens filamin B, beta (actin binding protein 278) (FLNB), mRNA,	chr3	58132673	58132722	GAGGTGTAGGGAATTTTGCCTGCCTTCCTGCAGACCTGAGCTGGCTTTGG
780259	0.000794709	5.51126e-05	2.55072	1.35091	up	ZNHIT6	54680	Homo sapiens zinc finger, HIT type 6 (ZNHIT6), mRNA,	chr1	86119008	86119057	GTACAACGCACCGTCTAGCCACAGGAGAACTAATCTTCTATCAGTTGCCC
3120326	0.00050914	2.80699e-05	2.54228	1.34613	up	ANGPT1	284	Homo sapiens angiopoietin 1 (ANGPT1), mRNA,	chr8	108332585	108332634	ATTCTTGGTGGCTTCTTCATAGCAGGTAAGCCTCTCCTTCTAAAAACTTC
4010445	0.000634607	3.95156e-05	2.53584	1.34246	up	SFRS2IP	9169	Homo sapiens splicing factor, arginine/serine-rich 2, interacting protein (SFRS2IP), mRNA,	chr12	46316835	46316884	CTGCTCCGACAGCAGCCCCAGGAAATACGGGAATGGTTCAGGGACCAAGT
620180	0.000317763	1.37335e-05	2.52097	1.33398	up	STAG2	10735	Homo sapiens stromal antigen 2 (STAG2), transcript variant 2, mRNA,	chrX	123063382	123063431	GTGGCTACTTGCCATTTTGACATCAACTCATTTTGCGAGGCTTAGGCAGC
1340360	0.000136402	3.26198e-06	2.52032	1.33361	up	RCC2	55920	Homo sapiens regulator of chromosome condensation 2 (RCC2), mRNA,	chr1	17605960	17606009	GTTGGGAATGTGCTTGGCGCTGACCCTGCGGGCATCTGACTGGTCTTCCA
2710017	0.00026508	1.00335e-05	2.51626	1.33128	up	KIF5B	3799	Homo sapiens kinesin family member 5B (KIF5B), mRNA,	chr10	32340281	32340330	CCTGGCCTGTACAGCTGTTTCCTACCTACTCTTCTTGTAAACTCTGCTGC
3610672	0.00427507	0.000625384	2.49731	1.32037	up	DSP	1832	Homo sapiens desmoplakin (DSP), transcript variant 2, mRNA,	chr6	7531020	7531069	CAGTGGGTCCCGGAGAGGAAGCTTTGACGCCACAGGGAATTCTTCCTACT
770221	0.00015512	4.1138e-06	2.48967	1.31595	up	C20orf177	63939	Homo sapiens chromosome 20 open reading frame 177 (C20orf177), mRNA,	chr20	57955529	57955578	GCTGAGTTGCTGCCTTTCCCCGTCATGTATCCATGTGCATGCTCTTAGAG
1470551	0.00108039	8.54581e-05	2.48757	1.31473	up	SEL1L3	23231	Homo sapiens sel-1 suppressor of lin-12-like 3 (C, elegans) (SEL1L3), mRNA,	chr4	25749246	25749295	GCAGCAAGTAAGCCTCTAGCTTATAGTTTCATCCCTACCCCTCATGCCTG
4060068	0.000438964	2.24268e-05	2.479	1.30976	up	PDIA4	9601	Homo sapiens protein disulfide isomerase family A, member 4 (PDIA4), mRNA,	chr7	148331345	148331394	TCTGATTGCTTCCTGTTGAGCACAAAGTGAGAGCTGCCACTGAGCAGCCC
270524	0.00010625	2.20372e-06	2.4762	1.30813	up	P15RS	55197	Homo sapiens hypothetical protein FLJ10656 (P15RS), mRNA,	chr18	31823897	31823946	GTTGCCAACTGTTGTTCCAGCCATCCACACAGGAGTCTGTTCTGAGGTGG
1430735	0.00026508	1.00846e-05	2.46138	1.29947	up	NET1	10276	Homo sapiens neuroepithelial cell transforming 1 (NET1), transcript variant 1, mRNA,	chr10	5489634	5489683	GGGCGTGTAGTAAGTTGTAGAAGGCTCGAGGGGACGTGGACTTATTTGCC
1980309	0.00302964	0.000381968	2.45088	1.2933	up	IL8	3576	Homo sapiens interleukin 8 (IL8), mRNA,	chr4	74609125	74609174	CCCAGTCTTGTCATTGCCAGCTGTGTTGGTAGTGCTGTGTTGAATTACGG
2760719	0.000381897	1.78603e-05	2.45015	1.29287	up	LOC100130919	100130919	PREDICTED: Homo sapiens hypothetical protein LOC100130919 (LOC100130919), mRNA,	chrX	99080033	99080082	TGGGAACGTGCTTGGCGCGACCCTGCGGGCATCTGACTGGTCTTCCAGCT
3940044	0.00252348	0.000294809	2.43537	1.28414	up	MARCH4	57574	Homo sapiens membrane-associated ring finger (C3HC4) 4 (MARCH4), mRNA,	chr2	216830970	216831019	CCTGCCAGGGAAGGCCACTGGGTGTTCACCTGCAAAGTTTCTGGTTGTCA
460338	0.000689732	4.47205e-05	2.43424	1.28347	up	PLOD2	5352	Homo sapiens procollagen-lysine, 2-oxoglutarate 5-dioxygenase 2 (PLOD2), transcript variant 1, mRNA,	chr3	147278341	147278390	GGGAAAAAGACTCCCCTACTCCGGAAACATTCCAAATGCTCAGCCCCCCA
2450114	0.000169686	4.89716e-06	2.43339	1.28297	up			Homo sapiens cDNA FLJ32401 fis, clone SKMUS2000339	chr1	212589151	212589200	ATTCCAGGTTGGGACTTGGGATCCTGAGAGCACATTCGCCCCCTGTGGTG
2320575	0.00368875	0.000504955	2.43107	1.28159	up	TSPAN2	10100	Homo sapiens tetraspanin 2 (TSPAN2), mRNA,	chr1	115392762	115392811	CTCTCTGCCTGAAGACAGGAAACAGGCCCAAGTGCATACTCGGGTTCTTT
6450669	0.00158524	0.000152595	2.42879	1.28024	up	ANLN	54443	Homo sapiens anillin, actin binding protein (ANLN), mRNA,	chr7	36446055	36446104	TCAGAAAAGTGATGTGGACATAGGAGGCAATGTGTGAGACTTGGGGGTTC
1710736	2.24313e-05	8.66872e-08	2.42378	1.27726	up	DOCK10	55619	Homo sapiens dedicator of cytokinesis 10 (DOCK10), mRNA,	chr2	225630133	225630182	CCCTAAGTTTGCTGTCAGTTATTGTATGGTCAGTACCCCAGTCCTAGTAC
4150240	0.000566955	3.33479e-05	2.41458	1.27177	up	YTHDF3	253943	Homo sapiens YTH domain family, member 3 (YTHDF3), mRNA,	chr8	64124595	64124644	GGGGACCAAAAGGGAGAGAGCCTGGGGTCTACAAGAGGAGACACATCATC
6520066	0.00122999	0.000103402	2.41285	1.27074	up	VAMP7	6845	Homo sapiens vesicle-associated membrane protein 7 (VAMP7), mRNA,	chrXY	57685399	57685448	GGCTCATGGTACCTGTTCTTCTATCCAAACCTTTCAATTCATGCTACCTG
650458	0.000142303	3.57713e-06	2.41238	1.27046	up	FILIP1L	11259	Homo sapiens filamin A interacting protein 1-like (FILIP1L), transcript variant 1, mRNA,	chr3	101050072	101050121	GCGATATTCAGAGTCTCCCCAGACCGGCAGTCATCATGGCAGTTTCAGCG
5960398	0.017292	0.00430875	2.39961	1.2628	up	NT5E	4907	Homo sapiens 5'-nucleotidase, ecto (CD73) (NT5E), mRNA,	chr6	86261733	86261782	GCCCAAAGAACAAATACTTAACGTGGGAGTGGAACCACATGAGCCTGCTC
3400612	0.000583049	3.4889e-05	2.38993	1.25697	up	WDFY1	57590	Homo sapiens WD repeat and FYVE domain containing 1 (WDFY1), mRNA,	chr2	224740138	224740187	GATATGGTGCCCTGTGTATCCCAGAGATGCTAGAAAACTGTTCTTTGCTC
4860066	0.000692706	4.49934e-05	2.37773	1.24958	up	LOC647346	647346	PREDICTED: Homo sapiens similar to Alcohol dehydrogenase class 3 chi chain (Alcohol dehydrogenase class III chi chain) (S-(hydroxymethyl)glutathione dehydrogenase) (Glutathione-dependent formaldehyde dehydrogenase) (FDH), transcript variant 1 (LOC647346), mRNA,				ATTCATCTGTTCTCCAGTTGAAGGCATGAAGTTGTTGCCAGTTTCTGTAT
4780086	0.00184914	0.00019006	2.37096	1.24547	up	CRK	1398	Homo sapiens v-crk sarcoma virus CT10 oncogene homolog (avian) (CRK), transcript variant II, mRNA,	chr17	1325938	1325987	CCTAACTAATGGGATCCAGCAGGGCCATTTCTCCAGAGGGCCAGTATCCT
2680722	0.0048391	0.000742775	2.36806	1.2437	up	HIF1A	3091	Homo sapiens hypoxia-inducible factor 1, alpha subunit (basic helix-loop-helix transcription factor) (HIF1A), transcript variant 2, mRNA,	chr14	61284383	61284432	CCTAAATGTTCTGCCTACCCTGTTGGTATAAAGATATTTTGAGCAGACTG
3990674	0.000107689	2.26653e-06	2.36198	1.24	up	SSFA2	6744	Homo sapiens sperm specific antigen 2 (SSFA2), mRNA,	chr2	182495136	182495185	GTGGCAAGGAAGAAAGTGTTCCGAGCATCGGTGGCTCTAACGCCAACAGC
1170445	0.00221896	0.000244514	2.35792	1.23751	up	CADM1	23705	Homo sapiens cell adhesion molecule 1 (CADM1), transcript variant 1, mRNA,	chr11	115045088	115045137	CTGCAGCTCTATTCCGAGCCCTTAGCACCCATTCCGACCATAGTATAATC
4290279	0.000790843	5.45582e-05	2.35492	1.23568	up	ACLY	47	Homo sapiens ATP citrate lyase (ACLY), transcript variant 1, mRNA,	chr17	40023728	40023777	CTGTCAGGATGGGGTCTTCCTCATTGTAGGGCGTTAGGATGTTGCTTTCT
2810615	0.000439253	2.24727e-05	2.34851	1.23175	up	GRB10	2887	Homo sapiens growth factor receptor-bound protein 10 (GRB10), transcript variant 4, mRNA,	chr7	50625509	50625558	TACCTGACAGTATGACCGATCTCTGCGCCTTTCTGGGGGCGGGCAAGCTG
4200504	0.000103993	2.13466e-06	2.34618	1.23031	up	MET	4233	Homo sapiens met proto-oncogene (hepatocyte growth factor receptor) (MET), transcript variant 2, mRNA,	chr7	116225375	116225424	GTCTCTACCAGGGTCAAGAGCATGAACGCATCAATAGAAAGAACTCGGGG
4390703	0.000231512	8.05344e-06	2.3424	1.22799	up	PTPN1	5770	Homo sapiens protein tyrosine phosphatase, non-receptor type 1 (PTPN1), mRNA,	chr20	48634193	48634242	ACCCTGCAGAGCTATGGTGAGGTGTGGATAAGGCTTAGGTGCCAGGCTGT
1450524	0.000435494	2.20643e-05	2.34217	1.22785	up	NUP205	23165	Homo sapiens nucleoporin 205kDa (NUP205), mRNA,	chr7	134983805	134983854	CAGACGTATCCGTGGCCTCTTGAGGATATCAAGGAACTGAGAGCCCGTGC
1170072	0.0056974	0.000935461	2.33512	1.2235	up	ZSWIM4	65249	Homo sapiens zinc finger, SWIM-type containing 4 (ZSWIM4), mRNA,	chr19	13803992	13804041	GAGACTGGGGTGCATCTCCAGAGCCACTCACACCCTCAACCTCGTTTCCT
2600291	0.00270404	0.000325482	2.32341	1.21625	up	MTAP	4507	Homo sapiens methylthioadenosine phosphorylase (MTAP), mRNA,	chr9	21855130	21855179	AGCTGTTTCAGGGCCTGTTGCCAGCTATGCCTTTGAGAACCTCGGGATCC
460711	0.00135493	0.000120337	2.31543	1.21128	up	BAT2D1	23215	Homo sapiens BAT2 domain containing 1 (BAT2D1), mRNA,	chr1	169828575	169828624	CAGAGCTGTGTCATGCCATCCTTTGGGCCCTCTGCTGGAAAAGTAGAATC
1580520	0.0197123	0.00513758	2.31222	1.20928	up	PTPN13	5783	Homo sapiens protein tyrosine phosphatase, non-receptor type 13 (APO-1/CD95 (Fas)-associated phosphatase) (PTPN13), transcript variant 3, mRNA,	chr4	87949947	87949996	CCAGAGAGGTGCGCCATATTTCTCATCTGAATTTCACTGCCTGGCCAGAC
3460707	0.00186792	0.000192587	2.30361	1.20389	up	STMN1	3925	Homo sapiens stathmin 1 (STMN1), transcript variant 1, mRNA,	chr1	26226891	26226940	CCGCACGTTCTCTGCCCCGTTTCTTGCCCCAGTGTGGTTTGCATTGTCTC
4860468	0.00127166	0.000109431	2.29911	1.20107	up	ARL1	400	Homo sapiens ADP-ribosylation factor-like 1 (ARL1), mRNA,	chr12	101787313	101787362	GGTCCTTGTCTAGCAGGAGACAACTGCACAGGTATACTACCAGCGTTTGG
6290112	0.000344878	1.54434e-05	2.28903	1.19474	up	SRPR	6734	Homo sapiens signal recognition particle receptor (docking protein) (SRPR), mRNA,	chr11	126133104	126133153	TCTTGGCCTCCCAACTCTTCCCACTCCCAGAATCCAGAAGTAAGCTCTGC
70088	0.00349692	0.0004674	2.28706	1.19349	up	SGCD	6444	Homo sapiens sarcoglycan, delta (35kDa dystrophin-associated glycoprotein) (SGCD), transcript variant 1, mRNA,	chr5	156125319	156125368	CCTAGAAAATGGCAGAGCTGGAATGTAGGTTTAACTCCTGACCACTATGC
3060609	0.0172181	0.00428301	2.27987	1.18895	up	PTPN13	5783	Homo sapiens protein tyrosine phosphatase, non-receptor type 13 (APO-1/CD95 (Fas)-associated phosphatase) (PTPN13), transcript variant 3, mRNA,	chr4	87954671	87954720	CCTGACACGTCTTCAAGCAGAAGAAGAGCAAAAACAGCAGCCTCAGCTTC
1570114	0.000785199	5.3952e-05	2.27927	1.18857	up			Homo sapiens mRNA; cDNA DKFZp686J0156 (from clone DKFZp686J0156)	chr10	117806715	117806764	GGCTTCGGGCGGGTCTCCATGTTATATTGTGTGTTTACTGAGCTTCCCAC
2350703	0.000791155	5.46255e-05	2.27854	1.18811	up	STX3	6809	Homo sapiens syntaxin 3 (STX3), mRNA,	chr11	59326495	59326544	GGCCGGTCACAATCCAGCACTCAGACAGAGCCAAGGCAATATCCTCTTGC
5290592	0.0048391	0.000742232	2.27518	1.18598	up	NRBF2	29982	Homo sapiens nuclear receptor binding factor 2 (NRBF2), mRNA,	chr10	64584374	64584423	TGGTGGCCGGAGGGGCTGCCTTATATTTGAAACATGCTTTCTATCATGCA
5340768	0.00035661	1.62975e-05	2.27384	1.18513	up	NGRN	51335	Homo sapiens neugrin, neurite outgrowth associated (NGRN), transcript variant 1, mRNA,	chr15	88610472	88610521	ACATCCATTCTGCTTCCACGCATGGCTTCTGCCATTGGTTCTCTTCCCCC
6110279	0.00015675	4.17925e-06	2.2726	1.18434	up	NET1	10276	Homo sapiens neuroepithelial cell transforming 1 (NET1), transcript variant 2, mRNA,	chr10	5488103	5488152	ACGGAACGAACGGCACTCTTACCAGGTTTACCGGCAGCCAATCCCAGTCC
7510681	0.000512117	2.83611e-05	2.26199	1.17759	up	SLC25A24	29957	Homo sapiens solute carrier family 25 (mitochondrial carrier; phosphate carrier), member 24 (SLC25A24), nuclear gene encoding mitochondrial protein, transcript variant 1, mRNA,	chr1	108681744	108681793	GATTCTGTAAACCCTGGAGTCATGGTGTTGCTGGGATGCGGTGCCTTATC
6200369	0.0029332	0.00036513	2.26162	1.17736	up	PPP1CB	5500	Homo sapiens protein phosphatase 1, catalytic subunit, beta isoform (PPP1CB), transcript variant 3, mRNA,	chr2	28878805	28878854	GCTGCCCCTGAGAAGAGACTTAATCCAAGCCTGATTGTACTAGTGGCATC
1070450	0.000100167	1.99153e-06	2.25935	1.17591	up	PTGS1	5742	Homo sapiens prostaglandin-endoperoxide synthase 1 (prostaglandin G/H synthase and cyclooxygenase) (PTGS1), transcript variant 2, mRNA,	chr9	124197604	124197653	GGGTGAGCTGCACCTGATTAGTTGAAAGGCCTCAAGAACAAACACTGCAG
670025	0.000886648	6.41605e-05	2.25635	1.17399	up	CORO1C	23603	Homo sapiens coronin, actin binding protein, 1C (CORO1C), transcript variant 1, mRNA,	chr12	109039125	109039174	CCGTAGGGCATGTGGTTCAAAGAGAAGCAGGAGGGCAAGGGAAAGTTACC
5720161	0.000613646	3.77477e-05	2.25398	1.17248	up	ADH5	128	Homo sapiens alcohol dehydrogenase 5 (class III), chi polypeptide (ADH5), mRNA,	chr4	100212201	100212250	GGGAAAGGAAGCAGGGCAGTGGTGGGTGTCTGAAACCTCAGAAACATAAC
2230615	0.00519457	0.000823448	2.2537	1.17229	up	WSB1	26118	Homo sapiens WD repeat and SOCS box-containing 1 (WSB1), transcript variant 2, mRNA,	chr17	22663930	22663979	CTTACGAAAGTTGAATTGGGTGAGGCGGGCAAATCACCTGAGGTCAGCAG
7040397	0.00110165	8.78037e-05	2.24831	1.16884	up	PRRC1	133619	Homo sapiens proline-rich coiled-coil 1 (PRRC1), mRNA,	chr5	126918169	126918218	CCCTAGACCTAAACTGTGTCACAGACTTCTGAATGTTTAGGCAGTGCTAG
7320386	0.000383423	1.8018e-05	2.24573	1.16718	up	TTL	150465	Homo sapiens tubulin tyrosine ligase (TTL), mRNA,	chr2	113006190	113006239	GTGTTTTCATTCACAGTGGAGGCTACATCAAGCAAGGGGAGGTCCAGCCC
7400372	0.0029052	0.00035979	2.23931	1.16306	up	WSB1	26118	Homo sapiens WD repeat and SOCS box-containing 1 (WSB1), transcript variant 3, mRNA,	chr17	22659729	22659778	TGCTTGCAGTATCTGTTTCTCTTCCTAGGCTCAAGTTGGTGACCCAAGCC
6840035	0.00993039	0.00202093	2.23851	1.16254	up	GBP1	2633	Homo sapiens guanylate binding protein 1, interferon-inducible, 67kDa (GBP1), mRNA,	chr1	89291243	89291292	GCATTGGTCTGGCCAAGTCTACAATGTCCCAATATCAAGGACAACCACCC
3710044	0.00233503	0.000263762	2.23774	1.16204	up	PLAT	5327	Homo sapiens plasminogen activator, tissue (PLAT), transcript variant 1, mRNA,	chr8	42152339	42152388	CATGCCACCCTGTTTTCAGCTAAAGCCCAACCTCCTGACCTGTCACCGTG
7400546	0.000383524	1.81048e-05	2.23752	1.1619	up	PPP3CB	5532	Homo sapiens protein phosphatase 3 (formerly 2B), catalytic subunit, beta isoform (PPP3CB), mRNA,	chr10	74866705	74866754	TTGGTGGCCTGCTTCCCTCATGCCCTGGAATACAACTCAGAGCTCCAGGC
510246	0.014163	0.0032775	2.22659	1.15484	up	POSTN	10631	Homo sapiens periostin, osteoblast specific factor (POSTN), mRNA,	chr13	37035105	37035154	TCAAATCGAAGAGTTGTGAACTGTTATCCCATTGAAAAGACCGAGCCTTG
4830575	0.0110561	0.00232961	2.2204	1.15082	up	CCDC80	151887	Homo sapiens coiled-coil domain containing 80 (CCDC80), transcript variant 1, mRNA,	chr3	113806231	113806280	GGCACTGCAGCCAAAGGCGATACTTCCAGAGTTCTAGTAGGCTGCTATGG
7610598	0.0116378	0.00250622	2.21645	1.14825	up	TRAF5	7188	Homo sapiens TNF receptor-associated factor 5 (TRAF5), transcript variant 1, mRNA,	chr1	209614651	209614700	CATATCCAAGTTCACTCTGTCTTCCTGAGCAGTGGAAGATCATATTGCTG
4670059	6.55412e-05	8.34224e-07	2.21038	1.14429	up	ZAK	51776	Homo sapiens sterile alpha motif and leucine zipper containing kinase AZK (ZAK), transcript variant 2, mRNA,	chr2	173799586	173799635	CTCCACCTTTGTTTGCACTCTGTTGCCTGTGAGGAGCTTTCTGGCATGTG
6550603	0.000781571	5.35088e-05	2.20837	1.14298	up	HMGCR	3156	Homo sapiens 3-hydroxy-3-methylglutaryl-Coenzyme A reductase (HMGCR), mRNA,	chr5	74693189	74693238	CTTGGATGGACCCACGAACGCTCTTAGCTTTCTCAGGGGGTCAGCAGAGT
2970364	0.00322381	0.000418563	2.20565	1.1412	up	BMPER	168667	Homo sapiens BMP binding endothelial regulator (BMPER), mRNA,	chr7	34193393	34193442	GGAGATTGGTGACCGGCCCTAATGGTGCATGAAAAGCGAGTGATAGGCTG
2630563	0.000168382	4.80959e-06	2.19547	1.13453	up	SLC39A14	23516	Homo sapiens solute carrier family 39 (zinc transporter), member 14 (SLC39A14), mRNA,	chr8	22335693	22335742	TGTCACGTGCAGGAACAGTGAGGCAGGGACAGGGGTTCTGCTCCTTCTCA
6480630	0.0014112	0.000127085	2.194	1.13356	up	ATP9A	10079	Homo sapiens ATPase, class II, type 9A (ATP9A), mRNA,	chr20	50213337	50213386	CTGAGCGACTCTACTTTCATTGTTTGCCAGCGTGGCTCGTTGCTGTTGCC
2710730	0.000262299	9.82052e-06	2.19117	1.1317	up	PLS3	5358	Homo sapiens plastin 3 (T isoform) (PLS3), mRNA,	chrX	114790993	114791042	GAGGAGAGAGTGTGCTCAGAACTTAGACGGGATTTGGTAGGCCAAGTATG
3460386	0.00330347	0.000433474	2.18805	1.12965	up	B4GALT1	2683	Homo sapiens UDP-Gal:betaGlcNAc beta 1,4- galactosyltransferase, polypeptide 1 (B4GALT1), mRNA,	chr9	33100888	33100937	TGGCCTTTGGGAAAGATCAGAGAGGCAGAGGTGGCACAGGACAGTAAAGG
5420309	0.0122412	0.00267785	2.18676	1.1288	up	AURKA	6790	Homo sapiens aurora kinase A (AURKA), transcript variant 3, mRNA,	chr20	54944646	54944695	TCCTTTAGGAATGCTGTGTGTCTGTCCGGCACCCCGGTAGGCCTGATTGG
2600747	0.0170986	0.00423995	2.18623	1.12844	up	IFIT2	3433	Homo sapiens interferon-induced protein with tetratricopeptide repeats 2 (IFIT2), mRNA,	chr10	91058378	91058427	GCTGACCCAGCATCAGCCACACTCTGGGTTGGAAAATGTTTGCCTGTTGG
2100368	0.00243651	0.000281358	2.1841	1.12704	up	GOLT1B	51026	Homo sapiens golgi transport 1 homolog B (S, cerevisiae) (GOLT1B), mRNA,	chr12	21561883	21561932	GGGTTTGATAATCTCCCAGTCCTTAGTAAAGATTGAGAGAGGCTGGAGCA
3360689	0.000853796	6.10568e-05	2.18354	1.12667	up	ILF3	3609	Homo sapiens interleukin enhancer binding factor 3, 90kDa (ILF3), transcript variant 2, mRNA,	chr19	10656226	10656275	CTGTGCTTCACTGGGTTTCTCAACCGTGGCTTTTCACCGCAGCTTGTCTG
6660709	0.000201907	6.49996e-06	2.18029	1.12452	up	TTC37	9652	Homo sapiens tetratricopeptide repeat domain 37 (TTC37), mRNA,	chr5	94864405	94864454	GGGCAAGAGAGACACGGCGTCTTTTGGAAAGAGTGGTATATCAGCCTGGG
3930452	0.00075223	5.08365e-05	2.17856	1.12338	up	CDC2L6	23097	Homo sapiens cell division cycle 2-like 6 (CDK8-like) (CDC2L6), mRNA,	chr6	111038242	111038291	CAGGACGAGCTACTGCTTTGGAGCGAGGGTTTCCTGCTTTTGAGTTGACC
5860463	0.000295299	1.22111e-05	2.17629	1.12187	up	NEK6	10783	Homo sapiens NIMA (never in mitosis gene a)-related kinase 6 (NEK6), mRNA,	chr9	126154389	126154438	GGGCGGCTGCTGTTTCCACACGTGGACTCGGATCTGCTGTGACACCGTCA
2940730	0.000163002	4.51133e-06	2.17516	1.12112	up	ADAM9	8754	Homo sapiens ADAM metallopeptidase domain 9 (meltrin gamma) (ADAM9), transcript variant 1, mRNA,	chr8	38899572	38899621	GTGCTCCCTCCTGTGGTAATAAGTTGGTGGACGCTGGGGAAGAGTGTGAC
3310672	0.000140215	3.487e-06	2.17442	1.12063	up	CLIP4	79745	Homo sapiens CAP-GLY domain containing linker protein family, member 4 (CLIP4), mRNA,	chr2	29258931	29258980	GCTAAGAATAGACTGTGGGTCTCCTCACTTGTGGCCCAGTGCTCTTTCTG
4060021	0.0027404	0.000331608	2.16807	1.11641	up	SLK	9748	Homo sapiens STE20-like kinase (yeast) (SLK), mRNA,	chr10	105763023	105763072	CTGAGACAGCACATTTGTGAATGATGCTTGCTGCCTGCCATTTTCAACCT
2190326	0.0232976	0.00642802	2.16288	1.11295	up	DIO2	1734	Homo sapiens deiodinase, iodothyronine, type II (DIO2), transcript variant 3, mRNA,	chr14	80664173	80664222	CGCCCGAAGAGGGAGACAGAGATGTGCAGAGTTGACCAGTGTGCGGATGA
1820750	0.00436531	0.000642827	2.15661	1.10877	up	STAT1	6772	Homo sapiens signal transducer and activator of transcription 1, 91kDa (STAT1), transcript variant alpha, mRNA,	chr2	191548824	191549825	TACTCCAGGCCAAAGGAAGCACCAGAGCCAATGGAACTTGATGGCCCTAA
2710195	0.00194052	0.000202893	2.15546	1.108	up	TARS	6897	Homo sapiens threonyl-tRNA synthetase (TARS), mRNA,	chr5	33467825	33467874	CCCAGATTGGCTCCATGGAAAAGGAGGAACAGCGTTTCCGTAAAATTGAC
4120278	0.00351095	0.00046986	2.15455	1.10738	up	KIF23	9493	Homo sapiens kinesin family member 23 (KIF23), transcript variant 2, mRNA,	chr15	67526297	67527196	CAGCTGGGACCTGGATATCAGCATCACGCACAACCCAAGCGCAAAAAGCC
5130164	6.62354e-05	8.50199e-07	2.15208	1.10573	up	RASA1	5921	Homo sapiens RAS p21 protein activator (GTPase activating protein) 1 (RASA1), transcript variant 1, mRNA,	chr5	86680799	86680848	GTGCTACCCCTTTGATTATGCAGACAACCTCATCAGCTGCCTAACTTATC
7400368	0.00715961	0.00129231	2.14989	1.10426	up	RUNX1	861	Homo sapiens runt-related transcription factor 1 (acute myeloid leukemia 1; aml1 oncogene) (RUNX1), transcript variant 1, mRNA,	chr21	35082209	35082258	CTTCAGCCAGATGACATGAGAGAATATCCCAGAACCCTCTCTCCAAGGTG
2680497	0.000121286	2.71339e-06	2.14984	1.10423	up	NCAPD2	9918	Homo sapiens non-SMC condensin I complex, subunit D2 (NCAPD2), mRNA,	chr12	6510846	6510895	GATCCTAGGAAGTCTGTTCCTGTCCTCCCTGTGCAGGGTATCCTGTAGGG
6900725	0.00396788	0.000561173	2.14928	1.10386	up	DHX9	1660	Homo sapiens DEAH (Asp-Glu-Ala-His) box polypeptide 9 (DHX9), mRNA,	chr1	181116288	181116337	CTCCTTTGGGACGAATCCTGGCTAAACTCCCCATTGAGCCTCGTTTTGGC
540082	0.000484308	2.59626e-05	2.14871	1.10347	up	TBL1XR1	79718	Homo sapiens transducin (beta)-like 1X-linked receptor 1 (TBL1XR1), mRNA,	chr3	178222096	178222145	TCCCCCTTCTCCTGAATCAGCAGGGATGGAAGGAGGGTAGGGAAGTTATG
5890279	0.00834584	0.0015949	2.14125	1.09845	up	COL4A2	1284	Homo sapiens collagen, type IV, alpha 2 (COL4A2), mRNA,	chr13	109962873	109962922	TTCAACTCCCTTCTCGGGGTGGGACAGACGAGACAACAGCACACAGGCAG
5900152	0.00327248	0.000428016	2.13771	1.09607	up	NOX4	50507	Homo sapiens NADPH oxidase 4 (NOX4), mRNA,	chr11	88699220	88699269	TGAGGAGCTGAACTTGCTCAATCTAAGGCTGATTGTCGTGTTCCTCTTTA
5560739	0.00191868	0.000199678	2.13137	1.09178	up	COL11A1	1301	Homo sapiens collagen, type XI, alpha 1 (COL11A1), transcript variant B, mRNA,	chr1	103343309	103343358	TCTGGAAGACTTTTGGAAGCACACTCTGATCAACTCTTCTCTGCCGACAG
6590349	0.000554868	3.21112e-05	2.13016	1.09096	up	LOC100129034	100129034	PREDICTED: Homo sapiens hypothetical protein LOC100129034 (LOC100129034), mRNA,				CGCGACCCTGCGGGCAGCGCTTAGGACTGCACATTTACATTTCCCAAATG
6480577	0.000313505	1.34828e-05	2.13001	1.09086	up	SR140	23350	Homo sapiens U2-associated SR140 protein (SR140), mRNA,	chr3	142773804	142773853	TCCCCCAGCCCATCTCGCAGTAGCAGTGGTAGACGAGTGAAATCCCCATC
3360431	0.000910931	6.70363e-05	2.12908	1.09023	up	ZAK	51776	Homo sapiens sterile alpha motif and leucine zipper containing kinase AZK (ZAK), transcript variant 1, mRNA,	chr2	173790175	173790224	GACGTTTAAAGATGTGGGAGCAAAAGCTGACAGAGCAGTCCAACACCCCG
1240379	0.0342158	0.0107118	2.12722	1.08897	up	ALDH1B1	219	Homo sapiens aldehyde dehydrogenase 1 family, member B1 (ALDH1B1), nuclear gene encoding mitochondrial protein, mRNA,	chr9	38388151	38388200	GGATAGAGGAGTAATTGTTAGTGGGCATGGGATTTGTTTTTGGGAGGTTT
290475	0.00912013	0.00180038	2.12308	1.08616	up	CTNNAL1	8727	Homo sapiens catenin (cadherin-associated protein), alpha-like 1 (CTNNAL1), mRNA,	chr9	111714561	111714610	GCTGGGTTTGCTCACCTCTGACGCTGACTGCGAAATTGAGAAGTGGGAAG
3120402	0.000697716	4.54177e-05	2.12289	1.08603	up	SLC30A7	148867	Homo sapiens solute carrier family 30 (zinc transporter), member 7 (SLC30A7), mRNA,	chr1	101217499	101217548	CCCCCAGAAGCCTTAGTGACCCAGATCTCAACCAGAGACTCAAGATAGCC
1410358	0.00422751	0.000614978	2.11976	1.0839	up	SH3RF1	57630	Homo sapiens SH3 domain containing ring finger 1 (SH3RF1), mRNA,	chr4	170252715	170252764	CGCAGTCATGGATCTGGGTAGTCCGGAAAACAAAAGGAGGGAAGACAGCC
6550170	0.000179129	5.45549e-06	2.11907	1.08343	up	KLHL9	55958	Homo sapiens kelch-like 9 (Drosophila) (KLHL9), mRNA,	chr9	21331364	21331413	GGAACCAAGGCAAAATGAATTGGCTTCTAGGGGTCTGAACCTTACTGCCC
2750598	0.000656014	4.17262e-05	2.11562	1.08108	up	ANKRD46	157567	Homo sapiens ankyrin repeat domain 46 (ANKRD46), mRNA,	chr8	101602463	101602512	CCTGAGTAACTGGCTGCTTCAGGATCAGCTTGCAGAGTCTTGCTTTTAGG
3130632	0.00255132	0.00029932	2.11467	1.08044	up	POLR2B	5431	Homo sapiens polymerase (RNA) II (DNA directed) polypeptide B, 140kDa (POLR2B), mRNA,	chr4	57585024	57585846	CTTCAAGGGAAGGTATCGGCTAACAAGGGTGAAATTGGTGATGCCACTCC
7330563	0.00276067	0.000334746	2.11422	1.08013	up	FAM178A	55719	Homo sapiens family with sequence similarity 178, member A (FAM178A), transcript variant 1, mRNA,	chr10	102699945	102700462	GGGGATGACTGTGGTGGTTTGTCGCTAAGGAGGCAACAGTAGGGTCCAGG
2480241	0.00104387	8.14537e-05	2.11315	1.0794	up	ATP6V1C1	528	Homo sapiens ATPase, H+ transporting, lysosomal 42kDa, V1 subunit C1 (ATP6V1C1), mRNA,	chr8	104085004	104085053	GAGTAAAGCCATGGAAGCCATGAACAGTAAGAGACTGCCGCCTGGCATGG
1690288	0.000213454	7.20831e-06	2.11291	1.07923	up	MYO9A	4649	Homo sapiens myosin IXA (MYO9A), mRNA,	chr15	69905755	69905804	CAGAAAGCCTGCTGGGGATGGTGCCAGCTGTGCCTTGGCTGTTGTATTTG
940722	0.0198686	0.00519592	2.11286	1.07919	up	CTNNAL1	8727	Homo sapiens catenin (cadherin-associated protein), alpha-like 1 (CTNNAL1), mRNA,	chr9	110745839	110745888	CTCCTGGAAATAAACAAGCTAATTCCTCTATGCCACCAGCTCCAGACAGT
2900731	0.00154215	0.000146478	2.11278	1.07914	up	PCSK7	9159	Homo sapiens proprotein convertase subtilisin/kexin type 7 (PCSK7), mRNA,	chr11	117075986	117076035	CACTGCCACTCCAGTCCTGCCACCACCCTGTCTTCCTCTGCAAGTGCTCA
160114	0.00407667	0.000584074	2.11271	1.07909	up	SMAP1	60682	Homo sapiens stromal membrane-associated protein 1 (SMAP1), mRNA,	chr6	71628034	71628083	CTCTTCCATATGGATCCACTGGCTGGACAAACTGCACCAGTTGCTGCTTC
3840131	0.000932785	6.96158e-05	2.10422	1.07329	up	NUP153	9972	Homo sapiens nucleoporin 153kDa (NUP153), mRNA,	chr6	17724007	17724056	CACTGATTTGACATAGTCTGGCTGTACCCAGGAATGGAGCCTGCACGGTG
5390164	0.000133576	3.13175e-06	2.10273	1.07226	up	FAT1	2195	Homo sapiens FAT tumor suppressor homolog 1 (Drosophila) (FAT1), mRNA,	chr4	187746527	187746576	CCCAACTACTGTCATCGTGAGGTTTTCATCGGCTGTGCCATTTCCCAACG
5690246	0.00276639	0.000335734	2.10058	1.07079	up	SPIRE1	56907	Homo sapiens spire homolog 1 (Drosophila) (SPIRE1), transcript variant 2, mRNA,	chr18	12448231	12448280	CTAGGCTTCCTGCGTGTGTAAAAGTCGAGGTATTGCTGGCATTCAGGGTG
5390661	0.00134491	0.000119208	2.09834	1.06925	up	VLDLR	7436	Homo sapiens very low density lipoprotein receptor (VLDLR), transcript variant 2, mRNA,	chr9	2638670	2638719	GAGGTCTAAACAAATAATACCCCCGTCGGAATGGTAACCGAGCCAGCAGC
5220433	9.94733e-05	1.95758e-06	2.09412	1.06634	up	DHX40	79665	Homo sapiens DEAH (Asp-Glu-Ala-His) box polypeptide 40 (DHX40), mRNA,	chr17	55040123	55040172	AGCGCCTCCACCTGGCCTACTCTGTTATTTCCACCTGTTTGGGTAGGGCC
3710386	0.000538507	3.07009e-05	2.09207	1.06493	up	2013-09-10	151011	Homo sapiens septin 10 (SEPT10), transcript variant 1, mRNA,	chr2	110301579	110301628	GCACTGACTTGACCCCACAAGTGGAAAATTCCCCACCCGACACCTTTGCT
2940095	0.000736566	4.91218e-05	2.09197	1.06486	up	SLC36A1	206358	Homo sapiens solute carrier family 36 (proton/amino acid symporter), member 1 (SLC36A1), mRNA,	chr5	150850807	150850856	GGCCAGAGGACATAAATGGTGCTGGTAGGAGGTTATCAGAGTAAGGAAGG
1030674	0.000439253	2.24658e-05	2.09113	1.06429	up	STT3B	201595	Homo sapiens STT3, subunit of the oligosaccharyltransferase complex, homolog B (S, cerevisiae) (STT3B), mRNA,	chr3	31638331	31638617	GACTATTTTACCCCACAGGGAGAATTCCGTGTAGACAAAGCAGGATCCCC
2600706	9.10555e-05	1.64323e-06	2.08969	1.06329	up	RPRD1A	55197	Homo sapiens regulation of nuclear pre-mRNA domain containing 1A (RPRD1A), mRNA,	chr18	33570381	33570430	GCCAACCTCCCTGTCCAGATGCAGCTATTTTGGTATCTCCTATCACATGC
4590241	0.00127615	0.00011049	2.08757	1.06182	up	CNOT7	29883	Homo sapiens CCR4-NOT transcription complex, subunit 7 (CNOT7), transcript variant 1, mRNA,	chr8	17131890	17131939	AGTGTCTGTCAGTTTCTAATTGGCATGTGTAGGCTGCTCTGTGACTGAAG
2070437	0.00111523	8.94613e-05	2.08413	1.05945	up	LOC653631	653631	PREDICTED: Homo sapiens hypothetical LOC653631 (LOC653631), mRNA,	chr1	78048696	78048745	TGCTCCAATATGCTCTTTTGACTTAATGTCAAGCTTTGGGTTGATGTGGG
5960465	0.0051103	0.000800654	2.08233	1.0582	up	BUB3	9184	Homo sapiens BUB3 budding uninhibited by benzimidazoles 3 homolog (yeast) (BUB3), transcript variant 1, mRNA,	chr10	124914288	124914337	TGCACTAAAGCAGAACACGAACTTAGCTTGGCCTATTCTAGGTAGTTCCA
7550324	0.00349692	0.000467421	2.07848	1.05553	up	SHROOM2	357	Homo sapiens shroom family member 2 (SHROOM2), mRNA,	chrX	9866231	9866280	CCTGTCAGTTCCCCTGTTTGCCTCTGAAACGTCTGGTTAGTGGGGACCCA
1510072	0.000399838	1.92795e-05	2.07758	1.0549	up	PITRM1	10531	Homo sapiens pitrilysin metallopeptidase 1 (PITRM1), mRNA,	chr10	3190421	3190470	TCCTCGGACCCGAGAACCCGAAAATTGCCAAGGACCCATCCTGGATCATC
5550452	7.24388e-05	9.93931e-07	2.07635	1.05405	up	KCNMA1	3778	Homo sapiens potassium large conductance calcium-activated channel, subfamily M, alpha member 1 (KCNMA1), transcript variant 2, mRNA,	chr10	78314688	78314737	GGTTCTGCATGACCTAGCCACTGCTGGGGGTTTTCTTCTATAACGTTGTC
160019	0.0130822	0.00294343	2.06865	1.04869	up	SORT1	6272	Homo sapiens sortilin 1 (SORT1), mRNA,	chr1	109852530	109852579	GGTCCCCATGTGCCTGTTGTTCAGCCCTCTCTCTTGTTCCCTTTCTGAGC
3440133	0.00127633	0.00011055	2.06757	1.04793	up	RNF150	57484	Homo sapiens ring finger protein 150 (RNF150), mRNA,	chr4	142007352	142007401	GGAGGTCCTGCTGCAAACCCCCTGAGCCTTTGCCATTCACTACTTACCAA
4280482	0.000551011	3.16873e-05	2.06669	1.04732	up	DRAM1	55332	Homo sapiens DNA-damage regulated autophagy modulator 1 (DRAM1), mRNA,	chr12	100841204	100841253	CTTCTGCCTCACTTCGAGCAGACTTTTGTTCTCGGCGCTCCTCACGATGG
5720598	0.00530086	0.000845732	2.06558	1.04655	up	MYO1B	4430	Homo sapiens myosin IB (MYO1B), mRNA,	chr2	191997939	191997988	ACAGGGTGCCTATTTTAGTCATGGATCAAAATTTGTGTAACTTGCAGGGC
7200358	0.00270305	0.000325076	2.0652	1.04628	up	FNDC3A	22862	Homo sapiens fibronectin type III domain containing 3A (FNDC3A), transcript variant 1, mRNA,	chr13	48681292	48681341	GTGCCACATTTGGCAGTACAAATGAGTCTGAGTGTAATAGCCCAGAGATT
2760309	0.000583049	3.48531e-05	2.06397	1.04542	up			Homo sapiens mRNA; cDNA DKFZp779O0231 (from clone DKFZp779O0231)	chr3	190090691	190090740	AGCCCCACCGTGATGAGCTGCTAGTCTGAATAACGTTCCCTGACTTAGGG
2850059	0.00548721	0.000887137	2.05844	1.04155	up	CRY1	1407	Homo sapiens cryptochrome 1 (photolyase-like) (CRY1), mRNA,	chr12	105909326	105909375	GACCCAAACTTGTGGAAGTATCATGTGTTAAGTTCTCTGTCTCTGTTTCT
3390020	0.000785199	5.39401e-05	2.05825	1.04142	up	MBTPS1	8720	Homo sapiens membrane-bound transcription factor peptidase, site 1 (MBTPS1), mRNA,	chr16	84087749	84087798	CACCAAAGACTCGGGAGAACTGGAAAGGCTGTCTGGGGTCTTCTGACTGC
70504	0.0113744	0.00242353	2.05565	1.0396	up	GREM1	26585	Homo sapiens gremlin 1, cysteine knot superfamily, homolog (Xenopus laevis) (GREM1), mRNA,	chr15	30813973	30814022	CGGCAAAGAATTATATAGACTATGAGGTACCTTGCTGTGTAGGAGGATGA
3990594	0.000710075	4.64992e-05	2.05322	1.03789	up	COG3	83548	Homo sapiens component of oligomeric golgi complex 3 (COG3), mRNA,	chr13	45007688	45007737	TCCTCCTGAATGAAGGTTCAGGTCACCAGCCTTCTGTACACTGCCTTTGG
2810523	0.00321981	0.000417931	2.05319	1.03787	up	SSR3	6747	Homo sapiens signal sequence receptor, gamma (translocon-associated protein gamma) (SSR3), mRNA,	chr3	157741678	157741727	GCCACTAGATGGCAGTGCCTGTATAGATGGGGAAAAAATTGCCACCATTC
7040014	0.000389019	1.84406e-05	2.0531	1.0378	up	CRK	1398	Homo sapiens v-crk sarcoma virus CT10 oncogene homolog (avian) (CRK), transcript variant II, mRNA,	chr17	1339923	1339972	GCCAGGGTTATCCAGAAGCGAGTCCCCAATGCCTACGACAAGACAGCCTT
4250328	0.00805135	0.0015205	2.05295	1.0377	up	CHSY3	337876	Homo sapiens chondroitin sulfate synthase 3 (CHSY3), mRNA,	chr5	129520983	129521032	TGAGGAGTTTTGTTCCACAAGCAACCGGTACTGGCTACCCTGGTCTTATG
2470600	0.000629336	3.90699e-05	2.051	1.03633	up	KATNAL1	84056	Homo sapiens katanin p60 subunit A-like 1 (KATNAL1), transcript variant 2, mRNA,	chr13	30777013	30777062	TCATATGATGGTACGGCAGCAGGGAGTGGCCCCCAGTTAACATGGCTGTG
6560148	0.00413975	0.000597515	2.05055	1.03601	up	TCEB3	6924	Homo sapiens transcription elongation factor B (SIII), polypeptide 3 (110kDa, elongin A) (TCEB3), mRNA,	chr1	23958800	23958849	AACCTGCGTGCCACAGCCCCGCCTCCCTGCCTGGAGCACACTTTAGAATT
6400639	0.00104387	8.14592e-05	2.04985	1.03552	up	MGC18216	145815	PREDICTED: Homo sapiens hypothetical protein MGC18216 (MGC18216), mRNA,	chr15	97324631	97324680	GCCATGTCTCCCCAACTCCACAATATCTCTATCATGGGAAACACCTGGGG
1660113	9.00801e-05	1.59672e-06	2.04639	1.03308	up	FNDC3A	22862	Homo sapiens fibronectin type III domain containing 3A (FNDC3A), transcript variant 1, mRNA,	chr13	48681291	48681340	AGTGCCACATTTGGCAGTACAAATGAGTCTGAGTGTAATAGCCCAGAGAT
3930553	0.000472494	2.50314e-05	2.04532	1.03233	up	DDX10	1662	Homo sapiens DEAD (Asp-Glu-Ala-Asp) box polypeptide 10 (DDX10), mRNA,	chr11	108316549	108316598	CTCAGATCGAGGGTGGATGATACCATTTCCTGACCCCGTTTTCCAGCATG
7650020	0.000295299	1.22182e-05	2.04497	1.03208	up	AADACL1	57552	Homo sapiens arylacetamide deacetylase-like 1 (AADACL1), mRNA,	chr3	173831679	173831728	GGCAGGGTTCCTTCAATTGGCATTTTCCCCAGAATTGTGAGCCAAAGCCT
460220	0.00258182	0.000304821	2.04396	1.03137	up	ITGA1	3672	Homo sapiens integrin, alpha 1 (ITGA1), mRNA,	chr5	52235468	52235517	GTTGTCTCAACTCCTTGGTACAGGGTTCATTCAAACCCCCAAGCTGTGAG
4880750	0.000551978	3.18116e-05	2.04274	1.03051	up	SOCS5	9655	Homo sapiens suppressor of cytokine signaling 5 (SOCS5), transcript variant 2, mRNA,	chr2	46841593	46841642	GCCCAGGATGATTTTGTGAACCGTGAAGTACGTGAGACTAGAAGACGCCC
3170446	0.00113896	9.28372e-05	2.03914	1.02796	up	NUDT21	11051	Homo sapiens nudix (nucleoside diphosphate linked moiety X)-type motif 21 (NUDT21), mRNA,	chr16	56463745	56463794	ACTTGTTCAGTCACTTGAGATGAAATGCTTGGGGTAGCTTTTCCATCCTC
4150037	0.00073631	4.90786e-05	2.03718	1.02657	up	G3BP2	9908	Homo sapiens GTPase activating protein (SH3 domain) binding protein 2 (G3BP2), transcript variant 3, mRNA,	chr4	76787451	76787500	CCAATTCAGGATATTGCCCTGCCATCCATGAAAACTGTTCTGGCACCAAA
6960019	0.000358902	1.64786e-05	2.03676	1.02628	up	PAQR3	152559	Homo sapiens progestin and adipoQ receptor family member III (PAQR3), mRNA,	chr4	80058535	80058584	CTTCTGTATGTCAGTCAGCATTTAATGACCACCTACTGTGTGCACAGCAC
4590020	4.03979e-05	3.37505e-07	2.03098	1.02217	up	YOD1	55432	Homo sapiens YOD1 OTU deubiquinating enzyme 1 homolog (S, cerevisiae) (YOD1), mRNA,	chr1	207217681	207217730	CAGTTTTCCAGTCACATTGGTGCCATTCAGGACTCCAGCTGTTTACAGGA
2190148	0.00425808	0.000621992	2.02913	1.02086	up	GBP1	2633	Homo sapiens guanylate binding protein 1, interferon-inducible, 67kDa (GBP1), mRNA,	chr1	89291035	89291084	GTTCTCCAGAGGAAGGTGGAAGAAACCATGGGCAGGAGTAGGAATTGAGT
670470	0.00992413	0.00201931	2.02913	1.02086	up	SLK	9748	Homo sapiens STE20-like kinase (yeast) (SLK), mRNA,	chr10	105765349	105765398	AGCATAATTTACTTGGACAACTTCGTAGGTAGCCTTAACTTCTGGCCAAG
6060201	0.0012448	0.00010548	2.02892	1.02071	up	DDX18	8886	Homo sapiens DEAD (Asp-Glu-Ala-Asp) box polypeptide 18 (DDX18), mRNA,	chr2	118306098	118306147	GGACTTCCAACCTTGACTGCTGAGCTCCTGGCTTAGCTTCTTGGGTTCCT
730286	0.00470814	0.00071561	2.02865	1.02052	up	TXNRD1	7296	Homo sapiens thioredoxin reductase 1 (TXNRD1), transcript variant 5, mRNA,	chr12	103267749	103267798	AGGGAACCCATGCATCTGCCTGGCATTTAGGCAGCAGAGCCCCTGACCGT
3290079	0.00310893	0.000397561	2.02584	1.01852	up	HEATR5B	54497	Homo sapiens HEAT repeat containing 5B (HEATR5B), mRNA,	chr2	37208544	37208593	GCCCCTAATTAGTGATGGCCACTGTATCATTCCAGGCTACCTATGGGTTC
1990253	0.000425482	2.12251e-05	2.02494	1.01788	up	TDG	6996	Homo sapiens thymine-DNA glycosylase (TDG), mRNA,	chr12	102906409	102906458	TTTTGTGCGGGTGCTTTGAAGTGCCTTGCATCAGGGATTAGGAGCAATTA
2350333	0.00303899	0.000383686	2.02434	1.01745	up	TEX2	55852	Homo sapiens testis expressed 2 (TEX2), mRNA,	chr17	62224960	62225009	TTTCGTTGTGTAGGCCGATCTGCCTGTCAGAGTCCACGTGTCCTGGTCAC
360187	0.00376125	0.000518881	2.02312	1.01659	up	RIOK3	8780	Homo sapiens RIO kinase 3 (yeast) (RIOK3), transcript variant 1, mRNA,	chr18	19315329	19315378	AACCTGAGGAGTGGGCAATGGTGCTTCTGTGCTTTTCCCCCTTGTAACCC
5310114	0.00727104	0.00131603	2.023	1.0165	up	MBTPS1	8720	Homo sapiens membrane-bound transcription factor peptidase, site 1 (MBTPS1), mRNA,	chr16	84088185	84088234	GCTACAACCAGGAGGTGGGCCAGACCATTCCTGTCTTTGCCTTCCTGGGA
6520220	0.000175334	5.24044e-06	2.01736	1.01247	up	CAPRIN1	4076	Homo sapiens cell cycle associated protein 1 (CAPRIN1), transcript variant 1, mRNA,	chr11	34073400	34073998	CGGGGCCCTGCCAATGGATTCAGAGGAGGATATGATGGTTACCGCCCTTC
6650433	0.000499428	2.72158e-05	2.01479	1.01063	up	TLN1	7094	Homo sapiens talin 1 (TLN1), mRNA,	chr9	35687374	35687423	CTATCTTCCCCCACCCCCAGCTACCCATAGGGGCTGCAGAGTTATAAGCC
5960274	0.00197576	0.000207488	2.01059	1.00762	up	NCKAP1	10787	Homo sapiens NCK-associated protein 1 (NCKAP1), transcript variant 1, mRNA,	chr2	183793547	183793596	TTGCCTGCCTTCTCATGGTGTTTGTGGCAGTTTCTTTGCCAACACTGGCC
7200243	0.00347531	0.000463909	2.0091	1.00655	up	SERPINB7	8710	Homo sapiens serpin peptidase inhibitor, clade B (ovalbumin), member 7 (SERPINB7), transcript variant 1, mRNA,	chr18	59623082	59623131	GTCTTTCTTCCCACGCTCATTTCTATCATTCTCCCCCATGACCCGTCTGG
240333	0.0015976	0.000154321	2.00767	1.00552	up	ETS1	2113	Homo sapiens v-ets erythroblastosis virus E26 oncogene homolog 1 (avian) (ETS1), mRNA,	chr11	127834393	127834442	CCATCTCTCTTCTAGTCATGCTGTGCATGCCGCTTACTCTGTTGGGGTCT
6330195	0.00283168	0.000347781	2.00732	1.00527	up	EP400	57634	Homo sapiens E1A binding protein p400 (EP400), mRNA,	chr12	131130576	131130625	GCAGCCCGAACACTGTCAGACTCTAATTGGCGACCCTGGGAAACAGTTGC
4120243	0.0151764	0.00360294	2.00385	1.00278	up	PSG9	5678	Homo sapiens pregnancy specific beta-1-glycoprotein 9 (PSG9), mRNA,	chr19	48463849	48463898	TCCAACGCATCCCTGCTGATCCAGAATGTCACCCGGAAGGATGCAGGAAC
2360671	0.000853296	6.09908e-05	2.00357	1.00257	up	ANKLE2	23141	Homo sapiens ankyrin repeat and LEM domain containing 2 (ANKLE2), mRNA,	chr12	133302743	133302792	CCTGGAGGTCGGTTTCTTCCTGGGTGTTACGGGCAACTGCTCACACAGTT

## Sheet: miR103 vs neg1, 559 genes down
ProbeID	p (Benjamini Hochberg FDR corrected)	p	FC ([moR103] vs [neg1])	Log FC ([moR103] vs [neg1])	Regulation ([moR103] vs [neg1])	Symbol	Entrez_Gene_ID	Definition	Chromosome	Chromosome Start Index(Avadis)	Chromosome End Index(Avadis)	Probe_Sequence
2600184	1.47165e-05	1.19477e-08	-4.83214	-2.27266	down	TRIAP1	51499	Homo sapiens TP53 regulated inhibitor of apoptosis 1 (TRIAP1), mRNA,	chr12	120881849	120881898	TGCTGCATCTGGTTAAATGTCGGGGTAGGGGGGAAGCTGAAGGTGCTCGC
4890270	1.53083e-05	1.48439e-08	-4.61312	-2.20574	down	LY6E	4061	Homo sapiens lymphocyte antigen 6 complex, locus E (LY6E), mRNA,	chr8	144174885	144174934	CAGGGAGACCGTGTCAGTAGGGATGTGTGCCTGGCTGTGTACGTGGGTGT
3290739	3.92821e-05	2.96652e-07	-4.08597	-2.03068	down	ARL2	402	Homo sapiens ADP-ribosylation factor-like 2 (ARL2), mRNA,	chr11	64546180	64546229	GCTGTGGGCCTCATCCTTCACTCAGTTGTGAAATAAACCGCTCCTTGCCC
5420347	2.95154e-05	1.66453e-07	-3.95615	-1.9841	down	HCFC1R1	54985	Homo sapiens host cell factor C1 regulator 1 (XPO1 dependent) (HCFC1R1), transcript variant 3, mRNA,	chr16	3072707	3072756	CTGGGCACCAAGACCTTCCCTCAACAGAGGACACTGAGCCCAACGGAGTT
6560497	1.95035e-05	5.52601e-08	-3.68803	-1.88285	down	BCAT2	587	Homo sapiens branched chain aminotransferase 2, mitochondrial (BCAT2), nuclear gene encoding mitochondrial protein, mRNA,	chr19	53990412	53990461	GTAGCATCTCGTCACGCCAGCACTCGCCTCCCTACCAATGACTCACCTGA
1500193	1.47165e-05	1.16602e-08	-3.64786	-1.86705	down	SMPD1	6609	Homo sapiens sphingomyelin phosphodiesterase 1, acid lysosomal (SMPD1), transcript variant ASM-2, mRNA,	chr11	6372556	6372605	CTCCTTTCCTGGAGCTGGTTTAGCTGGATATGGGAGGGGGTTTGGCTGCC
5720102	0.000183123	5.67244e-06	-3.58171	-1.84065	down	C7orf55	154791	Homo sapiens chromosome 7 open reading frame 55 (C7orf55), nuclear gene encoding mitochondrial protein, mRNA,	chr7	139026229	139030256	GGCCTATCGGTACCTTGTGAAGGCTTTCCGTGCACATCGGGTCACCAGTG
290730	0.000873956	6.29323e-05	-3.48273	-1.80022	down	HIST1H2BD	3017	Homo sapiens histone cluster 1, H2bd (HIST1H2BD), transcript variant 2, mRNA,	chr6	26171304	26171353	TGTGGATCCCACCCAAATCCAACTCATCCTGGTTTGCTGCACACTGGTTC
2340521	6.15005e-05	7.36897e-07	-3.47324	-1.79628	down	C17orf61	254863	Homo sapiens chromosome 17 open reading frame 61 (C17orf61), mRNA,	chr17	7306360	7306409	TGGGCTGGCTTGCCTTGGCTCTTTGAGCTCCCTTTTGCTTAATTACTGGG
6280446	0.00011839	2.58566e-06	-3.46462	-1.7927	down	LOC642989	642989	PREDICTED: Homo sapiens similar to 40S ribosomal protein S25 (LOC642989), mRNA,	chr1	209413609	209413658	ACTCTGTAAGGAAGTTCCCAAATACAAACTTATAACCCCAGCTGTGGTCT
1820543	3.53245e-05	2.32018e-07	-3.3706	-1.75301	down	ZNF428	126299	Homo sapiens zinc finger protein 428 (ZNF428), mRNA,	chr19	48803470	48803519	GATGGGGTACTGCCGGTCTGTGTTGTCTTAGAAGTAGATGTGTGATGGCC
6560577	2.94283e-05	1.57133e-07	-3.30766	-1.72581	down	HSPB3	8988	Homo sapiens heat shock 27kDa protein 3 (HSPB3), mRNA,	chr5	53752081	53752130	CGGTTCCTGTTCAGATGACATGGGGAAGATGATGGTTCAGCCACTGGTAC
4290102	1.87762e-05	4.99278e-08	-3.29771	-1.72146	down	LOC644563	644563	PREDICTED: Homo sapiens misc_RNA (LOC644563), miscRNA,				GGACAGCTGTGTCTTTGCTGGGGAGTATGAAGACACTCTTGGGACCTGTG
3390093	5.34391e-05	5.82231e-07	-3.27887	-1.7132	down	BOLA3	388962	Homo sapiens bolA homolog 3 (E, coli) (BOLA3), transcript variant 2, mRNA,	chr2	74362705	74362754	GGATTGCGGATATTTACCTCTGTCCCCAAACGCTGACCACGCCCTGGCTG
160612	6.19575e-05	7.5566e-07	-3.27564	-1.71178	down	MGLL	11343	Homo sapiens monoglyceride lipase (MGLL), transcript variant 1, mRNA,	chr3	129023857	129023906	GCCTGGTTCTGATTCTCCAGGCTGTCGTGGTTGTGGAATGCAAACGCCAG
3420671	1.77464e-05	2.62765e-08	-3.23905	-1.69557	down	TRAPPC1	58485	Homo sapiens trafficking protein particle complex 1 (TRAPPC1), mRNA,	chr17	7833740	7833789	TGATGCTCTCCTCCTACCAGAGTGAAGCCCACAGAGTCCCTCCACCTCCA
20392	7.2432e-05	9.90226e-07	-3.22883	-1.69101	down	CISD1	55847	Homo sapiens CDGSH iron sulfur domain 1 (CISD1), mRNA,	chr10	59707034	59707083	CATGGAGGATTTGGGAGATAAAGCTGTGTACTGCCGTTGTTGGAGGTCCA
6270768	3.84295e-05	2.81834e-07	-3.19836	-1.67733	down	PLAC9	219348	Homo sapiens placenta-specific 9 (PLAC9), mRNA,	chr10	81891873	81892264	CAGACACATGGCTGTGCAACGCCGTCTAGATGTCATGGAGGAGATGGTAG
5390411	3.10914e-05	1.85193e-07	-3.19542	-1.676	down	PHPT1	29085	Homo sapiens phosphohistidine phosphatase 1 (PHPT1), mRNA,	chr9	138864348	138864397	CGGGCGCATCTCCCACCAGAGTCAGGACAAGAAGATTCACGTGTACGGCT
4890427	4.02294e-05	3.20922e-07	-3.18663	-1.67203	down	MRPL23	6150	Homo sapiens mitochondrial ribosomal protein L23 (MRPL23), nuclear gene encoding mitochondrial protein, mRNA,	chr11	1930623	1934072	ATCAAGAAGCCGGACTACAAGGTCGCCTACGTGCAGCTGGCCCATGGACA
6280224	0.00241102	0.000277646	-3.17912	-1.66863	down	CYP26B1	56603	Homo sapiens cytochrome P450, family 26, subfamily B, polypeptide 1 (CYP26B1), mRNA,	chr2	72356794	72356843	AGCACTTTCGATGTTGGGCGCTGGCGTTTGTGTTCTGGGCACCACCGTGA
1170047	0.000585876	3.52475e-05	-3.17245	-1.6656	down	CRIP1	1396	Homo sapiens cysteine-rich protein 1 (intestinal) (CRIP1), mRNA,	chr14	105025870	105026065	GCCGAGAGCCACACTTTCAAGTAAACCAGGTGGTGGAGACCCCATCCTTG
1240482	1.77464e-05	4.29726e-08	-3.17088	-1.66488	down	LAGE3	8270	Homo sapiens L antigen family, member 3 (LAGE3), mRNA,	chrX	153706351	153706624	TCGTCCGCTGGAAAGCTGAAGACTGTCGCCTGCTCCGAATTTCCGTCATC
5570088	0.000241911	8.64464e-06	-3.16949	-1.66425	down	SRM	6723	Homo sapiens spermidine synthase (SRM), mRNA,	chr1	11114789	11114838	GACCTCCTGCTGGCTCTCGCCCACCAACCAAGTGTTACAAGCCCCAGAAT
7150762	0.00976013	0.00197071	-3.16682	-1.66304	down	PTGIS	5740	Homo sapiens prostaglandin I2 (prostacyclin) synthase (PTGIS), mRNA,	chr20	48120702	48120751	CTTAAGGCCACACTGGCATCTCCCTGACCTTCTCCAGGGACAGAAGCAGG
6520576	8.12011e-05	1.29181e-06	-3.12657	-1.64458	down	BOLA3	388962	Homo sapiens bolA homolog 3 (E, coli) (BOLA3), transcript variant 1, mRNA,	chr2	74362708	74362757	CATGGATTGCGGATATTTACCTCTGTCCCCAAACGCTGACCACGCCCTGG
6560390	0.000103993	2.13849e-06	-3.11747	-1.64038	down	CRELD2	79174	Homo sapiens cysteine-rich with EGF-like domains 2 (CRELD2), mRNA,	chr22	48706983	48707032	TATTCAGAAGGATGTCCCGTGGAAAATGTGGCCCTGAGGATGCCGTCTCC
4260441	0.00130724	0.000114433	-3.11111	-1.63743	down	CLEC3B	7123	Homo sapiens C-type lectin domain family 3, member B (CLEC3B), mRNA,	chr3	45052268	45052317	CCCGCATCGCCTACAAGAACTGGGAGACTGAGATCACCGCGCAACCCGAT
2640411	1.77464e-05	3.52087e-08	-3.07272	-1.61952	down	UNC84B	25777	Homo sapiens unc-84 homolog B (C, elegans) (UNC84B), mRNA,	chr22	39130814	39130863	CTCCATCCCGAGGCAGCCAGGGTTTGTTTTGCGCTCTCCTGTCACAAATG
2690561	0.00124243	0.000105069	-3.00736	-1.5885	down	RPLP1	6176	Homo sapiens ribosomal protein, large, P1 (RPLP1), transcript variant 1, mRNA,	chr15	67534876	67534925	CATGGGCTTTGGTCTTTTTGACTAAACCTCTTTTATAACATGTTCAATAA
7210544	4.05002e-05	3.42445e-07	-2.96913	-1.57004	down	LOC100133328	100133328	PREDICTED: Homo sapiens misc_RNA (LOC100133328), miscRNA,	chr1	224381703	224381752	CGTGGTTGCAGAGCCCTAGTCCTGATGGCCCCCGGTGGCATACATTGAAT
3520743	2.94283e-05	1.58593e-07	-2.96577	-1.5684	down	PHLDA3	23612	Homo sapiens pleckstrin homology-like domain, family A, member 3 (PHLDA3), mRNA,	chr1	201434764	201434813	TCCTGCTGCTTAGGTCCTTTTGGGACCCCCACCCATCCAGGCCCTTTCTT
5420452	0.000524012	2.95401e-05	-2.9654	-1.56823	down	OSR2	116039	PREDICTED: Homo sapiens odd-skipped related 2 (Drosophila) (OSR2), mRNA,				ATCCCTAGCCCTTCACTGACCCCAGCTCTTCCCTTGCTGCAGCCGCACCT
2630195	5.58435e-05	6.36244e-07	-2.96422	-1.56765	down	VAMP5	10791	Homo sapiens vesicle-associated membrane protein 5 (myobrevin) (VAMP5), mRNA,	chr2	85673689	85673738	CATCCTGATTGTGCTGCTGGTCGTCTTTCTCCCTCAGAGCAGTGACAGCA
70121	0.000534986	3.04433e-05	-2.96215	-1.56665	down	LOC645638	645638	PREDICTED: Homo sapiens misc_RNA (LOC645638), miscRNA,				CAGCAAGCCTGTGGATGGAGACTACAGGGGATATGGGAGGCAGGGAAGAG
4200110	5.58435e-05	6.32935e-07	-2.93453	-1.55313	down	GTF3C6	112495	Homo sapiens general transcription factor IIIC, polypeptide 6, alpha 35kDa (GTF3C6), mRNA,	chr6	111386701	111387095	CGGAGAAGACGAGGAAGAGGAGGAGCAGTTGGTTCTGGTGGAATTATCAG
6220441	0.00017073	4.94545e-06	-2.93138	-1.55158	down	CISD1	55847	Homo sapiens CDGSH iron sulfur domain 1 (CISD1), mRNA,	chr10	59717475	59717524	GAATGACTACCACCTCTGTCTGATTCACCTTCGCTGGATTCTAAATGTGG
6620292	0.000598375	3.64265e-05	-2.91761	-1.54479	down	C10orf54	64115	Homo sapiens chromosome 10 open reading frame 54 (C10orf54), mRNA,	chr10	73507390	73507439	TGTTTGATCCACCCCCTTCCCTGAAAATCCTGGGAGGTTTTATTGCTGCC
7210035	0.00107651	8.48462e-05	-2.91085	-1.54144	down	SNORD13	692084	Homo sapiens small nucleolar RNA, C/D box 13 (SNORD13), small nucleolar RNA,	chr8	33371010	33371059	GAGCGTGATGATTGGGTGTTCATACGCTTGTGTGAGATGTGCCACCCTTG
4760288	4.03979e-05	3.27913e-07	-2.90913	-1.54059	down	ANAPC11	51529	Homo sapiens anaphase promoting complex subunit 11 (ANAPC11), transcript variant 4, mRNA,	chr17	77451214	77451263	AATGGAAGTTCAAGGAGTGAGGCCCGACCTGGCTCTCGCTGGAGGGGCAT
5260360	0.000171907	5.03768e-06	-2.88448	-1.52831	down	LOC100131801	100131801	PREDICTED: Homo sapiens similar to hCG2036585 (LOC100131801), mRNA,	chr19	7601508	7601720	AGGCCGAGTGGTTTGAGGACGATGTCATACAGCGCAAGAGGGAGCTGTGG
6450424	1.77464e-05	3.9393e-08	-2.87436	-1.52324	down	NME3	4832	Homo sapiens non-metastatic cells 3, protein expressed in (NME3), mRNA,	chr16	1820484	1820533	AACATCCACCTGTCTGGACGTTGCATGGAGGGTGGCGCAGGCCTCTCCAA
1690630	0.00246705	0.000285673	-2.8652	-1.51864	down	FAM43A	131583	Homo sapiens family with sequence similarity 43, member A (FAM43A), mRNA,	chr3	194409702	194409751	GTAGCACTGTTCTGGTTCTGTTTGCACGCCAGTGGGGAGAGAATAAAGAG
4150615	1.77464e-05	3.0187e-08	-2.86301	-1.51753	down	LOC100132673	100132673	PREDICTED: Homo sapiens misc_RNA (LOC100132673), miscRNA,				GCATCGTCTCAGCCCGTGCCCAAGAAGCTGCTCATGATGGCTGGTATTGA
7330379	2.95154e-05	1.63342e-07	-2.854	-1.51299	down	PTMS	5763	Homo sapiens parathymosin (PTMS), mRNA,	chr12	6750146	6750195	CCTACCAGCCTCATTCTTCCTCCGGTAGCCTCTCCCACCTAACCTCTGCA
3840471	9.12963e-05	1.65405e-06	-2.83962	-1.5057	down	LOC728782	728782	PREDICTED: Homo sapiens similar to ribosomal protein L21 (LOC728782), mRNA,	chrX	74520862	74520911	ATGCCCTTTTGGCTGGAACCGCCATCTTCCAGTAATTCGCCAAAATGACG
6290168	0.000165432	4.59257e-06	-2.83733	-1.50453	down	C10orf116	10974	Homo sapiens chromosome 10 open reading frame 116 (C10orf116), mRNA,	chr10	88720419	88720468	GGCAGCCACCACCTCCTCGGTCTGCCCCCTCATTAAAATTCACGTTCCCA
1820482	5.0799e-05	5.2411e-07	-2.83326	-1.50246	down	NDUFB10	4716	Homo sapiens NADH dehydrogenase (ubiquinone) 1 beta subcomplex, 10, 22kDa (NDUFB10), mRNA,	chr16	1951843	1951892	CAGAGGCAGAGGATGCTGCAAGAGAGAAAAGCTGCAAAAGAGGCCGCCGC
1430639	1.95035e-05	5.36495e-08	-2.81584	-1.49356	down	MRPS18C	51023	Homo sapiens mitochondrial ribosomal protein S18C (MRPS18C), nuclear gene encoding mitochondrial protein, mRNA,	chr4	84596340	84597120	CCGGGACTCACACGGTGCTTTGGAGAAGAGGTTGTTCACAACAGGTATCC
7150433	2.12871e-05	6.85605e-08	-2.80141	-1.48615	down	TCTEX1D2	255758	Homo sapiens Tctex1 domain containing 2 (TCTEX1D2), mRNA,	chr3	197507304	197518226	AGAGGTGAAGGAGTATTCATGGCTTCTCGCTGTTTCTGGGATGCTGACAC
5560544	9.10555e-05	1.63605e-06	-2.79988	-1.48537	down			Homo sapiens mRNA; cDNA DKFZp761E1721 (from clone DKFZp761E1721)	chr7	2258027	2258076	AGGGCAGCTCTGTGCATCTGAGGCCTTTGCCCTTGCTTTGCGGGTCAGTT
940010	8.38078e-05	1.39655e-06	-2.79246	-1.48154	down	CHCHD10	400916	Homo sapiens coiled-coil-helix-coiled-coil-helix domain containing 10 (CHCHD10), mRNA,	chr22	24108335	24108384	CACCACTCAGAGTGACCTGTCCCTGTGTGAGGGCTTCAGCGAGGCCCTGA
5090484	0.000298318	1.2396e-05	-2.78216	-1.47621	down	LOC389342	389342	PREDICTED: Homo sapiens similar to QM protein, transcript variant 11 (LOC389342), mRNA,				CCTAAAAGATATATGCGCTCTTTCCCTTCGGTGTGCCACTGAAGATCCTG
50088	4.05002e-05	3.41456e-07	-2.75921	-1.46426	down	HCFC1R1	54985	Homo sapiens host cell factor C1 regulator 1 (XPO1 dependent) (HCFC1R1), transcript variant 3, mRNA,	chr16	3072632	3072681	GGAAGGGAGGCATCCCACCCCCAAGAAGAACTGAATAAAGATTGCTGAGC
6370484	3.87165e-05	2.85618e-07	-2.75243	-1.46071	down	POLR1D	51082	Homo sapiens polymerase (RNA) I polypeptide D, 16kDa (POLR1D), transcript variant 1, mRNA,	chr13	27095480	27095529	ACTCTGTCCTTCAGAAAGGCGTGATTCTAGCTGTTGACCCCTTGCAGCTG
5310411	2.08521e-05	6.31086e-08	-2.74649	-1.45759	down	H2AFJ	55766	Homo sapiens H2A histone family, member J (H2AFJ), transcript variant 1, mRNA,	chr12	14818948	14818997	GAGTTAAACAAGCTGCTGGGCAAAGTGACCATCGCTCAGGGCGGCGTCCT
4010180	0.000490684	2.64087e-05	-2.74606	-1.45736	down	LOC653156	653156	PREDICTED: Homo sapiens similar to hCG1782414 (LOC653156), mRNA,				TAAAAGAAAATCGCCTTTCGGCTGGAACCGCCATCTTCCAGTAATTCGCC
2850520	4.23491e-05	3.64412e-07	-2.74462	-1.4566	down	DPM3	54344	Homo sapiens dolichyl-phosphate mannosyltransferase polypeptide 3 (DPM3), transcript variant 1, mRNA,	chr1	155112669	155112718	ACCATGACGAAATTAGCGCAGTGGCTTTGGGGACTAGCGATCCTGGGCTC
7560215	0.000492869	2.66836e-05	-2.7443	-1.45644	down	LOC100129685	100129685	PREDICTED: Homo sapiens hypothetical protein LOC100129685 (LOC100129685), mRNA,				GAGAGGAAGGGGTTTCCTTTCGGCCGGAACCGCCATCTTCCAGTAATTCG
2340736	0.000100167	2.01178e-06	-2.7309	-1.44938	down	LOC389156	389156	PREDICTED: Homo sapiens misc_RNA (LOC389156), miscRNA,	chr3	147025208	147025257	GAGCTTTTGGACGGAACCGCCATCTTCCAGTAATTCGCCAAAATGACAAA
5860630	0.00527669	0.000839818	-2.73052	-1.44918	down	CCRL1	51554	Homo sapiens chemokine (C-C motif) receptor-like 1 (CCRL1), transcript variant 2, mRNA,	chr3	132319365	132319414	GTTTTCCTCCCTGTATTCCTCACAATAGTTTTCGTCATTGGACTTGCAGG
6270605	0.000175612	5.26743e-06	-2.72257	-1.44497	down	LOC649946	649946	Homo sapiens ribosomal protein L23a pseudogene (LOC649946), non-coding RNA,	chr11	118378958	118379007	CGGCCTGATGGAGAGAAGGAACATGTTCGACTGGCTCCTGATTACAATGC
5090050	3.57211e-05	2.44431e-07	-2.71624	-1.44161	down	NDUFA12	55967	Homo sapiens NADH dehydrogenase (ubiquinone) 1 alpha subcomplex, 12 (NDUFA12), mRNA,	chr12	95397375	95397424	TGCAGCAGATCACCGGCCACGGCGGTCTCCGAGGCTATCTACGGGTTTTT
2060181	0.000135445	3.21343e-06	-2.70892	-1.43772	down	SNHG8	100093630	Homo sapiens small nucleolar RNA host gene 8 (non-protein coding) (SNHG8), non-coding RNA,	chr4	119200266	119200566	CGAGAACCGTCAGTTTGAGCCAGATGGAAGCTGAGCTGAACACATTACGA
4210066	2.18692e-05	8.37396e-08	-2.70672	-1.43655	down	DEF8	54849	Homo sapiens differentially expressed in FDCP 8 homolog (mouse) (DEF8), transcript variant 2, mRNA,	chr16	88553067	88553116	GGGCCGAGACCCAGACGAGGAGTGAGGAATGAGAGAGACCAAAGTTCCTG
4070392	3.53245e-05	2.33662e-07	-2.70378	-1.43498	down	CYBA	1535	Homo sapiens cytochrome b-245, alpha polypeptide (CYBA), mRNA,	chr16	88712587	88713193	AATTACTATGTTCGGGCCGTCCTGCATCTCCTGCTCTCGGTGCCCGCCGG
3710725	6.62354e-05	8.57745e-07	-2.70213	-1.43409	down	ATP5E	514	Homo sapiens ATP synthase, H+ transporting, mitochondrial F1 complex, epsilon subunit (ATP5E), nuclear gene encoding mitochondrial protein, mRNA,	chr20	57607346	57607395	TCTGATCTTCCTGCGGCTGAACCGCCCGGCTGAGCCGACATTGCCGGCGT
2320110	0.000125134	2.86605e-06	-2.6988	-1.43232	down	ATP6V0E1	8992	Homo sapiens ATPase, H+ transporting, lysosomal 9kDa, V0 subunit e1 (ATP6V0E1), mRNA,	chr5	172379849	172379898	GGCTGATTGCAATTCTGGCCCAACTCAACCCTCTCTTTGGACCGCAATTG
6520192	8.65564e-05	1.47304e-06	-2.69561	-1.43061	down	YIF1B	90522	Homo sapiens Yip1 interacting factor homolog B (S, cerevisiae) (YIF1B), transcript variant 4, mRNA,	chr19	43487595	43487644	GCCCCAGGGCGTGGCCGCTGTTACAGAAACAATAAACCCTGATGGGCATG
2140176	5.53942e-05	6.23801e-07	-2.68949	-1.42733	down	THYN1	29087	Homo sapiens thymocyte nuclear protein 1 (THYN1), transcript variant 3, mRNA,	chr11	134119131	134119745	GCCAGGCATCGCAGGACTCATGAAGATCGTGAAAGAGGCTTACCCAGACC
5260349	6.62354e-05	8.64629e-07	-2.6884	-1.42675	down	NGFRAP1	27018	Homo sapiens nerve growth factor receptor (TNFRSF16) associated protein 1 (NGFRAP1), transcript variant 1, mRNA,	chrX	102519173	102519222	CAGGAAATCGACGGGGACAGGCTCGCCGACTTGCCCCTAATTTTCGATGG
4040307	5.44452e-05	6.00335e-07	-2.68032	-1.4224	down	LOC729500	729500	PREDICTED: Homo sapiens misc_RNA (LOC729500), partial miscRNA,	chr1	15991858	15991907	CCACACCAGCCACCTCCACCATGCCGTGAAGTTTGACCCCAGAGAGATCA
1090500	0.000230276	7.96026e-06	-2.67983	-1.42214	down	LOC645166	645166	PREDICTED: Homo sapiens similar to lymphocyte-specific protein 1 (LOC645166), mRNA,	chr1	147218034	147218083	TGTGCCTGGATACCTGAGTCACCAGGTGGAGGAAACTCCCATTGACATGC
610056	8.83345e-05	1.52209e-06	-2.67741	-1.42084	down	CENPB	1059	Homo sapiens centromere protein B, 80kDa (CENPB), mRNA,	chr20	3764544	3764593	GGGCCCAGAGTCCAGCCGTCCAGCTGCTCCTTTCCCAGTTTGATTTCAAT
2140753	2.55947e-05	1.17062e-07	-2.66974	-1.4167	down	RPL14	9045	Homo sapiens ribosomal protein L14 (RPL14), transcript variant 1, mRNA,	chr3	40478551	40478600	GCTGCTAAAGTTCCAGCAAAAAAGATCACCGCCGCGAGTAAAAAGGCTCC
2260132	2.80939e-05	1.44859e-07	-2.65648	-1.40952	down	HDDC2	51020	Homo sapiens HD domain containing 2 (HDDC2), mRNA,	chr6	125638766	125638815	CAGGAAGCGGTCATGAAAGTGCCATGGATGAACACTGGAGGTGGCAGTGC
7100010	0.000113446	2.4294e-06	-2.65356	-1.40793	down	NBL1	4681	Homo sapiens neuroblastoma, suppression of tumorigenicity 1 (NBL1), transcript variant 2, mRNA,	chr1	19857182	19857231	GAACTCCAGGACGAGGAGGACATGGGACTTGCGTGGACAGTCAGGGTTCA
2570463	8.83252e-05	1.51567e-06	-2.64996	-1.40597	down	LOC728492	728492	PREDICTED: Homo sapiens similar to small EDRK-rich factor 1A, telomeric, transcript variant 4 (LOC728492), mRNA,	chr5	70239388	70239437	GATGACTGGCTATTTGGAAAACCTGGGTGCTACTGCCAACTGGGTGTATC
730754	0.000738491	4.93549e-05	-2.64885	-1.40537	down	PAPPA	5069	Homo sapiens pregnancy-associated plasma protein A, pappalysin 1 (PAPPA), mRNA,	chr9	118204015	118204064	CACAATTCCAATCCTTTTTCTGTACCTCACGCGCATAAATTTGCTGCTCC
1010768	9.28274e-05	1.71141e-06	-2.64512	-1.40333	down	NDUFB6	4712	Homo sapiens NADH dehydrogenase (ubiquinone) 1 beta subcomplex, 6, 17kDa (NDUFB6), nuclear gene encoding mitochondrial protein, transcript variant 1, mRNA,	chr9	32572968	32573017	AGCTGCGAGAGCTGAGAAGGCGATGGCTGAAGGACCAGGAGCTGAGCCCT
1780554	1.53083e-05	1.51971e-08	-2.64477	-1.40314	down	TMUB1	83590	Homo sapiens transmembrane and ubiquitin-like domain containing 1 (TMUB1), mRNA,	chr7	150409212	150409261	TTAGTGTTCTGCCGGAGGACCCAGCCGCCTCCAATCCCTGACAGCTCCTT
2760537	7.72404e-05	1.13933e-06	-2.64423	-1.40285	down	MTE	644314	Homo sapiens metallothionein E (MTE), mRNA,				CCGTGGGCTGTGCCAAGTGTGCCCAGGGATGTGTTTGCAAAGGGACATCT
3310228	2.3567e-05	9.77606e-08	-2.64328	-1.40233	down	C11orf67	28971	Homo sapiens chromosome 11 open reading frame 67 (C11orf67), mRNA,	chr11	77209896	77231182	CGCCGTTTGGGAACGCAACTTTGAGGAGACAGTGCGGTGGACTTCAGTGA
6110630	0.000255896	9.4965e-06	-2.64201	-1.40163	down	HIST1H2BK	85236	Homo sapiens histone cluster 1, H2bk (HIST1H2BK), mRNA,	chr6	27214075	27214124	CCCACTGGGGGGTTGGGGTAATATTCTGTGGTCCTCAGCCCTGTACCTTA
290370	9.47464e-05	1.78374e-06	-2.6353	-1.39796	down	LOC100130070	100130070	PREDICTED: Homo sapiens similar to metallopanstimulin (LOC100130070), mRNA,				CCAGAACAGGAGAAGAGGAAACACAAGAAGAAACGCCTGGTGCAGAGCCC
5960411	0.000166978	4.70653e-06	-2.63524	-1.39794	down	BCYRN1	618	Homo sapiens brain cytoplasmic RNA 1 (non-protein coding) (BCYRN1), non-coding RNA,	chr2	47416014	47416063	GGAGGATAGCTTGAGCCCAGGAGTTCGAGACCTGCCTGGGCAATATAGCG
2680612	6.79261e-05	9.10337e-07	-2.63521	-1.39792	down	LOC389156	389156	PREDICTED: Homo sapiens misc_RNA (LOC389156), miscRNA,				GGAGCTTTTGGACGGAACCGCCATCTTCCAGTAATTCGCCAAAATGACAA
4050491	9.00801e-05	1.59807e-06	-2.63491	-1.39775	down	TCEA3	6920	Homo sapiens transcription elongation factor A (SII), 3 (TCEA3), mRNA,	chr1	23710865	23713769	ACCAGGTGCAGACACGCAGTGCTGATGAGCCCATGACTACCTTTGTCTTA
7380706	4.59853e-05	4.25533e-07	-2.63338	-1.39692	down	NINJ1	4814	Homo sapiens ninjurin 1 (NINJ1), mRNA,	chr9	95883880	95883929	AGGGAGCCAGTCAGGCCTGTGAGGGCCGTAGACCTTGTATATACCCTGCA
2320291	9.54792e-05	1.81446e-06	-2.63294	-1.39667	down	MGC87895	644068	PREDICTED: Homo sapiens similar to ribosomal protein S14 (MGC87895), mRNA,				GAAGGCAGACCGAGATGAATCCTCGCCATATGCTGCTATGTTGACCACCC
1510019	0.000344878	1.54337e-05	-2.63241	-1.39639	down	MGST2	4258	Homo sapiens microsomal glutathione S-transferase 2 (MGST2), mRNA,	chr4	140624690	140625218	GGATCACCGGTTTCCGACTGAGTCTGGGGATTTTGGCCTTGTTGACCCTC
5130497	1.77464e-05	3.77815e-08	-2.62914	-1.39459	down	S100A13	6284	Homo sapiens S100 calcium binding protein A13 (S100A13), transcript variant 3, mRNA,	chr1	153598800	153598849	CAGCGTCAACGAGTTCAAAGAGCTGGTTACCCAGCAGTTGCCCCATCTGC
3130010	3.82723e-05	2.71387e-07	-2.61983	-1.38947	down	DEF8	54849	Homo sapiens differentially expressed in FDCP 8 homolog (mouse) (DEF8), transcript variant 2, mRNA,	chr16	88551557	88552959	CCAGGAGCTGAAGGACCCCAATGAGGATGAGCCAAACATCCGAGTGCTCC
2320367	8.06473e-05	1.24145e-06	-2.61764	-1.38827	down	NDUFA13	51079	Homo sapiens NADH dehydrogenase (ubiquinone) 1 alpha subcomplex, 13 (NDUFA13), mRNA,				CATCATGAAGGACGTGCCCGACTGGAAGGTGGGGGAGTCTGTGTTCCACA
7000040	0.000167803	4.78288e-06	-2.6176	-1.38825	down	LOC729236	729236	PREDICTED: Homo sapiens misc_RNA (LOC729236), miscRNA,				GGGCCTTACTCCTTCACAGATCGGTGTAATCGTGAGAGAATCACATGGTG
610689	3.57211e-05	2.44313e-07	-2.61724	-1.38804	down	AIP	9049	Homo sapiens aryl hydrocarbon receptor interacting protein (AIP), mRNA,	chr11	67015037	67015086	TTCTCCCATTGACAGGAGCACTTGGCCCTGCCTTACCTGCCAAGCCCACT
3460066	8.06473e-05	1.24734e-06	-2.61579	-1.38725	down	ROBLD3	28956	Homo sapiens roadblock domain containing 3 (ROBLD3), mRNA,				CTCACCCAAGTGGCGGCATCTTAACGGCATTGGTGGAAGCTGGGGTCAGA
2680767	8.18118e-05	1.32558e-06	-2.61404	-1.38628	down	MRPS24	64951	Homo sapiens mitochondrial ribosomal protein S24 (MRPS24), nuclear gene encoding mitochondrial protein, mRNA,	chr7	43906431	43906480	GCTGGTTTTAAAGCGCCGGGGTAACCAGTTGGAGATCTGTGCCGTGGTCC
4070736	0.000190654	6.01603e-06	-2.60714	-1.38247	down	TAGLN2	8407	Homo sapiens transgelin 2 (TAGLN2), mRNA,	chr1	159888204	159888253	TGTGTCCTCCGTTCATTCCATGGCTGGGAGTCACTGATGCTGCCTCTGCC
2650564	0.000214226	7.25354e-06	-2.60362	-1.38052	down	RARRES3	5920	Homo sapiens retinoic acid receptor responder (tazarotene induced) 3 (RARRES3), mRNA,	chr11	63070226	63070275	GGCCACGGCGCTTGGAATCCTGGTTGTTGCTGGATGCTCTTTTGCGATTA
1260138	0.00957701	0.00192049	-2.58941	-1.37262	down	LOC651872	651872	PREDICTED: Homo sapiens similar to C-C chemokine receptor type 11 (C-C CKR-11) (CC-CKR-11) (CCR-11) (CC chemokine receptor-like 1) (CCRL1) (CCX CKR) (LOC651872), mRNA,				GTTTTCCTCCCTGTATTCCTCACAATAGCTTTCGTCATTGGACTTGCAGG
2320672	2.61689e-05	1.24328e-07	-2.58608	-1.37077	down	LOC728820	728820	PREDICTED: Homo sapiens misc_RNA (LOC728820), miscRNA,				AGATCCCAAAGGGTGTCAGCCGCAAGCTCAACTTGCCTACACTGTCCACC
7210528	4.00152e-05	3.16376e-07	-2.58287	-1.36898	down	TMEM205	374882	Homo sapiens transmembrane protein 205 (TMEM205), mRNA,	chr19	11314494	11314543	CTGAGCAATGGGCTCTGTCTCGCTGGCCTTGCCCTGGAAATAAGGAGCCT
5690369	9.44605e-05	1.76496e-06	-2.5823	-1.36866	down	LOC100131205	100131205	PREDICTED: Homo sapiens hypothetical protein LOC100131205 (LOC100131205), mRNA,	chr1	210291974	210304666	CAACCAAGATCTTCTTTTCGGCCGGAACCGCCATCTTCCAGTAATTCGCC
6200017	0.000145056	3.6669e-06	-2.57875	-1.36667	down	POLR2L	5441	Homo sapiens polymerase (RNA) II (DNA directed) polypeptide L, 7,6kDa (POLR2L), mRNA,	chr11	829972	830021	TCCCTCCTTCTGGGTGTTCTTCAGGCTGAGCAGAGAGGCTCCTGTACCCT
1450082	0.000291956	1.19515e-05	-2.57793	-1.36621	down	TRAPPC2L	51693	Homo sapiens trafficking protein particle complex 2-like (TRAPPC2L), mRNA,	chr16	87454907	87454956	ACGACTGTGGTGGGGCCGTCGGTCTGTTCTGGTTGCCTCTTCCTGAATGG
6520692	1.77464e-05	2.65388e-08	-2.5776	-1.36603	down	C6orf125	84300	Homo sapiens chromosome 6 open reading frame 125 (C6orf125), mRNA,	chr6	33776229	33777110	ACAAACACAAGTACCCTCGCCCCAGAGACACCAGCTTCAGTGGCCTGTCG
1230348	0.000165488	4.61757e-06	-2.57709	-1.36574	down	CARHSP1	23589	Homo sapiens calcium regulated heat stable protein 1, 24kDa (CARHSP1), transcript variant 2, mRNA,	chr16	8948804	8948853	GGGGTGTTCCCGGCCATCAGCACAGCCTATGACCATTGCAACAACCTCTC
5890730	8.12011e-05	1.29026e-06	-2.57342	-1.36369	down	RPS26L	400156	PREDICTED: Homo sapiens 40S ribosomal protein S26-like (RPS26L), misc RNA,				TGTGCCCGATGCGTGCCCAAGGACAACGCCATTAAGAAATTCGTCATTCG
6840189	3.94884e-05	3.06611e-07	-2.57256	-1.36321	down	NDUFA2	4695	Homo sapiens NADH dehydrogenase (ubiquinone) 1 alpha subcomplex, 2, 8kDa (NDUFA2), mRNA,	chr5	140026877	140026926	ACGTGGAGCTGAAGAAGGCGAATCCCGACCTACCCATCCTAATCCGCGAA
3800079	1.77464e-05	4.24766e-08	-2.56971	-1.36161	down	C19orf56	51398	Homo sapiens chromosome 19 open reading frame 56 (C19orf56), mRNA,	chr19	12639931	12639980	CCCTGCCTGCTGCTGGGGGAGATGCTGTCCATGTTTCTAGGGGTATTCAT
650735	0.000247376	9.02499e-06	-2.56859	-1.36098	down	LOC100131205	100131205	PREDICTED: Homo sapiens hypothetical protein LOC100131205, transcript variant 3 (LOC100131205), mRNA,				GTGCGTATTGAGCACATTAAGCATTCTAAGAGCCGAGATAGCTTCCTGAA
7100561	2.08521e-05	6.22418e-08	-2.56626	-1.35967	down	FAM176B	55194	Homo sapiens family with sequence similarity 176, member B (FAM176B), mRNA,	chr1	36787800	36787849	ACATGAGCTCAGAGCTACCCCACACCTTCGGACTGCCTCGGCCCCCACAG
5310632	0.000128404	2.97736e-06	-2.56481	-1.35885	down	LOC643319	643319	PREDICTED: Homo sapiens similar to Transgelin-2 (LOC643319), mRNA,	chr8	107779156	107779205	CCCAAGGGGCAGGTCCCAGTAAAGAAGATCCAGGCCTCCACCATGGCCTT
6480494	1.87762e-05	4.97754e-08	-2.56058	-1.35647	down	MGMT	4255	Homo sapiens O-6-methylguanine-DNA methyltransferase (MGMT), mRNA,	chr10	131455239	131455288	GCTGGCCGAAACTGAGTATGTGCAGTAGGATGGATGTTTGAGCGACACAC
5560682	1.77464e-05	2.95574e-08	-2.55817	-1.35511	down	KRT10	3858	Homo sapiens keratin 10 (epidermolytic hyperkeratosis; keratosis palmaris et plantaris) (KRT10), mRNA,	chr17	36228255	36228608	CTCCTCTTCCGGGTCCGTGGGCGAGTCTTCATCTAAGGGACCAAGATACT
7510632	2.94283e-05	1.57864e-07	-2.5558	-1.35377	down	TAF10	6881	Homo sapiens TAF10 RNA polymerase II, TATA box binding protein (TBP)-associated factor, 30kDa (TAF10), mRNA,	chr11	6632166	6632215	GGACTTGACCCCTGCCCTCAGCGAGTATGGCATCAATGTGAAGAAGCCGC
1940274	7.2432e-05	9.85423e-07	-2.55226	-1.35178	down	IFI27L2	83982	Homo sapiens interferon, alpha-inducible protein 27-like 2 (IFI27L2), mRNA,	chr14	94594185	94594234	CCCAGCTGAACCCGAGGCTAAAGAAGATGAGGCAAGAGAAAATGTACCCC
2060646	3.34919e-05	2.10178e-07	-2.55203	-1.35165	down	MRPL20	55052	Homo sapiens mitochondrial ribosomal protein L20 (MRPL20), nuclear gene encoding mitochondrial protein, mRNA,	chr1	1332424	1332473	GGCCTGCAGGCGCCATGGTCTTCCTCACCGCGCAGCTCTGGCTGCGGAAT
780364	0.000103993	2.13764e-06	-2.53393	-1.34138	down	LOC645157	645157	PREDICTED: Homo sapiens misc_RNA (LOC645157), miscRNA,	chr6	19252331	19252380	GCCTGAGCTGCTGGAACCTCTTCCCTATGAATTCATGGCCTCGTACGTGT
2470484	0.000168798	4.8476e-06	-2.53137	-1.33992	down	RNASEK	440400	Homo sapiens ribonuclease, RNase K (RNASEK), mRNA,	chr17	6858284	6858333	CTGCCAAGTTCGGCTCAATAAGCGCAAGGAATACATGGTGCGCTAGGGCC
4560717	1.47165e-05	1.06153e-08	-2.53065	-1.33951	down	MDK	4192	Homo sapiens midkine (neurite growth-promoting factor 2) (MDK), transcript variant 1, mRNA,	chr11	46361611	46361660	AAAGGACTAGACGCCAAGCCTGGATGCCAAGGAGCCCCTGGTGTCACATG
7160475	0.000249321	9.11532e-06	-2.52723	-1.33755	down	C6orf160	387066	PREDICTED: Homo sapiens chromosome 6 open reading frame 160, transcript variant 4 (C6orf160), mRNA,				GCAGCTCTGAAGATGCAAAGTGAGGGTCGCTGTCTGCCCATTGATAGAGG
7320435	3.373e-05	2.12868e-07	-2.52602	-1.33687	down	DPM3	54344	Homo sapiens dolichyl-phosphate mannosyltransferase polypeptide 3 (DPM3), transcript variant 2, mRNA,	chr1	155112673	155112967	AGTGACCATGACGAAATTAGCGCAGTGGCTTTGGGGACTAGCGATCCTGG
4150458	0.000188073	5.90792e-06	-2.52546	-1.33655	down	RPA3	6119	Homo sapiens replication protein A3, 14kDa (RPA3), mRNA,	chr7	7680227	7680276	TCTCTGGAATTGTGGAAGTGGTTGGAAGAGTAACCGCCAAGGCCACCATC
5090414	4.23491e-05	3.64547e-07	-2.52524	-1.33642	down	MRPL40	64976	Homo sapiens mitochondrial ribosomal protein L40 (MRPL40), nuclear gene encoding mitochondrial protein, mRNA,	chr22	17803280	17803329	TGCTAGAAGCCCAGCAGGAAGCTCTGGAGGAACTGCAACTGGAATCCCCG
5720414	1.77464e-05	3.21175e-08	-2.52368	-1.33553	down	C1orf123	54987	Homo sapiens chromosome 1 open reading frame 123 (C1orf123), mRNA,	chr1	53680138	53680187	ACAGCTTCCCAAGCCCCATCAATAAAGCCCCTGTTCACGCTGCACTGGTG
2230187	4.70356e-05	4.46324e-07	-2.51697	-1.33169	down	MAPBPIP	28956	Homo sapiens mitogen-activated protein-binding protein-interacting protein (MAPBPIP), mRNA,	chr1	154291767	154291816	GGGCCGCCTACGACCGGAACGGGAACCAAGCGTTTAATGAAGACAATCTC
2760519	2.71213e-05	1.32698e-07	-2.51114	-1.32834	down	CKLF	51192	Homo sapiens chemokine-like factor (CKLF), transcript variant 6, mRNA,	chr16	65144132	65144181	CAGCCGAAAATAAAACATCGCCCCTTCTGCTTCAGTGTGAAAGGCCACGT
4200056	0.000118876	2.61294e-06	-2.50853	-1.32684	down	LOC100131785	100131785	PREDICTED: Homo sapiens misc_RNA (LOC100131785), miscRNA,	chr7	104958000	104958049	CTTTGAAGACTTGGGGTTGGTAGTAGATTGGGACCACCACCTGCCTCCAC
110382	0.000987382	7.55803e-05	-2.50735	-1.32617	down	RAC2	5880	Homo sapiens ras-related C3 botulinum toxin substrate 2 (rho family, small GTP binding protein Rac2) (RAC2), mRNA,	chr22	37621465	37621514	GGGGATATCTGCTCAGCCAATGGAAAATCTGGGTTCAACCAGCCCCTGCC
830768	0.000146652	3.74883e-06	-2.50519	-1.32492	down	FLJ43681	388574	PREDICTED: Homo sapiens similar to 60S ribosomal protein L23a (FLJ43681), miscRNA,	chr17	8936	8985	CCCCACGAGAAACAAGCTTGGCCACTATGCTATCATCAAGTTTCCGCTGG
5360121	5.94662e-05	6.99959e-07	-2.50376	-1.32409	down	THYN1	29087	Homo sapiens thymocyte nuclear protein 1 (THYN1), transcript variant 2, mRNA,	chr11	134119769	134120172	ACCAGGCTCGGAACTTCCTTAGAGCCATGAAGCTGGGAGAAGAAGCCTTC
4640291	0.000245767	8.94015e-06	-2.50137	-1.32272	down	LOC729208	729208	PREDICTED: Homo sapiens misc_RNA (LOC729208), miscRNA,				CACGGCTAAACTGGAAGAGTCTACAATGTTACCCAGCATGCTGTTGACAC
3830605	1.77464e-05	3.31293e-08	-2.49983	-1.32183	down	DNLZ	728489	Homo sapiens DNL-type zinc finger (DNLZ), mRNA,	chr9	139256412	139256461	TCCTGCGCTCCCCGGCACTGTGGGACTTCGGCCTTCCAGAAGGAGGTTTT
5490240	6.62642e-05	8.76318e-07	-2.49941	-1.32159	down	MAP1LC3A	84557	Homo sapiens microtubule-associated protein 1 light chain 3 alpha (MAP1LC3A), transcript variant 2, mRNA,	chr20	32611733	32611782	CCCCTCGGTCTCCACGTGGTGTATGGATCTGTGGTCATTGTCCCTCTGCA
6940561	9.80662e-05	1.88448e-06	-2.49365	-1.31826	down	IFI27L2	83982	Homo sapiens interferon, alpha-inducible protein 27-like 2 (IFI27L2), mRNA,	chr14	94594253	94594302	AACATCCTCCTGGCCTCTGTTGGGTCAGTGTTGGGGGCCTGCTTGGGGAA
7330068	8.20447e-05	1.33467e-06	-2.49165	-1.3171	down	SF3B5	83443	Homo sapiens splicing factor 3b, subunit 5, 10kDa (SF3B5), mRNA,	chr6	144457951	144458000	TAAGTATTCCTGTCTCCAAAGGACCGGCTCTCCATGGCTCCTGCGCCTCG
4260647	0.00119072	9.91245e-05	-2.48532	-1.31343	down	YIF1B	90522	Homo sapiens Yip1 interacting factor homolog B (S, cerevisiae) (YIF1B), transcript variant 2, mRNA,	chr19	43487724	43487773	CGAACTCATCTCCTGCCTGCAGGCCCCAAGGTCCACCCTGTCTGGCCACA
540441	0.000773997	5.27707e-05	-2.48032	-1.31052	down	LOC100133999	100133999	PREDICTED: Homo sapiens hypothetical protein LOC100133999 (LOC100133999), mRNA,				ATGCACTATTACTGATGGGCCCCGGCTCCCGCTGCAAGGCGCTCGGGGTA
1770102	3.83124e-05	2.73029e-07	-2.47928	-1.30992	down	NDUFB3	4709	Homo sapiens NADH dehydrogenase (ubiquinone) 1 beta subcomplex, 3, 12kDa (NDUFB3), mRNA,	chr2	201651947	201658432	CCAGAAGAAGCTGGCTGCAAAAGGGCTAAGGGATCCATGGGGCCGCAATG
4780136	2.41896e-05	1.04029e-07	-2.47863	-1.30954	down	UFC1	51506	Homo sapiens ubiquitin-fold modifier conjugating enzyme 1 (UFC1), mRNA,	chr1	159394968	159395017	GTGCATCACACTTAACTCATCTAACTGCTTCCCCGGACACCCTCCACCTC
2480064	1.47165e-05	1.19938e-08	-2.47669	-1.30841	down	C20orf199	441951	Homo sapiens chromosome 20 open reading frame 199 (C20orf199), transcript variant 3, non-coding RNA,	chr20	47329054	47329103	GCAGCCAGCGGGTACAGAATGGATTTTGGAAGAGGGAGTCACCACTGGAC
5360156	0.000140215	3.48284e-06	-2.46965	-1.30431	down	IFITM1	8519	Homo sapiens interferon induced transmembrane protein 1 (9-27) (IFITM1), mRNA,	chr11	305174	305223	GGCTGTTGCCCCTGCCCCCTTGGTCCTGCCCCTAGATACAGCAGTTTATA
3990598	4.97106e-05	5.02754e-07	-2.46924	-1.30407	down	DRAP1	10589	Homo sapiens DR1-associated protein 1 (negative cofactor 2 alpha) (DRAP1), mRNA,	chr11	65445458	65445507	GGACGAAGAAGATTACGACTCCTAGCGCCTTCTGCCCCCCAGACCATAGC
2760452	0.000585563	3.51898e-05	-2.46883	-1.30383	down	RPS29	6235	Homo sapiens ribosomal protein S29 (RPS29), transcript variant 2, mRNA,	chr14	50044128	50044177	AGAGCAGCCCAGGTGGTCATCAGAGTCACCAATGCCAATGCCAGCCTGCA
5080367	1.47165e-05	8.33534e-09	-2.46852	-1.30364	down	CKLF	51192	Homo sapiens chemokine-like factor (CKLF), transcript variant 5, mRNA,	chr16	65144146	65144195	ACATCGCCCCTTCTGCTTCAGTGTGAAAGGCCACGTGAAGATGCTGCGGC
510315	0.000140215	3.45257e-06	-2.46715	-1.30285	down	PSMB5	5693	Homo sapiens proteasome (prosome, macropain) subunit, beta type, 5 (PSMB5), mRNA,	chr14	22565209	22565258	ACAGAGATGCCTACTCAGGAGGTGCAGTCAACCTCTACCACGTGCGGGAG
150131	2.80635e-05	1.42592e-07	-2.45534	-1.29593	down	UXT	8409	Homo sapiens ubiquitously-expressed transcript (UXT), transcript variant 2, mRNA,	chrX	47516626	47516675	CGCATCTATGTGGCCCTGGGATATGGTTTTTTCCTGGAGTTGACACTGGC
610451	2.43331e-05	1.08494e-07	-2.4538	-1.29502	down	HIST2H2AA3	8337	Homo sapiens histone cluster 2, H2aa3 (HIST2H2AA3), mRNA,	chr1	149814268	149814317	CGACTTTCCCGATCGCCAGGCAGGAGTTTCTCTCGGTGACTACTATCGCT
4560246	8.31735e-05	1.37358e-06	-2.45047	-1.29306	down	ATP5I	521	Homo sapiens ATP synthase, H+ transporting, mitochondrial F0 complex, subunit E (ATP5I), nuclear gene encoding mitochondrial protein, mRNA,	chr4	668058	668107	AGGCTTTGCTGGCTTGTGCGGCATCCTGCTCCGTCTGCAGGTTGTGCTTC
2480338	1.99814e-05	5.80916e-08	-2.44972	-1.29261	down	DBI	1622	Homo sapiens diazepam binding inhibitor (GABA receptor modulator, acyl-Coenzyme A binding protein) (DBI), mRNA,	chr2	119841678	119842270	CACTGGGACAGAGGCTGAGTTTGAGAAAGCTGCAGAGGAGGTTAGGCACC
1510521	8.11486e-05	1.27883e-06	-2.44871	-1.29202	down	PAFAH1B3	5050	Homo sapiens platelet-activating factor acetylhydrolase, isoform Ib, gamma subunit 29kDa (PAFAH1B3), mRNA,	chr19	47493038	47493087	GCTGGAGCCCGCACCCTAAGCATCCTGCTGCCTTCCCACAACATTAAACT
2340180	0.000453293	2.34481e-05	-2.44666	-1.29081	down	TAGLN2	8407	Homo sapiens transgelin 2 (TAGLN2), mRNA,	chr1	159888402	159888451	GTCACCTCTGAGGTGCCTGCTGGCATCCTCTCCCCCATGCTTACTAATAC
460114	3.92821e-05	2.9627e-07	-2.44508	-1.28988	down	SNRPF	6636	Homo sapiens small nuclear ribonucleoprotein polypeptide F (SNRPF), mRNA,	chr12	94776956	94779096	GTAGCCTGCAACATTCGGCCGTGGTTTACATGAGTTTACCCCTCAATCCC
520521	5.94662e-05	6.90607e-07	-2.44487	-1.28976	down	MRPL20	55052	Homo sapiens mitochondrial ribosomal protein L20 (MRPL20), nuclear gene encoding mitochondrial protein, mRNA,	chr1	1332472	1332521	CAAGATGGCAGCGGCGCTGCGCGTGCGTTGTTGAGTGTTCGGGACGCCGG
1510291	0.000127594	2.94047e-06	-2.44128	-1.28764	down	PTTG1	9232	Homo sapiens pituitary tumor-transforming 1 (PTTG1), mRNA,	chr5	159787441	159788218	CTCCACCATGGGAATCCAATCTGTTGCAGTCTCCTTCAAGCATTCTGTCG
6590593	8.06473e-05	1.24641e-06	-2.43955	-1.28662	down	ATP5J2	9551	Homo sapiens ATP synthase, H+ transporting, mitochondrial F0 complex, subunit F2 (ATP5J2), nuclear gene encoding mitochondrial protein, transcript variant 1, mRNA,	chr7	99055866	99055915	CCTTGGCCCGAGCCCCTCCGTGAGGAACACAATCTCAATCGTTGCTGAAT
4890408	3.34919e-05	2.07237e-07	-2.43802	-1.28571	down	PMM1	5372	Homo sapiens phosphomannomutase 1 (PMM1), mRNA,	chr22	40302951	40303000	GAAGAGGTTTCTTTCTGCACCAGGAGGAGGCGTGCTCAAGTATCGGTACG
5560131	0.000166573	4.66558e-06	-2.43544	-1.28418	down	ATOX1	475	Homo sapiens ATX1 antioxidant protein 1 homolog (yeast) (ATOX1), mRNA,	chr5	151122469	151122518	ATGCTGATCCTCCCGCTGGCTTCCAGACAGACCTGGGACTTGGCAGTCAT
5050402	0.000188508	5.92827e-06	-2.43222	-1.28227	down	HIST1H2BK	85236	Homo sapiens histone cluster 1, H2bk (HIST1H2BK), mRNA,	chr6	27222496	27222545	CAGCGAAGTCCGCTCCCGCGCCCAAGAAGGGCTCGAAGAAAGCCGTGACT
6860687	0.000728744	4.83418e-05	-2.43163	-1.28192	down	PYCARD	29108	Homo sapiens PYD and CARD domain containing (PYCARD), transcript variant 1, mRNA,	chr16	31213061	31213110	ACGTTGAGTGGCTGCTGGATGCTCTGTACGGGAAGGTCCTGACGGATGAG
1940048	5.58435e-05	6.39512e-07	-2.43142	-1.2818	down	CLEC11A	6320	Homo sapiens C-type lectin domain family 11, member A (CLEC11A), mRNA,	chr19	51228675	51228724	ACCACGACTGCCAGCGGCGTCTCTACTACGTCTGCGAGTTCCCCTTCTAG
3990259	0.000118876	2.61332e-06	-2.42765	-1.27956	down	TMEM91	641649	Homo sapiens transmembrane protein 91 (TMEM91), mRNA,				CCACCGCTCTTCGGGCGGCAGCAACCTGAGATTAAACACCAGACACCCTT
3440338	4.1957e-05	3.57017e-07	-2.42551	-1.27829	down	RNF181	51255	Homo sapiens ring finger protein 181 (RNF181), mRNA,	chr2	85677765	85678080	GAGCTGCCCACTGATGACGACACTTATGAGGAGCACAGACGAGATAAGGC
520468	3.94884e-05	3.06579e-07	-2.42538	-1.27821	down	LOC402175	402175	PREDICTED: Homo sapiens misc_RNA (LOC402175), miscRNA,				GGCCACTGTGCCTGAGACCCTCGACCCAGCCGAATACAACATATCTCTGG
5570279	6.16042e-05	7.46684e-07	-2.42507	-1.27802	down	HIST1H1C	3006	Homo sapiens histone cluster 1, H1c (HIST1H1C), mRNA,	chr6	26164078	26164127	GTGGCTAAGAGCCCAAAGAAGGCCAAGGTTGCGAAGCCCAAGAAAGCTGC
540131	2.95154e-05	1.6545e-07	-2.42472	-1.27782	down	PXMP2	5827	Homo sapiens peroxisomal membrane protein 2, 22kDa (PXMP2), mRNA,	chr12	131788025	131791323	GAAGTTCCGGGTGCTCTTCGCCAACCTGGCAGCTCTGTTCTGGTATGCCT
3120139	4.24756e-05	3.72508e-07	-2.42012	-1.27508	down	NENF	29937	Homo sapiens neuron derived neurotrophic factor (NENF), mRNA,	chr1	210685989	210686038	CAGGTTCTTGGGAGCGTGAGGCAGGAAGACACTAGGTGCTGAATCTCCTG
3370189	8.59246e-05	1.4501e-06	-2.41899	-1.27441	down	ARF5	381	Homo sapiens ADP-ribosylation factor 5 (ARF5), mRNA,	chr7	127018708	127018757	GGCCTCTGCTCCTGCTCCTGCCTGCATGTTCTCTCTGTTGTTGGAGCCTG
4760450	5.58435e-05	6.37288e-07	-2.41791	-1.27376	down	C16orf33	79622	Homo sapiens chromosome 16 open reading frame 33 (C16orf33), mRNA,	chr16	47174	47223	CTGGTGGCTGAGCTTTTTCCCAGCAGGAATGGGTCCTCGAATCATCGTGC
2650274	0.000570395	3.36716e-05	-2.41725	-1.27337	down	C19orf60	55049	Homo sapiens chromosome 19 open reading frame 60 (C19orf60), transcript variant 1, mRNA,	chr19	18561302	18561351	TACCTGCGCAGCGGCCCTGACTACGACTTCGCGCGCTACCGGAGCACAGT
830739	3.84295e-05	2.81288e-07	-2.41656	-1.27296	down	RPP21	79897	Homo sapiens ribonuclease P/MRP 21kDa subunit (RPP21), mRNA,	chr6	30314498	30314547	CCACTACAACCCTTGCCAAACACAGCCCACTCCATTTCAGACCGCCTTCC
2120286	4.95802e-05	4.9923e-07	-2.41558	-1.27237	down	POLE4	56655	Homo sapiens polymerase (DNA-directed), epsilon 4 (p12 subunit) (POLE4), mRNA,	chr2	75050141	75050190	GTCTTTGCACTTACACACACTCTTCCTGTTCTGCCTTCACCTATGCCGGG
6760414	0.00030356	1.28506e-05	-2.41311	-1.2709	down	C19orf60	55049	Homo sapiens chromosome 19 open reading frame 60 (C19orf60), transcript variant 2, mRNA,	chr19	18563960	18564009	CCTTAGGTTTGATGCGGAATCTGCCGAGTGATGGCGGCTCCCCAGGGATG
2360082	5.24225e-05	5.6242e-07	-2.4113	-1.26981	down	LOC100134537	100134537	PREDICTED: Homo sapiens misc_RNA (LOC100134537), miscRNA,	chr7	104531195	104531244	GGCTGGGCAGCCATGGCGTCCTATATCGATGAACACGACTGTGAGCCGTT
610376	1.77464e-05	3.26002e-08	-2.40729	-1.26741	down	NUDCD2	134492	Homo sapiens NudC domain containing 2 (NUDCD2), mRNA,	chr5	162883947	162883996	GCGGATCCTTGGGTGCAAGACCAAATGCAGAGAAAGCTTACATTAGAGAG
1010364	7.91668e-05	1.18449e-06	-2.40394	-1.2654	down	DGCR6	8214	Homo sapiens DiGeorge syndrome critical region gene 6 (DGCR6), mRNA,	chr22	17279542	17279591	GCTCCCAGGCCCAAGCTCTGTGTGACCCAGAGAAATAAAGATGCCTCAGT
130603	3.94884e-05	3.04852e-07	-2.4032	-1.26496	down	DYNLRB1	83658	Homo sapiens dynein, light chain, roadblock-type 1 (DYNLRB1), mRNA,	chr20	32592172	32592221	CATGGCAGTCGCTTGGAACCCACTCACACCAATCCAGTGACCGTGTGTGG
20435	3.08761e-05	1.82815e-07	-2.40185	-1.26415	down	LOC729279	729279	PREDICTED: Homo sapiens misc_RNA (LOC729279), miscRNA,				AAGCCTGCCACCTCCTACGCGCGGACCACCATCAACAAGAATGCTGGCGT
3360093	3.76625e-05	2.63057e-07	-2.39777	-1.26169	down	COMMD1	150684	Homo sapiens copper metabolism (Murr1) domain containing 1 (COMMD1), mRNA,	chr2	62132928	62132977	GGAGTTGGAGTTGTTGAAACCAAGGTGTCCATGATCCCTCCCCACTGACC
4180431	0.000208312	6.90557e-06	-2.39769	-1.26165	down	LOC205251	205251	PREDICTED: Homo sapiens misc_RNA (LOC205251), miscRNA,				AACCGACTGCGGAGGCGCTACTTGGACTGGAGGAAAAGGAGGCTGCAGGA
20465	4.48219e-05	4.00971e-07	-2.3973	-1.26141	down	MRPL36	64979	Homo sapiens mitochondrial ribosomal protein L36 (MRPL36), nuclear gene encoding mitochondrial protein, mRNA,	chr5	1851714	1851763	CCGAGGCACAAGCAGAGACAGATGTAGACCCTTTCCCTCCAGAGTCACGC
2630102	0.000419402	2.07754e-05	-2.39399	-1.25942	down	CCDC28B	79140	Homo sapiens coiled-coil domain containing 28B (CCDC28B), mRNA,	chr1	32443434	32443483	TAGGCGTCCCACGCAGGCCCACACTGCCCCTCTCATTCTCTTCAAACTGT
2470102	0.000158812	4.27365e-06	-2.39355	-1.25915	down	C7orf10	79783	Homo sapiens chromosome 7 open reading frame 10 (C7orf10), mRNA,	chr7	40322934	40356362	CGATCCGAATACACTGGCAAAGGCAACACTTTGCTTGGACCCTTCTCCCC
3310324	0.000302146	1.27318e-05	-2.39224	-1.25836	down	ALKBH7	84266	Homo sapiens alkB, alkylation repair homolog 7 (E, coli) (ALKBH7), mRNA,	chr19	6325377	6325514	ACAGCATCAAGTTCTGCGGGGCCACCATCGCCGGCCTGTCTCTCCTGTCT
830484	0.000140215	3.46727e-06	-2.39057	-1.25735	down	LOC441377	441377	PREDICTED: Homo sapiens similar to 40S ribosomal protein S26 (LOC441377), mRNA,				AGCTTCCCAAGCTGTATGTGAAGCTACCTTACTGTGTGAGTTGTGCAATT
6270717	2.80939e-05	1.45425e-07	-2.38929	-1.25658	down	SNRPC	6631	Homo sapiens small nuclear ribonucleoprotein polypeptide C (SNRPC), mRNA,	chr6	34741316	34741365	TGCCCACTCGGCCCGGAATGACTCGACCAGACAGATAAGGATAGAGGGGA
580626	0.000323061	1.40197e-05	-2.38925	-1.25656	down	LOC100129657	100129657	PREDICTED: Homo sapiens hypothetical protein LOC100129657 (LOC100129657), mRNA,				CTTCGTGTTCACTTTAAGAACACTCGTGGAACTGCTCAGGCCACCAAGGG
3780619	2.80635e-05	1.43278e-07	-2.38452	-1.2537	down	TMEM14A	28978	Homo sapiens transmembrane protein 14A (TMEM14A), mRNA,	chr6	52546654	52546703	GGCCGGCTATGGAGCTTACCGTGTCTCCAATGACAAACGAGATGTAAAAG
6110079	0.00086642	6.22667e-05	-2.38437	-1.25361	down	CRYAB	1410	Homo sapiens crystallin, alpha B (CRYAB), mRNA,	chr11	111779542	111779591	GTCCTCACTGTGAATGGACCAAGGAAACAGGTCTCTGGCCCTGAGCGCAC
6560458	0.00322395	0.000418811	-2.38396	-1.25336	down	GALNTL1	57452	Homo sapiens UDP-N-acetyl-alpha-D-galactosamine:polypeptide N-acetylgalactosaminyltransferase-like 1 (GALNTL1), mRNA,	chr14	68890778	68890827	AGATCAGGCTCTGCACTTATCAGCCGGTCCTTTGTGGCAACGCAGCCCTG
2260576	2.36525e-05	9.92149e-08	-2.37934	-1.25056	down	COX7B	1349	Homo sapiens cytochrome c oxidase subunit VIIb (COX7B), nuclear gene encoding mitochondrial protein, mRNA,	chrX	77044807	77044856	CAGCAAACAATGGCAAGGCAGAGCCACCAGAAACGTACACCTGATTTTCA
3990600	0.000118876	2.62578e-06	-2.37897	-1.25034	down	TMEM93	83460	Homo sapiens transmembrane protein 93 (TMEM93), transcript variant 2, mRNA,	chr17	3519550	3519599	AAACCAGATCGGGAGGACTGTGGCCAGCAATTAACACCATGTAGACTTCC
2260168	2.12871e-05	6.91761e-08	-2.37523	-1.24807	down	LOC731640	731640	PREDICTED: Homo sapiens similar to 60S ribosomal protein L21, transcript variant 2 (LOC731640), mRNA,				ACGGGAAGCAGCCTGAGCTGCTGGAACCTATTTCCTATGAATTCATGGCA
2710451	0.000118876	2.6249e-06	-2.37443	-1.24758	down	LOC651894	651894	PREDICTED: Homo sapiens similar to ribosomal protein S12 (LOC651894), mRNA,				TTGGGCTTCACCCATAACCCACTGCCATGGCCGAGGAACGCATTGCTGTT
1570370	0.000198857	6.32974e-06	-2.37294	-1.24668	down	HINT2	84681	Homo sapiens histidine triad nucleotide binding protein 2 (HINT2), mRNA,	chr9	35813139	35813308	CAAGCAGACAGCAAAGGCTGAGGGCCTGGGAGATGGATACCGACTTGTGA
1500538	0.000374133	1.73901e-05	-2.37197	-1.24609	down	LOC645138	645138	PREDICTED: Homo sapiens similar to ribosomal protein S11 (LOC645138), mRNA,	chr16	66447392	66447441	CGGCCCCTGAGCAAGACAGTACGCTTCAACGTGCTCAAGGTCACCAAGGC
6420541	3.16362e-05	1.90488e-07	-2.37016	-1.24498	down	UBL5	59286	Homo sapiens ubiquitin-like 5 (UBL5), transcript variant 2, mRNA,	chr19	9800531	9801670	CCACGTGTCTCTGGGGGACTATGAAATCCACGATGGGATGAACCTGGAGC
1850047	0.000211794	7.11056e-06	-2.3685	-1.24397	down	FAM189B	10712	Homo sapiens family with sequence similarity 189, member B (FAM189B), transcript variant 1, mRNA,	chr1	155217091	155217140	GCCACCTCTAGCTGCATGACCTTGGGCAAGCTATGTAACCCCAATTGCCT
2510630	7.41981e-05	1.03751e-06	-2.36829	-1.24385	down	LOC727865	727865	PREDICTED: Homo sapiens misc_RNA (LOC727865), miscRNA,				GAGGTCTGTGTATGCTCACTTCCCCCATCAACGTCGTTATCCAGAATGGG
4780689	2.73387e-05	1.34731e-07	-2.36789	-1.2436	down	MRPL51	51258	Homo sapiens mitochondrial ribosomal protein L51 (MRPL51), nuclear gene encoding mitochondrial protein, mRNA,	chr12	6471831	6471880	GCACCCCAAAGAACTGATCAGGGGGCCCATATGGCTTCGAGGTTGGAAAG
1510452	2.80635e-05	1.42749e-07	-2.36709	-1.24311	down	C8orf59	401466	Homo sapiens chromosome 8 open reading frame 59 (C8orf59), transcript variant 3, mRNA,	chr8	86316922	86316971	GAACAAATTAAGAGGGCCGAAGTCCAGGAATGTATTTCACATAGCCAGCC
3800025	3.84295e-05	2.80898e-07	-2.36672	-1.24289	down	C2orf28	51374	Homo sapiens chromosome 2 open reading frame 28 (C2orf28), transcript variant 2, mRNA,	chr2	27292121	27292939	CCCAGAAATGTGTCCTGAGAATGGATCTTGTGTACCTGATGGTCCAGGTC
6250408	0.000475623	2.53702e-05	-2.36642	-1.24271	down	RPL12P6	440176	PREDICTED: Homo sapiens misc_RNA (RPL12P6), miscRNA,	chr14	34279807	34279856	CGGCTTTCGGCTTGGAGGAGGCCAAGGTGCAACTTTCTTTGGTCATTCCG
6900215	2.08521e-05	6.35803e-08	-2.36561	-1.24221	down	GTF2H5	404672	Homo sapiens general transcription factor IIH, polypeptide 5 (GTF2H5), mRNA,	chr6	158533002	158533051	CTGCCATGAAGCAGTTTCTGCTGTACTTGGATGAGTCCAATGCCCTGGGG
3930008	1.46335e-05	3.23713e-09	-2.36524	-1.24199	down	RPL14	9045	Homo sapiens ribosomal protein L14 (RPL14), transcript variant 1, mRNA,	chr3	40478782	40478831	TAAGCCTTTGGATTTAAAGCCTGTTGAGGCTGGAGTTAGGAGGCAGATTG
2000500	1.77464e-05	2.93827e-08	-2.3646	-1.2416	down	SF3B14	51639	Homo sapiens splicing factor 3B, 14 kDa subunit (SF3B14), mRNA,	chr2	24297061	24299115	TTCATCAGCCCGCCAAGATGGCGATGCAAGCGGCCAAGAGGGCGAACATT
7200292	0.000107689	2.27131e-06	-2.36382	-1.24112	down	SCAMP3	10067	Homo sapiens secretory carrier membrane protein 3 (SCAMP3), transcript variant 1, mRNA,	chr1	155225850	155225899	ACTGTGACCTAGTCCCCCCATCAGGCCACACTGCTGCCACCTCTCACACG
4260762	0.000233158	8.1343e-06	-2.3621	-1.24007	down	CHMP2A	27243	Homo sapiens chromatin modifying protein 2A (CHMP2A), transcript variant 1, mRNA,	chr19	63754899	63754948	CCTCAACTGGGGGCTCGCTTAGTGTGGCTGCTGGTGGGAAAAAAGCAGAG
4200181	2.55947e-05	1.16408e-07	-2.36202	-1.24002	down	C19orf70	125988	Homo sapiens chromosome 19 open reading frame 70 (C19orf70), mRNA,	chr19	5679363	5679601	CCCCAGCTCCCAGCCCCTCCAAAGATTTACTTTCCCATCCGTGACTCCTG
3520092	0.00100511	7.74723e-05	-2.36119	-1.23951	down	BAX	581	Homo sapiens BCL2-associated X protein (BAX), transcript variant sigma, mRNA,	chr19	54155907	54155956	TCAGAACCATCATGGGCTGGACATTGGACTTCCTCCGGGAGCGGCTGTTG
1300608	5.52563e-05	6.14682e-07	-2.36044	-1.23906	down	SNHG9	735301	Homo sapiens small nucleolar RNA host gene 9 (non-protein coding) (SNHG9), non-coding RNA,	chr16	1955069	1955118	GGAATCCACCCGAAGAGTGGCTATAAACGTCCGCGCCTCCATTGCGCTCT
2320079	0.000231512	8.04814e-06	-2.35889	-1.23811	down	NME4	4833	Homo sapiens non-metastatic cells 4, protein expressed in (NME4), nuclear gene encoding mitochondrial protein, mRNA,	chr16	390478	390527	AGAGGAGTTTGAGCCACCAACTTCAGTGCCTTTCTGTACCCCAAGCCAGC
5820292	0.000198857	6.34537e-06	-2.35884	-1.23808	down	COPZ2	51226	Homo sapiens coatomer protein complex, subunit zeta 2 (COPZ2), mRNA,	chr17	46103702	46103751	TTCCCCAATCCTGGCAAAAGCCCAAAGATCCCAGGGTCAGGAGAGACCCC
2750647	0.000362796	1.67088e-05	-2.35791	-1.23751	down	C20orf27	54976	Homo sapiens chromosome 20 open reading frame 27 (C20orf27), mRNA,	chr20	3734208	3734257	GAGGTGCAGTCCCCAGCCCCCACCCCTCAGGTCTGTGTTACTTGGTTTTT
1030630	0.000461957	2.41744e-05	-2.35736	-1.23717	down	PPAP2A	8611	Homo sapiens phosphatidic acid phosphatase type 2A (PPAP2A), transcript variant 1, mRNA,	chr5	54830796	54830845	CAAGGCATACCCCCTTCCAACGAGGAGTATTCTGTAATGATGAGTCCATC
1010347	3.57211e-05	2.42762e-07	-2.35614	-1.23643	down	POLR2I	5438	Homo sapiens polymerase (RNA) II (DNA directed) polypeptide I, 14,5kDa (POLR2I), mRNA,	chr19	41296961	41297097	GATCACGCACGAAGTGGACGAACTGACCCAGATTATCGCCGACGTGTCCC
7040079	0.000299998	1.2519e-05	-2.35606	-1.23638	down	AP1S1	1174	Homo sapiens adaptor-related protein complex 1, sigma 1 subunit (AP1S1), transcript variant 1, mRNA,	chr7	100587450	100589072	CCGATACGTGGAGCTCTTAGACAAATACTTTGGCAGTGTGTGCGAGCTGG
1580477	2.18413e-05	8.24013e-08	-2.35405	-1.23514	down	C11orf74	119710	Homo sapiens chromosome 11 open reading frame 74 (C11orf74), mRNA,	chr11	36616125	36626173	GATGTAAGCACCAGCATTCCTTCCTGTATCCCTTTTGTGGCCCAGCCTCC
6420168	9.8465e-05	1.89564e-06	-2.35279	-1.23437	down	DBNDD2	55861	Homo sapiens dysbindin (dystrobrevin binding protein 1) domain containing 2 (DBNDD2), transcript variant 3, mRNA,	chr20	43472577	43472626	AGGTGGTACTCAAGCCATGCTGCCTCCTTACATCCTTTTTGGAACAGAGC
70634	3.42098e-05	2.18322e-07	-2.35253	-1.23421	down	RABAC1	10567	Homo sapiens Rab acceptor 1 (prenylated) (RABAC1), mRNA,	chr19	47152867	47152916	TGGTGGTCATCGGCTCCCACGCTGCCTTCCACCAGATTGAGGCTGTGGAC
1010068	0.00105619	8.26456e-05	-2.34964	-1.23244	down	FKBP2	2286	Homo sapiens FK506 binding protein 2, 13kDa (FKBP2), transcript variant 1, mRNA,	chr11	63766596	63767285	TGCACTACACGGGGAAGCTGGAAGATGGGACAGAGTTTGACAGCAGCCTG
3890427	6.42191e-05	8.08779e-07	-2.34813	-1.23151	down	LOC729843	729843	PREDICTED: Homo sapiens similar to WW domain binding protein 1 (LOC729843), mRNA,	chr2	87010498	87010547	GGATGGGTTACTTGCCCACCAGAAACAGCCCTAGTCCCAACTCCTTGCGT
1470349	3.97393e-05	3.11377e-07	-2.34564	-1.22998	down	RPLP0	6175	Homo sapiens ribosomal protein, large, P0 (RPLP0), transcript variant 2, mRNA,	chr12	120638638	120638687	GACCGCGGGATGGGTGTCGGCGTGACCAGGCCTGAGCTCCCTGTCTCTCC
5390138	0.000273765	1.08085e-05	-2.34411	-1.22904	down	COX7A1	1346	Homo sapiens cytochrome c oxidase subunit VIIa polypeptide 1 (muscle) (COX7A1), mRNA,	chr19	41334414	41334463	ACCGCCCGGAACCGCTTTCAGAACCGAGTGCGCGAGAAACAGAAGCTCTT
6290296	3.16362e-05	1.91771e-07	-2.34282	-1.22825	down	NDUFB7	4713	Homo sapiens NADH dehydrogenase (ubiquinone) 1 beta subcomplex, 7, 18kDa (NDUFB7), nuclear gene encoding mitochondrial protein, mRNA,	chr19	14677068	14677616	AAGCAGGAGCGGCACGACTGGGACTACTGCGAGCACCGCGACTATGTGAT
5720520	0.000183123	5.67451e-06	-2.34201	-1.22774	down	SNHG6	641638	Homo sapiens small nucleolar RNA host gene 6 (non-protein coding) (SNHG6), non-coding RNA,	chr8	68000261	68000310	AGGGAGGAAGAAGCGCGAAGAGCCGTTAGTCATGCCGGTGTGGTGGCGGC
7610593	1.77464e-05	2.26782e-08	-2.34086	-1.22704	down	TRAPPC5	126003	Homo sapiens trafficking protein particle complex 5 (TRAPPC5), transcript variant 3, mRNA,	chr19	7653447	7653496	ACAAGCTGGAGCAGGCCAACGATGACGCGCGCACCTTCTACATCATCGAG
3710400	0.00930316	0.0018481	-2.337	-1.22466	down	AHNAK	79026	Homo sapiens AHNAK nucleoprotein (AHNAK), transcript variant 2, mRNA,	chr11	62201211	62201260	GCCAAGGGCAACAAACACCTGCAGTTAAAGGAATACCTTCCGCGAGGCGG
2690338	8.83345e-05	1.51902e-06	-2.33528	-1.22359	down	RPS21	6227	Homo sapiens ribosomal protein S21 (RPS21), mRNA,	chr20	60395522	60395571	CGCCGATATCTCTGCCGGGTGACTAGCTGCTTCCTTTCTCTCTCGCGCGC
4290148	0.000100167	2.01037e-06	-2.33483	-1.22332	down	HIST2H2AA4	723790	Homo sapiens histone cluster 2, H2aa4 (HIST2H2AA4), mRNA,	chr1	148089454	148089503	CTACATGGCTGCGGTCCTCGAGTATCTGACCGCCGAGATCCTGGAGCTGG
10220	1.77464e-05	2.126e-08	-2.33374	-1.22264	down	ANAPC11	51529	Homo sapiens anaphase promoting complex subunit 11 (ANAPC11), transcript variant 4, mRNA,	chr17	77451428	77451477	AGGCCTCTGGGTGCCTGTGTTCTCGGCATATAGATGTGGTCTCGGTGTGT
1340400	9.89507e-05	1.91935e-06	-2.33247	-1.22186	down	C6orf129	154467	Homo sapiens chromosome 6 open reading frame 129 (C6orf129), mRNA,	chr6	37558919	37558968	ACGCTCGTCTATGCCTACTGGACCATGTGAGCCTGGCACTTCCCCACAAC
650301	3.90809e-05	2.90976e-07	-2.33166	-1.22136	down	SNRPF	6636	Homo sapiens small nuclear ribonucleoprotein polypeptide F (SNRPF), mRNA,	chr12	94776954	94779094	GTAGCCTGCAACATTCGGCCGTGGTTACGATGAGTTTACCCCTCAATCCC
2000445	5.34391e-05	5.84434e-07	-2.32994	-1.2203	down	PSMB10	5699	Homo sapiens proteasome (prosome, macropain) subunit, beta type, 10 (PSMB10), mRNA,	chr16	67968460	67968509	ACCCTGGAGCTAGTGGAGGAAACTGTGCAGGCTATGGAGGTGGAGTAAGC
4150309	0.000368205	1.70101e-05	-2.32916	-1.21981	down	ZNHIT1	10467	Homo sapiens zinc finger, HIT type 1 (ZNHIT1), mRNA,	chr7	100653827	100653970	ACCCACCAGGAGACCAGGTGTCTGAAGTGGACTGTGTGAGCCTGGGCATT
5810088	2.36525e-05	9.97926e-08	-2.32814	-1.21918	down	AURKAIP1	54998	Homo sapiens aurora kinase A interacting protein 1 (AURKAIP1), mRNA,	chr1	1298975	1299024	CGCCCGTTGCTGCTGTGATCCGTAGTAATAAATTCTCAGAGGACTCAGCC
6580253	3.94884e-05	3.06593e-07	-2.3268	-1.21835	down	SERF1B	728492	Homo sapiens small EDRK-rich factor 1B (centromeric) (SERF1B), mRNA,	chr5	69321216	69321265	AGAGTGCCAGAGAACCGTTGCTTTTCCGAGTTGCTCTTCTTCCAGGCTCC
4590615	0.000451694	2.32853e-05	-2.32545	-1.21751	down	C7orf59	389541	Homo sapiens chromosome 7 open reading frame 59 (C7orf59), mRNA,	chr7	99589478	99589527	TGTGGTGAAGAGGCAGAACCGAGGTCGGGAGCCCATTGATGTCTGAGCCT
6220242	1.77464e-05	2.6122e-08	-2.31973	-1.21395	down	ETFB	2109	Homo sapiens electron-transfer-flavoprotein, beta polypeptide (ETFB), transcript variant 1, mRNA,	chr19	56561345	56561394	AAGATGGCGGAGCTGCGCGTGCTCGTAGCTGTCAAGAGGGTCATCGACTA
1580427	2.12871e-05	7.7737e-08	-2.31772	-1.21271	down	THEM2	55856	Homo sapiens thioesterase superfamily member 2 (THEM2), mRNA,	chr6	24806143	24806192	AGAAGAGCATACCAATGCAATAGGCACTCTCCACGGCGGTTTGACAGCCA
5690576	0.000409949	2.00432e-05	-2.31752	-1.21258	down	TBCB	1155	Homo sapiens tubulin folding cofactor B (TBCB), mRNA,	chr19	36616645	36616694	GGACTTCCCGGAGGAGGACTACGGGTTGGACGAGATATGACACCTAAGGA
4290349	1.77464e-05	2.20202e-08	-2.31708	-1.21231	down	LOC643949	643949	PREDICTED: Homo sapiens similar to 60S acidic ribosomal protein P2 (LOC643949), mRNA,				GAGTATTGGCAAGCTTGCCAGTGTACCTGCCGGTGTGGCTGTGGCCATCT
6040110	1.77464e-05	2.13816e-08	-2.31437	-1.21062	down	LOC647285	647285	PREDICTED: Homo sapiens misc_RNA (LOC647285), miscRNA,				AGTGCCGAGGCCATGAGTGCACATGCCGAGGCTATCAGGGCCCTTGTGAA
6760746	6.79261e-05	9.10127e-07	-2.31234	-1.20935	down	MRPL55	128308	Homo sapiens mitochondrial ribosomal protein L55 (MRPL55), nuclear gene encoding mitochondrial protein, transcript variant 1, mRNA,	chr1	226362039	226362088	ACCGCCAGGCTTATGCACGACTCTACCCCGTGCTGCTGGTGAAGCAGGAT
1940743	1.80393e-05	4.54102e-08	-2.30862	-1.20703	down	RPL13	6137	Homo sapiens ribosomal protein L13 (RPL13), transcript variant 2, mRNA,	chr16	88157065	88157114	CAGGGGATTTGGGGCTTTCTTGAAAGACAGTCCAAGCCCTGGATAATGCT
4200025	0.000181537	5.59318e-06	-2.30843	-1.20691	down	OAF	220323	Homo sapiens OAF homolog (Drosophila) (OAF), mRNA,	chr11	119605657	119605706	ATCACAGACCACGAGTGCCTTTCCCGGACCTGGACGTTGCCTCCAGAGCA
5810671	2.61689e-05	1.24607e-07	-2.30786	-1.20656	down	C7orf50	84310	Homo sapiens chromosome 7 open reading frame 50 (C7orf50), mRNA,	chr7	1003189	1003238	TGGTGGGAGCTTGTGGAGTCGGATCACGTACCTGTGCAGAAACCGCCTCT
2190341	0.000243352	8.74014e-06	-2.30718	-1.20613	down	AP1S1	1174	Homo sapiens adaptor-related protein complex 1, sigma 1 subunit (AP1S1), transcript variant 2, mRNA,	chr7	100586621	100586670	GCAGGGAAAACTGCGGCTGCAAAAATGGTACCTGGCCACTTCGGACAAGG
520672	0.000278347	1.11023e-05	-2.30606	-1.20543	down	LOC391833	391833	PREDICTED: Homo sapiens misc_RNA (LOC391833), miscRNA,				GGCCATGCAGTCTTCCAAGTCCCGGGGCTATGTGAAGGAACAGTTTGCTT
4810725	0.00026508	1.00509e-05	-2.30585	-1.2053	down	LOC729769	729769	PREDICTED: Homo sapiens similar to Ubiquinol-cytochrome c reductase hinge protein (LOC729769), mRNA,	chr2	26071311	26071360	AAGGCCCAGGAGTGGCTGGAGCTCTGTGATGAGTGTGTATCCTCTCAATC
5420377	6.22076e-05	7.61155e-07	-2.30552	-1.20509	down	LGALS3	3958	Homo sapiens lectin, galactoside-binding, soluble, 3 (galectin 3) (LGALS3), mRNA,	chr14	54681712	54681761	CCTCACCAGTGCTTCATATACCATGATATAATCTGAAAGGGGCAGATTAA
3390468	2.43331e-05	1.08703e-07	-2.30543	-1.20503	down	MRPL22	29093	Homo sapiens mitochondrial ribosomal protein L22 (MRPL22), nuclear gene encoding mitochondrial protein, transcript variant 1, mRNA,	chr5	154310642	154310691	ATAAAATTGTTTATCCTCCACAACTGCCTGGAGAACCTCGGAGACCAGCA
7210398	0.000390288	1.85561e-05	-2.30465	-1.20455	down	GYPC	2995	Homo sapiens glycophorin C (Gerbich blood group) (GYPC), transcript variant 2, mRNA,	chr2	127170471	127170520	GGGCAGTGCAGGACAACATCAGCTCACTGGCAGGAAAGTCCTTGTTGAGG
5130162	0.000383524	1.81025e-05	-2.30339	-1.20376	down	AK1	203	Homo sapiens adenylate kinase 1 (AK1), mRNA,	chr9	129668725	129668774	CACGTGTCCTTAACACCTGATCTGGCCCAAGCTGCGTGCCCTTTAAGCCA
1430360	0.00015077	3.92541e-06	-2.30266	-1.2033	down	ABHD14A	25864	Homo sapiens abhydrolase domain containing 14A (ABHD14A), mRNA,	chr3	51990050	51990099	TGCCTTCCTTGACCATCTACCTTGAACTAACCCACTCCCAGCTCCCAGCC
5050427	0.000577855	3.43579e-05	-2.3015	-1.20257	down	FKBP1A	2280	Homo sapiens FK506 binding protein 1A, 12kDa (FKBP1A), transcript variant 12B, mRNA,	chr20	1298031	1298080	CTGTCCCTGGGCCAGCAGGGACCTCTGAAGCCTTCTTTGTGGCCTTTTTT
1010647	0.00015077	3.89453e-06	-2.30106	-1.2023	down	TP53I13	90313	Homo sapiens tumor protein p53 inducible protein 13 (TP53I13), mRNA,	chr17	24924201	24924250	TCCTCCTTGTTGGTTGCTGAGTGGGCGGCCAAGGGGAGAAAAGGAGCCGC
3830746	2.12871e-05	7.75176e-08	-2.29768	-1.20018	down	UQCRB	7381	Homo sapiens ubiquinol-cytochrome c reductase binding protein (UQCRB), mRNA,	chr8	97314630	97316963	CAGAAGGCAACGCTTCTCTTTCTGGTCAAAATGGCTGGTAAGCAGGCCGT
5290220	0.000174347	5.19857e-06	-2.29678	-1.19961	down	LOC100129599	100129599	PREDICTED: Homo sapiens similar to mCG7602 (LOC100129599), mRNA,				CGGCCTCAATATGTGCCGCCGGTGTTTCCATCAGTATGCAAAGGACATAG
1260753	0.000255896	9.49727e-06	-2.29587	-1.19904	down	EXOSC1	51013	PREDICTED: Homo sapiens exosome component 1 (EXOSC1), mRNA,				CTACACCCGCCACGGCTACATCTTTTCGTCGCTTGCCGGCTGTCTGATGA
110682	2.15896e-05	8.03724e-08	-2.29112	-1.19605	down	S100A11	6282	Homo sapiens S100 calcium binding protein A11 (S100A11), mRNA,	chr1	152005037	152005086	CTGTCATCATCTCCACAGCCCACCCATCCCCTGAGCACACTAACCACCTC
2940020	2.6443e-05	1.27504e-07	-2.29103	-1.196	down	NSMCE1	197370	Homo sapiens non-SMC element 1 homolog (S, cerevisiae) (NSMCE1), mRNA,	chr16	27236530	27237068	CTACTGGCCCCACGAGATCCCAAAAGTCTTCGACCCTGAGAAGGAGAGGG
4760424	1.77464e-05	3.65543e-08	-2.29012	-1.19542	down	EIF3K	27335	Homo sapiens eukaryotic translation initiation factor 3, subunit K (EIF3K), mRNA,	chr19	39123314	39125677	GTCGGACAGCCAGCTAAAGGTGTGGATGAGCAAATACGGCTGGAGTGCCG
4540441	0.000432246	2.17631e-05	-2.28841	-1.19434	down	LOC641768	641768	PREDICTED: Homo sapiens similar to ribosomal protein S26, transcript variant 2 (LOC641768), mRNA,	chr7	121716296	121716345	TTACTGTGTGAGTTGTGCAATTCACAGCAAAGTAGTCAGGAATCGATCTC
2600278	1.77464e-05	2.18128e-08	-2.28733	-1.19367	down	C1orf54	79630	Homo sapiens chromosome 1 open reading frame 54 (C1orf54), mRNA,	chr1	148518689	148518738	GAACGATGCCGTGTCCAGTTTGCGAAGTCCTATTCCCCTCCTCCTGTCGC
5420014	0.000557501	3.24361e-05	-2.28708	-1.19351	down	DGCR6L	85359	Homo sapiens DiGeorge syndrome critical region gene 6-like (DGCR6L), mRNA,	chr22	20301917	20301966	TCTCACACCTTACTCCACCGGGCACATCCCAACCTGCACTGGGGCCCACC
5570110	0.000980258	7.44794e-05	-2.28576	-1.19268	down	TRIOBP	11078	Homo sapiens TRIO and F-actin binding protein (TRIOBP), transcript variant 6, mRNA,	chr22	36500261	36500310	TTCCTGCCCTACCTCCTACTAACACTTCCTGCCCCATTTGGACCCGTACC
1230019	9.94733e-05	1.9447e-06	-2.28329	-1.19112	down	TSPO	706	Homo sapiens translocator protein (18kDa) (TSPO), transcript variant PBR, mRNA,	chr22	41885255	41885304	TCCCGCTTTGTCCACGGCGAGGGTCTCCGCTGGTACGCCGGCCTGCAGAA
4760112	2.34332e-05	9.47131e-08	-2.28302	-1.19094	down	ATP5J2	9551	Homo sapiens ATP synthase, H+ transporting, mitochondrial F0 complex, subunit F2 (ATP5J2), nuclear gene encoding mitochondrial protein, transcript variant 3, mRNA,	chr7	99055865	99055914	CTTGGCCCGAGCCCCTCCGTGAGGAACACAATCTCAATCGTTGCTGAATC
150100	7.57935e-05	1.07801e-06	-2.2824	-1.19055	down	S100A3	6274	Homo sapiens S100 calcium binding protein A3 (S100A3), mRNA,	chr1	153519825	153519874	GCAGAGCGTGCACCAATGAGACCACGATGGGAAAGGGCCTATTTAACTCC
2750066	7.14951e-05	9.65773e-07	-2.28038	-1.18927	down	LOC100132499	100132499	PREDICTED: Homo sapiens similar to mCG7602 (LOC100132499), mRNA,	chr7	102776273	102776322	CTGAGACCAAGATGGGTCACCAGAAGCTATGCTGGAGCCACCCGCGAAAA
3400674	9.50218e-05	1.79229e-06	-2.28017	-1.18914	down	MRPS15	64960	Homo sapiens mitochondrial ribosomal protein S15 (MRPS15), nuclear gene encoding mitochondrial protein, mRNA,	chr1	36694381	36694430	CTGTATTACCGAAGAGCCCACCGCCGATTCGTGACCAAGAAGGCTCTGTG
6220092	8.29185e-05	1.36206e-06	-2.27927	-1.18857	down	ZDHHC4	55146	Homo sapiens zinc finger, DHHC-type containing 4 (ZDHHC4), transcript variant 3, mRNA,	chr7	6628349	6628398	GGCCACCAACCAGACTACTAACGAGTGGTACAGAGGTGACTGGGCCTGGT
730739	0.000169908	4.9096e-06	-2.27848	-1.18807	down	TCEAL3	85012	Homo sapiens transcription elongation factor A (SII)-like 3 (TCEAL3), transcript variant 2, mRNA,	chrX	102751281	102751330	GATGAGAATATTGCTGGCCCTGCTTTCCCTGGTAGGTATTTGCCAGGCCC
5260156	0.000112385	2.39075e-06	-2.27847	-1.18807	down	LOC642489	642489	PREDICTED: Homo sapiens similar to FK506-binding protein 1A (LOC642489), mRNA,	chr6	63980416	63980465	TCCCTGGGCCAGCAGGGACCTCTGAAGCCTTCTTTGTGGCCTTATTTTTT
3930392	3.79266e-05	2.67158e-07	-2.27603	-1.18652	down	ANG	283	Homo sapiens angiogenin, ribonuclease, RNase A family, 5 (ANG), transcript variant 2, mRNA,	chr14	20232018	20232067	CCTGGTCAAGTGCTGGCTCTGCTGTCCTTGCCTTCCATTTCCCCTCTGCA
2360593	1.47165e-05	8.8391e-09	-2.27586	-1.18641	down	DDT	1652	Homo sapiens D-dopachrome tautomerase (DDT), transcript variant 1, mRNA,	chr22	24313754	24313803	TCCGCTTTTTCCCCTTGGAGTCCTGGCAGATTGGCAAGATAGGGACGGTC
7150280	2.61689e-05	1.23333e-07	-2.27403	-1.18525	down	LOC145853	145853	PREDICTED: Homo sapiens hypothetical LOC145853 (LOC145853), mRNA,	chr15	65600865	65600914	CAACTACCACGTCCTGCGCACCGGCTGCTTCCCCTTCATCAAGTACCACT
7210142	0.0075312	0.00138288	-2.27263	-1.18436	down	TWIST2	117581	PREDICTED: Homo sapiens twist homolog 2 (Drosophila), transcript variant 1 (TWIST2), mRNA,				ATGCACACCAGCAACACCGCCAACACCATCTCGGTGTCCCACCCCTTAGA
5810687	0.000100167	2.0172e-06	-2.27197	-1.18394	down	LARP6	55323	Homo sapiens La ribonucleoprotein domain family, member 6 (LARP6), transcript variant 2, mRNA,	chr15	71143944	71143993	CAGCACCCAGCACATAGGACATGTTTGTTGACTGAATGCGTATCTCTATC
1450377	0.000311475	1.33292e-05	-2.27177	-1.18382	down	BLOC1S1	2647	Homo sapiens biogenesis of lysosome-related organelles complex-1, subunit 1 (BLOC1S1), mRNA,	chr12	54399256	54399580	TTCAACCAGGCACTCAAGGAAATTGGGGATGTGGAGAACTGGGCTCGGAG
6770343	1.87762e-05	4.86531e-08	-2.26928	-1.18224	down	ETFB	2109	Homo sapiens electron-transfer-flavoprotein, beta polypeptide (ETFB), transcript variant 2, mRNA,	chr19	56540255	56540304	CCAAGCTGAAGGAGATTGGGCGGATTTGAGCCCCTCCCAGAGATGGCAAT
3130379	2.18413e-05	8.28585e-08	-2.26833	-1.18163	down	STX8	9482	Homo sapiens syntaxin 8 (STX8), mRNA,	chr17	9419890	9419939	GCCAGAGGAGACCAGAGGCTTGGGTTTTGATGAAATCCGGCAACAGCAGC
1940180	0.000270273	1.05184e-05	-2.26762	-1.18118	down	PSMB9	5698	Homo sapiens proteasome (prosome, macropain) subunit, beta type, 9 (large multifunctional peptidase 2) (PSMB9), transcript variant 1, mRNA,	chr6	32825066	32825115	ACAAGCTGTCCCCGCTGCACGAGCGCATCTACTGTGCACTCTCTGGTTCA
50450	1.87762e-05	4.91055e-08	-2.26485	-1.17942	down	TMEM179B	374395	Homo sapiens transmembrane protein 179B (TMEM179B), mRNA,	chr11	62313981	62314030	CCAGGTCGTGCAGTGGAAGTCTGAAGCCACCCCATACCGGCCTCTGGAGA
1470706	6.62354e-05	8.57886e-07	-2.26163	-1.17736	down	C8orf55	51337	Homo sapiens chromosome 8 open reading frame 55 (C8orf55), mRNA,	chr8	143814569	143814618	AGCACTGCCCGATAGAACACGCCCGCCCTCACTGCTGTTCTTGCCTTACA
6450050	1.77464e-05	4.20107e-08	-2.26047	-1.17662	down	NDUFB6	4712	Homo sapiens NADH dehydrogenase (ubiquinone) 1 beta subcomplex, 6, 17kDa (NDUFB6), nuclear gene encoding mitochondrial protein, transcript variant 1, mRNA,	chr9	32572920	32572969	CTCGGGAGCCGGTGCTGCCCCCACAGAAGATGGGGCCTATGGAGAAATTC
6370468	0.000238087	8.39871e-06	-2.25986	-1.17623	down	BOLA2	552900	Homo sapiens bolA homolog 2 (E, coli) (BOLA2), mRNA,	chr16	29464999	29465048	GTGAACGCGTGCCTAGCAGAAGAGCTCCCGCACATCCATGCCTTTGAACA
1300369	0.000162545	4.44304e-06	-2.25945	-1.17597	down	LOC255783	255783	Homo sapiens hypothetical protein LOC255783 (LOC255783), non-coding RNA,	chr19	52470716	52470765	ACAGAGCCCACAGCCCATCTGCCTCTTCACCTCCCTGAATCCGTGTCCAT
6660193	0.000288745	1.17423e-05	-2.25756	-1.17477	down	NDUFB9	4715	Homo sapiens NADH dehydrogenase (ubiquinone) 1 beta subcomplex, 9, 22kDa (NDUFB9), mRNA,	chr8	125559303	125559352	TGCCAAGAGAGAACAGTGGAAGAAACTGCGGAGGGAAAGCTGGGAACGAG
7510315	1.77464e-05	3.78658e-08	-2.25699	-1.1744	down	HIGD2A	192286	Homo sapiens HIG1 hypoxia inducible domain family, member 2A (HIGD2A), mRNA,	chr5	175749204	175749253	AGGCCCATGTGTCGCTGGGGAGGAAGTGACCCTTTGTGTAACTGTAACCG
2710646	1.77464e-05	4.34144e-08	-2.2568	-1.17428	down	MSRB2	22921	Homo sapiens methionine sulfoxide reductase B2 (MSRB2), mRNA,	chr10	23449812	23449861	TTCCCTTGCCACCCCTTCACGTGCACCCTCAATTTCCACAATTCACTTGA
990615	0.000348658	1.58118e-05	-2.25631	-1.17397	down	MTCP1	4515	Homo sapiens mature T-cell proliferation 1 (MTCP1), nuclear gene encoding mitochondrial protein, transcript variant B1, mRNA,	chrX	153943384	153943433	CAGGCTGTCATCCAAGAACTGCGTAAGTGTTGTGCTCAGTATCCCAAGGG
1050619	3.5395e-05	2.3718e-07	-2.2536	-1.17223	down	NPM3	10360	Homo sapiens nucleophosmin/nucleoplasmin, 3 (NPM3), mRNA,	chr10	103531194	103531243	GAGGGCCTGTGCTCCACACAGCCGTGGTTTTCTGATTTTCACCATGCCCG
730114	0.000186676	5.84783e-06	-2.25334	-1.17206	down	PRICKLE4	29964	Homo sapiens prickle homolog 4 (Drosophila) (PRICKLE4), mRNA,	chr6	41865023	41865303	GGCACCTCAGCCAGGGGTGTAGCCAAGTAGACAAATGGAATCCTGTGCTG
2480327	0.011583	0.00248744	-2.2526	-1.17159	down	MYL9	10398	Homo sapiens myosin, light chain 9, regulatory (MYL9), transcript variant 1, mRNA,	chr20	34609851	34609900	AAGAACCCCACAGACGAATACCTGGAGGGCATGATGAGCGAGGCCCCGGG
5550634	0.00022657	7.75984e-06	-2.24987	-1.16984	down	BEX1	55859	Homo sapiens brain expressed, X-linked 1 (BEX1), mRNA,	chrX	102319087	102319136	GGGAGCTGCAGAGCTACGCAGCCTTCGGTGCAGTCGTCACTCGTGTCTCG
6290091	0.000519075	2.91059e-05	-2.24953	-1.16963	down	SNORD104	692227	Homo sapiens small nucleolar RNA, C/D box 104 (SNORD104), small nucleolar RNA,	chr17	62223468	62223517	ACGTGTTAGACTGCTGACGCGGGTGATGCGAACTGGAGTCTGAGCCTGCC
6250576	7.57935e-05	1.07248e-06	-2.24581	-1.16723	down	MRPL21	219927	Homo sapiens mitochondrial ribosomal protein L21 (MRPL21), nuclear gene encoding mitochondrial protein, transcript variant 1, mRNA,	chr11	68660909	68664017	GACCTTGCGTGTGGAGAGAGAATTCGACTGGAGAAGGTCCTGCTGGTTGG
2750309	0.000113792	2.44086e-06	-2.24524	-1.16687	down	MRPL53	116540	Homo sapiens mitochondrial ribosomal protein L53 (MRPL53), nuclear gene encoding mitochondrial protein, mRNA,	chr2	74552811	74552860	GGCGCTCATCTCACCGCTCTGGAAATGCTCACCGCCTTCGCCTCCCACAT
6380187	2.87926e-05	1.51083e-07	-2.24433	-1.16628	down	C21orf57	54059	Homo sapiens chromosome 21 open reading frame 57 (C21orf57), transcript variant 1, mRNA,	chr21	46531282	46531331	GCGAGTCATCCCCATCAGGAGAGCGCCACTTCGCAGTAAGATCGAGATTG
6280520	0.00808718	0.00152912	-2.24272	-1.16525	down	TMEM45A	55076	Homo sapiens transmembrane protein 45A (TMEM45A), mRNA,	chr3	100295941	100295990	TTGGAGAACAGCTGGCTAAGGATGACTCTAAGTGTACTGTTTGCATTTCC
7210224	6.16042e-05	7.46982e-07	-2.24247	-1.16509	down	DYNLRB1	83658	Homo sapiens dynein, light chain, roadblock-type 1 (DYNLRB1), mRNA,	chr20	32567925	32577780	ATGGCAGAGGTGGAGGAGACACTGAAGCGACTGCAGAGCCAGAAGGGAGT
620433	0.000801656	5.57081e-05	-2.2402	-1.16363	down	C1orf122	127687	Homo sapiens chromosome 1 open reading frame 122 (C1orf122), mRNA,	chr1	38047325	38047374	AGCCCTGACCATCCCCGAGCAGAATACCCTGACTTCTCTCCCTCCCCAGG
5130241	5.34391e-05	5.81591e-07	-2.23758	-1.16194	down	PPIH	10465	Homo sapiens peptidylprolyl isomerase H (cyclophilin H) (PPIH), mRNA,	chr1	42905641	42905690	GCTACCTGTGGTGATCTCGCAGTGTGGGGAGATGTAGTCCAGACAAAGAC
1570725	2.12871e-05	7.18208e-08	-2.23746	-1.16186	down	APOA1BP	128240	Homo sapiens apolipoprotein A-I binding protein (APOA1BP), mRNA,	chr1	154830352	154830401	CCCTCACAGCCCCCAAAAAATCTGCAACCCAGTTTACCGGTCGCTACCAT
3390072	5.83489e-05	6.7441e-07	-2.23708	-1.16162	down	LOC100133477	100133477	PREDICTED: Homo sapiens similar to Nop10p (LOC100133477), mRNA,				CAAGAAACGTTTAAAGGTGCTCATGACCCAGCAACCGCGCCCTGTCCTCT
630086	3.94884e-05	3.02126e-07	-2.23686	-1.16147	down	CCDC23	374969	Homo sapiens coiled-coil domain containing 23 (CCDC23), mRNA,	chr1	43045619	43045668	CCCCAGGTTCAAACCAGATGGGATCCTGAGAGCTTTGAGAGGGTGTTGCC
6130433	0.00067128	4.31732e-05	-2.23667	-1.16135	down	C8orf40	114926	Homo sapiens chromosome 8 open reading frame 40 (C8orf40), mRNA,	chr8	42527068	42527117	CTCCAAGTGGCTCAAAAGGCCTTGACACAGGGAACCTGCACATATCCAGG
1780411	0.000264212	9.95561e-06	-2.23637	-1.16116	down	PEMT	10400	Homo sapiens phosphatidylethanolamine N-methyltransferase (PEMT), nuclear gene encoding mitochondrial protein, transcript variant 1, mRNA,	chr17	17409570	17412751	CCAGTGCCTTGGAACCTGCTGCCTTGGGGACCCTGGACGTGCCGACATAT
1340274	4.85687e-05	4.74744e-07	-2.23562	-1.16068	down	DHRS4	10901	Homo sapiens dehydrogenase/reductase (SDR family) member 4 (DHRS4), mRNA,	chr14	23508065	23508114	CCTGCCGTCAAGGTGGCGTCTTACTCGGGATTTCTGCTGTTGTTGTGGCC
5690328	3.01237e-05	1.73658e-07	-2.23459	-1.16001	down	MRPS33	51650	Homo sapiens mitochondrial ribosomal protein S33 (MRPS33), nuclear gene encoding mitochondrial protein, transcript variant 1, mRNA,	chr7	140352804	140356736	CACACTTACGCTGAACTCATGCAGACGCTCCGATTTCTTGGACTCTACAG
6650360	4.68907e-05	4.42224e-07	-2.23393	-1.15958	down	LOC648638	648638	PREDICTED: Homo sapiens similar to Peptidyl-prolyl cis-trans isomerase NIMA-interacting 4 (Rotamase Pin4) (PPIase Pin4) (Parvulin 14) (Par14) (Peptidyl-prolyl cis/trans isomerase EPVH) (hPar14) (LOC648638), mRNA,				GACAAGAAGGCTCAAGGTCCCAAAGGTGGTGGCAATGAAGTAAAGGTCAG
4280739	0.0015219	0.00014326	-2.22797	-1.15573	down	APCDD1	147495	Homo sapiens adenomatosis polyposis coli down-regulated 1 (APCDD1), mRNA,	chr18	10478228	10478277	CCGTCCAGCCTGATCCCTGGCCTGAGCAACTTCACAACAGTAATTGCACT
3290689	0.000165452	4.59898e-06	-2.22732	-1.15531	down	C14orf166	51637	Homo sapiens chromosome 14 open reading frame 166 (C14orf166), mRNA,	chr14	51540844	51540893	CTGCTCAAATTCTGCGATTGCTGCACATAGAGGAGCTCAGAGAGCTACAG
5670661	6.40159e-05	8.01192e-07	-2.22585	-1.15435	down	MGC71993	440400	Homo sapiens similar to DNA segment, Chr 11, Brigham & Womens Genetics 0434 expressed (MGC71993), mRNA,				GCTCCAGCCCCTCCTCTATTTAAAGACTCCCTGCACCGTGTCACCCAGGT
4040026	0.000776814	5.30529e-05	-2.22449	-1.15347	down	LOC728590	728590	PREDICTED: Homo sapiens similar to rCG23287 (LOC728590), mRNA,				CTTGAAAACCCTTACGGAGAAGACCATCACCCTCGAGGCTGAACCCTTGG
4780047	0.000151733	3.97556e-06	-2.22102	-1.15122	down	DYNLRB1	83658	Homo sapiens dynein, light chain, roadblock-type 1 (DYNLRB1), mRNA,	chr20	32592123	32592172	TTTAATGCCCCCCAAGAATGTTAATGTCAATCATGTCAGTGGACTAGCAC
2370259	0.000114544	2.47322e-06	-2.22062	-1.15096	down	TECR	9524	Homo sapiens trans-2,3-enoyl-CoA reductase (TECR), mRNA,	chr19	14537453	14537582	CATCATGACGCAGTGTCTCCCAGTGGCCCTGTTCTCCCTGGTGGGCTTCA
5290593	4.03979e-05	3.36306e-07	-2.22032	-1.15077	down	GAMT	2593	Homo sapiens guanidinoacetate N-methyltransferase (GAMT), transcript variant 1, mRNA,	chr19	1397140	1397189	CACCAGCAGCTTTCCCAGCTTCTCTGTGAGGGTCACTGCTGCCCACTGCA
160255	3.53245e-05	2.35455e-07	-2.22023	-1.15071	down	LSM10	84967	Homo sapiens LSM10, U7 small nuclear RNA associated (LSM10), mRNA,	chr1	36859379	36859428	TCCATCGGGTGCGAAACTTTGGTGGCAAGGGCCAAGGCCGGTGGGAATTT
2810463	0.00297974	0.000373156	-2.22011	-1.15063	down	LOC729009	729009	PREDICTED: Homo sapiens misc_RNA (LOC729009), miscRNA,	chr2	181445955	181446004	CCCCATTTGTGTGACTTGAGATACATTACCTGAATGAGCAGGTGAAAGCC
6480754	4.05002e-05	3.43186e-07	-2.21952	-1.15025	down	FAM195B	348262	Homo sapiens family with sequence similarity 195, member B (FAM195B), transcript variant 1, mRNA,	chr17	79780517	79780566	TTCAAGATGGCACCAGCTCTTTGGGCCTAGGATACTGCCGGGCCCCCCAA
1050678	6.62354e-05	8.61278e-07	-2.21916	-1.15001	down	LOC100128060	100128060	PREDICTED: Homo sapiens similar to mCG19129, transcript variant 2 (LOC100128060), mRNA,				CAAGATCGTGAAGCCCAATGATGAGAAGCCGGACGAGTTCGAGTCCGGCA
2570035	0.000427533	2.14183e-05	-2.21613	-1.14804	down	C17orf49	124944	Homo sapiens chromosome 17 open reading frame 49 (C17orf49), mRNA,	chr17	6861356	6861405	TCCTGCTGAGCCTTCCACCTCTGACCTCTCACTGTTCATGCCGGACCTGT
7210725	9.20942e-05	1.683e-06	-2.21591	-1.1479	down	MRPL55	128308	Homo sapiens mitochondrial ribosomal protein L55 (MRPL55), nuclear gene encoding mitochondrial protein, transcript variant 5, mRNA,	chr1	226361124	226361173	GCTCCAGTCGAGGAAGGAGTACGAGCAGGAGCTCAGTGATGACTTGCATG
4890358	0.000469543	2.47592e-05	-2.21566	-1.14774	down	LOC100131866	100131866	PREDICTED: Homo sapiens misc_RNA (LOC100131866), miscRNA,				GGATGGGGAACCGCGGTGGCTTCCATGGAGGTTTTGGCAGTGACATTCAG
3460184	3.66528e-05	2.54705e-07	-2.21215	-1.14545	down	C19orf53	28974	Homo sapiens chromosome 19 open reading frame 53 (C19orf53), mRNA,	chr19	13750184	13750233	GATACAGTCACTAACTTCATCTGTCCCCGTGCCCCTTCCCAGGTCCTGCC
6510487	0.000226499	7.7494e-06	-2.21134	-1.14492	down	FAM96B	51647	Homo sapiens family with sequence similarity 96, member B (FAM96B), mRNA,	chr16	65523596	65523645	TTGGAGGTTGTGAATCAGTGCCTGTCAGCCCGCTCCTGAGCCTGGCCTTT
7040184	3.04737e-05	1.77192e-07	-2.2091	-1.14346	down	CCDC34	91057	Homo sapiens coiled-coil domain containing 34 (CCDC34), transcript variant 1, mRNA,	chr11	27378993	27379042	GCGCTTACCAGAAAGCCGCCTGACACCATGGGAGGTGTGGTTTATTGGCA
2900035	0.000496076	2.69782e-05	-2.20729	-1.14227	down	LYPLAL1	127018	Homo sapiens lysophospholipase-like 1 (LYPLAL1), mRNA,	chr1	217413913	217419127	CATAGCGCCTCTCTGATCTTCCTGCATGGCTCAGGTGATTCTGGACAAGG
5870446	1.80084e-05	4.46938e-08	-2.20719	-1.14221	down	ATP5G1	516	Homo sapiens ATP synthase, H+ transporting, mitochondrial F0 complex, subunit C1 (subunit 9) (ATP5G1), nuclear gene encoding mitochondrial protein, transcript variant 2, mRNA,	chr17	44328133	44328182	CTCCATGGGGGGTCACCGGCCTGTTGCTACTGCAACTCCACACCATTCTT
3460253	0.000139274	3.39728e-06	-2.20568	-1.14122	down	OCEL1	79629	Homo sapiens occludin/ELL domain containing 1 (OCEL1), mRNA,	chr19	17200850	17200899	TGCAAATGCCTCTTCAGTTTGGACTCAGCTCTGACAGCCCCTCCTCCAGG
5860148	7.99731e-05	1.21272e-06	-2.20465	-1.14055	down	S100A13	6284	Homo sapiens S100 calcium binding protein A13 (S100A13), transcript variant 3, mRNA,	chr1	153591346	153591395	AAGACCTGAAGATCAGGAAGAAGTAAAGCCGCCTGGCTGAGATGGGGTGG
6660270	8.63033e-05	1.46111e-06	-2.20421	-1.14026	down	MRPL17	63875	Homo sapiens mitochondrial ribosomal protein L17 (MRPL17), nuclear gene encoding mitochondrial protein, mRNA,	chr11	6659775	6659824	TGGACAGTCTTGATGGGGTTGAGAACCTTCTGGGGAGCCAGATGACCCTC
5090215	0.000268802	1.04262e-05	-2.20391	-1.14006	down	IFI6	2537	Homo sapiens interferon, alpha-inducible protein 6 (IFI6), transcript variant 3, mRNA,	chr1	27992615	27992664	TGCGCCGACGATGCCCAGAATCCAGAACTTTGTCTATCACTCTCCCCAAC
160575	4.03979e-05	3.32653e-07	-2.19963	-1.13726	down	LOC644029	644029	PREDICTED: Homo sapiens similar to 60S ribosomal protein L7a (LOC644029), mRNA,	chr15	45810102	45810151	CGAGCTGCATAAGCTGGCCCACAAGTACAGACCAGAGACAAAGCAAGAGA
1940021	2.46129e-05	1.10826e-07	-2.19817	-1.1363	down	GRN	2896	Homo sapiens granulin (GRN), mRNA,	chr17	39785292	39785341	AAGGCTCGATCCTGCGAGAAGGAAGTGGTCTCTGCCCAGCCTGCCACCTT
70167	0.000264765	9.99945e-06	-2.19763	-1.13595	down	LY96	23643	Homo sapiens lymphocyte antigen 96 (LY96), mRNA,	chr8	75103777	75103826	TGGGAGCCCAGAAGAAATGCTCTTTTGCTTGGAGTTTGTCATCCTACACC
360114	0.000490405	2.63763e-05	-2.19747	-1.13585	down	CTXN1	404217	Homo sapiens cortexin 1 (CTXN1), mRNA,	chr19	7895402	7895451	CCCTCCCATGCCGTTCCACTCCTCCCTGCCTCTGAGCCGAACATGATAAT
3870064	0.00169825	0.000167447	-2.19742	-1.13581	down	OSR2	116039	Homo sapiens odd-skipped related 2 (Drosophila) (OSR2), mRNA,	chr8	100026016	100026065	CCAAGCACCCCGGGTCTTTACACAGTCCGCGTCCACAGACTCTGACGAAG
7570630	0.00073631	4.90705e-05	-2.19665	-1.13531	down	PEG10	23089	Homo sapiens paternally expressed 10 (PEG10), transcript variant 1, mRNA, XM_940378	chr7	94136574	94136623	CGGAGGGAACTGCAGGGAGACCAACTTATTTAGAGCGAATTGGACATGGA
6450546	0.00026508	1.01334e-05	-2.1966	-1.13527	down	VKORC1	79001	Homo sapiens vitamin K epoxide reductase complex, subunit 1 (VKORC1), transcript variant 1, mRNA,	chr16	31104634	31104683	CAATCCAACAGCATATTCGGTTGCATCTTCTACACACTACAGCTATTGTT
6250537	1.77464e-05	3.13111e-08	-2.19642	-1.13515	down	LOC729500	729500	PREDICTED: Homo sapiens misc_RNA (LOC729500), partial miscRNA,				CTGAGGTGCACTGGAGGTGAAGTCGCTGCTTCTGCGCTGGCCCCCAAGAT
4560669	0.000115144	2.49435e-06	-2.19617	-1.13499	down	LOC728820	728820	PREDICTED: Homo sapiens misc_RNA (LOC728820), miscRNA,				GATTCTAGGCGCTTCAGGAGCCGCGCCTTAAGGTGCAGACATGGCCAAGT
5260632	0.000163002	4.51354e-06	-2.19556	-1.13459	down	UBE2D4	51619	Homo sapiens ubiquitin-conjugating enzyme E2D 4 (putative) (UBE2D4), mRNA,	chr7	43959533	43959582	GGGTCATGTTACTCCATTTGATGAAGATTCTCACTACCGCCCGCTCCTCC
4780072	0.000333878	1.47141e-05	-2.19138	-1.13184	down	TCEAL3	85012	Homo sapiens transcription elongation factor A (SII)-like 3 (TCEAL3), transcript variant 1, mRNA,	chrX	102751358	102751407	GCTTTAGATGTCAGTCTCGTTACCAGCAGCCTTTTGACCCAACTACGGCG
2370632	0.000244591	8.88004e-06	-2.19121	-1.13173	down	MMP11	4320	Homo sapiens matrix metallopeptidase 11 (stromelysin 3) (MMP11), mRNA,	chr22	22456201	22456250	CAGGTCTTGGTAGGTGCCTGCATCTGTCTGCCTTCTGGCTGACAATCCTG
1780678	9.20942e-05	1.67998e-06	-2.19072	-1.1314	down	LOC374395	374395	Homo sapiens similar to RIKEN cDNA 1810059G22 (LOC374395), mRNA,	chr11	62314210	62314259	GGGGGGAAACATAATGACAGGCCCCCCTCCACCTCTTCCTGCAGCTGTTT
6580132	0.000569996	3.35877e-05	-2.19018	-1.13105	down	NDUFA6	4700	Homo sapiens NADH dehydrogenase (ubiquinone) 1 alpha subcomplex, 6, 14kDa (NDUFA6), nuclear gene encoding mitochondrial protein, mRNA,	chr22	42481758	42481807	CTGTCAGGGATCAGGGCAGCACTAACAGGCGCAAAAGTAGAGCTGTCAAG
4480356	6.79261e-05	9.07518e-07	-2.18976	-1.13078	down	LOC644928	644928	Homo sapiens hCG2033311 (LOC644928), mRNA,	chr1	58294431	58294480	GATCTCGTGAAGCCCGCAAGGACCGAACACCCCCATCCCGATTTAGACCT
7040037	9.89507e-05	1.91386e-06	-2.18926	-1.13044	down	CUEDC2	79004	Homo sapiens CUE domain containing 2 (CUEDC2), mRNA,	chr10	104183241	104183290	AGTGAGCACCAAAGGGGAGCGATTCAAAGATGTGCGGAACCCTGAGGCCG
6370762	3.34919e-05	2.09188e-07	-2.18903	-1.13029	down	POLR2F	5435	Homo sapiens polymerase (RNA) II (DNA directed) polypeptide F (POLR2F), mRNA,	chr22	36693578	36693627	AGGCCCGAAAGATCCCCATCATCATTCGCCGTTACCTGCCAGATGGGAGC
5820170	5.94662e-05	7.01033e-07	-2.18795	-1.12958	down	SIVA1	10572	Homo sapiens SIVA1, apoptosis-inducing factor (SIVA1), transcript variant 1, mRNA,	chr14	104293139	104293188	ACGTGGGCAGATGCTGATTGGACCAGACGGCCGCCTGATCAGGAGCCTTG
4480600	0.000299355	1.24709e-05	-2.18729	-1.12914	down	C20orf127	140851	Homo sapiens chromosome 20 open reading frame 127 (C20orf127), mRNA,	chr20	33269618	33269667	TCTGCAAAGGGGCGTGCAGCTGCTGTGTCTGATGTGGGGACAGCTCTTCT
2600154	0.00391669	0.000550495	-2.18642	-1.12857	down	HSPB6	126393	Homo sapiens heat shock protein, alpha-crystallin-related, B6 (HSPB6), mRNA,	chr19	40937371	40937420	CCTTCAAGACCCAACTGAGCACCCGCTCTGATTCCCCACAGCCTTTCTCC
7160088	2.35251e-05	9.67528e-08	-2.18618	-1.12841	down	TMEM14D	645203	PREDICTED: Homo sapiens transmembrane protein 14D (TMEM14D), mRNA,	chr10	69974402	69974451	GCCGGCGTGGGTGCTTACCAGCTGTATCAGGATCCAAGGAATGTTTGGGA
4920593	0.000701855	4.58364e-05	-2.18579	-1.12816	down	CDKN2C	1031	Homo sapiens cyclin-dependent kinase inhibitor 2C (p18, inhibits CDK4) (CDKN2C), transcript variant 2, mRNA,	chr1	51208517	51208566	CCAGTCCTTCTGTCAGTCTCCGATGCCATCATGCAGCCTGGTTAGGAGCA
240546	1.46335e-05	4.66943e-09	-2.18473	-1.12745	down	SCAND1	51282	Homo sapiens SCAN domain containing 1 (SCAND1), transcript variant 2, mRNA,	chr20	34542098	34542147	AGAAACTGGAAGGAGCCGGTTCGAGCTCAGCCCCTGAGCGTAACTGTGTG
7200274	0.000121286	2.70641e-06	-2.17861	-1.12341	down	DGCR6	8214	Homo sapiens DiGeorge syndrome critical region gene 6 (DGCR6), mRNA,	chr22	17279545	17279654	CCCAGGCCCAAGCTCTGTGTGACCCAGAGAAATAAAGATGCCTCAGTGGC
3360471	5.29815e-05	5.72925e-07	-2.17536	-1.12125	down	EDF1	8721	Homo sapiens endothelial differentiation-related factor 1 (EDF1), transcript variant alpha, mRNA,	chr9	139756745	139756794	CTCAAGCTCCGGGGAAAGGACATTGGAAAGCCCATCGAGAAGGGGCCTAG
7510537	2.84035e-05	1.48034e-07	-2.17417	-1.12047	down	SCO2	9997	Homo sapiens SCO cytochrome oxidase deficient homolog 2 (yeast) (SCO2), nuclear gene encoding mitochondrial protein, mRNA,	chr22	49308992	49309041	TGGACCACTCCATTGCCATCTACCTGCTCAACCCTGACGGCCTCTTCACG
5360553	7.31346e-05	1.01229e-06	-2.17408	-1.1204	down	ECH1	1891	Homo sapiens enoyl Coenzyme A hydratase 1, peroxisomal (ECH1), mRNA,	chr19	43998177	43998365	CATTCGGTGGCCGAGAGCCTCAACTACGTGGCGTCCTGGAACATGAGCAT
3890397	0.000258878	9.66489e-06	-2.17329	-1.11988	down	C14orf112	51241	Homo sapiens chromosome 14 open reading frame 112 (C14orf112), mRNA,	chr14	69862843	69862892	CTGGAAGAATATTCGAGGACCCAGGCCTTGGGAAGATCCTGACCTCCTCC
6060414	0.000136402	3.26658e-06	-2.17231	-1.11923	down	EIF1B	10289	Homo sapiens eukaryotic translation initiation factor 1B (EIF1B), mRNA,	chr3	40328048	40328495	CTGCCAGTTTCTCTTGGAGGTTGGCATTGTAAAGGAGGAACAGCTTAAGG
2070324	0.00124243	0.000104954	-2.17061	-1.1181	down	LOC285741	285741	PREDICTED: Homo sapiens misc_RNA (LOC285741), miscRNA,	chr6	144563738	144563787	TCTACCGCGACCTCATCAGCCACGATGAGATGTTTTCCGACATCTACAAG
5810373	2.94283e-05	1.5773e-07	-2.17046	-1.118	down	FAM127B	26071	Homo sapiens family with sequence similarity 127, member B (FAM127B), transcript variant 1, mRNA,	chrX	134185174	134185223	CATCCCCAGAGACCTCTTGTGTTCCTGCCACATAGCTGCCAGGGCTTAAG
4760431	0.000138568	3.35058e-06	-2.17043	-1.11798	down	LOC136143	136143	PREDICTED: Homo sapiens similar to ribosomal protein L18 (LOC136143), mRNA,	chr7	120868466	120868515	CCACCTCTGTCCCTTTCCCGGATGATCCCGAAAATGAAGCTTCCTGGCCA
3940026	4.56905e-05	4.16325e-07	-2.16983	-1.11758	down	HEBP2	23593	Homo sapiens heme binding protein 2 (HEBP2), mRNA,	chr6	138734104	138734153	CGATGAGAAGGTTTACTACACTGCAGGCTACAACAGTCCTGTCAAATTGC
940653	0.00113428	9.21342e-05	-2.16852	-1.11671	down	LOC388076	388076	PREDICTED: Homo sapiens hypothetical LOC388076 (LOC388076), mRNA,				GAGGGCAAAGAGTTGGAGTTCTATCTTAGGAAAATCAAGGCCCGGAAGGG
1240152	0.0013035	0.000113874	-2.16816	-1.11647	down	CFD	1675	Homo sapiens complement factor D (adipsin) (CFD), mRNA,	chr19	814271	814320	GCAACAAAGTCCCGAGCAATGAAGTCATCCACTCCTGCATCTGGTTGGTC
6400386	0.000431965	2.16863e-05	-2.16749	-1.11602	down	MAP4K2	5871	Homo sapiens mitogen-activated protein kinase kinase kinase kinase 2 (MAP4K2), mRNA,	chr11	64556660	64556709	TTTCCTTTCTACTCTTTCTGCCAAGAGCCTGCCCCTGCATTTGTCCTGGG
3190671	8.12011e-05	1.29583e-06	-2.16676	-1.11554	down	ATP5D	513	Homo sapiens ATP synthase, H+ transporting, mitochondrial F1 complex, delta subunit (ATP5D), nuclear gene encoding mitochondrial protein, transcript variant 1, mRNA,	chr19	1195098	1195147	AGCAGCGGTTCCATCGCAGTGAACGCCGACTCTTCGGTGCAGTTGTTGGC
3370730	0.000794586	5.50759e-05	-2.16665	-1.11547	down	CDC42EP5	148170	Homo sapiens CDC42 effector protein (Rho GTPase binding) 5 (CDC42EP5), mRNA,	chr19	59668026	59668075	CTTCCCGCCCGGCACCCCACTTCTGTATACATAAACGGCCAAGGTGTGTG
1940504	0.000241432	8.58558e-06	-2.16638	-1.11528	down	FKBP1A	2280	Homo sapiens FK506 binding protein 1A, 12kDa (FKBP1A), transcript variant 12A, mRNA,	chr20	1300726	1300775	GAGCTTCTAAAACTGGAATGACAGGAATGGCCTCCTCCCTTAGCTCCCTG
2900470	5.58435e-05	6.37551e-07	-2.16565	-1.1148	down	LOC388532	388532	PREDICTED: Homo sapiens similar to ribosomal protein L21 (LOC388532), mRNA,				AACCAATGAGAAGGAGCCTGAGCTGCTGGAACCTATTCCGTATGAACTCA
3710039	7.31346e-05	1.01644e-06	-2.16551	-1.11471	down	MRPL54	116541	Homo sapiens mitochondrial ribosomal protein L54 (MRPL54), nuclear gene encoding mitochondrial protein, mRNA,	chr19	3716282	3718260	GGAAGGGCAGGATGTACCCCTGAAACCGGATGCTGAGTACCCTGAATGGC
2070564	5.62968e-05	6.46699e-07	-2.1625	-1.1127	down	TOMM6	100188893	Homo sapiens translocase of outer mitochondrial membrane 6 homolog (yeast) (TOMM6), nuclear gene encoding mitochondrial protein, mRNA,	chr6	41757346	41757395	CAGCCTACAATCTGTGACCACCACAAGATGTGCCCTGATGGCAGCTGAAG
4900114	0.00110994	8.87791e-05	-2.1625	-1.1127	down	MORN2	378464	Homo sapiens MORN repeat containing 2 (MORN2), mRNA,	chr2	38956694	38956743	AGAGCTGGCCGCCCAGGGGGAGTCGCAGAGTTTGGAAGATCTCTCTAACA
7100066	1.40057e-05	2.48283e-09	-2.16224	-1.11253	down	POLR2G	5436	Homo sapiens polymerase (RNA) II (DNA directed) polypeptide G (POLR2G), mRNA,	chr11	62289709	62289758	GATTCAGCAGGACGATGAGATCCGCTTAAAGATTGTGGGGACCCGTGTGG
380541	0.000245877	8.9541e-06	-2.16111	-1.11177	down	PPPDE2	27351	Homo sapiens PPPDE peptidase domain containing 2 (PPPDE2), mRNA,	chr22	41999281	41999330	GGCACAGTTCCTGACTGGGCGGAAGATTCCTTCTTACATCACAGACCTGC
3870470	9.36711e-05	1.73693e-06	-2.16057	-1.11141	down	LOC728973	728973	PREDICTED: Homo sapiens similar to 40S ribosomal protein S7 (S8) (LOC728973), mRNA,	chr1	231491360	231491409	CAAGCAAAATTGTGGGCAAGAGAATCCGCGTGAAACTAGATGGCAGCCGG
1260086	0.000277205	1.10272e-05	-2.15963	-1.11078	down	ID2	3398	Homo sapiens inhibitor of DNA binding 2, dominant negative helix-loop-helix protein (ID2), mRNA,	chr2	8739817	8739866	GGAGCAAAACCCCTGTGGACGACCCGATGAGCCTGCTATACAACATGAAC
650605	0.000124828	2.85172e-06	-2.15894	-1.11032	down	LOC388789	388789	PREDICTED: Homo sapiens hypothetical gene supported by AF147354 (LOC388789), mRNA,				GGCGAAGTCGTCAGACCAAAAGGATGGCTCAGCAAGTGAAGTACCCAGTG
4880195	3.08761e-05	1.82683e-07	-2.15887	-1.11027	down	LOC440991	440991	PREDICTED: Homo sapiens misc_RNA (LOC440991), miscRNA,	chr3	185350655	185350704	CGATCCACAGTGGAGACCCTATTAACTACTACGTTGGCACTGCTGTGTGC
2370167	4.41707e-05	3.91515e-07	-2.15854	-1.11005	down	LOC100130154	100130154	PREDICTED: Homo sapiens similar to thymosin, beta 10 (LOC100130154), mRNA,	chr2	236455826	236455875	ATGGCAGACAAACCAGACGTGGGGGGAATCGCCAGCTTCAATAGGGCCAA
1570288	0.000408284	1.99039e-05	-2.15768	-1.10948	down	HSPB2	3316	Homo sapiens heat shock 27kDa protein 2 (HSPB2), mRNA,	chr11	111289806	111289855	GAGGCAGCCATAGTTGAGCCCTGATTGCCACAGACCCAGCACCCAGCAAA
7560092	0.000229534	7.9102e-06	-2.15711	-1.1091	down	TMEM126A	84233	Homo sapiens transmembrane protein 126A (TMEM126A), mRNA,	chr11	85042843	85042892	AATGTGACAAAGGCTCGCATAGCTGCTGGCTTACCAATGGCAGGGATACC
1300315	4.76109e-05	4.59144e-07	-2.1562	-1.10849	down	MRPL21	219927	Homo sapiens mitochondrial ribosomal protein L21 (MRPL21), nuclear gene encoding mitochondrial protein, transcript variant 4, mRNA,	chr11	68664129	68665426	CAGACCCAGTTGAGGAGACCAGACACCATGCAGAGGTCGTGAAGAAGGTG
580369	1.40057e-05	1.27918e-09	-2.15562	-1.1081	down	NDUFS4	4724	Homo sapiens NADH dehydrogenase (ubiquinone) Fe-S protein 4, 18kDa (NADH-coenzyme Q reductase) (NDUFS4), mRNA,	chr5	52977978	52990172	GGGTTGGGCATCAACGGCTGATCCCTTATCCAACATGGTTCTAACCTTCA
3840056	0.000224212	7.64397e-06	-2.15424	-1.10718	down	ERCC1	2067	Homo sapiens excision repair cross-complementing rodent repair deficiency, complementation group 1 (includes overlapping antisense sequence) (ERCC1), transcript variant 2, mRNA,	chr19	50604772	50604821	CCCGGAGGCTGTTTGATGTCCTGCACGAGCCCTTCTTGAAAGTACCCTGA
6660132	1.77464e-05	4.16462e-08	-2.15399	-1.10701	down	DCXR	51181	Homo sapiens dicarbonyl/L-xylulose reductase (DCXR), mRNA,	chr17	79993776	79993825	ACACACCTCAAGCCCCATGCCGTGCTCATCCTACCCCCAATCCCTCCAAT
5050437	0.000293026	1.20421e-05	-2.15385	-1.10692	down	SCAND1	51282	Homo sapiens SCAN domain containing 1 (SCAND1), transcript variant 1, mRNA,	chr20	34541852	34541901	TCGGTCCCGAGACGTTCCGCCAGCGTTTCCGGCAGTTCCGCTACCAGGAT
7550750	0.000512376	2.84539e-05	-2.15323	-1.1065	down	LOC388556	388556	PREDICTED: Homo sapiens misc_RNA (LOC388556), miscRNA,				CAGTGAACGGGTCCTGCACTCAGGCGCAGACGGGGAAGCGGAGCCAACAT
540240	0.000163002	4.50286e-06	-2.15091	-1.10495	down	LOC440957	440957	Homo sapiens similar to CG32736-PA (LOC440957), mRNA,	chr3	52570714	52570763	CGTCCGGGCGATCCAGTGCTTAGTTCCGTCATATCCCTCTCCACGACCTC
6130332	0.000383423	1.8053e-05	-2.15047	-1.10465	down	UCRC	29796	Homo sapiens ubiquinol-cytochrome c reductase complex (7,2 kD) (UCRC), transcript variant 2, mRNA,	chr22	28493546	28493595	CTGTGCCATCCCTGACCTTGGACCCGCCTGAGGGGTGACAGTGGAGTAGA
7100523	0.000181358	5.57482e-06	-2.14951	-1.104	down	LOC727826	727826	PREDICTED: Homo sapiens hypothetical LOC727826 (LOC727826), mRNA,	chr12	131912740	131912789	AGTGGGCGAGTGCCGGCCTTGCCGGCCTCTGAGCAAGACAGTGCACCTCA
1580021	4.63139e-05	4.31858e-07	-2.14894	-1.10362	down	TCTEX1D2	255758	Homo sapiens Tctex1 domain containing 2 (TCTEX1D2), mRNA,	chr3	197527474	197529331	TTCTGCGGCCTGTTTTCCAGCAGAGGTTCAGGCCCTCTGTGGTTAAAGAC
2450255	8.98819e-05	1.57425e-06	-2.14734	-1.10255	down	LOC391532	391532	PREDICTED: Homo sapiens misc_RNA (LOC391532), miscRNA,	chr15	73826687	73826736	CAGACCGTTCCTTCTGTAGCTCAGGACAGCACCCTCCACCCCACTTACTC
1070025	2.12871e-05	7.35948e-08	-2.14595	-1.10162	down	ATPIF1	93974	Homo sapiens ATPase inhibitory factor 1 (ATPIF1), nuclear gene encoding mitochondrial protein, transcript variant 3, mRNA,	chr1	28435495	28435544	GAAGCCGGTGGGGCCTTCGGAAAGAGAGAGCAGGCTGAAGAGGAACGATA
1990047	8.06473e-05	1.25505e-06	-2.14517	-1.10109	down	C9orf119	375757	Homo sapiens chromosome 9 open reading frame 119 (C9orf119), mRNA,	chr9	130090876	130090925	CACTGAGAGCCCAACCAGCACACCTACAGAGTTTCCAGCGAGACAATGCC
60148	0.000134991	3.17794e-06	-2.14476	-1.10081	down	BOLA2	552900	Homo sapiens bolA homolog 2 (E, coli) (BOLA2), mRNA,	chr16	29465524	29465573	ATGGAACTCAGCGCCGAATACCTCCGCGAGAAGCTGCAGCGGGACCTGGA
1450477	3.50704e-05	2.27544e-07	-2.14389	-1.10023	down	SIVA1	10572	Homo sapiens SIVA1, apoptosis-inducing factor (SIVA1), transcript variant 2, mRNA,	chr14	104293990	104294039	ATCTGGGGTAGCGTCCATTGCCTGTTCCTCATGCGTGCGAGCCGTGGATG
1010246	0.000162545	4.43039e-06	-2.14306	-1.09967	down	IFI6	2537	Homo sapiens interferon, alpha-inducible protein 6 (IFI6), transcript variant 2, mRNA,	chr1	27994780	27994829	AACTCGGTGGCTGCCTCGCTGATGAGCTGGTCTGCGATCCTGAATGGGGG
3850110	4.97106e-05	5.04102e-07	-2.14294	-1.09959	down	COX6A1	1337	Homo sapiens cytochrome c oxidase subunit VIa polypeptide 1 (COX6A1), nuclear gene encoding mitochondrial protein, mRNA,	chr12	119360625	119360674	TGAATGTGTACCTGAAGTCGCACCACGGAGAGCACGAGAGACCCGAGTTC
3120707	0.000515974	2.88675e-05	-2.14143	-1.09858	down	CUTA	51596	Homo sapiens cutA divalent cation tolerance homolog (E, coli) (CUTA), transcript variant 5, mRNA,	chr6	33493237	33493286	CTGCAGCCTTTGTTACTTGCCCCAACGAGAAGGTCGCCAAGGAGATCGCC
6900224	7.2432e-05	9.86859e-07	-2.14008	-1.09766	down	BSCL2	26580	Homo sapiens Bernardinelli-Seip congenital lipodystrophy 2 (seipin) (BSCL2), mRNA,	chr11	62214369	62214418	CCTGAAGAAAAGGGGCAGACTCCTCACATTCCAGCACTTTCCCACCTGAC
1980600	2.12871e-05	7.55962e-08	-2.13967	-1.09739	down	LOC645058	645058	PREDICTED: Homo sapiens similar to hepatitis B virus x-interacting protein (LOC645058), mRNA,	chr1	62277178	62277227	CACTTAATCTGGGTTGCCATGGGACCCTGTCAGATGAGCATGCTGGAGTG
4880360	1.77464e-05	2.43408e-08	-2.13605	-1.09494	down	FBL	2091	Homo sapiens fibrillarin (FBL), mRNA,	chr19	45016987	45017036	CGTGGTCGTGGGAGTGTACAGGCCACCCCCCAAGGTGAAGAACTGAAGTT
3140021	9.42635e-05	1.75125e-06	-2.13511	-1.09431	down	PCBD1	5092	Homo sapiens pterin-4 alpha-carbinolamine dehydratase/dimerization cofactor of hepatocyte nuclear factor 1 alpha (PCBD1), mRNA,	chr10	72643516	72643565	GTGGGATGTGCCAGTGTCCCCACCAACACCAGGAATTTAGACCTTTTCCC
5420301	0.00105988	8.31596e-05	-2.13482	-1.09411	down	LOC645979	645979	PREDICTED: Homo sapiens similar to ribosomal protein S26 (LOC645979), mRNA,				TGTGAAGCTACATTACTGTGTGAGTTGTGCAATTCACAGCAAAGTAGTCA
5890736	0.000255896	9.49915e-06	-2.13307	-1.09293	down	CACYBP	27101	Homo sapiens calcyclin binding protein (CACYBP), transcript variant 1, mRNA,	chr1	173235841	173235890	CGGGTAGGCGTCTGCGCTCGGTTTGAGGGCTCGGCGCGGGGTTTCCTGTT
6550347	0.000191282	6.05435e-06	-2.13212	-1.09229	down	FAM162B	221303	Homo sapiens family with sequence similarity 162, member B (FAM162B), mRNA,	chr6	117180135	117180184	TGGCAACACTTCACAGCCTCATTCCTGCCTTTTCTCAGCCATTACCTCCC
7330544	0.00028874	1.17216e-05	-2.13187	-1.09212	down	ALDOC	230	Homo sapiens aldolase C, fructose-bisphosphate (ALDOC), mRNA,	chr17	26900217	26900266	CCATGATGAGGTAGCTTCTCCCTGGGCTCTCCTTCTTGCCTGCCCTGTCT
10414	0.00239959	0.000275406	-2.1314	-1.0918	down	PTTG1	9232	Homo sapiens pituitary tumor-transforming 1 (PTTG1), mRNA,	chr5	159781951	159782305	GGTTGCTAAGGATGGGCTGAAGCTGGGGTCTGGACCTTCAATCAAAGCCT
5860376	1.77464e-05	2.3967e-08	-2.12892	-1.09012	down	BAD	572	Homo sapiens BCL2-antagonist of cell death (BAD), transcript variant 2, mRNA,	chr11	63794211	63794260	AGTGACCTTCGCTCCACATCCCGAAACTCCACCCGTTCCCACTGCCCTGG
540524	3.53245e-05	2.31789e-07	-2.12801	-1.08951	down	NMRAL1	57407	Homo sapiens NmrA-like family domain containing 1 (NMRAL1), mRNA,	chr16	4511771	4511820	GGACCAGTGGCTGGAACAGCACAAAGGGGACTTCAACCTGCTGTGACCTG
6840184	0.00172882	0.000172116	-2.12787	-1.08941	down	GRN	2896	Homo sapiens granulin (GRN), mRNA,	chr17	39785841	39785890	GGCCTTCCCTGTCAGAAGGGGGTTGTGGCAAAAGCCACATTACAAGCTGC
4670424	2.12871e-05	6.97554e-08	-2.1277	-1.0893	down	MRPL11	65003	Homo sapiens mitochondrial ribosomal protein L11 (MRPL11), nuclear gene encoding mitochondrial protein, transcript variant 1, mRNA,	chr11	65961198	65961247	CAGGATGAGGCATTTGCCCTGCAGGATGTACCCCTGTCGTCTGTTGTCCG
7100164	0.000357695	1.63655e-05	-2.1271	-1.08889	down	HIGD1A	25994	Homo sapiens HIG1 hypoxia inducible domain family, member 1A (HIGD1A), transcript variant 1, mRNA,	chr3	42826808	42827564	ATGCGTGTGGCAGCCCAAGGCTTTGTTGTAGGAGCAATGACTGTTGGTAT
4610341	0.00410339	0.00058907	-2.12548	-1.08779	down	TMEM45A	55076	Homo sapiens transmembrane protein 45A (TMEM45A), mRNA,	chr3	100277415	100287696	GGGGAGCTGGTTCTTTCAGATTGGATTTGTCCTGTATCCCCCCAGTGGAG
6620360	0.000181394	5.58233e-06	-2.12405	-1.08682	down	C12orf62	84987	Homo sapiens chromosome 12 open reading frame 62 (C12orf62), mRNA,	chr12	48800221	48800270	CCCAGCGCCAGGCCGCAGAAGAACAGAAGACCTCAGGAATCATGTAGAAC
830403	8.06473e-05	1.25524e-06	-2.12269	-1.08589	down	PSME2	5721	Homo sapiens proteasome (prosome, macropain) activator subunit 2 (PA28 beta) (PSME2), mRNA,	chr14	24613440	24613629	TGATTTTGGGGTAGCAATCCAGGAGAAGGTGCTGGAGAGGGTGAATGCCG
2690400	9.94733e-05	1.94975e-06	-2.12201	-1.08543	down	MRPS17	51373	Homo sapiens mitochondrial ribosomal protein S17 (MRPS17), nuclear gene encoding mitochondrial protein, mRNA,	chr7	55990287	55990336	CCTGGAGAGTCCGTTGAGTTCGGAAACCACCCAGCTAAGCAAAAATCTGG
1450682	0.00098704	7.54147e-05	-2.12067	-1.08452	down	C18orf56	494514	Homo sapiens chromosome 18 open reading frame 56 (C18orf56), mRNA,	chr18	649651	649700	CGTCACAGCTTTCCTGGGTTGTTGAGCCTCTAAGATGGTCTTTTCCTCTG
7570446	0.000255896	9.49247e-06	-2.11975	-1.08389	down	TARBP2	6895	Homo sapiens TAR (HIV-1) RNA binding protein 2 (TARBP2), transcript variant 1, mRNA,	chr12	52186326	52186375	CTTGAAGCTGAGAAGGCACAGGGCAAGGAGCCAAGGACCACAGAGCCTCA
4120403	0.000122891	2.7798e-06	-2.11773	-1.08252	down	WDR61	80349	Homo sapiens WD repeat domain 61 (WDR61), mRNA,	chr15	78578399	78578448	TGAGCGGCCATGCCTCCTGGGTGCTGAACGTTGCATTCTGTCCTGATGAC
7400427	2.95154e-05	1.68315e-07	-2.11712	-1.0821	down	LOC442232	442232	PREDICTED: Homo sapiens misc_RNA (LOC442232), miscRNA,	chr6	81140535	81140584	AGCTCTCCCTGCCACATTGAGATGAGCCTTACTGAAAAGGAACAGATTGC
2970482	0.000276477	1.09787e-05	-2.11667	-1.0818	down	RNU1-5	26863	Homo sapiens RNA, U1 small nuclear 5 (RNU1-5), small nuclear RNA,	chr1	149224093	149224142	GTGCTGACCCCTGCGATTTCCCCAAATGTGGGAAACTCGACTGCATAATT
6840056	3.97393e-05	3.10427e-07	-2.11621	-1.08148	down	MYL6B	140465	Homo sapiens myosin, light chain 6B, alkali, smooth muscle and non-muscle (MYL6B), mRNA,	chr12	54837753	54837948	CTTGAAACACATCCTAAGCGTCTGAGTGCTGCAGATCCAGTGGGGTCCGG
5490477	3.84295e-05	2.77905e-07	-2.11528	-1.08085	down	EBPL	84650	Homo sapiens emopamil binding protein-like (EBPL), mRNA,	chr13	49133240	49133289	TTCCTCCCAGAGTGGCTCACCAGAAGCCCCAACCTCAACACCAGCAACTG
5310168	0.00222639	0.000245728	-2.11435	-1.08021	down	HLA-B	3106	Homo sapiens major histocompatibility complex, class I, B (HLA-B), mRNA,	chr6	31430029	31430260	CTGATGTGTCTCTCACAGCTTGAAAAGCCTGAGACAGCTGTCTTGTGAGG
130544	2.95154e-05	1.62858e-07	-2.11309	-1.07935	down	KIAA1160	57461	PREDICTED: Homo sapiens KIAA1160 protein (KIAA1160), mRNA,				GTTGACCGGAGGGTAGGGGTCTGTCCCTGGTCTTCCTGGTAGGTTTTGTA
6550180	5.23007e-05	5.52584e-07	-2.11133	-1.07815	down	ZMAT5	55954	Homo sapiens zinc finger, matrin type 5 (ZMAT5), transcript variant 1, mRNA,	chr22	30136670	30136719	GGCCAGTGCGACTTTGGCTCCAACTGCAGATTTTCCCACATGTCAGAGCG
4560528	4.67153e-05	4.37301e-07	-2.11077	-1.07777	down	POP5	51367	Homo sapiens processing of precursor 5, ribonuclease P/MRP subunit (S, cerevisiae) (POP5), transcript variant 3, mRNA,	chr12	121017088	121017137	GCAGAAGCAATGGAGTGAACCTCTGCTCCCCACACAGCTGGCTACACTGC
1050408	0.000271147	1.0594e-05	-2.10964	-1.077	down	SNURF	8926	Homo sapiens SNRPN upstream reading frame (SNURF), transcript variant 1, mRNA,	chr15	22751231	22751280	AGTGGAGCGGCCGCCGGAGATGCCTGACGCATCTGTCTGAGGAGCGGTCA
940669	3.3141e-05	2.03276e-07	-2.10741	-1.07547	down	TRPT1	83707	Homo sapiens tRNA phosphotransferase 1 (TRPT1), transcript variant 2, mRNA,	chr11	63747962	63748011	AGCCCCTTTCCTTGGCTGGTGATGAAGAGACAGAGTGTCAGAGTAGCCCC
3840474	0.00116382	9.61425e-05	-2.10654	-1.07487	down	LOC441481	441481	PREDICTED: Homo sapiens misc_RNA (LOC441481), miscRNA,				TTCGAGAAGGGCGAGGTGAACGGTGCGGGGGCGCACACTCTCTTTGCCTT
2190630	0.000252233	9.27338e-06	-2.10649	-1.07484	down	LOC391019	391019	PREDICTED: Homo sapiens misc_RNA (LOC391019), miscRNA,				ATGAAGGCCCAGGCTACAGCTGCAGCTTCAGTTCCAGTTCGGGCTCCCAG
4200367	0.0213246	0.0057052	-2.10577	-1.07435	down	C3orf54	389119	Homo sapiens chromosome 3 open reading frame 54 (C3orf54), mRNA,	chr3	49817311	49817360	TCATGCCCACCTCGCCCAGAACCTGAACTGCCTGCGGATGTCTCACGCTT
6100022	0.000231288	8.00344e-06	-2.10461	-1.07355	down	HIST2H2AC	8338	Homo sapiens histone cluster 2, H2ac (HIST2H2AC), mRNA,	chr1	148125457	148125506	CGCCCAGGGCGGCGTTTTGCCTAACATCCAGGCCGTTCTGTTACCAAAGA
2490379	0.000141892	3.55673e-06	-2.10393	-1.07309	down	RPL34	6164	Homo sapiens ribosomal protein L34 (RPL34), transcript variant 1, mRNA,	chr4	109770683	109770732	CAGTTGTGTGCATCTCTTTCCAGTTTTGCATCCAGTGACGTCTGCTTGGC
2850142	0.000234217	8.18783e-06	-2.10253	-1.07213	down	LOC100129650	100129650	PREDICTED: Homo sapiens misc_RNA (LOC100129650), miscRNA,				TCCCCGATTTAGACCTGCGGGTGCTTCCCCATGACCCCCACCAAAGCCCA
110110	0.00163517	0.000159255	-2.10072	-1.07088	down	HSPE1	3336	Homo sapiens heat shock 10kDa protein 1 (chaperonin 10) (HSPE1), mRNA,	chr2	198074081	198074130	CCGAGTATTGGTTGAAAGGAGTGCTGCTGAAACTGTAACCAAAGGAGGCA
6060719	0.000398602	1.91634e-05	-2.10014	-1.07049	down	RPL39L	116832	Homo sapiens ribosomal protein L39-like (RPL39L), mRNA,	chr3	188339722	188339771	TTTTCCGCCCGCGCCCCAGGCCCTTGCAGATCGAGATTTGCGTCCTAGAG
4760397	0.000460182	2.40166e-05	-2.0991	-1.06977	down	LOC100129086	100129086	PREDICTED: Homo sapiens similar to HIG1 domain family, member 1A (LOC100129086), mRNA,	chr12	51822097	51822146	AATCACTATGTCAACAGACACAGGTGTTTCCCTTCCTTCATATGAGGAAG
450598	0.000245877	8.9616e-06	-2.09896	-1.06968	down	PHF5A	84844	Homo sapiens PHD finger protein 5A (PHF5A), mRNA,	chr22	41855968	41856017	CTTGCAGCAGCTCTGGTGGCAGCTGTCCTTGAGGAACCTTTGGTGTGTGG
6860653	1.47165e-05	1.32518e-08	-2.09894	-1.06966	down	HBXIP	10542	Homo sapiens hepatitis B virus x interacting protein (HBXIP), mRNA,	chr1	110944148	110944197	ATGATCCAGAAACACGATGGCATCACGGTGGCAGTGCACAAAATGGCCTC
1940164	0.000237555	8.34663e-06	-2.09883	-1.06959	down	LSM5	23658	Homo sapiens LSM5 homolog, U6 small nuclear RNA associated (S, cerevisiae) (LSM5), mRNA,	chr7	32493381	32493430	GCTGGTTCCTGGAGGAGAAGGACCTGAAGTGTGAATGAGTTTCCTTGACT
460164	0.00268484	0.000322219	-2.09829	-1.06921	down	FTHL11	2503	Homo sapiens ferritin, heavy polypeptide-like 11 (FTHL11) on chromosome 8,	chr8	82596496	82596545	TGGGAGCGCCCGAATCTGGCTCGGCAGAATATCTCTTCGACAAGCACACC
520376	0.00100332	7.71568e-05	-2.09739	-1.0686	down	TMEM216	51259	Homo sapiens transmembrane protein 216 (TMEM216), mRNA,	chr11	60922728	60922777	TGAGCACGGAGAGCCTCATGTTGGTGGGTTTCCAGAGTGATGTGAAAGCC
4280189	0.00015077	3.9051e-06	-2.09728	-1.06852	down	LOC653557	653557	PREDICTED: Homo sapiens hypothetical LOC653557 (LOC653557), mRNA,	chr16	33412088	33417187	CCGGCGCAGGCCCAGGCTCCACTCCCCAGCTGTGAAAGGAGGAGCTCTAT
3450739	9.10555e-05	1.6336e-06	-2.09483	-1.06683	down	N6AMT2	221143	Homo sapiens N-6 adenine-specific DNA methyltransferase 2 (putative) (N6AMT2), mRNA,	chr13	21303191	21303240	CTGGGCTGGACTGTGGGATCTGATTACAGACGGTGACATAACACAGGAAG
6580131	4.03979e-05	3.27026e-07	-2.08938	-1.06308	down	MRPL22	29093	Homo sapiens mitochondrial ribosomal protein L22 (MRPL22), nuclear gene encoding mitochondrial protein, transcript variant 2, mRNA,	chr5	154326621	154326670	CGCAGCCGGACCATCGTTCACACTCTATGATGAGGAGATTCAGACTCCAC
2100079	0.000510643	2.82071e-05	-2.08561	-1.06047	down	DCI	1632	Homo sapiens dodecenoyl-Coenzyme A delta isomerase (3,2 trans-enoyl-Coenzyme A isomerase) (DCI), nuclear gene encoding mitochondrial protein, mRNA,	chr16	2290107	2293056	GGCCATTCCAGACCATGCTCGACAGCTGACCAAGGCCATGATGCGAAAGG
610400	3.42249e-05	2.19632e-07	-2.08497	-1.06002	down	C11orf1	64776	Homo sapiens chromosome 11 open reading frame 1 (C11orf1), mRNA,	chr11	111259711	111259760	AGCGAGAGCCTCACTGGTTCCCAGGACATCAACCTGAACTGGATCCTCCC
5270086	1.77464e-05	3.01958e-08	-2.08483	-1.05993	down	LOC645317	645317	PREDICTED: Homo sapiens similar to Coiled-coil-helix-coiled-coil-helix domain-containing protein 2 (HCV NS2 trans-regulated protein) (NS2TP), transcript variant 3 (LOC645317), mRNA,	chr1	15803612	15803661	AAGTCACTTAGCTCTTCGCTGGTTGTCACACGTCCGGAGGCCGAGCCGTC
6420603	0.000143172	3.60912e-06	-2.08405	-1.05939	down	LOC730255	730255	PREDICTED: Homo sapiens misc_RNA (LOC730255), miscRNA,				GTTGGGCATATCAAAGTGAACAAAGCACCTAAGATGCGCCGCTGGACCTG
5310241	2.95154e-05	1.6848e-07	-2.08313	-1.05875	down	TOMM5	401505	Homo sapiens translocase of outer mitochondrial membrane 5 homolog (yeast) (TOMM5), nuclear gene encoding mitochondrial protein, transcript variant 1, mRNA,	chr9	37592457	37592506	CGCCGAAGCTGGACCCGGAGGAGATGAAACGGAAGATGCGCGAGGATGTG
7550722	0.00015077	3.91624e-06	-2.08272	-1.05847	down	ZMYM6	9204	Homo sapiens zinc finger, MYM-type 6 (ZMYM6), mRNA,	chr1	35219996	35220045	ATCCAGGGTCAGCCAGTGTTGAAAGAGACATTTTGTCTACCTGGCACTGC
2260053	0.00120528	0.000100679	-2.08247	-1.05829	down	LOC128192	128192	PREDICTED: Homo sapiens hypothetical LOC128192 (LOC128192), mRNA,				GTGACTTCACATGCCATAATGGCACTGGTGGCAAGTACACCTGCGGGGAG
2000593	7.99731e-05	1.20923e-06	-2.08127	-1.05747	down	RPL17	6139	Homo sapiens ribosomal protein L17 (RPL17), mRNA,	chr18	45272145	45272194	CTGGATTGGTGAGGCCCGTGTGGCTACTTCTGTGGAAGCAGTGCTGTAGT
6200669	0.00258448	0.0003059	-2.07868	-1.05567	down	HIST1H2BD	3017	Homo sapiens histone cluster 1, H2bd (HIST1H2BD), transcript variant 2, mRNA,	chr6	26158384	26158433	CTATTAACGCTACGATGCCTGAACCTACCAAGTCTGCTCCTGCCCCAAAG
2450368	8.11486e-05	1.27259e-06	-2.07269	-1.0515	down	GTF2A2	2958	Homo sapiens general transcription factor IIA, 2, 12kDa (GTF2A2), mRNA,	chr15	57721744	57730199	GCAGCACTGGCTCAGAGGGTCAGGAACAGAGTCAATTTCAGGGGCTCTCT
1980500	1.77464e-05	3.20513e-08	-2.07233	-1.05125	down	ZMAT2	153527	Homo sapiens zinc finger, matrin type 2 (ZMAT2), mRNA,	chr5	140066112	140066161	GCATTGCTGCCCTGGGGCCTGATGTTCTTGGCTTCCTCAGAGCATGTAAC
7380367	8.88493e-05	1.54671e-06	-2.07138	-1.05059	down	C9orf69	90120	Homo sapiens chromosome 9 open reading frame 69 (C9orf69), mRNA,	chr9	139006699	139006748	GCAGGTAGGCGGGAGCTTCCCTGCGTGGGCCTCATTTCTTGCTGCAGAGA
5960224	0.000576537	3.42386e-05	-2.07073	-1.05014	down	PTTG3P	26255	Homo sapiens pituitary tumor-transforming 3 (pseudogene) (PTTG3P), non-coding RNA,	chr8	67842374	67842423	GCTTCGAGAGTTTTGACCTGCCTGAAGAGCACCAGATTGCACATCTCCCC
2490341	0.000958259	7.22008e-05	-2.06993	-1.04958	down	LOC100129742	100129742	PREDICTED: Homo sapiens misc_RNA (LOC100129742), miscRNA,				TGGAGCTTCATGGTGAAGGTAGTAGTACTGGAAAAGCCACTGGGGATGAG
1940132	0.00168729	0.000166127	-2.06906	-1.04898	down	CD151	977	Homo sapiens CD151 molecule (Raph blood group) (CD151), transcript variant 4, mRNA,	chr11	824533	824582	AGAGTCCTGGGGAGCTTCTGTCCACCTGTCCTGCAGAGGAGTCGTTTCCA
4040176	0.0110303	0.00232085	-2.06727	-1.04772	down	LAMA5	3911	Homo sapiens laminin, alpha 5 (LAMA5), mRNA,	chr20	60884288	60884337	CCTTGTGCTCGCCTCATAGGTGTCTATTTGGACTCTAAGCTCTACGGGTG
1240221	0.000102534	2.07939e-06	-2.06626	-1.04702	down	POLR2H	5437	Homo sapiens polymerase (RNA) II (DNA directed) polypeptide H (POLR2H), mRNA,	chr3	184086199	184086248	GGCGGCATCTTTAACTGGCCTCCACTCAATGGGAAACTGACTCGCCTGTG
20491	3.34919e-05	2.09244e-07	-2.06591	-1.04678	down	UBE2F	140739	Homo sapiens ubiquitin-conjugating enzyme E2F (putative) (UBE2F), mRNA,	chr2	238614821	238614870	CCCCTGGATTGCCCCAGTCCTGTGACCATGTTGCCCTGAAGAAGACCATC
4540349	6.22076e-05	7.63121e-07	-2.06552	-1.0465	down	LSM2	57819	Homo sapiens LSM2 homolog, U6 small nuclear RNA associated (S, cerevisiae) (LSM2), mRNA,	chr6	31873174	31873223	CCAGGGCAGCATGTGATTCATTTGGGGATGGAAGGAATCTGTCCCGCATC
4180603	0.000293496	1.20816e-05	-2.06433	-1.04567	down	GAL3ST4	79690	Homo sapiens galactose-3-O-sulfotransferase 4 (GAL3ST4), mRNA,	chr7	99756965	99757014	CCTAGAGGGGCAAAAGATGGAGTGAGCCACAGGAAGTTTGGGGCGTGGTG
7400719	3.84295e-05	2.77147e-07	-2.06423	-1.0456	down	EXOSC1	51013	Homo sapiens exosome component 1 (EXOSC1), mRNA, XM_944315 XM_944318 XM_944323	chr10	99196160	99195709	ACACCAAGATGCTGCTGTCTTTATTCAAACACCTGGCGTCGGCCAACAGC
5570519	3.92471e-05	2.93605e-07	-2.06348	-1.04508	down	LOC401397	401397	PREDICTED: Homo sapiens hypothetical LOC401397 (LOC401397), mRNA,	chr7	112544631	112544680	GGCCTACTGAGTCAAACCTCACCCTGAAAACCTTTGCGCTTTAGAGGCTA
7210484	1.77464e-05	3.70149e-08	-2.06171	-1.04384	down	C6orf108	10591	Homo sapiens chromosome 6 open reading frame 108 (C6orf108), transcript variant 2, mRNA,	chr6	43301527	43301576	GGAGCAGCAGATGGCTCTCGGTTCCAGGTGTGGGACTATGAGGAGGGAGA
1230458	0.000272088	1.0712e-05	-2.06104	-1.04337	down	AES	166	Homo sapiens amino-terminal enhancer of split (AES), transcript variant 2, mRNA,	chr19	3053260	3053309	AGTTCCAGACACCTCCACGCCCACCTGGTCCTCTCCCATCGCCCACAAAA
4670048	0.000472453	2.4992e-05	-2.05772	-1.04105	down	RPS26L	400156	Homo sapiens 40S ribosomal protein S26-like (RPS26L), non-coding RNA,	chr13	99990206	99990255	TCGATCTCGTGAAGCCCGCAAGGACCGAACACCCCCACCTCGATTTAGAC
4920408	0.000268731	1.03901e-05	-2.05769	-1.04102	down	RPL23A	6147	Homo sapiens ribosomal protein L23a (RPL23A), mRNA,	chr17	24075261	24075310	GAACTCAGAACTTGCCTCCATGGTTGAGTAACAAGCTGTACAAGAACCCC
1820072	0.00103565	8.05617e-05	-2.05696	-1.04051	down	PPP2R3C	55012	Homo sapiens protein phosphatase 2 (formerly 2A), regulatory subunit B'', gamma (PPP2R3C), mRNA,	chr14	35564269	35564318	GCTACCATGACCAATGTCTTCTTAGACCGTGTTTTCCAGGAGTGTCTCAC
5340129	0.00388393	0.000543379	-2.05569	-1.03962	down	AKR1C2	1646	Homo sapiens aldo-keto reductase family 1, member C2 (dihydrodiol dehydrogenase 2; bile acid binding protein; 3-alpha hydroxysteroid dehydrogenase, type III) (AKR1C2), transcript variant 1, mRNA, XM_943424 XM_943425 XM_943427	chr10	5036139	5036188	CCTGCTTGGCGACTTCAGTAAGCTACAGCTAAGCCCATCGGCCGGAAAAG
7380110	0.000158239	4.24139e-06	-2.05526	-1.03932	down	CDK4	1019	Homo sapiens cyclin-dependent kinase 4 (CDK4), mRNA,	chr12	58142207	58142256	GGACACTGAGAGGGCAATCTTTGCCTTTATCTCTGAGGCTATGGAGGGTC
4560367	0.000135445	3.22705e-06	-2.05504	-1.03917	down	NDUFA8	4702	Homo sapiens NADH dehydrogenase (ubiquinone) 1 alpha subcomplex, 8, 19kDa (NDUFA8), nuclear gene encoding mitochondrial protein, mRNA,	chr9	124906468	124906517	GATGGGTCCGTGGCCCACACTCGGTCATGTGCTCAGACAACGACTGATGA
630735	3.53245e-05	2.35251e-07	-2.05426	-1.03862	down	COX17	10063	Homo sapiens COX17 cytochrome c oxidase assembly homolog (S, cerevisiae) (COX17), nuclear gene encoding mitochondrial protein, mRNA,	chr3	120878850	120878899	GAGGCTGGCATAGATTTGGCTGTCTCCGCTCATAGCTGCTTTTGGCGCGA
7040670	0.0117413	0.00253407	-2.05419	-1.03857	down	DHRS3	9249	Homo sapiens dehydrogenase/reductase (SDR family) member 3 (DHRS3), mRNA,	chr1	12628133	12628182	TGACCCCCACAGGGAGGCAGGAAAACAGCCAGAAGCCACCTTGACACTTT
1110228	3.87165e-05	2.86891e-07	-2.05367	-1.0382	down	TMEM136	219902	Homo sapiens transmembrane protein 136 (TMEM136), mRNA,	chr11	119706365	119706414	CCATGCTTGGAGAAGCAGGCGGAGTGAGGAACGGCAGCTGAAACACAACG
5810414	0.000283155	1.14547e-05	-2.05313	-1.03782	down	CYB5A	1528	Homo sapiens cytochrome b5 type A (microsomal) (CYB5A), transcript variant 2, mRNA,	chr18	71959023	71959072	CCCTAGAGGAGATTCAGAAGCACAACCACAGCAAGAGCACCTGGCTGATC
150750	5.94662e-05	7.02083e-07	-2.05205	-1.03706	down	LOC347292	347292	PREDICTED: Homo sapiens similar to ribosomal protein L36 (LOC347292), mRNA,	chr9	110429147	110429196	TTTATCAAGAAAAGGGTGGGGATGCACATCCGCGCCAAGAGGAAGCAGGA
3800445	3.3106e-05	2.01887e-07	-2.05057	-1.03602	down	MRPL24	79590	Homo sapiens mitochondrial ribosomal protein L24 (MRPL24), nuclear gene encoding mitochondrial protein, transcript variant 2, mRNA,	chr1	154974526	154974783	GGGTGGTCGTGGGAGGGCTGAACACACATTACCGCTACATTGGCAAGACC
6770608	0.000182805	5.64522e-06	-2.05032	-1.03585	down	BNIP3	664	Homo sapiens BCL2/adenovirus E1B 19kDa interacting protein 3 (BNIP3), nuclear gene encoding mitochondrial protein, mRNA,	chr10	133781337	133781386	CACCCTGGATGATCAGTTTTCTGCTGAAGGCACCTACTCAGTATCTTTTC
130673	5.52563e-05	6.17115e-07	-2.05022	-1.03578	down	NHP2	55651	Homo sapiens NHP2 ribonucleoprotein homolog (yeast) (NHP2), transcript variant 1, mRNA,	chr5	177577929	177577978	AGGAGACACACTGCCCATTGAGGTATACTGCCATCTCCCAGTCATGTGTG
2970739	1.77464e-05	2.66937e-08	-2.04761	-1.03394	down	LOC100128353	100128353	PREDICTED: Homo sapiens misc_RNA (LOC100128353), miscRNA,				TGGGAGAATGTAATCATTCCTTCCGCAACTGCTGCATGTCCCTGTGGGTG
1660608	0.000127551	2.93496e-06	-2.04723	-1.03367	down	C7orf55	154791	Homo sapiens chromosome 7 open reading frame 55 (C7orf55), mRNA,	chr7	138680945	138680994	TCTCAAGTTGCCCCATCAGCCTGGAGGGAAGGGCTGGGAGCCATGAACAT
5550113	0.000159688	4.3029e-06	-2.04707	-1.03356	down	LOC729340	729340	PREDICTED: Homo sapiens misc_RNA (LOC729340), miscRNA,				GAGCACATCCAAGTGAACAAAACACCTAAGATGCGCCGCCGGACCCACAG
6200561	0.000647766	4.0926e-05	-2.04689	-1.03343	down	CCDC28B	79140	Homo sapiens coiled-coil domain containing 28B (CCDC28B), mRNA,	chr1	32442498	32442547	CACTGAGGGGCTGCCAGAGGAGCAGAAGAAGACAATGGCTGACCGTAACC
4050370	0.000475138	2.53025e-05	-2.04589	-1.03273	down	METTL5	29081	Homo sapiens methyltransferase like 5 (METTL5), mRNA,	chr2	170678467	170678516	GTCGTTGCAGATCTAGGATGTGGTTGTGGAGTACTTAGCATCGGAACTGC
4490739	0.00139029	0.000124611	-2.0438	-1.03126	down	PPAP2A	8611	Homo sapiens phosphatidic acid phosphatase type 2A (PPAP2A), transcript variant 2, mRNA,	chr5	54822617	54822666	GCCAGGATGAAGGGAGACTGGGCAAGACTCTTACGCCCCACACTGCAATT
2680095	8.06473e-05	1.25489e-06	-2.04332	-1.03091	down	LOC392285	392285	PREDICTED: Homo sapiens misc_RNA (LOC392285), miscRNA,	chr9	7588186	7588235	GCTGAACCCAACACAAACGGTTCCCAGTTTTTTCATCTGCACTGCCAAGA
5360521	7.74207e-05	1.14738e-06	-2.04166	-1.02975	down	SFT2D1	113402	Homo sapiens SFT2 domain containing 1 (SFT2D1), mRNA,	chr6	166738045	166739630	CCCTGTGTGCTGCTCTTTGGTGGCATAAGAAGGGACTGGCTGTGTTATTC
6130259	0.000885268	6.39665e-05	-2.03949	-1.02821	down	LOC402644	402644	PREDICTED: Homo sapiens similar to peptidylprolyl isomerase A isoform 1 (LOC402644), mRNA,				CGTTGCTGTCGACAGTGAGCCCTTGGACCACGTCTCCTTTGAGCTGTTTG
6450524	0.0028638	0.000353038	-2.03947	-1.02819	down	LOC653737	653737	PREDICTED: Homo sapiens hypothetical LOC653737 (LOC653737), mRNA,	chr16	9158248	9158756	GGGCCGAAGGAGTTTGCAGCCTTTCGGCCGGAACTGCCATCTTCCAGTAA
10435	0.00078765	5.42321e-05	-2.03899	-1.02785	down	LYRM5	144363	Homo sapiens LYR motif containing 5 (LYRM5), mRNA,	chr12	25249029	25249078	ATGTATGGAGTCATTACTTCTGACCTTGAAATAGCCTGCTGGTGACTGGC
7510414	0.000576998	3.42864e-05	-2.038	-1.02716	down	IGFBP4	3487	Homo sapiens insulin-like growth factor binding protein 4 (IGFBP4), mRNA,	chr17	35867284	35867333	ACCGGGATGAACCTATCCTTCCAGTGGCTCGCTCCCTGTAGCTCTGCCTC
7320722	9.00801e-05	1.58328e-06	-2.03783	-1.02703	down	LOC727984	727984	PREDICTED: Homo sapiens misc_RNA (LOC727984), miscRNA,	chr5	55468914	55468963	TGGGAACAAAGCACCTAAGATGTGCCCCTGGACCTACAGAGCTCATGGTC
7000577	0.000596511	3.6165e-05	-2.03713	-1.02654	down	GYPC	2995	Homo sapiens glycophorin C (Gerbich blood group) (GYPC), transcript variant 2, mRNA,	chr2	127170296	127170345	CTTGATTCTTCCCGAGATAGCCACCTGGAAACACTAGGTGCCTGCCCAGG
1740273	0.0016008	0.000155227	-2.0371	-1.02652	down	SNRPN	6638	Homo sapiens small nuclear ribonucleoprotein polypeptide N (SNRPN), transcript variant 2, mRNA,	chr15	22774558	22774695	GGTCCACCTCCCCCAGGAATGCGTCCACCAAGACCTTAGCATACTGTTGA
6580369	5.2255e-05	5.48914e-07	-2.03643	-1.02604	down	DYNLRB1	83658	Homo sapiens dynein, light chain, roadblock-type 1 (DYNLRB1), mRNA,	chr20	32567868	32567917	AGAAAGGCACAGGACTCGCTAAGTGTTCGCTACGCGGGGCTACCGGATCG
6180088	8.12334e-05	1.30469e-06	-2.03508	-1.02509	down	ATP6V0E2	155066	Homo sapiens ATPase, H+ transporting V0 subunit e2 (ATP6V0E2), transcript variant 1, mRNA,	chr7	149208621	149208670	TCTGAGCCTCCGTCGCCCCTCCTGTTGGGTAAGGGTGTTGAGTGTGACTT
7050370	0.000167204	4.7407e-06	-2.03461	-1.02476	down	ANKRD9	122416	Homo sapiens ankyrin repeat domain 9 (ANKRD9), mRNA,	chr14	102973237	102973286	ACTGGCAAAGGCTAGGCCCGGAGCACCCTAGGCGCTGGATTTTGGGACAA
6760021	0.000426698	2.13614e-05	-2.03405	-1.02435	down	SNHG7	84973	Homo sapiens small nucleolar RNA host gene 7 (non-protein coding) (SNHG7), transcript variant 1, non-coding RNA,	chr9	139621498	139622341	GGGAAGCCTGGACGTCTGCTCACTGGAGATGACACGTGCGTGGGGTGTTG
1190110	7.97025e-05	1.19815e-06	-2.03032	-1.02171	down	VPS28	51160	Homo sapiens vacuolar protein sorting 28 homolog (S, cerevisiae) (VPS28), transcript variant 1, mRNA,	chr8	145649192	145649241	GCTGTTCGACCTGGAGTCAGCCTACAACGCCTTCAACCGCTTCCTGCATG
4260612	8.57566e-05	1.44423e-06	-2.02992	-1.02142	down	STK19	8859	Homo sapiens serine/threonine kinase 19 (STK19), transcript variant 1, mRNA,	chr6	31949043	31949092	GGAAAGTGGAACCAGAAATGGTGCCAAGGCTGTGGCTGTTCCCTTTCGTG
2490202	0.000551011	3.16769e-05	-2.02879	-1.02062	down	TMEM219	124446	Homo sapiens transmembrane protein 219 (TMEM219), transcript variant 1, mRNA,	chr16	29890307	29890356	TGTCACTGCTATGTGCTTCCACCCGCGCCGGGAGTCCCACTGGTCTAGAA
2480291	9.89507e-05	1.91988e-06	-2.0283	-1.02027	down	SNRPN	6638	Homo sapiens small nuclear ribonucleoprotein polypeptide N (SNRPN), transcript variant 3, mRNA,	chr15	22770551	22770600	GCTCCATCTACTCTTTGAAGCTTCTGCCCAGCTTGCATTGTTTCTAGGAG
5670093	2.76549e-05	1.3727e-07	-2.02778	-1.0199	down	ECHS1	1892	Homo sapiens enoyl Coenzyme A hydratase, short chain, 1, mitochondrial (ECHS1), nuclear gene encoding mitochondrial protein, mRNA,	chr10	135026102	135026151	TCTAAGATTCTGCTGAGGAGCCCCCGCTGGTCCCTCTGGGCATGCTGTGC
4730224	0.00312788	0.000401784	-2.02669	-1.01913	down	LYPLAL1	127018	Homo sapiens lysophospholipase-like 1 (LYPLAL1), mRNA,	chr1	217450596	217451489	AGCATCTGCTGTTTACCAGGCTCTTCAGAAGAGTAATGGTGTACTTCCTG
1050187	0.000236991	8.31e-06	-2.02657	-1.01904	down	MRPL11	65003	Homo sapiens mitochondrial ribosomal protein L11 (MRPL11), nuclear gene encoding mitochondrial protein, transcript variant 2, mRNA,	chr11	65959975	65960024	AAGGAGGTAGTTGCAAAAGCTGTGCCCAAGGGGAGGAAGGAGGTCACACC
3460278	0.00438821	0.000647535	-2.0264	-1.01892	down	C22orf13	83606	Homo sapiens chromosome 22 open reading frame 13 (C22orf13), mRNA,	chr22	24936581	24936630	CCAGAGAGCCTGGACATCAGGGACTTTTGCCCACAGCACATGACACCGAC
7100280	0.000158353	4.25006e-06	-2.02564	-1.01838	down	C11orf48	79081	Homo sapiens chromosome 11 open reading frame 48 (C11orf48), mRNA,	chr11	62430619	62430744	GATCCGGCTTGCCCAGAAAGAGAAGACAGCCATGGAAGTGGAAGCCCCTT
6350292	0.000321389	1.39035e-05	-2.02532	-1.01815	down	C1orf50	79078	Homo sapiens chromosome 1 open reading frame 50 (C1orf50), mRNA,	chr1	43013681	43013730	GGACCTGGCTGTCAACCTCCTTGTTGCCCCCACTGTTGCCTTGAGAATTG
1110349	4.48219e-05	4.02054e-07	-2.02378	-1.01705	down	C21orf57	54059	Homo sapiens chromosome 21 open reading frame 57 (C21orf57), transcript variant 1, mRNA,	chr21	46535686	46535735	CAGGTGAATTTCCCCAGCCTGATTTTCCAGATGACTACAATTTGGGAGAC
5910041	0.00141641	0.000127806	-2.02285	-1.01639	down	RPL23AP7	118433	Homo sapiens ribosomal protein L23a pseudogene 7 (RPL23AP7), non-coding RNA,	chr2	114099751	114101108	CCGCCCGCCTAGAGGGAGTGGAGCGAGAGCCTACGACTAGATTTGCATCT
6860452	0.000596911	3.62104e-05	-2.02248	-1.01612	down	PDCD2	5134	Homo sapiens programmed cell death 2 (PDCD2), transcript variant 1, mRNA,	chr6	170886712	170886761	GCAAGAGCATTGACTGGGGCATCCTGGCTGTCTTCACCTGTGCTGAGAGC
1500358	0.00580546	0.000961231	-2.02206	-1.01583	down	ANKRD29	147463	Homo sapiens ankyrin repeat domain 29 (ANKRD29), mRNA,	chr18	21180277	21180326	TGAGTTTCCAACACCGTGCTGCTTGATAGAATGACTTTGAGGTCCTTGGA
7610747	2.12871e-05	6.96013e-08	-2.02158	-1.01548	down	MRPL24	79590	Homo sapiens mitochondrial ribosomal protein L24 (MRPL24), nuclear gene encoding mitochondrial protein, transcript variant 1, mRNA,	chr1	154973926	154974086	TGGCATCGTCCCTGAAACGTGGATTGATGGCCCCAAAGACACATCAGTGG
3850273	0.000554799	3.20428e-05	-2.02129	-1.01528	down	PEBP1	5037	Homo sapiens phosphatidylethanolamine binding protein 1 (PEBP1), mRNA,	chr12	117067523	117067572	GTATGTCACTCTGGTCCCTTTAAAGAGCAATCCTGGAAGAAGCAGGAGGG
990500	0.000403852	1.95692e-05	-2.02035	-1.0146	down	AVPI1	60370	Homo sapiens arginine vasopressin-induced 1 (AVPI1), mRNA,	chr10	99427209	99427258	ACTGTAAACCATGGTTCCAGCAGCCTGTTCCACACCCCCACACCATCAGG
1850468	4.58666e-05	4.19557e-07	-2.01911	-1.01372	down	CCDC56	28958	Homo sapiens coiled-coil domain containing 56 (CCDC56), mRNA,	chr17	40949725	40949774	CCCCTTCACCTTCCAGGGACGCAGTTGTTACGAGGTTAGACGTGGCAGCT
7560114	0.000313526	1.34948e-05	-2.01884	-1.01353	down	KLHDC8B	200942	Homo sapiens kelch domain containing 8B (KLHDC8B), mRNA,	chr3	49188720	49188769	GGAGTTCAAGTGGAGGAATGCTGGCTTTGAGCCCTCTACACTGCTGGTTG
6180408	1.47165e-05	1.27205e-08	-2.01827	-1.01312	down	NOSIP	51070	Homo sapiens nitric oxide synthase interacting protein (NOSIP), mRNA,	chr19	54751446	54751618	TCTGGGGCTGTGGTCACCCTCGAATGCGTGGAGAAGCTGATTCGGAAGGA
460379	9.00801e-05	1.60781e-06	-2.01725	-1.01239	down	IFI27L1	122509	Homo sapiens interferon, alpha-inducible protein 27-like 1 (IFI27L1), transcript variant 1, mRNA,	chr14	94568918	94568967	CCACACTGAGGCAGGGAGTTGGCTCTCTTGGTGGAGATGACTTTCCTGGG
6480184	0.000173907	5.17802e-06	-2.0164	-1.01178	down	LSMD1	84316	Homo sapiens LSM domain containing 1 (LSMD1), mRNA,	chr17	7760432	7760481	AGCGCGCCCGACAGCAGCTAGAGGCGCTGCTCAACAAGACTATGCGCATT
5260014	0.000443687	2.27467e-05	-2.01616	-1.01161	down	CDKN3	1033	Homo sapiens cyclin-dependent kinase inhibitor 3 (CDK2-associated dual specificity phosphatase) (CDKN3), mRNA,	chr14	53948082	53948131	CGCAGATGGAGGGACTCCTGACATAGCCAGCTGCTGTGAAATAATGGAAG
840014	0.00110554	8.81927e-05	-2.01565	-1.01124	down	TPMT	7172	Homo sapiens thiopurine S-methyltransferase (TPMT), mRNA,	chr6	18236681	18236730	AAACACCCTGTGTCCATGGGATAGAGTCCTTTCCGCTTGCAGTTGTGCCC
1690025	0.00147313	0.000136982	-2.01541	-1.01108	down	MCTS1	28985	Homo sapiens malignant T cell amplified sequence 1 (MCTS1), mRNA,	chrX	119628902	119628951	GGCAGAAGGAAAACAGCATGCTCTATGTGTTGGAGTCATGAAGATGTCTG
6130390	5.13787e-05	5.34938e-07	-2.01445	-1.01039	down	RPL26L1	51121	Homo sapiens ribosomal protein L26-like 1 (RPL26L1), mRNA,	chr5	172328135	172328184	TCATCTACATCGAGCGGGTGCAGCGTGAGAAGGCCAACGGCACAACTGTC
630278	0.00032316	1.40355e-05	-2.01401	-1.01007	down	H1F0	3005	Homo sapiens H1 histone family, member 0 (H1F0), mRNA,	chr22	36533168	36533217	TCTAGGGCTAGTACTTAGTTTCACACCCGGGAGCTGGGAGAAAAAACCTG
70433	0.000554786	3.20224e-05	-2.01399	-1.01006	down	SMPD1	6609	Homo sapiens sphingomyelin phosphodiesterase 1, acid lysosomal (SMPD1), transcript variant ASM-1, mRNA,	chr11	6371028	6371077	GGGGTTCTATGCTCTTTCCCCATACCCCGGTCTCCGCCTCATCTCTCTCA
2140154	1.46335e-05	3.96935e-09	-2.01383	-1.00994	down	CYB5A	1528	Homo sapiens cytochrome b5 type A (microsomal) (CYB5A), transcript variant 2, mRNA,	chr18	71920764	71920813	CTCCTCAGAAGTCAGCGCAGGAAGAGCCTGCTTTGGACACGGGAGAAAAG
6510156	0.000501827	2.73999e-05	-2.01341	-1.00964	down	SNORA12	677800	Homo sapiens small nucleolar RNA, H/ACA box 12 (SNORA12), small nucleolar RNA,	chr10	101996916	101996965	GACGGAGATATCTCTCTTAAGCCTTTCCTGCATCAGAGAATGGCTCCCAC
770164	0.000168382	4.81773e-06	-2.01189	-1.00855	down	RPAIN	84268	Homo sapiens RPA interacting protein (RPAIN), transcript variant 2, mRNA,	chr17	5272253	5276632	CTGGCCTGTGATACTTGGGCTGTGATCCTCTAGAGCCAGCTTGGACTCAC
6560066	1.47165e-05	8.26921e-09	-2.01108	-1.00797	down	MTHFS	10588	Homo sapiens 5,10-methenyltetrahydrofolate synthetase (5-formyltetrahydrofolate cyclo-ligase) (MTHFS), mRNA,	chr15	77924696	77924745	AGCGCTGTTTGCAGCATCAGGAAGTGAAGCCCTACACCCTGGCGTTGGCT
2070746	0.00015077	3.90823e-06	-2.01096	-1.00788	down	RBX1	9978	Homo sapiens ring-box 1 (RBX1), mRNA,	chr22	39679580	39690042	CTTTGCATAGAATGTCAAGCTAACCAGGCGTCCGCTACTTCAGAAGAGTG
5080682	0.00276852	0.000336384	-2.0102	-1.00734	down	CTDSP1	58190	Homo sapiens CTD (carboxy-terminal domain, RNA polymerase II, polypeptide A) small phosphatase 1 (CTDSP1), transcript variant 1, mRNA,	chr2	218978717	218978766	CGGTTAAGGGGACCCACATACCAGTGCCAAGGGGGATGTCAAGTGGTGAT
6960373	0.000124098	2.8203e-06	-2.01019	-1.00733	down	LOC644191	644191	PREDICTED: Homo sapiens similar to hCG15685, transcript variant 1 (LOC644191), mRNA,	chr17	41041729	41041778	AAAAGAAGGAACAATGGTCGTGCCAAAAAGGGCCGCGGCCACGTGCAGCC
4640634	0.00874663	0.00170303	-2.00976	-1.00702	down	SNX21	90203	Homo sapiens sorting nexin family member 21 (SNX21), transcript variant 3, mRNA,	chr20	43903518	43903567	GAGCTAGGCTCAGGGTGAGCTTTGGCTGGGGTTGCCCTTGTGTAGTACAG
1690435	0.000551671	3.17448e-05	-2.00945	-1.0068	down	LOC441506	441506	PREDICTED: Homo sapiens misc_RNA (LOC441506), miscRNA,	chr16	72532318	72532367	GTGACACCATTTCCCATGAACACCCCTGGGAGGTCATGCCTCAGCTCTGC
380102	0.000598126	3.63477e-05	-2.00912	-1.00656	down	TMEM51	55092	Homo sapiens transmembrane protein 51 (TMEM51), mRNA,	chr1	15419242	15419291	CTACGCTGGAGTCCTGAACTGTGGGTAGAAAACACGACCTGGCTTTGTAG
7380491	0.000403852	1.95515e-05	-2.00868	-1.00625	down	MRPS33	51650	Homo sapiens mitochondrial ribosomal protein S33 (MRPS33), nuclear gene encoding mitochondrial protein, transcript variant 1, mRNA,	chr7	140360855	140360904	TTCTCTGCTCATCACACGGCCTTCGGCACTGTAGCTTTGGGTGGTGGGCT
2680170	0.000202491	6.52594e-06	-2.00633	-1.00456	down	HSPE1	3336	Homo sapiens heat shock 10kDa protein 1 (chaperonin 10) (HSPE1), mRNA,	chr2	198073376	198074059	GCAGAGTACGAGTCTGAGGCGGAGGGAGTAATGGCAGGACAAGCGTTTAG
3520711	0.000118876	2.60374e-06	-2.00419	-1.00302	down	MPV17	4358	Homo sapiens MpV17 mitochondrial inner membrane protein (MPV17), nuclear gene encoding mitochondrial protein, mRNA,	chr2	27532630	27532679	TGGGTTGCCGGTCAGAGCTTAAGAGGACTAGCACCCTGCAATGCCCCTCT
1500041	9.10555e-05	1.63845e-06	-2.00388	-1.0028	down	TMEM93	83460	Homo sapiens transmembrane protein 93 (TMEM93), transcript variant 2, mRNA,	chr17	3518877	3518926	CGCGGGCATTTCTTCCACTGCCCGTCTGAGGGAACGCTAAGTAGTGTGTC
1710168	4.03979e-05	3.38022e-07	-2.00325	-1.00234	down	NDUFS3	4722	Homo sapiens NADH dehydrogenase (ubiquinone) Fe-S protein 3, 30kDa (NADH-coenzyme Q reductase) (NDUFS3), mRNA,	chr11	47562579	47562628	AGCCGGAGACAAGAAGCCTGATGCCAAGTAGCTCCAGGGAACGCATGTGG
5080600	7.67036e-05	1.12574e-06	-2.0022	-1.00159	down	LOC100132457	100132457	PREDICTED: Homo sapiens similar to Sm protein G (LOC100132457), mRNA,				GGCTGTTCAGCAGAGAAACCCATGTCCTCTCTTCATAGGTTCTATTTTAC
2340474	0.000336831	1.49994e-05	-2.00204	-1.00147	down	SERF1B	728492	Homo sapiens small EDRK-rich factor 1B (centromeric) (SERF1B), mRNA,	chr5	69321156	69321205	AGCCGGGCGGAGGGCCCACGAGGGCTCAGCCTTCCCGGTCAGCGGTGGTG
7320187	4.89756e-05	4.82724e-07	-2.00038	-1.00027	down	DCTN3	11258	Homo sapiens dynactin 3 (p22) (DCTN3), transcript variant 1, mRNA,	chr9	34613805	34613854	CCAAGCAATTCGTGCAGTGGGATGAGCTACTTTGCCAGCTAGAGGCCGCC

## Sheet: moR103 vs neg1, 117 genes up
ProbeID	p (Benjamini Hochberg FDR corrected)	p	FC ([moR103] vs [neg1])	Log FC ([moR103] vs [neg1])	Regulation ([moR103] vs [neg1])	Symbol	Entrez_Gene_ID	Definition	Chromosome	Chromosome Start Index(Avadis)	Chromosome End Index(Avadis)	Probe_Sequence
770221	0.00015512	4.1138e-06	4.56025	2.18911	up	C20orf177	63939	Homo sapiens chromosome 20 open reading frame 177 (C20orf177), mRNA,	chr20	57955529	57955578	GCTGAGTTGCTGCCTTTCCCCGTCATGTATCCATGTGCATGCTCTTAGAG
1510736	0.000203695	6.68751e-06	3.90783	1.96637	up	KLC1	3831	Homo sapiens kinesin light chain 1 (KLC1), transcript variant 1, mRNA,	chr14	103222158	103222207	GCTCGGACTCCGGGTCTCCCTAGGATATGCCCCAGTAGCATTTGCTGTGT
4860239	0.0015301	0.000144358	3.71665	1.894	up	WDR1	9948	Homo sapiens WD repeat domain 1 (WDR1), transcript variant 1, mRNA,	chr4	10099367	10099416	CATACCGGCTGGCCACGGGAAGCGATGATAACTGCGCGGCATTCTTTGAG
1300470	0.000300853	1.26573e-05	3.57116	1.83639	up	MAMDC2	256691	Homo sapiens MAM domain containing 2 (MAMDC2), mRNA,	chr9	72031386	72031435	ACAAGGCAATGCTACCTTCTTTATTCCCCCTTTGAACTACCTTTGAAGTC
380327	0.000423094	2.1039e-05	3.36435	1.75033	up	LOC730820	730820	PREDICTED: Homo sapiens similar to nuclear receptor binding factor 2 (LOC730820), mRNA,				GGTGGACTGTGGGAGCAGAGGCATTGCCAGGACTTGGGAAACAGTCACTG
4040519	0.00220263	0.000242012	2.97049	1.5707	up	LOC728059	728059	PREDICTED: Homo sapiens misc_RNA (LOC728059), miscRNA,				GTCAAACAATGTCAGATACCACATTCAAGGTCTTGCGCCGGCAGCTTCCG
4570181	0.00271891	0.000328139	2.89283	1.53248	up	GAS6	2621	Homo sapiens growth arrest-specific 6 (GAS6), mRNA,	chr13	113547353	113562926	CGAGGAGGCGCGGGAGGTGTTCGAGAACGACCCCGAGACGGATTATTTTT
5860463	0.000295299	1.22111e-05	2.81777	1.49455	up	NEK6	10783	Homo sapiens NIMA (never in mitosis gene a)-related kinase 6 (NEK6), mRNA,	chr9	126154389	126154438	GGGCGGCTGCTGTTTCCACACGTGGACTCGGATCTGCTGTGACACCGTCA
5570102	0.002162	0.000235081	2.8069	1.48898	up	DKK1	22943	Homo sapiens dickkopf homolog 1 (Xenopus laevis) (DKK1), mRNA,	chr10	53746711	53746760	CCTGGAGTGTAAGAGCTTTGTTTCTTTATGGAACTCCCCTGTGATTGCAG
2320343	0.00104546	8.16945e-05	2.75418	1.46162	up	MAMLD1	10046	Homo sapiens mastermind-like domain containing 1 (MAMLD1), mRNA,	chrX	149432768	149432817	GCTTGTGTGCACCCTCGTGGGGTTAAGGCGAGCTGTTCCTGGTTTAAAGC
1170445	0.00221896	0.000244514	2.68866	1.42689	up	CADM1	23705	Homo sapiens cell adhesion molecule 1 (CADM1), transcript variant 1, mRNA,	chr11	115045088	115045137	CTGCAGCTCTATTCCGAGCCCTTAGCACCCATTCCGACCATAGTATAATC
3450458	0.00173195	0.00017259	2.67526	1.41968	up	SH2D5	400745	PREDICTED: Homo sapiens SH2 domain containing 5 (SH2D5), mRNA,	chr1	20918973	20919022	GAAGGGACCAGTCTCCACCAAGCACTTTAACATCCCTCCAGCCAGCATAG
7330044	0.00328738	0.000430978	2.66901	1.41631	up	DYNLT3	6990	Homo sapiens dynein, light chain, Tctex-type 3 (DYNLT3), mRNA,	chrX	37583497	37583546	ATTAGGGTACACAGCTGGCCACCAAATGCGAAGTCAATCTGCTACTTAAC
3610722	0.000336238	1.49314e-05	2.64782	1.4048	up	CLCC1	23155	Homo sapiens chloride channel CLIC-like 1 (CLCC1), transcript variant 2, mRNA,	chr1	109472670	109472719	CTTCTCTGGACATGCGCGTTTGAGGGTGGAGGGGTCCTGTAAGGTGCTTC
3360431	0.000910931	6.70363e-05	2.62159	1.39044	up	ZAK	51776	Homo sapiens sterile alpha motif and leucine zipper containing kinase AZK (ZAK), transcript variant 1, mRNA,	chr2	173790175	173790224	GACGTTTAAAGATGTGGGAGCAAAAGCTGACAGAGCAGTCCAACACCCCG
3780762	0.000391879	1.86735e-05	2.59178	1.37394	up	FAM44B	91272	Homo sapiens family with sequence similarity 44, member B (FAM44B), mRNA,	chr5	172967249	172967298	TAGGCATAAGGAAACTCGTTTGCAGGCTCTCTGTCCAGGGCTGCTTCCTG
1240553	0.00112711	9.11122e-05	2.56378	1.35827	up	SESN1	27244	Homo sapiens sestrin 1 (SESN1), mRNA,	chr6	109414902	109414951	CCTGACACTGGAGGGCAGCTGTCTTGTGCATTACTTGTGTTCCCAGCACC
2810615	0.000439253	2.24727e-05	2.5542	1.35287	up	GRB10	2887	Homo sapiens growth factor receptor-bound protein 10 (GRB10), transcript variant 4, mRNA,	chr7	50625509	50625558	TACCTGACAGTATGACCGATCTCTGCGCCTTTCTGGGGGCGGGCAAGCTG
1070152	0.00040868	1.99522e-05	2.53312	1.34092	up	IL17RB	55540	Homo sapiens interleukin 17 receptor B (IL17RB), mRNA,	chr3	53874362	53874411	GCTGCTCCTTGTAGCCCACCCATGAGAAGCAAGAGACCTTAAAGGCTTCC
4670059	6.55412e-05	8.34224e-07	2.52965	1.33894	up	ZAK	51776	Homo sapiens sterile alpha motif and leucine zipper containing kinase AZK (ZAK), transcript variant 2, mRNA,	chr2	173799586	173799635	CTCCACCTTTGTTTGCACTCTGTTGCCTGTGAGGAGCTTTCTGGCATGTG
6380370	0.000469543	2.47715e-05	2.52923	1.3387	up	CCND3	896	Homo sapiens cyclin D3 (CCND3), mRNA,	chr6	42010712	42010761	GCCCTGTTGACACAGGTCTTTCCTAAGGCTGCAAGGTTTAGGCTGGTGGC
4390703	0.000231512	8.05344e-06	2.52484	1.33619	up	PTPN1	5770	Homo sapiens protein tyrosine phosphatase, non-receptor type 1 (PTPN1), mRNA,	chr20	48634193	48634242	ACCCTGCAGAGCTATGGTGAGGTGTGGATAAGGCTTAGGTGCCAGGCTGT
5390661	0.00134491	0.000119208	2.49349	1.31816	up	VLDLR	7436	Homo sapiens very low density lipoprotein receptor (VLDLR), transcript variant 2, mRNA,	chr9	2638670	2638719	GAGGTCTAAACAAATAATACCCCCGTCGGAATGGTAACCGAGCCAGCAGC
6660630	0.000448161	2.30397e-05	2.49009	1.3162	up	TP53INP1	94241	Homo sapiens tumor protein p53 inducible nuclear protein 1 (TP53INP1), mRNA,	chr8	96007891	96007940	AGTACCTGGGGAGGTTAGATGTGTGTTTCAGGCTTGGAGTGTATGAGTGG
2370204	0.000791548	5.46969e-05	2.48684	1.31431	up	CCNC	892	Homo sapiens cyclin C (CCNC), transcript variant 2, mRNA,	chr6	100104819	100104868	TGCTCCAGTATGTGCAGGACATGGGCCAAGAAGACATGTTGCTTCCCCTT
4780086	0.00184914	0.00019006	2.48384	1.31257	up	CRK	1398	Homo sapiens v-crk sarcoma virus CT10 oncogene homolog (avian) (CRK), transcript variant II, mRNA,	chr17	1325938	1325987	CCTAACTAATGGGATCCAGCAGGGCCATTTCTCCAGAGGGCCAGTATCCT
5080601	0.00156738	0.000149931	2.48341	1.31232	up	COBLL1	22837	Homo sapiens COBL-like 1 (COBLL1), mRNA,	chr2	165541412	165541461	TGTCGGCTTACAGCTCTTCCGGAGTCTAGAGCCTGTTGGTGTTCTGTCCC
4860066	0.000692706	4.49934e-05	2.4453	1.29001	up	LOC647346	647346	PREDICTED: Homo sapiens similar to Alcohol dehydrogenase class 3 chi chain (Alcohol dehydrogenase class III chi chain) (S-(hydroxymethyl)glutathione dehydrogenase) (Glutathione-dependent formaldehyde dehydrogenase) (FDH), transcript variant 1 (LOC647346), mRNA,				ATTCATCTGTTCTCCAGTTGAAGGCATGAAGTTGTTGCCAGTTTCTGTAT
7400372	0.0029052	0.00035979	2.4368	1.28499	up	WSB1	26118	Homo sapiens WD repeat and SOCS box-containing 1 (WSB1), transcript variant 3, mRNA,	chr17	22659729	22659778	TGCTTGCAGTATCTGTTTCTCTTCCTAGGCTCAAGTTGGTGACCCAAGCC
5890619	0.00208365	0.000223399	2.43089	1.28148	up	ASPH	444	Homo sapiens aspartate beta-hydroxylase (ASPH), transcript variant 1, mRNA,	chr8	62756092	62756141	TAGGAATCTATGATGCTGATGGTGATGGAGATTTTGATGTGGATGATGCC
5720161	0.000613646	3.77477e-05	2.41701	1.27322	up	ADH5	128	Homo sapiens alcohol dehydrogenase 5 (class III), chi polypeptide (ADH5), mRNA,	chr4	100212201	100212250	GGGAAAGGAAGCAGGGCAGTGGTGGGTGTCTGAAACCTCAGAAACATAAC
2230519	0.000569996	3.36204e-05	2.40458	1.26578	up	PNMAL1	55228	Homo sapiens PNMA-like 1 (PNMAL1), transcript variant 1, mRNA,	chr19	51661949	51661998	CATAGAGTATTAGCCCTTGCAAGTTTTCAGGGCGTCTTTTCCGACTTCAG
150681	0.000202624	6.55179e-06	2.39666	1.26103	up	ZNHIT6	54680	Homo sapiens zinc finger, HIT type 6 (ZNHIT6), mRNA,	chr1	86118751	86118800	CTGTGCCTTTCATCACATTCCTAGCCCACTCTCATCATTACTGCAGAAGG
2640441	0.00455842	0.000683773	2.39392	1.25937	up	PRAGMIN	157285	Homo sapiens homolog of rat pragma of Rnd2 (PRAGMIN), mRNA,	chr8	8223332	8223381	ACGTCCTGAGGACAGTTCTGTGAACTGAATGCAGCCTGGACACTGGCCTC
3460707	0.00186792	0.000192587	2.38935	1.25662	up	STMN1	3925	Homo sapiens stathmin 1 (STMN1), transcript variant 1, mRNA,	chr1	26226891	26226940	CCGCACGTTCTCTGCCCCGTTTCTTGCCCCAGTGTGGTTTGCATTGTCTC
6960379	0.00182768	0.00018617	2.38312	1.25285	up	SFRP1	6422	Homo sapiens secreted frizzled-related protein 1 (SFRP1), mRNA,	chr8	41239120	41239169	CACTTGGCTCTTGGTACCTGTGGGTTAGCATCAAGTTCTCCCCAGGGTAG
2900731	0.00154215	0.000146478	2.37658	1.24888	up	PCSK7	9159	Homo sapiens proprotein convertase subtilisin/kexin type 7 (PCSK7), mRNA,	chr11	117075986	117076035	CACTGCCACTCCAGTCCTGCCACCACCCTGTCTTCCTCTGCAAGTGCTCA
7050433	0.0074772	0.00136793	2.36407	1.24127	up	RDH10	157506	Homo sapiens retinol dehydrogenase 10 (all-trans) (RDH10), mRNA,	chr8	74398847	74398896	GTGCCCTTTCCTCAGGAAGTTGCTGTGTTTCATTTCTTTGGATGGACTCT
7380100	0.00359834	0.000487731	2.35937	1.2384	up	MCL1	4170	Homo sapiens myeloid cell leukemia sequence 1 (BCL2-related) (MCL1), transcript variant 1, mRNA,	chr1	150550866	150550915	CTCGAGTGATGATCCATGTTTTCAGCGACGGCGTAACAAACTGGGGCAGG
2230615	0.00519457	0.000823448	2.35936	1.2384	up	WSB1	26118	Homo sapiens WD repeat and SOCS box-containing 1 (WSB1), transcript variant 2, mRNA,	chr17	22663930	22663979	CTTACGAAAGTTGAATTGGGTGAGGCGGGCAAATCACCTGAGGTCAGCAG
7330026	0.00315048	0.000405022	2.34978	1.23253	up	FRAT2	23401	Homo sapiens frequently rearranged in advanced T-cell lymphomas 2 (FRAT2), mRNA,	chr10	99092443	99092492	TGTGACTCTCCCAGAGAAGAAGCCGCTGGCTGTATGAAACTTGACGGCGC
1770397	0.000453167	2.34095e-05	2.33767	1.22507	up	CCNC	892	Homo sapiens cyclin C (CCNC), transcript variant 1, mRNA,	chr6	100123180	100123229	GAGCTGATTTGATCGAGGAGCGCGGTTACCGGACGGGCTGGGTCTATGGT
2370450	0.000649659	4.11179e-05	2.3284	1.21934	up	ASPH	444	Homo sapiens aspartate beta-hydroxylase (ASPH), transcript variant 2, mRNA,	chr8	62759248	62759297	CAAAGCATGGAGGACACAAGAATGGGAGGAAAGGCGGACTCTCAGGAACT
5220491	0.00664535	0.00115952	2.32243	1.21563	up	VGLL4	9686	Homo sapiens vestigial like 4 (Drosophila) (VGLL4), mRNA,	chr3	11572662	11572711	GCGCTGCCTGCAGTGCGCTCTGACCTTCTCTTCATGTGTGTAAATCTGTA
620180	0.000317763	1.37335e-05	2.32066	1.21454	up	STAG2	10735	Homo sapiens stromal antigen 2 (STAG2), transcript variant 2, mRNA,	chrX	123063382	123063431	GTGGCTACTTGCCATTTTGACATCAACTCATTTTGCGAGGCTTAGGCAGC
2190603	0.000573566	3.39514e-05	2.31837	1.21311	up	PLS3	5358	Homo sapiens plastin 3 (T isoform) (PLS3), mRNA,	chrX	114790457	114790506	GCCCTCTTAGAATGTCCCTCTCTTGGGACTTGCTTAGATGATGGGATATG
6250154	1.40057e-05	1.6944e-09	2.3129	1.2097	up	LZTFL1	54585	Homo sapiens leucine zipper transcription factor-like 1 (LZTFL1), mRNA,	chr3	45865671	45865720	GGTGGTTTGAGCCTTGATTAGACTTTTGATGTGCTAAGCCAGACAGGCAG
4780133	0.000279438	1.1235e-05	2.31189	1.20907	up	GBA	2629	Homo sapiens glucosidase, beta; acid (includes glucosylceramidase) (GBA), transcript variant 3, mRNA,	chr1	155204870	155205013	GGCTCTGCTGTTGTGGTCGTGCTAAACCGCTCCTCTAAGGATGTGCCTCT
6290112	0.000344878	1.54434e-05	2.29828	1.20055	up	SRPR	6734	Homo sapiens signal recognition particle receptor (docking protein) (SRPR), mRNA,	chr11	126133104	126133153	TCTTGGCCTCCCAACTCTTCCCACTCCCAGAATCCAGAAGTAAGCTCTGC
3400458	8.10822e-05	1.26489e-06	2.28523	1.19234	up	MSRB3	253827	Homo sapiens methionine sulfoxide reductase B3 (MSRB3), transcript variant 1, mRNA,	chr12	64145826	64145875	CTCAGCCATCAGCGTCCAGACCATCCTAGAAGTCTTTCCCAATCTCACAG
5340768	0.00035661	1.62975e-05	2.28365	1.19134	up	NGRN	51335	Homo sapiens neugrin, neurite outgrowth associated (NGRN), transcript variant 1, mRNA,	chr15	88610472	88610521	ACATCCATTCTGCTTCCACGCATGGCTTCTGCCATTGGTTCTCTTCCCCC
780259	0.000794709	5.51126e-05	2.28113	1.18975	up	ZNHIT6	54680	Homo sapiens zinc finger, HIT type 6 (ZNHIT6), mRNA,	chr1	86119008	86119057	GTACAACGCACCGTCTAGCCACAGGAGAACTAATCTTCTATCAGTTGCCC
2100722	4.92291e-05	4.90892e-07	2.27919	1.18852	up	VAMP4	8674	Homo sapiens vesicle-associated membrane protein 4 (VAMP4), mRNA,	chr1	171673273	171673322	TTTAATGGCATAAGGACTTGCATTATTGCATTAGGGAGCGGGTCATGCTG
3440133	0.00127633	0.00011055	2.27199	1.18396	up	RNF150	57484	Homo sapiens ring finger protein 150 (RNF150), mRNA,	chr4	142007352	142007401	GGAGGTCCTGCTGCAAACCCCCTGAGCCTTTGCCATTCACTACTTACCAA
2940577	0.0186966	0.00479463	2.25171	1.17102	up	HSPA2	3306	Homo sapiens heat shock 70kDa protein 2 (HSPA2), mRNA,	chr14	64079042	64079091	CGACAAGTGTCAGGAGGTGATCAACTGGCTCGACCGAAACCAGATGGCAG
5550431	0.00265506	0.000317412	2.24658	1.16773	up	MMD	23531	Homo sapiens monocyte to macrophage differentiation-associated (MMD), mRNA,	chr17	53470363	53470412	GGCTTGCCTTTAGATCGGGTGCTGATATTGCCTGTTTCCTAGTAATGGGC
2450114	0.000169686	4.89716e-06	2.24605	1.16739	up			Homo sapiens cDNA FLJ32401 fis, clone SKMUS2000339	chr1	212589151	212589200	ATTCCAGGTTGGGACTTGGGATCCTGAGAGCACATTCGCCCCCTGTGGTG
2060477	0.0002424	8.67157e-06	2.23091	1.15764	up	AGPAT9	84803	Homo sapiens 1-acylglycerol-3-phosphate O-acyltransferase 9 (AGPAT9), mRNA,	chr4	84526603	84526652	TCCTTGTTTGAATGCTGTAGATCTGTACCTAGTACCCCTCCCATCTACTG
1990253	0.000425482	2.12251e-05	2.22538	1.15405	up	TDG	6996	Homo sapiens thymine-DNA glycosylase (TDG), mRNA,	chr12	102906409	102906458	TTTTGTGCGGGTGCTTTGAAGTGCCTTGCATCAGGGATTAGGAGCAATTA
6480315	0.000435494	2.20314e-05	2.21407	1.1467	up	GPBP1	65056	Homo sapiens GC-rich promoter binding protein 1 (GPBP1), mRNA,	chr5	56582634	56582683	GGCAATGCCTCAGTGATTTCCCAGCAGATCATTCGGTCTTCAACCTTCCC
4230451	0.000424888	2.11804e-05	2.21326	1.14617	up	ARMCX1	51309	Homo sapiens armadillo repeat containing, X-linked 1 (ARMCX1), mRNA,	chrX	100695454	100695503	CATGGTCTGTCGCTTGGACTCAGCTGTGCAGATGGCTGGGCTAAGACTGT
3870520	2.12871e-05	7.25701e-08	2.20603	1.14145	up	VAMP4	8674	Homo sapiens vesicle-associated membrane protein 4 (VAMP4), mRNA,	chr1	171675558	171678853	GCAACAGATCCAAACAACTTCGAAGGCAAATGTGGTGGCGTGGATGCAAA
4060068	0.000438964	2.24268e-05	2.20193	1.13877	up	PDIA4	9601	Homo sapiens protein disulfide isomerase family A, member 4 (PDIA4), mRNA,	chr7	148331345	148331394	TCTGATTGCTTCCTGTTGAGCACAAAGTGAGAGCTGCCACTGAGCAGCCC
130142	0.0274819	0.00798977	2.20003	1.13752	up	LOC653994	653994	PREDICTED: Homo sapiens similar to Eukaryotic translation initiation factor 4H (eIF-4H) (Williams-Beuren syndrome chromosome region 1 protein homolog), transcript variant 2 (LOC653994), mRNA,				CGGAGACGGCAAATGGCGGACTTCGACACCTACGACGATCGGGCCTACAG
7560180	0.00146252	0.000135337	2.19118	1.13171	up	SUSD1	64420	Homo sapiens sushi domain containing 1 (SUSD1), mRNA,	chr9	114803423	114803472	TCTGTGAATCTTGGCTGGGACTTCCTCTGAGTGATGCCTGAGGGTCAGCT
5820343	0.000288745	1.17418e-05	2.19056	1.1313	up	ERCC5	2073	Homo sapiens excision repair cross-complementing rodent repair deficiency, complementation group 5 (ERCC5), mRNA,	chr13	102326079	102326128	CGCAGAACTCAGTGAAGGAAGCTCCCGTGAAGAATGGAGGTGCGACCACC
6520066	0.00122999	0.000103402	2.18818	1.12973	up	VAMP7	6845	Homo sapiens vesicle-associated membrane protein 7 (VAMP7), mRNA,	chrXY	57685399	57685448	GGCTCATGGTACCTGTTCTTCTATCCAAACCTTTCAATTCATGCTACCTG
5870605	0.000505868	2.78178e-05	2.17597	1.12166	up			full-length cDNA clone CS0DF005YI08 of Fetal brain of Homo sapiens (human)	chr1	15867806	15867855	CTTGCCAGTGGCCCTGTCACTCCCATGATGCTTTGGTTTTGAGAGTTGGG
3390017	0.000617944	3.82209e-05	2.17094	1.11832	up	CNDP2	55748	Homo sapiens CNDP dipeptidase 2 (metallopeptidase M20 family) (CNDP2), mRNA,	chr18	70339151	70339200	GAGGAAAGAAATTAGGGCCTCCTCTGATCTCTCGCTATCTGCGGGTCCTG
6770673	0.000894326	6.50818e-05	2.16544	1.11466	up	SOCS2	8835	Homo sapiens suppressor of cytokine signaling 2 (SOCS2), mRNA,	chr12	92493848	92493897	GTAGGTATAGGCATTCTACCCTTTGAAATAGCTGTGTCCCAACCTGTTGC
4640386	0.000199523	6.38079e-06	2.16342	1.11331	up	WNT2B	7482	Homo sapiens wingless-type MMTV integration site family, member 2B (WNT2B), transcript variant WNT-2B2, mRNA,	chr1	112865312	112865361	GGACAGCACTGCCTCTTTTGCTTACTTGCTGCCTGTTCAAACTGAGGTGG
780021	0.00112608	9.09696e-05	2.16177	1.11221	up	OPN3	23596	Homo sapiens opsin 3 (OPN3), mRNA,	chr1	241761157	241761206	CACCTTCCTGGTCTGTTGGATGCCTTATATCGTGATCTGCTTCTTGGTGG
4280482	0.000551011	3.16873e-05	2.15692	1.10897	up	DRAM1	55332	Homo sapiens DNA-damage regulated autophagy modulator 1 (DRAM1), mRNA,	chr12	100841204	100841253	CTTCTGCCTCACTTCGAGCAGACTTTTGTTCTCGGCGCTCCTCACGATGG
840369	0.0218433	0.00590122	2.15164	1.10543	up	LBH	81606	Homo sapiens limb bud and heart development homolog (mouse) (LBH), mRNA,	chr2	30308056	30308105	ACGCAGGGACCGTTTTTAAATCACAGGGGCGTGTGTCAGCCTGCCCTAGG
5080482	0.00144438	0.000132634	2.14975	1.10417	up	TNPO1	3842	Homo sapiens transportin 1 (TNPO1), transcript variant 2, mRNA,	chr5	72192890	72192939	CAGTCTTGGAGACTATAAGGGAGCCTCTGCACCCAGGGAAAATGTTACCC
7100215	0.000635183	3.97482e-05	2.14481	1.10085	up	TSC22D2	9819	Homo sapiens TSC22 domain family, member 2 (TSC22D2), mRNA,	chr3	150176683	150176732	ACCTGGTGCGCATGAGTGGGGTCTTTAAGAGTTTTGGTGGCTCTCCCATG
6060201	0.0012448	0.00010548	2.14412	1.10038	up	DDX18	8886	Homo sapiens DEAD (Asp-Glu-Ala-Asp) box polypeptide 18 (DDX18), mRNA,	chr2	118306098	118306147	GGACTTCCAACCTTGACTGCTGAGCTCCTGGCTTAGCTTCTTGGGTTCCT
7040014	0.000389019	1.84406e-05	2.134	1.09356	up	CRK	1398	Homo sapiens v-crk sarcoma virus CT10 oncogene homolog (avian) (CRK), transcript variant II, mRNA,	chr17	1339923	1339972	GCCAGGGTTATCCAGAAGCGAGTCCCCAATGCCTACGACAAGACAGCCTT
360128	0.00206827	0.000220869	2.12689	1.08874	up	KIT	3815	Homo sapiens v-kit Hardy-Zuckerman 4 feline sarcoma viral oncogene homolog (KIT), transcript variant 2, mRNA,	chr4	55301107	55301156	GCCGTTATCTGGAAGTAACCATTTGCACTGGAGTTCTATGCTCTCGCACC
6940164	0.0425543	0.0142848	2.12524	1.08762	up	LBH	81606	PREDICTED: Homo sapiens hypothetical protein DKFZp566J091 (LBH), mRNA,				AGCCGCAATTGTTCTGAAAATGTCAAACGAGGCTTCTGTTTTGCACCTGC
6290519	0.00334041	0.00043949	2.11162	1.07835	up	STOM	2040	Homo sapiens stomatin (STOM), transcript variant 1, mRNA,	chr9	124110373	124110422	CTCTGGATGATGCCACTGATGCCTGGGGAATAAAGGTGGAGCGTGTGGAA
6580400	0.000710075	4.64949e-05	2.1101	1.07731	up	FLJ10781	55228	Homo sapiens hypothetical protein FLJ10781 (FLJ10781), mRNA,	chr19	51661742	51661791	TGCATCGACGTTCTCCTGGGGTGTGTGCCAAGCGAAACCCAGGGGTGAAT
4230653	0.00144119	0.000132012	2.09206	1.06493	up	CCNC	892	Homo sapiens cyclin C (CCNC), transcript variant 1, mRNA,	chr6	100097231	100097280	CTGAACCAGGAACACAATCAGGTTTCAGGCCAGTTTGATACTGGCTGTCC
1570646	0.00291494	0.000361329	2.09029	1.06371	up	TFAP2A	7020	Homo sapiens transcription factor AP-2 alpha (activating enhancer binding protein 2 alpha) (TFAP2A), transcript variant 3, mRNA,	chr6	10506312	10506361	GAACAGGCCGTGAAGCCAGCAGAGAAAAGTTCTGCCAAGTTTGTGAACCC
3370242	0.000899797	6.57501e-05	2.08539	1.06032	up	DKFZp761P0423	157285	PREDICTED: Homo sapiens hypothetical protein DKFZp761P0423 (DKFZp761P0423), mRNA,	chr8	8213003	8213052	TCCCTGCCTAACCCTTTCCTGTCTCGCCTTGGAAGCACCCATGTCTCCCT
1770224	0.00392312	0.000552061	2.08526	1.06023	up	PRICKLE1	144165	Homo sapiens prickle homolog 1 (Drosophila) (PRICKLE1), mRNA,	chr12	41139375	41139424	CTGTGCATCTTATTGTGAGGCCAGCTTGTCCCCTCGAACCCTCTTTGGCC
360280	0.00178732	0.000180279	2.08514	1.06014	up	PNRC2	55629	Homo sapiens proline-rich nuclear receptor coactivator 2 (PNRC2), mRNA,	chr1	24162164	24162213	GTTTGGTCAAGGGGTAGGTGCAACCCAATGGACCACTTATGCAAAAGATG
4070241	8.9071e-05	1.55373e-06	2.08084	1.05717	up	GYG2	8908	Homo sapiens glycogenin 2 (GYG2), transcript variant 2, mRNA,	chrX	2799166	2799215	CTTTTTCCGTGTGGGTGGTTAATAATCGTCAGTCTCGGAGGGCGAGGCTC
5810564	0.000392244	1.87595e-05	2.07132	1.05055	up	CMBL	134147	Homo sapiens carboxymethylenebutenolidase homolog (Pseudomonas) (CMBL), mRNA,	chr5	10332591	10332640	GGACCAGCTGACAGGTCAAGTGTGGCCTTTTCTGGTCTTTGAACACATCA
6550048	0.00015341	4.05756e-06	2.06663	1.04728	up	DHCR7	1717	Homo sapiens 7-dehydrocholesterol reductase (DHCR7), mRNA,	chr11	70823473	70823522	AAAGGGGCTTTCATGTCGTTTCCTTCCTGCTCCTGCTGCACAGCTGCCAG
1070292	0.00117059	9.68263e-05	2.06503	1.04616	up	GPSM2	29899	Homo sapiens G-protein signalling modulator 2 (AGS3-like, C, elegans) (GPSM2), mRNA,	chr1	109268251	109268300	GCCAGGGCTTCGTCTAACACAAAACAGCCAGTCGGTACTTAGCCACCTGA
6580364	0.00199303	0.000209937	2.0645	1.04579	up	NEK7	140609	Homo sapiens NIMA (never in mitosis gene a)-related kinase 7 (NEK7), mRNA,	chr1	196555203	196555252	GTGCATCAACCCAGATCCAGAGAAGCGACCAGACGTCACCTATGTTTATG
5360678	0.00283854	0.000348958	2.06179	1.0439	up	DHCR7	1717	Homo sapiens 7-dehydrocholesterol reductase (DHCR7), transcript variant 1, mRNA,	chr11	71145731	71145780	CACCGGCTGTGGCCTTTCAGGTGTAGGCAGGTGGGCTCTGCTTCCCGATT
4610070	0.00397956	0.000563671	2.05506	1.03918	up	ITSN1	6453	Homo sapiens intersectin 1 (SH3 domain protein) (ITSN1), transcript variant 2, mRNA,	chr21	34132456	34132505	CTGTCGGGAGGCTGTGCTGGTGGTCGTGTAGAGGTCCTTCTCCTTTCACA
2810673	0.00213592	0.000230365	2.0519	1.03696	up	HOXA9	3205	Homo sapiens homeobox A9 (HOXA9), mRNA,	chr7	27202174	27202223	CCGCCATTGGGCTACTGTAGATTTGTATCCTTGATGAATCTGGGGTTTCC
4850307	0.000599575	3.65633e-05	2.04977	1.03546	up	LOC100131261	100131261	PREDICTED: Homo sapiens similar to hCG1728885 (LOC100131261), mRNA,				CCTCTTTTGATGCCTAAGCAGGTAAGCAGATGCCTAAGCTGTATTTCTCC
1190735	0.002162	0.000235325	2.04824	1.03438	up	APP	351	Homo sapiens amyloid beta (A4) precursor protein (APP), transcript variant 1, mRNA,	chr21	26291551	26291600	GTCCCAAAGTTTACTCAAGACTACCCAGGAACCTCTTGCCCGAGATCCTG
3930452	0.00075223	5.08365e-05	2.04604	1.03283	up	CDC2L6	23097	Homo sapiens cell division cycle 2-like 6 (CDK8-like) (CDC2L6), mRNA,	chr6	111038242	111038291	CAGGACGAGCTACTGCTTTGGAGCGAGGGTTTCCTGCTTTTGAGTTGACC
7200243	0.00347531	0.000463909	2.04527	1.03229	up	SERPINB7	8710	Homo sapiens serpin peptidase inhibitor, clade B (ovalbumin), member 7 (SERPINB7), transcript variant 1, mRNA,	chr18	59623082	59623131	GTCTTTCTTCCCACGCTCATTTCTATCATTCTCCCCCATGACCCGTCTGG
5420538	7.64722e-05	1.11163e-06	2.0374	1.02673	up	TP53INP1	94241	Homo sapiens tumor protein p53 inducible nuclear protein 1 (TP53INP1), mRNA,	chr8	96007715	96007764	GGCATGAGTTAGGGAGACTGAAGAGTATTGTAGACTGTACATGTGCCTTC
2750088	0.00433445	0.000636682	2.03707	1.0265	up	LOC730996	730996	PREDICTED: Homo sapiens similar to chromosome 1 open reading frame 80 (LOC730996), mRNA,				GCAACATGCTTGGAATTGCGAAGTGCAGCTTTACAGTCCACACAGTCTCA
4150037	0.00073631	4.90786e-05	2.0359	1.02567	up	G3BP2	9908	Homo sapiens GTPase activating protein (SH3 domain) binding protein 2 (G3BP2), transcript variant 3, mRNA,	chr4	76787451	76787500	CCAATTCAGGATATTGCCCTGCCATCCATGAAAACTGTTCTGGCACCAAA
6550196	0.000402152	1.94197e-05	2.03551	1.02539	up	CRK	1398	Homo sapiens v-crk sarcoma virus CT10 oncogene homolog (avian) (CRK), transcript variant II, mRNA,	chr17	1326169	1326218	GGGATTCTTTTAGCCCTTGACATTCTTGTCCCCCAAACCTGTAAGTAGGT
2350703	0.000791155	5.46255e-05	2.03215	1.02301	up	STX3	6809	Homo sapiens syntaxin 3 (STX3), mRNA,	chr11	59326495	59326544	GGCCGGTCACAATCCAGCACTCAGACAGAGCCAAGGCAATATCCTCTTGC
270053	4.70356e-05	4.47188e-07	2.02846	1.02038	up	GABPA	2551	Homo sapiens GA binding protein transcription factor, alpha subunit 60kDa (GABPA), mRNA,	chr21	26065252	26065301	GGTTTTGCACCATCCTCTTACGGCCTAGAGAGTTGACAAGTTGCTTGTAG
6860228	0.00197576	0.000207442	2.02782	1.01993	up	C5orf41	153222	Homo sapiens chromosome 5 open reading frame 41 (C5orf41), mRNA,	chr5	172496055	172496104	GACATAGGCAAGCTGTGCAGCTTTACATTTTAACCAGGGGACTCTGTGGC
580048	0.000352435	1.60442e-05	2.02365	1.01696	up	GBA	2629	Homo sapiens glucosidase, beta; acid (includes glucosylceramidase) (GBA), transcript variant 3, mRNA,	chr1	155205079	155205497	CATGTTCTACCACCTTGGCCACTTCAGCAAGTTCATTCCTGAGGGCTCCC
6590220	0.00648618	0.001121	2.02082	1.01494	up	MEGF6	1953	Homo sapiens multiple EGF-like-domains 6 (MEGF6), mRNA,	chr1	3409272	3409321	CCCGCTCAGTGAAGACACAGTGTTCAGCTACGGAAGCCATAAGGCAGGCC
1470475	0.000183453	5.71075e-06	2.01841	1.01322	up	SECISBP2	79048	Homo sapiens SECIS binding protein 2 (SECISBP2), mRNA,	chr9	91164000	91164049	AGCCACTTGGCAGAAGGGTGCAGGGCTGCTGGTGTCAGAGCAAGAGGGCT
5290592	0.0048391	0.000742232	2.01808	1.01298	up	NRBF2	29982	Homo sapiens nuclear receptor binding factor 2 (NRBF2), mRNA,	chr10	64584374	64584423	TGGTGGCCGGAGGGGCTGCCTTATATTTGAAACATGCTTTCTATCATGCA
2710735	0.0192275	0.00497509	2.01728	1.01241	up	RASD1	51655	Homo sapiens RAS, dexamethasone-induced 1 (RASD1), mRNA,	chr17	17398006	17398055	GTCAGGACCCACGGGGCATTATCTTGTCTGTGATTCCGGGTTGCTGTGAC
1940647	0.00239943	0.000275119	2.01231	1.00886	up	HBP1	26959	Homo sapiens HMG-box transcription factor 1 (HBP1), mRNA,	chr7	106629731	106629780	AGGTGGCAGCAGCCATCCGTTATTATTTCCAATGGAGACCTAGCCCAGGC
6290603	0.000252561	9.29474e-06	2.01215	1.00874	up	EIF3B	8662	Homo sapiens eukaryotic translation initiation factor 3, subunit B (EIF3B), transcript variant 1, mRNA,	chr7	2386533	2386582	GCGCCTGGATTCTGCCATTGCGACACATTTTTGTGCCTTTCAGCCCCTGG
4150300	0.00345402	0.000460454	2.00821	1.00591	up	LOC652815	652815	PREDICTED: Homo sapiens similar to FK506-binding protein 9 precursor (Peptidyl-prolyl cis-trans isomerase) (PPIase) (Rotamase) (LOC652815), mRNA,				ACTCCATCAGCATCACCTCCCACTACAAACCCCCCGACTGCTCAGTGCTG
3190021	0.00164835	0.000160832	2.00468	1.00337	up	NTN4	59277	Homo sapiens netrin 4 (NTN4), mRNA,	chr12	96052096	96052145	GCGTGAAGTCTCAGCTTTGAGCTGGAGGCTAGATTCCAAGATGACAGCCA
1340360	0.000136402	3.26198e-06	2.00179	1.00129	up	RCC2	55920	Homo sapiens regulator of chromosome condensation 2 (RCC2), mRNA,	chr1	17605960	17606009	GTTGGGAATGTGCTTGGCGCTGACCCTGCGGGCATCTGACTGGTCTTCCA
1660019	0.00474036	0.000721516	2.00143	1.00103	up	SNCAIP	9627	Homo sapiens synuclein, alpha interacting protein (SNCAIP), mRNA,	chr5	121786565	121786614	CATAATGTGGGCAGATTTGGCTCAGCTCCTTCATGAGATCAGGTCAGTGG

## Sheet: moR103 vs neg1, 592 genes down
ProbeID	p (Benjamini Hochberg FDR corrected)	p	FC ([moR103] vs [neg1])	Log FC ([moR103] vs [neg1])	Regulation ([moR103] vs [neg1])	Symbol	Entrez_Gene_ID	Definition	Chromosome	Chromosome Start Index(Avadis)	Chromosome End Index(Avadis)	Probe_Sequence
1070025	2.12871e-05	7.35948e-08	-7.84552	-2.97187	down	ATPIF1	93974	Homo sapiens ATPase inhibitory factor 1 (ATPIF1), nuclear gene encoding mitochondrial protein, transcript variant 3, mRNA,	chr1	28435495	28435544	GAAGCCGGTGGGGCCTTCGGAAAGAGAGAGCAGGCTGAAGAGGAACGATA
2140753	2.55947e-05	1.17062e-07	-6.42406	-2.68348	down	RPL14	9045	Homo sapiens ribosomal protein L14 (RPL14), transcript variant 1, mRNA,	chr3	40478551	40478600	GCTGCTAAAGTTCCAGCAAAAAAGATCACCGCCGCGAGTAAAAAGGCTCC
1240482	1.77464e-05	4.29726e-08	-6.24993	-2.64384	down	LAGE3	8270	Homo sapiens L antigen family, member 3 (LAGE3), mRNA,	chrX	153706351	153706624	TCGTCCGCTGGAAAGCTGAAGACTGTCGCCTGCTCCGAATTTCCGTCATC
6270768	3.84295e-05	2.81834e-07	-5.74081	-2.52125	down	PLAC9	219348	Homo sapiens placenta-specific 9 (PLAC9), mRNA,	chr10	81891873	81892264	CAGACACATGGCTGTGCAACGCCGTCTAGATGTCATGGAGGAGATGGTAG
1030333	0.00178612	0.000179978	-5.40953	-2.4355	down	CCL2	6347	Homo sapiens chemokine (C-C motif) ligand 2 (CCL2), mRNA,	chr17	29607909	29607958	CAGGATTCCATGGACCACCTGGACAAGCAAACCCAAACTCCGAAGACTTG
6280446	0.00011839	2.58566e-06	-5.40063	-2.43313	down	LOC642989	642989	PREDICTED: Homo sapiens similar to 40S ribosomal protein S25 (LOC642989), mRNA,	chr1	209413609	209413658	ACTCTGTAAGGAAGTTCCCAAATACAAACTTATAACCCCAGCTGTGGTCT
1980500	1.77464e-05	3.20513e-08	-5.25788	-2.39448	down	ZMAT2	153527	Homo sapiens zinc finger, matrin type 2 (ZMAT2), mRNA,	chr5	140066112	140066161	GCATTGCTGCCCTGGGGCCTGATGTTCTTGGCTTCCTCAGAGCATGTAAC
6290168	0.000165432	4.59257e-06	-5.11563	-2.35491	down	C10orf116	10974	Homo sapiens chromosome 10 open reading frame 116 (C10orf116), mRNA,	chr10	88720419	88720468	GGCAGCCACCACCTCCTCGGTCTGCCCCCTCATTAAAATTCACGTTCCCA
7100066	1.40057e-05	2.48283e-09	-5.11265	-2.35407	down	POLR2G	5436	Homo sapiens polymerase (RNA) II (DNA directed) polypeptide G (POLR2G), mRNA,	chr11	62289709	62289758	GATTCAGCAGGACGATGAGATCCGCTTAAAGATTGTGGGGACCCGTGTGG
5890730	8.12011e-05	1.29026e-06	-5.08861	-2.34727	down	RPS26L	400156	PREDICTED: Homo sapiens 40S ribosomal protein S26-like (RPS26L), misc RNA,				TGTGCCCGATGCGTGCCCAAGGACAACGCCATTAAGAAATTCGTCATTCG
3930008	1.46335e-05	3.23713e-09	-5.01824	-2.32718	down	RPL14	9045	Homo sapiens ribosomal protein L14 (RPL14), transcript variant 1, mRNA,	chr3	40478782	40478831	TAAGCCTTTGGATTTAAAGCCTGTTGAGGCTGGAGTTAGGAGGCAGATTG
2680170	0.000202491	6.52594e-06	-4.9972	-2.32112	down	HSPE1	3336	Homo sapiens heat shock 10kDa protein 1 (chaperonin 10) (HSPE1), mRNA,	chr2	198073376	198074059	GCAGAGTACGAGTCTGAGGCGGAGGGAGTAATGGCAGGACAAGCGTTTAG
3310520	0.000168533	4.82803e-06	-4.76812	-2.25342	down	MOXD1	26002	Homo sapiens monooxygenase, DBH-like 1 (MOXD1), transcript variant 2, mRNA,	chr6	132659873	132659922	CCGTGTGAGCCAGTCCAGGAGGGTGTAAGTTCTGAATGGTTCCTTGCTGA
5130497	1.77464e-05	3.77815e-08	-4.38955	-2.13407	down	S100A13	6284	Homo sapiens S100 calcium binding protein A13 (S100A13), transcript variant 3, mRNA,	chr1	153598800	153598849	CAGCGTCAACGAGTTCAAAGAGCTGGTTACCCAGCAGTTGCCCCATCTGC
4540441	0.000432246	2.17631e-05	-4.35604	-2.12302	down	LOC641768	641768	PREDICTED: Homo sapiens similar to ribosomal protein S26, transcript variant 2 (LOC641768), mRNA,	chr7	121716296	121716345	TTACTGTGTGAGTTGTGCAATTCACAGCAAAGTAGTCAGGAATCGATCTC
110110	0.00163517	0.000159255	-4.31627	-2.10979	down	HSPE1	3336	Homo sapiens heat shock 10kDa protein 1 (chaperonin 10) (HSPE1), mRNA,	chr2	198074081	198074130	CCGAGTATTGGTTGAAAGGAGTGCTGCTGAAACTGTAACCAAAGGAGGCA
2340521	6.15005e-05	7.36897e-07	-4.27259	-2.09511	down	C17orf61	254863	Homo sapiens chromosome 17 open reading frame 61 (C17orf61), mRNA,	chr17	7306360	7306409	TGGGCTGGCTTGCCTTGGCTCTTTGAGCTCCCTTTTGCTTAATTACTGGG
1940274	7.2432e-05	9.85423e-07	-4.2131	-2.07488	down	IFI27L2	83982	Homo sapiens interferon, alpha-inducible protein 27-like 2 (IFI27L2), mRNA,	chr14	94594185	94594234	CCCAGCTGAACCCGAGGCTAAAGAAGATGAGGCAAGAGAAAATGTACCCC
450546	8.87545e-05	1.54053e-06	-4.16417	-2.05803	down	LOC100132863	100132863	PREDICTED: Homo sapiens misc_RNA (LOC100132863), miscRNA,				GTATGGTTAACACACTACCAAATGTGTCTTTAGATAGCCCTGTCCTGGTG
6520692	1.77464e-05	2.65388e-08	-4.11622	-2.04132	down	C6orf125	84300	Homo sapiens chromosome 6 open reading frame 125 (C6orf125), mRNA,	chr6	33776229	33777110	ACAAACACAAGTACCCTCGCCCCAGAGACACCAGCTTCAGTGGCCTGTCG
5870446	1.80084e-05	4.46938e-08	-4.0984	-2.03506	down	ATP5G1	516	Homo sapiens ATP synthase, H+ transporting, mitochondrial F0 complex, subunit C1 (subunit 9) (ATP5G1), nuclear gene encoding mitochondrial protein, transcript variant 2, mRNA,	chr17	44328133	44328182	CTCCATGGGGGGTCACCGGCCTGTTGCTACTGCAACTCCACACCATTCTT
1170047	0.000585876	3.52475e-05	-4.0957	-2.03411	down	CRIP1	1396	Homo sapiens cysteine-rich protein 1 (intestinal) (CRIP1), mRNA,	chr14	105025870	105026065	GCCGAGAGCCACACTTTCAAGTAAACCAGGTGGTGGAGACCCCATCCTTG
3710725	6.62354e-05	8.57745e-07	-4.07189	-2.0257	down	ATP5E	514	Homo sapiens ATP synthase, H+ transporting, mitochondrial F1 complex, epsilon subunit (ATP5E), nuclear gene encoding mitochondrial protein, mRNA,	chr20	57607346	57607395	TCTGATCTTCCTGCGGCTGAACCGCCCGGCTGAGCCGACATTGCCGGCGT
650301	3.90809e-05	2.90976e-07	-4.05958	-2.02133	down	SNRPF	6636	Homo sapiens small nuclear ribonucleoprotein polypeptide F (SNRPF), mRNA,	chr12	94776954	94779094	GTAGCCTGCAACATTCGGCCGTGGTTACGATGAGTTTACCCCTCAATCCC
5260360	0.000171907	5.03768e-06	-3.95119	-1.98229	down	LOC100131801	100131801	PREDICTED: Homo sapiens similar to hCG2036585 (LOC100131801), mRNA,	chr19	7601508	7601720	AGGCCGAGTGGTTTGAGGACGATGTCATACAGCGCAAGAGGGAGCTGTGG
2760519	2.71213e-05	1.32698e-07	-3.91132	-1.96766	down	CKLF	51192	Homo sapiens chemokine-like factor (CKLF), transcript variant 6, mRNA,	chr16	65144132	65144181	CAGCCGAAAATAAAACATCGCCCCTTCTGCTTCAGTGTGAAAGGCCACGT
6940561	9.80662e-05	1.88448e-06	-3.90718	-1.96613	down	IFI27L2	83982	Homo sapiens interferon, alpha-inducible protein 27-like 2 (IFI27L2), mRNA,	chr14	94594253	94594302	AACATCCTCCTGGCCTCTGTTGGGTCAGTGTTGGGGGCCTGCTTGGGGAA
460114	3.92821e-05	2.9627e-07	-3.89067	-1.96002	down	SNRPF	6636	Homo sapiens small nuclear ribonucleoprotein polypeptide F (SNRPF), mRNA,	chr12	94776956	94779096	GTAGCCTGCAACATTCGGCCGTGGTTTACATGAGTTTACCCCTCAATCCC
3390072	5.83489e-05	6.7441e-07	-3.88138	-1.95657	down	LOC100133477	100133477	PREDICTED: Homo sapiens similar to Nop10p (LOC100133477), mRNA,				CAAGAAACGTTTAAAGGTGCTCATGACCCAGCAACCGCGCCCTGTCCTCT
290370	9.47464e-05	1.78374e-06	-3.87143	-1.95287	down	LOC100130070	100130070	PREDICTED: Homo sapiens similar to metallopanstimulin (LOC100130070), mRNA,				CCAGAACAGGAGAAGAGGAAACACAAGAAGAAACGCCTGGTGCAGAGCCC
7210528	4.00152e-05	3.16376e-07	-3.86967	-1.95221	down	TMEM205	374882	Homo sapiens transmembrane protein 205 (TMEM205), mRNA,	chr19	11314494	11314543	CTGAGCAATGGGCTCTGTCTCGCTGGCCTTGCCCTGGAAATAAGGAGCCT
7320435	3.373e-05	2.12868e-07	-3.8624	-1.9495	down	DPM3	54344	Homo sapiens dolichyl-phosphate mannosyltransferase polypeptide 3 (DPM3), transcript variant 2, mRNA,	chr1	155112673	155112967	AGTGACCATGACGAAATTAGCGCAGTGGCTTTGGGGACTAGCGATCCTGG
1300608	5.52563e-05	6.14682e-07	-3.8553	-1.94684	down	SNHG9	735301	Homo sapiens small nucleolar RNA host gene 9 (non-protein coding) (SNHG9), non-coding RNA,	chr16	1955069	1955118	GGAATCCACCCGAAGAGTGGCTATAAACGTCCGCGCCTCCATTGCGCTCT
5390138	0.000273765	1.08085e-05	-3.83644	-1.93977	down	COX7A1	1346	Homo sapiens cytochrome c oxidase subunit VIIa polypeptide 1 (muscle) (COX7A1), mRNA,	chr19	41334414	41334463	ACCGCCCGGAACCGCTTTCAGAACCGAGTGCGCGAGAAACAGAAGCTCTT
4010180	0.000490684	2.64087e-05	-3.81694	-1.93242	down	LOC653156	653156	PREDICTED: Homo sapiens similar to hCG1782414 (LOC653156), mRNA,				TAAAAGAAAATCGCCTTTCGGCTGGAACCGCCATCTTCCAGTAATTCGCC
4070392	3.53245e-05	2.33662e-07	-3.78493	-1.92027	down	CYBA	1535	Homo sapiens cytochrome b-245, alpha polypeptide (CYBA), mRNA,	chr16	88712587	88713193	AATTACTATGTTCGGGCCGTCCTGCATCTCCTGCTCTCGGTGCCCGCCGG
7560215	0.000492869	2.66836e-05	-3.78221	-1.91923	down	LOC100129685	100129685	PREDICTED: Homo sapiens hypothetical protein LOC100129685 (LOC100129685), mRNA,				GAGAGGAAGGGGTTTCCTTTCGGCCGGAACCGCCATCTTCCAGTAATTCG
2060465	0.000100167	2.01189e-06	-3.77903	-1.91802	down	UBE2E1	7324	Homo sapiens ubiquitin-conjugating enzyme E2E 1 (UBC4/5 homolog, yeast) (UBE2E1), transcript variant 2, mRNA,	chr3	23907374	23907423	CTGTAAGGCGTGGAATAGGAGTTGCTCAGTGGATTGGTTCTATGTTGTGG
1430639	1.95035e-05	5.36495e-08	-3.77344	-1.91588	down	MRPS18C	51023	Homo sapiens mitochondrial ribosomal protein S18C (MRPS18C), nuclear gene encoding mitochondrial protein, mRNA,	chr4	84596340	84597120	CCGGGACTCACACGGTGCTTTGGAGAAGAGGTTGTTCACAACAGGTATCC
6270605	0.000175612	5.26743e-06	-3.75462	-1.90867	down	LOC649946	649946	Homo sapiens ribosomal protein L23a pseudogene (LOC649946), non-coding RNA,	chr11	118378958	118379007	CGGCCTGATGGAGAGAAGGAACATGTTCGACTGGCTCCTGATTACAATGC
5560131	0.000166573	4.66558e-06	-3.7398	-1.90296	down	ATOX1	475	Homo sapiens ATX1 antioxidant protein 1 homolog (yeast) (ATOX1), mRNA,	chr5	151122469	151122518	ATGCTGATCCTCCCGCTGGCTTCCAGACAGACCTGGGACTTGGCAGTCAT
2260576	2.36525e-05	9.92149e-08	-3.71744	-1.89431	down	COX7B	1349	Homo sapiens cytochrome c oxidase subunit VIIb (COX7B), nuclear gene encoding mitochondrial protein, mRNA,	chrX	77044807	77044856	CAGCAAACAATGGCAAGGCAGAGCCACCAGAAACGTACACCTGATTTTCA
6450546	0.00026508	1.01334e-05	-3.70661	-1.8901	down	VKORC1	79001	Homo sapiens vitamin K epoxide reductase complex, subunit 1 (VKORC1), transcript variant 1, mRNA,	chr16	31104634	31104683	CAATCCAACAGCATATTCGGTTGCATCTTCTACACACTACAGCTATTGTT
2680612	6.79261e-05	9.10337e-07	-3.70087	-1.88787	down	LOC389156	389156	PREDICTED: Homo sapiens misc_RNA (LOC389156), miscRNA,				GGAGCTTTTGGACGGAACCGCCATCTTCCAGTAATTCGCCAAAATGACAA
6840189	3.94884e-05	3.06611e-07	-3.69606	-1.88599	down	NDUFA2	4695	Homo sapiens NADH dehydrogenase (ubiquinone) 1 alpha subcomplex, 2, 8kDa (NDUFA2), mRNA,	chr5	140026877	140026926	ACGTGGAGCTGAAGAAGGCGAATCCCGACCTACCCATCCTAATCCGCGAA
2850520	4.23491e-05	3.64412e-07	-3.63845	-1.86332	down	DPM3	54344	Homo sapiens dolichyl-phosphate mannosyltransferase polypeptide 3 (DPM3), transcript variant 1, mRNA,	chr1	155112669	155112718	ACCATGACGAAATTAGCGCAGTGGCTTTGGGGACTAGCGATCCTGGGCTC
4670048	0.000472453	2.4992e-05	-3.63596	-1.86234	down	RPS26L	400156	Homo sapiens 40S ribosomal protein S26-like (RPS26L), non-coding RNA,	chr13	99990206	99990255	TCGATCTCGTGAAGCCCGCAAGGACCGAACACCCCCACCTCGATTTAGAC
2600278	1.77464e-05	2.18128e-08	-3.6349	-1.86192	down	C1orf54	79630	Homo sapiens chromosome 1 open reading frame 54 (C1orf54), mRNA,	chr1	148518689	148518738	GAACGATGCCGTGTCCAGTTTGCGAAGTCCTATTCCCCTCCTCCTGTCGC
2690561	0.00124243	0.000105069	-3.63194	-1.86074	down	RPLP1	6176	Homo sapiens ribosomal protein, large, P1 (RPLP1), transcript variant 1, mRNA,	chr15	67534876	67534925	CATGGGCTTTGGTCTTTTTGACTAAACCTCTTTTATAACATGTTCAATAA
5080367	1.47165e-05	8.33534e-09	-3.62755	-1.85899	down	CKLF	51192	Homo sapiens chemokine-like factor (CKLF), transcript variant 5, mRNA,	chr16	65144146	65144195	ACATCGCCCCTTCTGCTTCAGTGTGAAAGGCCACGTGAAGATGCTGCGGC
5960411	0.000166978	4.70653e-06	-3.61972	-1.85588	down	BCYRN1	618	Homo sapiens brain cytoplasmic RNA 1 (non-protein coding) (BCYRN1), non-coding RNA,	chr2	47416014	47416063	GGAGGATAGCTTGAGCCCAGGAGTTCGAGACCTGCCTGGGCAATATAGCG
830484	0.000140215	3.46727e-06	-3.61336	-1.85334	down	LOC441377	441377	PREDICTED: Homo sapiens similar to 40S ribosomal protein S26 (LOC441377), mRNA,				AGCTTCCCAAGCTGTATGTGAAGCTACCTTACTGTGTGAGTTGTGCAATT
2650193	0.00127719	0.00011067	-3.61212	-1.85285	down	SDC4	6385	Homo sapiens syndecan 4 (SDC4), mRNA,	chr20	43954284	43954333	ACTGGCTTAACGAGTCACAGCCTCAGCTGTGCTGGGACGACCCTTGTCTC
3840471	9.12963e-05	1.65405e-06	-3.60424	-1.8497	down	LOC728782	728782	PREDICTED: Homo sapiens similar to ribosomal protein L21 (LOC728782), mRNA,	chrX	74520862	74520911	ATGCCCTTTTGGCTGGAACCGCCATCTTCCAGTAATTCGCCAAAATGACG
6420541	3.16362e-05	1.90488e-07	-3.58588	-1.84233	down	UBL5	59286	Homo sapiens ubiquitin-like 5 (UBL5), transcript variant 2, mRNA,	chr19	9800531	9801670	CCACGTGTCTCTGGGGGACTATGAAATCCACGATGGGATGAACCTGGAGC
4200181	2.55947e-05	1.16408e-07	-3.57818	-1.83923	down	C19orf70	125988	Homo sapiens chromosome 19 open reading frame 70 (C19orf70), mRNA,	chr19	5679363	5679601	CCCCAGCTCCCAGCCCCTCCAAAGATTTACTTTCCCATCCGTGACTCCTG
4480356	6.79261e-05	9.07518e-07	-3.57314	-1.83719	down	LOC644928	644928	Homo sapiens hCG2033311 (LOC644928), mRNA,	chr1	58294431	58294480	GATCTCGTGAAGCCCGCAAGGACCGAACACCCCCATCCCGATTTAGACCT
6590593	8.06473e-05	1.24641e-06	-3.56025	-1.83198	down	ATP5J2	9551	Homo sapiens ATP synthase, H+ transporting, mitochondrial F0 complex, subunit F2 (ATP5J2), nuclear gene encoding mitochondrial protein, transcript variant 1, mRNA,	chr7	99055866	99055915	CCTTGGCCCGAGCCCCTCCGTGAGGAACACAATCTCAATCGTTGCTGAAT
2340736	0.000100167	2.01178e-06	-3.53922	-1.82343	down	LOC389156	389156	PREDICTED: Homo sapiens misc_RNA (LOC389156), miscRNA,	chr3	147025208	147025257	GAGCTTTTGGACGGAACCGCCATCTTCCAGTAATTCGCCAAAATGACAAA
6250408	0.000475623	2.53702e-05	-3.53548	-1.82191	down	RPL12P6	440176	PREDICTED: Homo sapiens misc_RNA (RPL12P6), miscRNA,	chr14	34279807	34279856	CGGCTTTCGGCTTGGAGGAGGCCAAGGTGCAACTTTCTTTGGTCATTCCG
2690338	8.83345e-05	1.51902e-06	-3.53359	-1.82114	down	RPS21	6227	Homo sapiens ribosomal protein S21 (RPS21), mRNA,	chr20	60395522	60395571	CGCCGATATCTCTGCCGGGTGACTAGCTGCTTCCTTTCTCTCTCGCGCGC
6620528	0.00261343	0.000310227	-3.52831	-1.81898	down	MT1X	4501	Homo sapiens metallothionein 1X (MT1X), mRNA,	chr16	55273897	55273946	CTGTCCCGCTGCGTGTTTTCCTCTTGATCGGGAACTCCTGCTTCTCCTTG
830768	0.000146652	3.74883e-06	-3.50002	-1.80736	down	FLJ43681	388574	PREDICTED: Homo sapiens similar to 60S ribosomal protein L23a (FLJ43681), miscRNA,	chr17	8936	8985	CCCCACGAGAAACAAGCTTGGCCACTATGCTATCATCAAGTTTCCGCTGG
6590377	6.62354e-05	8.64492e-07	-3.49681	-1.80604	down	RPS26	6231	Homo sapiens ribosomal protein S26 (RPS26), mRNA,	chr12	54722494	54722543	AATGGTCGTGCCAAAAAGGGCCGCGGCCACGTGCAGCCTATTCGCTGCAC
5720102	0.000183123	5.67244e-06	-3.49059	-1.80347	down	C7orf55	154791	Homo sapiens chromosome 7 open reading frame 55 (C7orf55), nuclear gene encoding mitochondrial protein, mRNA,	chr7	139026229	139030256	GGCCTATCGGTACCTTGTGAAGGCTTTCCGTGCACATCGGGTCACCAGTG
5420301	0.00105988	8.31596e-05	-3.48385	-1.80068	down	LOC645979	645979	PREDICTED: Homo sapiens similar to ribosomal protein S26 (LOC645979), mRNA,				TGTGAAGCTACATTACTGTGTGAGTTGTGCAATTCACAGCAAAGTAGTCA
1770102	3.83124e-05	2.73029e-07	-3.4809	-1.79946	down	NDUFB3	4709	Homo sapiens NADH dehydrogenase (ubiquinone) 1 beta subcomplex, 3, 12kDa (NDUFB3), mRNA,	chr2	201651947	201658432	CCAGAAGAAGCTGGCTGCAAAAGGGCTAAGGGATCCATGGGGCCGCAATG
2630195	5.58435e-05	6.36244e-07	-3.47753	-1.79806	down	VAMP5	10791	Homo sapiens vesicle-associated membrane protein 5 (myobrevin) (VAMP5), mRNA,	chr2	85673689	85673738	CATCCTGATTGTGCTGCTGGTCGTCTTTCTCCCTCAGAGCAGTGACAGCA
2120377	2.95154e-05	1.64586e-07	-3.47548	-1.79721	down	LOC100130561	100130561	PREDICTED: Homo sapiens similar to high-mobility group (nonhistone chromosomal) protein 1-like 10, transcript variant 2 (LOC100130561), mRNA,				CCGGACGGGCACTGGGCGACTGTGCCTCGCTGAGGAAAAATAACTAAACA
2630474	9.00801e-05	1.59975e-06	-3.47114	-1.79541	down	MLLT11	10962	Homo sapiens myeloid/lymphoid or mixed-lineage leukemia (trithorax homolog, Drosophila); translocated to, 11 (MLLT11), mRNA,	chr1	149307256	149307305	CCCTTCTTCACACCTACTCACTTTACAACTTTGCTCCTAACTGTGGGTTG
3390093	5.34391e-05	5.82231e-07	-3.45578	-1.78901	down	BOLA3	388962	Homo sapiens bolA homolog 3 (E, coli) (BOLA3), transcript variant 2, mRNA,	chr2	74362705	74362754	GGATTGCGGATATTTACCTCTGTCCCCAAACGCTGACCACGCCCTGGCTG
7000040	0.000167803	4.78288e-06	-3.43938	-1.78215	down	LOC729236	729236	PREDICTED: Homo sapiens misc_RNA (LOC729236), miscRNA,				GGGCCTTACTCCTTCACAGATCGGTGTAATCGTGAGAGAATCACATGGTG
1450377	0.000311475	1.33292e-05	-3.41242	-1.77079	down	BLOC1S1	2647	Homo sapiens biogenesis of lysosome-related organelles complex-1, subunit 1 (BLOC1S1), mRNA,	chr12	54399256	54399580	TTCAACCAGGCACTCAAGGAAATTGGGGATGTGGAGAACTGGGCTCGGAG
4040307	5.44452e-05	6.00335e-07	-3.39906	-1.76514	down	LOC729500	729500	PREDICTED: Homo sapiens misc_RNA (LOC729500), partial miscRNA,	chr1	15991858	15991907	CCACACCAGCCACCTCCACCATGCCGTGAAGTTTGACCCCAGAGAGATCA
1050619	3.5395e-05	2.3718e-07	-3.39889	-1.76506	down	NPM3	10360	Homo sapiens nucleophosmin/nucleoplasmin, 3 (NPM3), mRNA,	chr10	103531194	103531243	GAGGGCCTGTGCTCCACACAGCCGTGGTTTTCTGATTTTCACCATGCCCG
6290296	3.16362e-05	1.91771e-07	-3.38069	-1.75732	down	NDUFB7	4713	Homo sapiens NADH dehydrogenase (ubiquinone) 1 beta subcomplex, 7, 18kDa (NDUFB7), nuclear gene encoding mitochondrial protein, mRNA,	chr19	14677068	14677616	AAGCAGGAGCGGCACGACTGGGACTACTGCGAGCACCGCGACTATGTGAT
5090050	3.57211e-05	2.44431e-07	-3.37558	-1.75514	down	NDUFA12	55967	Homo sapiens NADH dehydrogenase (ubiquinone) 1 alpha subcomplex, 12 (NDUFA12), mRNA,	chr12	95397375	95397424	TGCAGCAGATCACCGGCCACGGCGGTCTCCGAGGCTATCTACGGGTTTTT
110682	2.15896e-05	8.03724e-08	-3.37498	-1.75488	down	S100A11	6282	Homo sapiens S100 calcium binding protein A11 (S100A11), mRNA,	chr1	152005037	152005086	CTGTCATCATCTCCACAGCCCACCCATCCCCTGAGCACACTAACCACCTC
6370762	3.34919e-05	2.09188e-07	-3.37455	-1.75469	down	POLR2F	5435	Homo sapiens polymerase (RNA) II (DNA directed) polypeptide F (POLR2F), mRNA,	chr22	36693578	36693627	AGGCCCGAAAGATCCCCATCATCATTCGCCGTTACCTGCCAGATGGGAGC
4810725	0.00026508	1.00509e-05	-3.37206	-1.75363	down	LOC729769	729769	PREDICTED: Homo sapiens similar to Ubiquinol-cytochrome c reductase hinge protein (LOC729769), mRNA,	chr2	26071311	26071360	AAGGCCCAGGAGTGGCTGGAGCTCTGTGATGAGTGTGTATCCTCTCAATC
650735	0.000247376	9.02499e-06	-3.36958	-1.75257	down	LOC100131205	100131205	PREDICTED: Homo sapiens hypothetical protein LOC100131205, transcript variant 3 (LOC100131205), mRNA,				GTGCGTATTGAGCACATTAAGCATTCTAAGAGCCGAGATAGCTTCCTGAA
3440338	4.1957e-05	3.57017e-07	-3.36921	-1.75241	down	RNF181	51255	Homo sapiens ring finger protein 181 (RNF181), mRNA,	chr2	85677765	85678080	GAGCTGCCCACTGATGACGACACTTATGAGGAGCACAGACGAGATAAGGC
2260168	2.12871e-05	6.91761e-08	-3.35812	-1.74765	down	LOC731640	731640	PREDICTED: Homo sapiens similar to 60S ribosomal protein L21, transcript variant 2 (LOC731640), mRNA,				ACGGGAAGCAGCCTGAGCTGCTGGAACCTATTTCCTATGAATTCATGGCA
520468	3.94884e-05	3.06579e-07	-3.35417	-1.74596	down	LOC402175	402175	PREDICTED: Homo sapiens misc_RNA (LOC402175), miscRNA,				GGCCACTGTGCCTGAGACCCTCGACCCAGCCGAATACAACATATCTCTGG
4200056	0.000118876	2.61294e-06	-3.34681	-1.74279	down	LOC100131785	100131785	PREDICTED: Homo sapiens misc_RNA (LOC100131785), miscRNA,	chr7	104958000	104958049	CTTTGAAGACTTGGGGTTGGTAGTAGATTGGGACCACCACCTGCCTCCAC
4260441	0.00130724	0.000114433	-3.34439	-1.74174	down	CLEC3B	7123	Homo sapiens C-type lectin domain family 3, member B (CLEC3B), mRNA,	chr3	45052268	45052317	CCCGCATCGCCTACAAGAACTGGGAGACTGAGATCACCGCGCAACCCGAT
2320367	8.06473e-05	1.24145e-06	-3.33006	-1.73555	down	NDUFA13	51079	Homo sapiens NADH dehydrogenase (ubiquinone) 1 alpha subcomplex, 13 (NDUFA13), mRNA,				CATCATGAAGGACGTGCCCGACTGGAAGGTGGGGGAGTCTGTGTTCCACA
20435	3.08761e-05	1.82815e-07	-3.32987	-1.73546	down	LOC729279	729279	PREDICTED: Homo sapiens misc_RNA (LOC729279), miscRNA,				AAGCCTGCCACCTCCTACGCGCGGACCACCATCAACAAGAATGCTGGCGT
2850142	0.000234217	8.18783e-06	-3.3222	-1.73214	down	LOC100129650	100129650	PREDICTED: Homo sapiens misc_RNA (LOC100129650), miscRNA,				TCCCCGATTTAGACCTGCGGGTGCTTCCCCATGACCCCCACCAAAGCCCA
2640411	1.77464e-05	3.52087e-08	-3.30788	-1.72591	down	UNC84B	25777	Homo sapiens unc-84 homolog B (C, elegans) (UNC84B), mRNA,	chr22	39130814	39130863	CTCCATCCCGAGGCAGCCAGGGTTTGTTTTGCGCTCTCCTGTCACAAATG
4760112	2.34332e-05	9.47131e-08	-3.28739	-1.71694	down	ATP5J2	9551	Homo sapiens ATP synthase, H+ transporting, mitochondrial F0 complex, subunit F2 (ATP5J2), nuclear gene encoding mitochondrial protein, transcript variant 3, mRNA,	chr7	99055865	99055914	CTTGGCCCGAGCCCCTCCGTGAGGAACACAATCTCAATCGTTGCTGAATC
6370468	0.000238087	8.39871e-06	-3.28406	-1.71548	down	BOLA2	552900	Homo sapiens bolA homolog 2 (E, coli) (BOLA2), mRNA,	chr16	29464999	29465048	GTGAACGCGTGCCTAGCAGAAGAGCTCCCGCACATCCATGCCTTTGAACA
6270307	9.69762e-05	1.8601e-06	-3.25816	-1.70406	down	LOC644934	644934	PREDICTED: Homo sapiens similar to 40S ribosomal protein S26, transcript variant 1 (LOC644934), mRNA,	chr15	62672248	62672297	GAACAATGGTCGTGCCAAAAAGGGCCGCGGCCACATGCAGCCTATTCGCT
6960373	0.000124098	2.8203e-06	-3.24824	-1.69966	down	LOC644191	644191	PREDICTED: Homo sapiens similar to hCG15685, transcript variant 1 (LOC644191), mRNA,	chr17	41041729	41041778	AAAAGAAGGAACAATGGTCGTGCCAAAAAGGGCCGCGGCCACGTGCAGCC
5090484	0.000298318	1.2396e-05	-3.2458	-1.69857	down	LOC389342	389342	PREDICTED: Homo sapiens similar to QM protein, transcript variant 11 (LOC389342), mRNA,				CCTAAAAGATATATGCGCTCTTTCCCTTCGGTGTGCCACTGAAGATCCTG
1010768	9.28274e-05	1.71141e-06	-3.24534	-1.69837	down	NDUFB6	4712	Homo sapiens NADH dehydrogenase (ubiquinone) 1 beta subcomplex, 6, 17kDa (NDUFB6), nuclear gene encoding mitochondrial protein, transcript variant 1, mRNA,	chr9	32572968	32573017	AGCTGCGAGAGCTGAGAAGGCGATGGCTGAAGGACCAGGAGCTGAGCCCT
6840746	0.000289718	1.18126e-05	-3.24384	-1.6977	down	LOC728823	728823	PREDICTED: Homo sapiens misc_RNA (LOC728823), miscRNA,	chr17	8405395	8405444	TCGAAACACAGTGGAGGCCGCAGCAGTCAGGGGCATTCTGAAGCAAGTGT
540240	0.000163002	4.50286e-06	-3.24195	-1.69686	down	LOC440957	440957	Homo sapiens similar to CG32736-PA (LOC440957), mRNA,	chr3	52570714	52570763	CGTCCGGGCGATCCAGTGCTTAGTTCCGTCATATCCCTCTCCACGACCTC
3990598	4.97106e-05	5.02754e-07	-3.2164	-1.68545	down	DRAP1	10589	Homo sapiens DR1-associated protein 1 (negative cofactor 2 alpha) (DRAP1), mRNA,	chr11	65445458	65445507	GGACGAAGAAGATTACGACTCCTAGCGCCTTCTGCCCCCCAGACCATAGC
5090731	9.4617e-05	1.77185e-06	-3.20142	-1.67871	down	CRIPT	9419	Homo sapiens cysteine-rich PDZ-binding protein (CRIPT), mRNA,	chr2	46705229	46705278	GGCATCCAGAGTTAACATTTCTCCCCTCACTCCCTTGCTGGTGTCATAGT
5860148	7.99731e-05	1.21272e-06	-3.19502	-1.67582	down	S100A13	6284	Homo sapiens S100 calcium binding protein A13 (S100A13), transcript variant 3, mRNA,	chr1	153591346	153591395	AAGACCTGAAGATCAGGAAGAAGTAAAGCCGCCTGGCTGAGATGGGGTGG
130390	0.002113	0.000226846	-3.19085	-1.67394	down	OLFML1	283298	Homo sapiens olfactomedin-like 1 (OLFML1), mRNA,	chr11	7489027	7489076	TTCCTCCAGAAAACCAGTCTAAGGGTGAGGACCCCAACTCTAGCCTCCTC
1500538	0.000374133	1.73901e-05	-3.18918	-1.67318	down	LOC645138	645138	PREDICTED: Homo sapiens similar to ribosomal protein S11 (LOC645138), mRNA,	chr16	66447392	66447441	CGGCCCCTGAGCAAGACAGTACGCTTCAACGTGCTCAAGGTCACCAAGGC
5080600	7.67036e-05	1.12574e-06	-3.18854	-1.6729	down	LOC100132457	100132457	PREDICTED: Homo sapiens similar to Sm protein G (LOC100132457), mRNA,				GGCTGTTCAGCAGAGAAACCCATGTCCTCTCTTCATAGGTTCTATTTTAC
1450477	3.50704e-05	2.27544e-07	-3.18582	-1.67166	down	SIVA1	10572	Homo sapiens SIVA1, apoptosis-inducing factor (SIVA1), transcript variant 2, mRNA,	chr14	104293990	104294039	ATCTGGGGTAGCGTCCATTGCCTGTTCCTCATGCGTGCGAGCCGTGGATG
5720520	0.000183123	5.67451e-06	-3.17883	-1.66849	down	SNHG6	641638	Homo sapiens small nucleolar RNA host gene 6 (non-protein coding) (SNHG6), non-coding RNA,	chr8	68000261	68000310	AGGGAGGAAGAAGCGCGAAGAGCCGTTAGTCATGCCGGTGTGGTGGCGGC
6450424	1.77464e-05	3.9393e-08	-3.17283	-1.66577	down	NME3	4832	Homo sapiens non-metastatic cells 3, protein expressed in (NME3), mRNA,	chr16	1820484	1820533	AACATCCACCTGTCTGGACGTTGCATGGAGGGTGGCGCAGGCCTCTCCAA
60148	0.000134991	3.17794e-06	-3.17096	-1.66492	down	BOLA2	552900	Homo sapiens bolA homolog 2 (E, coli) (BOLA2), mRNA,	chr16	29465524	29465573	ATGGAACTCAGCGCCGAATACCTCCGCGAGAAGCTGCAGCGGGACCTGGA
6900215	2.08521e-05	6.35803e-08	-3.16766	-1.66342	down	GTF2H5	404672	Homo sapiens general transcription factor IIH, polypeptide 5 (GTF2H5), mRNA,	chr6	158533002	158533051	CTGCCATGAAGCAGTTTCTGCTGTACTTGGATGAGTCCAATGCCCTGGGG
2230187	4.70356e-05	4.46324e-07	-3.15642	-1.65829	down	MAPBPIP	28956	Homo sapiens mitogen-activated protein-binding protein-interacting protein (MAPBPIP), mRNA,	chr1	154291767	154291816	GGGCCGCCTACGACCGGAACGGGAACCAAGCGTTTAATGAAGACAATCTC
520672	0.000278347	1.11023e-05	-3.14999	-1.65535	down	LOC391833	391833	PREDICTED: Homo sapiens misc_RNA (LOC391833), miscRNA,				GGCCATGCAGTCTTCCAAGTCCCGGGGCTATGTGAAGGAACAGTTTGCTT
780364	0.000103993	2.13764e-06	-3.14559	-1.65333	down	LOC645157	645157	PREDICTED: Homo sapiens misc_RNA (LOC645157), miscRNA,	chr6	19252331	19252380	GCCTGAGCTGCTGGAACCTCTTCCCTATGAATTCATGGCCTCGTACGTGT
5360156	0.000140215	3.48284e-06	-3.14447	-1.65282	down	IFITM1	8519	Homo sapiens interferon induced transmembrane protein 1 (9-27) (IFITM1), mRNA,	chr11	305174	305223	GGCTGTTGCCCCTGCCCCCTTGGTCCTGCCCCTAGATACAGCAGTTTATA
5690369	9.44605e-05	1.76496e-06	-3.1386	-1.65012	down	LOC100131205	100131205	PREDICTED: Homo sapiens hypothetical protein LOC100131205 (LOC100131205), mRNA,	chr1	210291974	210304666	CAACCAAGATCTTCTTTTCGGCCGGAACCGCCATCTTCCAGTAATTCGCC
4560164	0.000114179	2.46129e-06	-3.11939	-1.64126	down	PDLIM7	9260	Homo sapiens PDZ and LIM domain 7 (enigma) (PDLIM7), transcript variant 4, mRNA,	chr5	176917287	176917336	CATCTGACACTGCCTTCCCTCTTTGCCCTGTGGTACTGCTGTCTGCCAGG
2360082	5.24225e-05	5.6242e-07	-3.11666	-1.64	down	LOC100134537	100134537	PREDICTED: Homo sapiens misc_RNA (LOC100134537), miscRNA,	chr7	104531195	104531244	GGCTGGGCAGCCATGGCGTCCTATATCGATGAACACGACTGTGAGCCGTT
2100196	0.00011027	2.33011e-06	-3.10363	-1.63396	down	ISG15	9636	Homo sapiens ISG15 ubiquitin-like modifier (ISG15), mRNA,	chr1	939540	939589	ACCTGAAGCAGCAAGTGAGCGGGCTGGAGGGTGTGCAGGACGACCTGTTC
580369	1.40057e-05	1.27918e-09	-3.10162	-1.63302	down	NDUFS4	4724	Homo sapiens NADH dehydrogenase (ubiquinone) Fe-S protein 4, 18kDa (NADH-coenzyme Q reductase) (NDUFS4), mRNA,	chr5	52977978	52990172	GGGTTGGGCATCAACGGCTGATCCCTTATCCAACATGGTTCTAACCTTCA
2480338	1.99814e-05	5.80916e-08	-3.09136	-1.62824	down	DBI	1622	Homo sapiens diazepam binding inhibitor (GABA receptor modulator, acyl-Coenzyme A binding protein) (DBI), mRNA,	chr2	119841678	119842270	CACTGGGACAGAGGCTGAGTTTGAGAAAGCTGCAGAGGAGGTTAGGCACC
6280224	0.00241102	0.000277646	-3.08777	-1.62656	down	CYP26B1	56603	Homo sapiens cytochrome P450, family 26, subfamily B, polypeptide 1 (CYP26B1), mRNA,	chr2	72356794	72356843	AGCACTTTCGATGTTGGGCGCTGGCGTTTGTGTTCTGGGCACCACCGTGA
3130291	4.24756e-05	3.73179e-07	-3.08324	-1.62445	down	C12orf57	113246	Homo sapiens chromosome 12 open reading frame 57 (C12orf57), mRNA,	chr12	6923970	6924019	TAACGCCTGCAACGACATGGGTAAGATGCTGCAATTCGTGCTGCCCGTGG
3460066	8.06473e-05	1.24734e-06	-3.08161	-1.62368	down	ROBLD3	28956	Homo sapiens roadblock domain containing 3 (ROBLD3), mRNA,				CTCACCCAAGTGGCGGCATCTTAACGGCATTGGTGGAAGCTGGGGTCAGA
4560246	8.31735e-05	1.37358e-06	-3.08062	-1.62322	down	ATP5I	521	Homo sapiens ATP synthase, H+ transporting, mitochondrial F0 complex, subunit E (ATP5I), nuclear gene encoding mitochondrial protein, mRNA,	chr4	668058	668107	AGGCTTTGCTGGCTTGTGCGGCATCCTGCTCCGTCTGCAGGTTGTGCTTC
5310241	2.95154e-05	1.6848e-07	-3.07973	-1.62281	down	TOMM5	401505	Homo sapiens translocase of outer mitochondrial membrane 5 homolog (yeast) (TOMM5), nuclear gene encoding mitochondrial protein, transcript variant 1, mRNA,	chr9	37592457	37592506	CGCCGAAGCTGGACCCGGAGGAGATGAAACGGAAGATGCGCGAGGATGTG
2750066	7.14951e-05	9.65773e-07	-3.07453	-1.62037	down	LOC100132499	100132499	PREDICTED: Homo sapiens similar to mCG7602 (LOC100132499), mRNA,	chr7	102776273	102776322	CTGAGACCAAGATGGGTCACCAGAAGCTATGCTGGAGCCACCCGCGAAAA
1240685	0.000181358	5.5685e-06	-3.0655	-1.61612	down	PDCD5	9141	Homo sapiens programmed cell death 5 (PDCD5), mRNA,	chr19	33075862	33075911	AGAAATGAGAAACAGTATCTTAGCCCAAGTTCTGGATCAGTCGGCCCGGG
7150433	2.12871e-05	6.85605e-08	-3.06546	-1.6161	down	TCTEX1D2	255758	Homo sapiens Tctex1 domain containing 2 (TCTEX1D2), mRNA,	chr3	197507304	197518226	AGAGGTGAAGGAGTATTCATGGCTTCTCGCTGTTTCTGGGATGCTGACAC
3120139	4.24756e-05	3.72508e-07	-3.06229	-1.61461	down	NENF	29937	Homo sapiens neuron derived neurotrophic factor (NENF), mRNA,	chr1	210685989	210686038	CAGGTTCTTGGGAGCGTGAGGCAGGAAGACACTAGGTGCTGAATCTCCTG
150100	7.57935e-05	1.07801e-06	-3.04649	-1.60715	down	S100A3	6274	Homo sapiens S100 calcium binding protein A3 (S100A3), mRNA,	chr1	153519825	153519874	GCAGAGCGTGCACCAATGAGACCACGATGGGAAAGGGCCTATTTAACTCC
7210544	4.05002e-05	3.42445e-07	-3.04377	-1.60586	down	LOC100133328	100133328	PREDICTED: Homo sapiens misc_RNA (LOC100133328), miscRNA,	chr1	224381703	224381752	CGTGGTTGCAGAGCCCTAGTCCTGATGGCCCCCGGTGGCATACATTGAAT
1090653	5.13787e-05	5.35555e-07	-3.04049	-1.6043	down	C1orf133	574036	Homo sapiens chromosome 1 open reading frame 133 (C1orf133), non-coding RNA, XM_001720763	chr1	210405073	210406985	CGAGGAGTGATCCTCCGACTGTGAAAAACCAGACCTCTGGCTGCCTGGCT
540131	2.95154e-05	1.6545e-07	-3.03997	-1.60406	down	PXMP2	5827	Homo sapiens peroxisomal membrane protein 2, 22kDa (PXMP2), mRNA,	chr12	131788025	131791323	GAAGTTCCGGGTGCTCTTCGCCAACCTGGCAGCTCTGTTCTGGTATGCCT
2570463	8.83252e-05	1.51567e-06	-3.02749	-1.59812	down	LOC728492	728492	PREDICTED: Homo sapiens similar to small EDRK-rich factor 1A, telomeric, transcript variant 4 (LOC728492), mRNA,	chr5	70239388	70239437	GATGACTGGCTATTTGGAAAACCTGGGTGCTACTGCCAACTGGGTGTATC
4760288	4.03979e-05	3.27913e-07	-3.02733	-1.59805	down	ANAPC11	51529	Homo sapiens anaphase promoting complex subunit 11 (ANAPC11), transcript variant 4, mRNA,	chr17	77451214	77451263	AATGGAAGTTCAAGGAGTGAGGCCCGACCTGGCTCTCGCTGGAGGGGCAT
7160475	0.000249321	9.11532e-06	-3.02083	-1.59495	down	C6orf160	387066	PREDICTED: Homo sapiens chromosome 6 open reading frame 160, transcript variant 4 (C6orf160), mRNA,				GCAGCTCTGAAGATGCAAAGTGAGGGTCGCTGTCTGCCCATTGATAGAGG
2710451	0.000118876	2.6249e-06	-3.01994	-1.59452	down	LOC651894	651894	PREDICTED: Homo sapiens similar to ribosomal protein S12 (LOC651894), mRNA,				TTGGGCTTCACCCATAACCCACTGCCATGGCCGAGGAACGCATTGCTGTT
2320291	9.54792e-05	1.81446e-06	-3.01559	-1.59244	down	MGC87895	644068	PREDICTED: Homo sapiens similar to ribosomal protein S14 (MGC87895), mRNA,				GAAGGCAGACCGAGATGAATCCTCGCCATATGCTGCTATGTTGACCACCC
4180431	0.000208312	6.90557e-06	-3.01253	-1.59097	down	LOC205251	205251	PREDICTED: Homo sapiens misc_RNA (LOC205251), miscRNA,				AACCGACTGCGGAGGCGCTACTTGGACTGGAGGAAAAGGAGGCTGCAGGA
1010347	3.57211e-05	2.42762e-07	-3.01122	-1.59035	down	POLR2I	5438	Homo sapiens polymerase (RNA) II (DNA directed) polypeptide I, 14,5kDa (POLR2I), mRNA,	chr19	41296961	41297097	GATCACGCACGAAGTGGACGAACTGACCCAGATTATCGCCGACGTGTCCC
6520576	8.12011e-05	1.29181e-06	-3.00699	-1.58832	down	BOLA3	388962	Homo sapiens bolA homolog 3 (E, coli) (BOLA3), transcript variant 1, mRNA,	chr2	74362708	74362757	CATGGATTGCGGATATTTACCTCTGTCCCCAAACGCTGACCACGCCCTGG
2900470	5.58435e-05	6.37551e-07	-3.00498	-1.58735	down	LOC388532	388532	PREDICTED: Homo sapiens similar to ribosomal protein L21 (LOC388532), mRNA,				AACCAATGAGAAGGAGCCTGAGCTGCTGGAACCTATTCCGTATGAACTCA
5290220	0.000174347	5.19857e-06	-3.00137	-1.58562	down	LOC100129599	100129599	PREDICTED: Homo sapiens similar to mCG7602 (LOC100129599), mRNA,				CGGCCTCAATATGTGCCGCCGGTGTTTCCATCAGTATGCAAAGGACATAG
3850110	4.97106e-05	5.04102e-07	-2.99665	-1.58335	down	COX6A1	1337	Homo sapiens cytochrome c oxidase subunit VIa polypeptide 1 (COX6A1), nuclear gene encoding mitochondrial protein, mRNA,	chr12	119360625	119360674	TGAATGTGTACCTGAAGTCGCACCACGGAGAGCACGAGAGACCCGAGTTC
6250537	1.77464e-05	3.13111e-08	-2.9927	-1.58145	down	LOC729500	729500	PREDICTED: Homo sapiens misc_RNA (LOC729500), partial miscRNA,				CTGAGGTGCACTGGAGGTGAAGTCGCTGCTTCTGCGCTGGCCCCCAAGAT
1510019	0.000344878	1.54337e-05	-2.98671	-1.57856	down	MGST2	4258	Homo sapiens microsomal glutathione S-transferase 2 (MGST2), mRNA,	chr4	140624690	140625218	GGATCACCGGTTTCCGACTGAGTCTGGGGATTTTGGCCTTGTTGACCCTC
5720398	6.31471e-05	7.8584e-07	-2.98578	-1.57811	down	NDUFAF2	91942	Homo sapiens NADH dehydrogenase (ubiquinone) 1 alpha subcomplex, assembly factor 2 (NDUFAF2), mRNA,	chr5	60484420	60484469	GGCCATGCCTCTGCTCCATACTTTGGAAAGGAAGAACCCTCAGTGGCTCC
5820292	0.000198857	6.34537e-06	-2.96622	-1.56862	down	COPZ2	51226	Homo sapiens coatomer protein complex, subunit zeta 2 (COPZ2), mRNA,	chr17	46103702	46103751	TTCCCCAATCCTGGCAAAAGCCCAAAGATCCCAGGGTCAGGAGAGACCCC
2100678	5.53942e-05	6.20984e-07	-2.96351	-1.56731	down	DNTTIP1	116092	Homo sapiens deoxynucleotidyltransferase, terminal, interacting protein 1 (DNTTIP1), mRNA,	chr20	43873184	43873233	GGAGACACTACGGACAGAGAATGAGCATCGTGCTGTTGAAGCACCTCCAC
6660193	0.000288745	1.17423e-05	-2.96204	-1.56659	down	NDUFB9	4715	Homo sapiens NADH dehydrogenase (ubiquinone) 1 beta subcomplex, 9, 22kDa (NDUFB9), mRNA,	chr8	125559303	125559352	TGCCAAGAGAGAACAGTGGAAGAAACTGCGGAGGGAAAGCTGGGAACGAG
1450082	0.000291956	1.19515e-05	-2.96026	-1.56572	down	TRAPPC2L	51693	Homo sapiens trafficking protein particle complex 2-like (TRAPPC2L), mRNA,	chr16	87454907	87454956	ACGACTGTGGTGGGGCCGTCGGTCTGTTCTGGTTGCCTCTTCCTGAATGG
5310411	2.08521e-05	6.31086e-08	-2.9553	-1.56331	down	H2AFJ	55766	Homo sapiens H2A histone family, member J (H2AFJ), transcript variant 1, mRNA,	chr12	14818948	14818997	GAGTTAAACAAGCTGCTGGGCAAAGTGACCATCGCTCAGGGCGGCGTCCT
2470484	0.000168798	4.8476e-06	-2.94167	-1.55664	down	RNASEK	440400	Homo sapiens ribonuclease, RNase K (RNASEK), mRNA,	chr17	6858284	6858333	CTGCCAAGTTCGGCTCAATAAGCGCAAGGAATACATGGTGCGCTAGGGCC
6330039	4.54388e-05	4.09268e-07	-2.94091	-1.55626	down	HMGB1L1	10357	Homo sapiens high-mobility group box 1-like 1 (HMGB1L1), mRNA,	chr20	56063910	56063959	TCTAACAAGTGCTCAGAGAGGTGGAAGACCATGTCTGCTAAAGAGAAAGG
2360593	1.47165e-05	8.8391e-09	-2.93934	-1.55549	down	DDT	1652	Homo sapiens D-dopachrome tautomerase (DDT), transcript variant 1, mRNA,	chr22	24313754	24313803	TCCGCTTTTTCCCCTTGGAGTCCTGGCAGATTGGCAAGATAGGGACGGTC
4150458	0.000188073	5.90792e-06	-2.93143	-1.5516	down	RPA3	6119	Homo sapiens replication protein A3, 14kDa (RPA3), mRNA,	chr7	7680227	7680276	TCTCTGGAATTGTGGAAGTGGTTGGAAGAGTAACCGCCAAGGCCACCATC
6620360	0.000181394	5.58233e-06	-2.91872	-1.54533	down	C12orf62	84987	Homo sapiens chromosome 12 open reading frame 62 (C12orf62), mRNA,	chr12	48800221	48800270	CCCAGCGCCAGGCCGCAGAAGAACAGAAGACCTCAGGAATCATGTAGAAC
6840056	3.97393e-05	3.10427e-07	-2.9003	-1.5362	down	MYL6B	140465	Homo sapiens myosin, light chain 6B, alkali, smooth muscle and non-muscle (MYL6B), mRNA,	chr12	54837753	54837948	CTTGAAACACATCCTAAGCGTCTGAGTGCTGCAGATCCAGTGGGGTCCGG
2230167	0.00384052	0.000535328	-2.89178	-1.53196	down	LOC653773	653773	PREDICTED: Homo sapiens similar to ribosomal protein L31 (LOC653773), mRNA,				TCAACATTCACAAGCGCATCCATGGAGAGGGCTTCAAGAAGCGTGCTCCT
4150600	0.00039025	1.85128e-05	-2.89074	-1.53144	down	EIF1AY	9086	Homo sapiens eukaryotic translation initiation factor 1A, Y-linked (EIF1AY), mRNA,	chrY	21163653	21163702	CTGAGGATGGTTCTACAGTTGGGATTTTGGCCATCATCAACCAAGAAGAG
1980600	2.12871e-05	7.55962e-08	-2.87536	-1.52374	down	LOC645058	645058	PREDICTED: Homo sapiens similar to hepatitis B virus x-interacting protein (LOC645058), mRNA,	chr1	62277178	62277227	CACTTAATCTGGGTTGCCATGGGACCCTGTCAGATGAGCATGCTGGAGTG
5390095	0.00143283	0.000130703	-2.87124	-1.52167	down	RASSF2	9770	Homo sapiens Ras association (RalGDS/AF-6) domain family 2 (RASSF2), transcript variant 2, mRNA,	chr20	4708746	4708795	GATGCGTTTACTCATCTAACATAATCTGACAGGGCCTCAGCAAGGGAGCC
3460184	3.66528e-05	2.54705e-07	-2.87051	-1.52131	down	C19orf53	28974	Homo sapiens chromosome 19 open reading frame 53 (C19orf53), mRNA,	chr19	13750184	13750233	GATACAGTCACTAACTTCATCTGTCCCCGTGCCCCTTCCCAGGTCCTGCC
2320672	2.61689e-05	1.24328e-07	-2.86901	-1.52055	down	LOC728820	728820	PREDICTED: Homo sapiens misc_RNA (LOC728820), miscRNA,				AGATCCCAAAGGGTGTCAGCCGCAAGCTCAACTTGCCTACACTGTCCACC
4210066	2.18692e-05	8.37396e-08	-2.86754	-1.51981	down	DEF8	54849	Homo sapiens differentially expressed in FDCP 8 homolog (mouse) (DEF8), transcript variant 2, mRNA,	chr16	88553067	88553116	GGGCCGAGACCCAGACGAGGAGTGAGGAATGAGAGAGACCAAAGTTCCTG
6220441	0.00017073	4.94545e-06	-2.86748	-1.51979	down	CISD1	55847	Homo sapiens CDGSH iron sulfur domain 1 (CISD1), mRNA,	chr10	59717475	59717524	GAATGACTACCACCTCTGTCTGATTCACCTTCGCTGGATTCTAAATGTGG
6580253	3.94884e-05	3.06593e-07	-2.85815	-1.51508	down	SERF1B	728492	Homo sapiens small EDRK-rich factor 1B (centromeric) (SERF1B), mRNA,	chr5	69321216	69321265	AGAGTGCCAGAGAACCGTTGCTTTTCCGAGTTGCTCTTCTTCCAGGCTCC
6860653	1.47165e-05	1.32518e-08	-2.85474	-1.51336	down	HBXIP	10542	Homo sapiens hepatitis B virus x interacting protein (HBXIP), mRNA,	chr1	110944148	110944197	ATGATCCAGAAACACGATGGCATCACGGTGGCAGTGCACAAAATGGCCTC
2480064	1.47165e-05	1.19938e-08	-2.85008	-1.511	down	C20orf199	441951	Homo sapiens chromosome 20 open reading frame 199 (C20orf199), transcript variant 3, non-coding RNA,	chr20	47329054	47329103	GCAGCCAGCGGGTACAGAATGGATTTTGGAAGAGGGAGTCACCACTGGAC
6450050	1.77464e-05	4.20107e-08	-2.85001	-1.51097	down	NDUFB6	4712	Homo sapiens NADH dehydrogenase (ubiquinone) 1 beta subcomplex, 6, 17kDa (NDUFB6), nuclear gene encoding mitochondrial protein, transcript variant 1, mRNA,	chr9	32572920	32572969	CTCGGGAGCCGGTGCTGCCCCCACAGAAGATGGGGCCTATGGAGAAATTC
4670487	0.000190976	6.03295e-06	-2.84881	-1.51036	down	SIVA	10572	Homo sapiens CD27-binding (Siva) protein (SIVA), transcript variant 2, mRNA,	chr14	104296937	104296986	CGGTGTTCACACTGAACTGTGGGGTCGACGGGAGGGGTGCCTTTTACATG
4200025	0.000181537	5.59318e-06	-2.84799	-1.50995	down	OAF	220323	Homo sapiens OAF homolog (Drosophila) (OAF), mRNA,	chr11	119605657	119605706	ATCACAGACCACGAGTGCCTTTCCCGGACCTGGACGTTGCCTCCAGAGCA
7330068	8.20447e-05	1.33467e-06	-2.82976	-1.50068	down	SF3B5	83443	Homo sapiens splicing factor 3b, subunit 5, 10kDa (SF3B5), mRNA,	chr6	144457951	144458000	TAAGTATTCCTGTCTCCAAAGGACCGGCTCTCCATGGCTCCTGCGCCTCG
3830605	1.77464e-05	3.31293e-08	-2.82867	-1.50012	down	DNLZ	728489	Homo sapiens DNL-type zinc finger (DNLZ), mRNA,	chr9	139256412	139256461	TCCTGCGCTCCCCGGCACTGTGGGACTTCGGCCTTCCAGAAGGAGGTTTT
2060181	0.000135445	3.21343e-06	-2.82656	-1.49905	down	SNHG8	100093630	Homo sapiens small nucleolar RNA host gene 8 (non-protein coding) (SNHG8), non-coding RNA,	chr4	119200266	119200566	CGAGAACCGTCAGTTTGAGCCAGATGGAAGCTGAGCTGAACACATTACGA
1980059	0.00264769	0.000315858	-2.82398	-1.49773	down	RASSF2	9770	Homo sapiens Ras association (RalGDS/AF-6) domain family member 2 (RASSF2), transcript variant 2, mRNA,	chr20	4761060	4761109	GCGCCCCCTTCTTCCAGATGTAATAGAAAGCTCTGCCCTATCACAAGGGG
5670661	6.40159e-05	8.01192e-07	-2.82137	-1.49639	down	MGC71993	440400	Homo sapiens similar to DNA segment, Chr 11, Brigham & Womens Genetics 0434 expressed (MGC71993), mRNA,				GCTCCAGCCCCTCCTCTATTTAAAGACTCCCTGCACCGTGTCACCCAGGT
4640291	0.000245767	8.94015e-06	-2.81832	-1.49483	down	LOC729208	729208	PREDICTED: Homo sapiens misc_RNA (LOC729208), miscRNA,				CACGGCTAAACTGGAAGAGTCTACAATGTTACCCAGCATGCTGTTGACAC
3310228	2.3567e-05	9.77606e-08	-2.81117	-1.49117	down	C11orf67	28971	Homo sapiens chromosome 11 open reading frame 67 (C11orf67), mRNA,	chr11	77209896	77231182	CGCCGTTTGGGAACGCAACTTTGAGGAGACAGTGCGGTGGACTTCAGTGA
1470427	0.000603176	3.68899e-05	-2.80654	-1.48879	down	ALDH4A1	8659	Homo sapiens aldehyde dehydrogenase 4 family, member A1 (ALDH4A1), nuclear gene encoding mitochondrial protein, transcript variant P5CDhS, mRNA,	chr1	19070535	19070584	GTTCTACTGGTTCTACACTGTGAGGTGGCAATGGGATTTGCTCAGATGCC
1510452	2.80635e-05	1.42749e-07	-2.80592	-1.48847	down	C8orf59	401466	Homo sapiens chromosome 8 open reading frame 59 (C8orf59), transcript variant 3, mRNA,	chr8	86316922	86316971	GAACAAATTAAGAGGGCCGAAGTCCAGGAATGTATTTCACATAGCCAGCC
2450255	8.98819e-05	1.57425e-06	-2.80552	-1.48827	down	LOC391532	391532	PREDICTED: Homo sapiens misc_RNA (LOC391532), miscRNA,	chr15	73826687	73826736	CAGACCGTTCCTTCTGTAGCTCAGGACAGCACCCTCCACCCCACTTACTC
6250292	2.95154e-05	1.68252e-07	-2.80137	-1.48613	down	LOC646753	646753	PREDICTED: Homo sapiens similar to ribosomal protein S26 (LOC646753), mRNA,				CATGAAGCCCGCAAGGACCGAACACCCCCACCCCGATTTAGACCTGCTGG
6400332	8.33996e-05	1.38383e-06	-2.79843	-1.48462	down	CNIH4	29097	Homo sapiens cornichon homolog 4 (Drosophila) (CNIH4), mRNA,	chr1	222630188	222630237	GCACAGTTGAGGAGCCAGAGACTTCTTAAATCATCCTTAGAACCGTGACC
2370167	4.41707e-05	3.91515e-07	-2.79737	-1.48407	down	LOC100130154	100130154	PREDICTED: Homo sapiens similar to thymosin, beta 10 (LOC100130154), mRNA,	chr2	236455826	236455875	ATGGCAGACAAACCAGACGTGGGGGGAATCGCCAGCTTCAATAGGGCCAA
830739	3.84295e-05	2.81288e-07	-2.7911	-1.48083	down	RPP21	79897	Homo sapiens ribonuclease P/MRP 21kDa subunit (RPP21), mRNA,	chr6	30314498	30314547	CCACTACAACCCTTGCCAAACACAGCCCACTCCATTTCAGACCGCCTTCC
4290349	1.77464e-05	2.20202e-08	-2.78802	-1.47924	down	LOC643949	643949	PREDICTED: Homo sapiens similar to 60S acidic ribosomal protein P2 (LOC643949), mRNA,				GAGTATTGGCAAGCTTGCCAGTGTACCTGCCGGTGTGGCTGTGGCCATCT
2370093	0.000298774	1.24255e-05	-2.78787	-1.47916	down	COMMD4	54939	Homo sapiens COMM domain containing 4 (COMMD4), mRNA,	chr15	73419420	73419469	TGTGTGGAGCCGCCCTGCCCGTATGGAGTCACGCCCTCTGAACTGCTCTT
2070746	0.00015077	3.90823e-06	-2.77637	-1.4732	down	RBX1	9978	Homo sapiens ring-box 1 (RBX1), mRNA,	chr22	39679580	39690042	CTTTGCATAGAATGTCAAGCTAACCAGGCGTCCGCTACTTCAGAAGAGTG
5310673	0.00015675	4.17485e-06	-2.77533	-1.47266	down	AYP1p1	386608	PREDICTED: Homo sapiens AYP1 pseudogene 1 (AYP1p1), misc RNA,				ACCACTACCAGCTTCAGCCGCTTCACCCTGTGGGGCTTCCTTGGCCCGGA
4780689	2.73387e-05	1.34731e-07	-2.76942	-1.46958	down	MRPL51	51258	Homo sapiens mitochondrial ribosomal protein L51 (MRPL51), nuclear gene encoding mitochondrial protein, mRNA,	chr12	6471831	6471880	GCACCCCAAAGAACTGATCAGGGGGCCCATATGGCTTCGAGGTTGGAAAG
20465	4.48219e-05	4.00971e-07	-2.76619	-1.4679	down	MRPL36	64979	Homo sapiens mitochondrial ribosomal protein L36 (MRPL36), nuclear gene encoding mitochondrial protein, mRNA,	chr5	1851714	1851763	CCGAGGCACAAGCAGAGACAGATGTAGACCCTTTCCCTCCAGAGTCACGC
1050678	6.62354e-05	8.61278e-07	-2.76129	-1.46534	down	LOC100128060	100128060	PREDICTED: Homo sapiens similar to mCG19129, transcript variant 2 (LOC100128060), mRNA,				CAAGATCGTGAAGCCCAATGATGAGAAGCCGGACGAGTTCGAGTCCGGCA
5960224	0.000576537	3.42386e-05	-2.75747	-1.46334	down	PTTG3P	26255	Homo sapiens pituitary tumor-transforming 3 (pseudogene) (PTTG3P), non-coding RNA,	chr8	67842374	67842423	GCTTCGAGAGTTTTGACCTGCCTGAAGAGCACCAGATTGCACATCTCCCC
460379	9.00801e-05	1.60781e-06	-2.75649	-1.46283	down	IFI27L1	122509	Homo sapiens interferon, alpha-inducible protein 27-like 1 (IFI27L1), transcript variant 1, mRNA,	chr14	94568918	94568967	CCACACTGAGGCAGGGAGTTGGCTCTCTTGGTGGAGATGACTTTCCTGGG
1820482	5.0799e-05	5.2411e-07	-2.75468	-1.46188	down	NDUFB10	4716	Homo sapiens NADH dehydrogenase (ubiquinone) 1 beta subcomplex, 10, 22kDa (NDUFB10), mRNA,	chr16	1951843	1951892	CAGAGGCAGAGGATGCTGCAAGAGAGAAAAGCTGCAAAAGAGGCCGCCGC
3870630	0.0001462	3.70809e-06	-2.74502	-1.45682	down	ATP6V1F	9296	Homo sapiens ATPase, H+ transporting, lysosomal 14kDa, V1 subunit F (ATP6V1F), mRNA,	chr7	128292973	128293022	CCTTCCCACTCCATTAAGAGGCTAGGTGAGGCGCTTCTAGGTTGCTGGGG
1510291	0.000127594	2.94047e-06	-2.74323	-1.45588	down	PTTG1	9232	Homo sapiens pituitary tumor-transforming 1 (PTTG1), mRNA,	chr5	159787441	159788218	CTCCACCATGGGAATCCAATCTGTTGCAGTCTCCTTCAAGCATTCTGTCG
6040110	1.77464e-05	2.13816e-08	-2.74016	-1.45426	down	LOC647285	647285	PREDICTED: Homo sapiens misc_RNA (LOC647285), miscRNA,				AGTGCCGAGGCCATGAGTGCACATGCCGAGGCTATCAGGGCCCTTGTGAA
4150615	1.77464e-05	3.0187e-08	-2.73712	-1.45266	down	LOC100132673	100132673	PREDICTED: Homo sapiens misc_RNA (LOC100132673), miscRNA,				GCATCGTCTCAGCCCGTGCCCAAGAAGCTGCTCATGATGGCTGGTATTGA
620433	0.000801656	5.57081e-05	-2.73622	-1.45218	down	C1orf122	127687	Homo sapiens chromosome 1 open reading frame 122 (C1orf122), mRNA,	chr1	38047325	38047374	AGCCCTGACCATCCCCGAGCAGAATACCCTGACTTCTCTCCCTCCCCAGG
3890397	0.000258878	9.66489e-06	-2.73597	-1.45205	down	C14orf112	51241	Homo sapiens chromosome 14 open reading frame 112 (C14orf112), mRNA,	chr14	69862843	69862892	CTGGAAGAATATTCGAGGACCCAGGCCTTGGGAAGATCCTGACCTCCTCC
7210484	1.77464e-05	3.70149e-08	-2.73201	-1.44996	down	C6orf108	10591	Homo sapiens chromosome 6 open reading frame 108 (C6orf108), transcript variant 2, mRNA,	chr6	43301527	43301576	GGAGCAGCAGATGGCTCTCGGTTCCAGGTGTGGGACTATGAGGAGGGAGA
4260368	0.00195036	0.000204268	-2.72153	-1.44442	down	UBE2C	11065	Homo sapiens ubiquitin-conjugating enzyme E2C (UBE2C), transcript variant 3, mRNA,	chr20	43877911	43878755	GATAGTCCCTTGAACACACATGCTGCCGAGCTCTGGAAAAACCCCACAGC
3800079	1.77464e-05	4.24766e-08	-2.71836	-1.44274	down	C19orf56	51398	Homo sapiens chromosome 19 open reading frame 56 (C19orf56), mRNA,	chr19	12639931	12639980	CCCTGCCTGCTGCTGGGGGAGATGCTGTCCATGTTTCTAGGGGTATTCAT
1230600	2.43331e-05	1.08221e-07	-2.71677	-1.44189	down	LOC651064	651064	PREDICTED: Homo sapiens hypothetical protein LOC651064 (LOC651064), mRNA,				GGGAAGGGGCCCTTGGCCACAGGTGGAATTAAGAAATCTGGCGAAAAGCA
610376	1.77464e-05	3.26002e-08	-2.7109	-1.43877	down	NUDCD2	134492	Homo sapiens NudC domain containing 2 (NUDCD2), mRNA,	chr5	162883947	162883996	GCGGATCCTTGGGTGCAAGACCAAATGCAGAGAAAGCTTACATTAGAGAG
3180600	0.000564247	3.31172e-05	-2.71069	-1.43866	down	PNPO	55163	Homo sapiens pyridoxamine 5'-phosphate oxidase (PNPO), mRNA,	chr17	43380480	43380529	TATTCCCAGTCCGTCAGGAATTTTGTAGAAGGGCTTCATGTGCTGGTACC
2510630	7.41981e-05	1.03751e-06	-2.70318	-1.43466	down	LOC727865	727865	PREDICTED: Homo sapiens misc_RNA (LOC727865), miscRNA,				GAGGTCTGTGTATGCTCACTTCCCCCATCAACGTCGTTATCCAGAATGGG
5560682	1.77464e-05	2.95574e-08	-2.70223	-1.43415	down	KRT10	3858	Homo sapiens keratin 10 (epidermolytic hyperkeratosis; keratosis palmaris et plantaris) (KRT10), mRNA,	chr17	36228255	36228608	CTCCTCTTCCGGGTCCGTGGGCGAGTCTTCATCTAAGGGACCAAGATACT
2760537	7.72404e-05	1.13933e-06	-2.70049	-1.43322	down	MTE	644314	Homo sapiens metallothionein E (MTE), mRNA,				CCGTGGGCTGTGCCAAGTGTGCCCAGGGATGTGTTTGCAAAGGGACATCT
6580132	0.000569996	3.35877e-05	-2.69526	-1.43042	down	NDUFA6	4700	Homo sapiens NADH dehydrogenase (ubiquinone) 1 alpha subcomplex, 6, 14kDa (NDUFA6), nuclear gene encoding mitochondrial protein, mRNA,	chr22	42481758	42481807	CTGTCAGGGATCAGGGCAGCACTAACAGGCGCAAAAGTAGAGCTGTCAAG
5810687	0.000100167	2.0172e-06	-2.69064	-1.42795	down	LARP6	55323	Homo sapiens La ribonucleoprotein domain family, member 6 (LARP6), transcript variant 2, mRNA,	chr15	71143944	71143993	CAGCACCCAGCACATAGGACATGTTTGTTGACTGAATGCGTATCTCTATC
7100280	0.000158353	4.25006e-06	-2.68811	-1.42659	down	C11orf48	79081	Homo sapiens chromosome 11 open reading frame 48 (C11orf48), mRNA,	chr11	62430619	62430744	GATCCGGCTTGCCCAGAAAGAGAAGACAGCCATGGAAGTGGAAGCCCCTT
940010	8.38078e-05	1.39655e-06	-2.68682	-1.4259	down	CHCHD10	400916	Homo sapiens coiled-coil-helix-coiled-coil-helix domain containing 10 (CHCHD10), mRNA,	chr22	24108335	24108384	CACCACTCAGAGTGACCTGTCCCTGTGTGAGGGCTTCAGCGAGGCCCTGA
20392	7.2432e-05	9.90226e-07	-2.68191	-1.42326	down	CISD1	55847	Homo sapiens CDGSH iron sulfur domain 1 (CISD1), mRNA,	chr10	59707034	59707083	CATGGAGGATTTGGGAGATAAAGCTGTGTACTGCCGTTGTTGGAGGTCCA
2940022	9.20942e-05	1.67491e-06	-2.67983	-1.42214	down	BLVRA	644	Homo sapiens biliverdin reductase A (BLVRA), mRNA,	chr7	43813173	43813222	CTGAGAAGGAACTGGCTGCTGAAAAGAAACGCATCCTGCACTGCCTGGGG
3850431	9.00801e-05	1.60966e-06	-2.67569	-1.41991	down	RER1	11079	Homo sapiens RER1 retention in endoplasmic reticulum 1 homolog (S, cerevisiae) (RER1), mRNA,	chr1	2324454	2324503	TTTCTCACGGATGGAATTCTAGTCAGCTGCAGGCGGGAAGCCAGGCGGGT
4290102	1.87762e-05	4.99278e-08	-2.67448	-1.41926	down	LOC644563	644563	PREDICTED: Homo sapiens misc_RNA (LOC644563), miscRNA,				GGACAGCTGTGTCTTTGCTGGGGAGTATGAAGACACTCTTGGGACCTGTG
1340400	9.89507e-05	1.91935e-06	-2.67201	-1.41793	down	C6orf129	154467	Homo sapiens chromosome 6 open reading frame 129 (C6orf129), mRNA,	chr6	37558919	37558968	ACGCTCGTCTATGCCTACTGGACCATGTGAGCCTGGCACTTCCCCACAAC
4150309	0.000368205	1.70101e-05	-2.66901	-1.41631	down	ZNHIT1	10467	Homo sapiens zinc finger, HIT type 1 (ZNHIT1), mRNA,	chr7	100653827	100653970	ACCCACCAGGAGACCAGGTGTCTGAAGTGGACTGTGTGAGCCTGGGCATT
3130010	3.82723e-05	2.71387e-07	-2.6684	-1.41597	down	DEF8	54849	Homo sapiens differentially expressed in FDCP 8 homolog (mouse) (DEF8), transcript variant 2, mRNA,	chr16	88551557	88552959	CCAGGAGCTGAAGGACCCCAATGAGGATGAGCCAAACATCCGAGTGCTCC
3890025	0.00534765	0.000857037	-2.66632	-1.41485	down	TMSL3	7117	Homo sapiens thymosin-like 3 (TMSL3), mRNA,	chr4	91978846	91978895	TCTGTCTGGCTGGCAGGGAAGGAAAGAACTTGCATGTTGGTGAAGGAAGA
2680767	8.18118e-05	1.32558e-06	-2.66597	-1.41466	down	MRPS24	64951	Homo sapiens mitochondrial ribosomal protein S24 (MRPS24), nuclear gene encoding mitochondrial protein, mRNA,	chr7	43906431	43906480	GCTGGTTTTAAAGCGCCGGGGTAACCAGTTGGAGATCTGTGCCGTGGTCC
3360093	3.76625e-05	2.63057e-07	-2.66578	-1.41456	down	COMMD1	150684	Homo sapiens copper metabolism (Murr1) domain containing 1 (COMMD1), mRNA,	chr2	62132928	62132977	GGAGTTGGAGTTGTTGAAACCAAGGTGTCCATGATCCCTCCCCACTGACC
2000500	1.77464e-05	2.93827e-08	-2.66367	-1.41342	down	SF3B14	51639	Homo sapiens splicing factor 3B, 14 kDa subunit (SF3B14), mRNA,	chr2	24297061	24299115	TTCATCAGCCCGCCAAGATGGCGATGCAAGCGGCCAAGAGGGCGAACATT
2650564	0.000214226	7.25354e-06	-2.65949	-1.41115	down	RARRES3	5920	Homo sapiens retinoic acid receptor responder (tazarotene induced) 3 (RARRES3), mRNA,	chr11	63070226	63070275	GGCCACGGCGCTTGGAATCCTGGTTGTTGCTGGATGCTCTTTTGCGATTA
2260053	0.00120528	0.000100679	-2.65947	-1.41114	down	LOC128192	128192	PREDICTED: Homo sapiens hypothetical LOC128192 (LOC128192), mRNA,				GTGACTTCACATGCCATAATGGCACTGGTGGCAAGTACACCTGCGGGGAG
6290091	0.000519075	2.91059e-05	-2.65569	-1.40909	down	SNORD104	692227	Homo sapiens small nucleolar RNA, C/D box 104 (SNORD104), small nucleolar RNA,	chr17	62223468	62223517	ACGTGTTAGACTGCTGACGCGGGTGATGCGAACTGGAGTCTGAGCCTGCC
1990047	8.06473e-05	1.25505e-06	-2.65141	-1.40676	down	C9orf119	375757	Homo sapiens chromosome 9 open reading frame 119 (C9orf119), mRNA,	chr9	130090876	130090925	CACTGAGAGCCCAACCAGCACACCTACAGAGTTTCCAGCGAGACAATGCC
1300315	4.76109e-05	4.59144e-07	-2.65084	-1.40645	down	MRPL21	219927	Homo sapiens mitochondrial ribosomal protein L21 (MRPL21), nuclear gene encoding mitochondrial protein, transcript variant 4, mRNA,	chr11	68664129	68665426	CAGACCCAGTTGAGGAGACCAGACACCATGCAGAGGTCGTGAAGAAGGTG
6550291	8.20447e-05	1.33517e-06	-2.64993	-1.40595	down	NHP2	55651	Homo sapiens NHP2 ribonucleoprotein homolog (yeast) (NHP2), transcript variant 2, mRNA,	chr5	177576732	177576781	CATGAGGAGTACCAGGAGGCTTACGATGAGTGCCTGGAGGAGGTGCAGTC
5550768	8.11486e-05	1.27491e-06	-2.64453	-1.40301	down			Homo sapiens cDNA FLJ12874 fis, clone NT2RP2003769	chr14	53960082	53960131	AATGGTGCTGTGTCCGCTGTCCACAGAAAACGCCCTTAAGTAGCCCTACC
2760370	8.50425e-05	1.42315e-06	-2.6444	-1.40294	down	CALR	811	Homo sapiens calreticulin (CALR), mRNA,	chr19	12916027	12916076	CCCTCCAACCTGGGGGGCAGTGGTGTGGAGAAGCCACAGGCCTGAGATTT
5090414	4.23491e-05	3.64547e-07	-2.636	-1.39835	down	MRPL40	64976	Homo sapiens mitochondrial ribosomal protein L40 (MRPL40), nuclear gene encoding mitochondrial protein, mRNA,	chr22	17803280	17803329	TGCTAGAAGCCCAGCAGGAAGCTCTGGAGGAACTGCAACTGGAATCCCCG
5090215	0.000268802	1.04262e-05	-2.6307	-1.39544	down	IFI6	2537	Homo sapiens interferon, alpha-inducible protein 6 (IFI6), transcript variant 3, mRNA,	chr1	27992615	27992664	TGCGCCGACGATGCCCAGAATCCAGAACTTTGTCTATCACTCTCCCCAAC
5390411	3.10914e-05	1.85193e-07	-2.62768	-1.39379	down	PHPT1	29085	Homo sapiens phosphohistidine phosphatase 1 (PHPT1), mRNA,	chr9	138864348	138864397	CGGGCGCATCTCCCACCAGAGTCAGGACAAGAAGATTCACGTGTACGGCT
4560669	0.000115144	2.49435e-06	-2.62376	-1.39164	down	LOC728820	728820	PREDICTED: Homo sapiens misc_RNA (LOC728820), miscRNA,				GATTCTAGGCGCTTCAGGAGCCGCGCCTTAAGGTGCAGACATGGCCAAGT
1230044	0.000306517	1.30084e-05	-2.62225	-1.39081	down	SSBP1	6742	Homo sapiens single-stranded DNA binding protein 1 (SSBP1), mRNA,	chr7	141089933	141090182	GATGTGGCGATCAGGGGATAGTGAAGTTTACCAACTGGGTGATGTCAGTC
6250576	7.57935e-05	1.07248e-06	-2.61815	-1.38855	down	MRPL21	219927	Homo sapiens mitochondrial ribosomal protein L21 (MRPL21), nuclear gene encoding mitochondrial protein, transcript variant 1, mRNA,	chr11	68660909	68664017	GACCTTGCGTGTGGAGAGAGAATTCGACTGGAGAAGGTCCTGCTGGTTGG
5550673	4.59853e-05	4.24613e-07	-2.61559	-1.38714	down	SIVA	10572	Homo sapiens CD27-binding (Siva) protein (SIVA), transcript variant 1, mRNA,	chr14	104293138	104293187	CACGTGGGCAGATGCTGATTGGACCAGACGGCCGCCTGATCAGGAGCCTT
150750	5.94662e-05	7.02083e-07	-2.61558	-1.38713	down	LOC347292	347292	PREDICTED: Homo sapiens similar to ribosomal protein L36 (LOC347292), mRNA,	chr9	110429147	110429196	TTTATCAAGAAAAGGGTGGGGATGCACATCCGCGCCAAGAGGAAGCAGGA
5720300	0.000771263	5.25569e-05	-2.61463	-1.38661	down	G3BP1	10146	Homo sapiens GTPase activating protein (SH3 domain) binding protein 1 (G3BP1), transcript variant 1, mRNA,	chr5	151164793	151164842	GCCCGTAAGAAGGAATGTTACTTTAATATTGGACTTTGCTCATGTGCTCG
5820170	5.94662e-05	7.01033e-07	-2.61381	-1.38615	down	SIVA1	10572	Homo sapiens SIVA1, apoptosis-inducing factor (SIVA1), transcript variant 1, mRNA,	chr14	104293139	104293188	ACGTGGGCAGATGCTGATTGGACCAGACGGCCGCCTGATCAGGAGCCTTG
2970025	8.13525e-05	1.31279e-06	-2.61146	-1.38486	down	SEPW1	6415	Homo sapiens selenoprotein W, 1 (SEPW1), mRNA,	chr19	48287770	48287819	TCTTTGCATACCCCATGTCTTCCCCAGTTGTCCCCTGGAGTTTGGGGGGA
1990491	1.77464e-05	2.13822e-08	-2.60618	-1.38194	down	AK2	204	Homo sapiens adenylate kinase 2 (AK2), transcript variant AK2A, mRNA,	chr1	33478705	33478754	CCATCCCTGTGAGGCAATGGGTGGGAATGATAGGACAGGCAAAGAGAAGC
7210035	0.00107651	8.48462e-05	-2.60064	-1.37887	down	SNORD13	692084	Homo sapiens small nucleolar RNA, C/D box 13 (SNORD13), small nucleolar RNA,	chr8	33371010	33371059	GAGCGTGATGATTGGGTGTTCATACGCTTGTGTGAGATGTGCCACCCTTG
1940180	0.000270273	1.05184e-05	-2.59756	-1.37716	down	PSMB9	5698	Homo sapiens proteasome (prosome, macropain) subunit, beta type, 9 (large multifunctional peptidase 2) (PSMB9), transcript variant 1, mRNA,	chr6	32825066	32825115	ACAAGCTGTCCCCGCTGCACGAGCGCATCTACTGTGCACTCTCTGGTTCA
7330379	2.95154e-05	1.63342e-07	-2.59219	-1.37417	down	PTMS	5763	Homo sapiens parathymosin (PTMS), mRNA,	chr12	6750146	6750195	CCTACCAGCCTCATTCTTCCTCCGGTAGCCTCTCCCACCTAACCTCTGCA
4480128	0.001185	9.83544e-05	-2.58868	-1.37222	down	LOC100134273	100134273	PREDICTED: Homo sapiens similar to mCG7602 (LOC100134273), mRNA,				GCCTCAATATGTGCTGCCAGTGTTTCCATCAGTATGCAGAGGAGGTAGGC
540215	0.00075223	5.08599e-05	-2.58821	-1.37195	down	C6orf173	387103	Homo sapiens chromosome 6 open reading frame 173 (C6orf173), mRNA,	chr6	126709066	126709115	CTGTTTGTTCATCGATTAGCAGAAGAGTCCAGGACAAACGCTTGTGCGAG
4040343	2.12871e-05	7.52134e-08	-2.58667	-1.3711	down	LOC100129673	100129673	PREDICTED: Homo sapiens similar to hCG2042915 (LOC100129673), mRNA,	chr17	4958283	4958332	CCAGATGCCTCACAAGGTCTGAGCTCCATCTGAAGGCTTTCCCATGCTTG
2070564	5.62968e-05	6.46699e-07	-2.5822	-1.3686	down	TOMM6	100188893	Homo sapiens translocase of outer mitochondrial membrane 6 homolog (yeast) (TOMM6), nuclear gene encoding mitochondrial protein, mRNA,	chr6	41757346	41757395	CAGCCTACAATCTGTGACCACCACAAGATGTGCCCTGATGGCAGCTGAAG
5570110	0.000980258	7.44794e-05	-2.57954	-1.36712	down	TRIOBP	11078	Homo sapiens TRIO and F-actin binding protein (TRIOBP), transcript variant 6, mRNA,	chr22	36500261	36500310	TTCCTGCCCTACCTCCTACTAACACTTCCTGCCCCATTTGGACCCGTACC
5420377	6.22076e-05	7.61155e-07	-2.57803	-1.36627	down	LGALS3	3958	Homo sapiens lectin, galactoside-binding, soluble, 3 (galectin 3) (LGALS3), mRNA,	chr14	54681712	54681761	CCTCACCAGTGCTTCATATACCATGATATAATCTGAAAGGGGCAGATTAA
6020468	0.00804208	0.00151746	-2.57721	-1.36581	down	PPP1R14A	94274	Homo sapiens protein phosphatase 1, regulatory (inhibitor) subunit 14A (PPP1R14A), mRNA,	chr19	43433736	43433785	TCTCCCTGCCCCCCGGACGCCGCCCAGCTTGCTTGTGTATAAGTTGTATT
3870470	9.36711e-05	1.73693e-06	-2.57521	-1.36469	down	LOC728973	728973	PREDICTED: Homo sapiens similar to 40S ribosomal protein S7 (S8) (LOC728973), mRNA,	chr1	231491360	231491409	CAAGCAAAATTGTGGGCAAGAGAATCCGCGTGAAACTAGATGGCAGCCGG
2230626	0.000167204	4.73307e-06	-2.57054	-1.36207	down	MRPL33	9553	Homo sapiens mitochondrial ribosomal protein L33 (MRPL33), nuclear gene encoding mitochondrial protein, transcript variant 1, mRNA,	chr2	27850818	27850867	GCGAAGCTGGGACAGGTTTCTGCTTCAACACCAAGAGAAACCGACTGCGG
70368	0.000203695	6.66569e-06	-2.56908	-1.36125	down	C21orf34	388815	Homo sapiens chromosome 21 open reading frame 34 (C21orf34), transcript variant 3, mRNA,	chr21	16901230	16901279	GCCCCAGACTTGTCGCACGGATGCAGAAAACTTAATGGAGGAGGCTGAGG
650605	0.000124828	2.85172e-06	-2.55807	-1.35506	down	LOC388789	388789	PREDICTED: Homo sapiens hypothetical gene supported by AF147354 (LOC388789), mRNA,				GGCGAAGTCGTCAGACCAAAAGGATGGCTCAGCAAGTGAAGTACCCAGTG
3890360	0.000140215	3.46262e-06	-2.55724	-1.35459	down	LOC439953	439953	PREDICTED: Homo sapiens misc_RNA (LOC439953), miscRNA,	chr10	32517183	32517232	TAACCACCAGACCATTCCTTCTGTAGTTCAGGAGAACACCCTTCCACCCC
6900630	0.000759002	5.14523e-05	-2.5541	-1.35282	down	ATP2B4	493	Homo sapiens ATPase, Ca++ transporting, plasma membrane 4 (ATP2B4), transcript variant 2, mRNA,	chr1	201979139	201979188	GCCTCTTCCTCTGAATAGACCAGACGCCCTTTCACTTAGTTCAGTGCCAG
270215	0.000610075	3.742e-05	-2.5512	-1.35118	down	ARSB	411	Homo sapiens arylsulfatase B (ARSB), transcript variant 1, mRNA,	chr5	78108988	78109037	GTGTCAGCCATATGTATGGGGCTTCCATTTGGGGTGATGAGAAAGTTCTG
70167	0.000264765	9.99945e-06	-2.55076	-1.35093	down	LY96	23643	Homo sapiens lymphocyte antigen 96 (LY96), mRNA,	chr8	75103777	75103826	TGGGAGCCCAGAAGAAATGCTCTTTTGCTTGGAGTTTGTCATCCTACACC
4830377	4.92291e-05	4.88314e-07	-2.54617	-1.34833	down	LOC100131787	100131787	PREDICTED: Homo sapiens misc_RNA (LOC100131787), miscRNA,	chr1	171977630	171977679	AGCCTACAGGAGGAAAAGCAAGGCTTACAAGAAGGATGTTCCTTCAGATG
6770343	1.87762e-05	4.86531e-08	-2.54006	-1.34486	down	ETFB	2109	Homo sapiens electron-transfer-flavoprotein, beta polypeptide (ETFB), transcript variant 2, mRNA,	chr19	56540255	56540304	CCAAGCTGAAGGAGATTGGGCGGATTTGAGCCCCTCCCAGAGATGGCAAT
150131	2.80635e-05	1.42592e-07	-2.53647	-1.34282	down	UXT	8409	Homo sapiens ubiquitously-expressed transcript (UXT), transcript variant 2, mRNA,	chrX	47516626	47516675	CGCATCTATGTGGCCCTGGGATATGGTTTTTTCCTGGAGTTGACACTGGC
4040026	0.000776814	5.30529e-05	-2.53507	-1.34203	down	LOC728590	728590	PREDICTED: Homo sapiens similar to rCG23287 (LOC728590), mRNA,				CTTGAAAACCCTTACGGAGAAGACCATCACCCTCGAGGCTGAACCCTTGG
6130259	0.000885268	6.39665e-05	-2.53173	-1.34013	down	LOC402644	402644	PREDICTED: Homo sapiens similar to peptidylprolyl isomerase A isoform 1 (LOC402644), mRNA,				CGTTGCTGTCGACAGTGAGCCCTTGGACCACGTCTCCTTTGAGCTGTTTG
4760450	5.58435e-05	6.37288e-07	-2.53071	-1.33954	down	C16orf33	79622	Homo sapiens chromosome 16 open reading frame 33 (C16orf33), mRNA,	chr16	47174	47223	CTGGTGGCTGAGCTTTTTCCCAGCAGGAATGGGTCCTCGAATCATCGTGC
7510632	2.94283e-05	1.57864e-07	-2.52923	-1.3387	down	TAF10	6881	Homo sapiens TAF10 RNA polymerase II, TATA box binding protein (TBP)-associated factor, 30kDa (TAF10), mRNA,	chr11	6632166	6632215	GGACTTGACCCCTGCCCTCAGCGAGTATGGCATCAATGTGAAGAAGCCGC
2680095	8.06473e-05	1.25489e-06	-2.52744	-1.33767	down	LOC392285	392285	PREDICTED: Homo sapiens misc_RNA (LOC392285), miscRNA,	chr9	7588186	7588235	GCTGAACCCAACACAAACGGTTCCCAGTTTTTTCATCTGCACTGCCAAGA
3310376	0.000383202	1.79611e-05	-2.52647	-1.33713	down	TIMM10	26519	Homo sapiens translocase of inner mitochondrial membrane 10 homolog (yeast) (TIMM10), nuclear gene encoding mitochondrial protein, mRNA,	chr11	57296016	57296065	TCCCGGAGTGGTAGCGCTGTCTCCTGGTGAAGGAGTATTTGTCACACTGG
1470520	0.000269294	1.04548e-05	-2.52547	-1.33655	down	CMTM6	54918	Homo sapiens CKLF-like MARVEL transmembrane domain containing 6 (CMTM6), mRNA,	chr3	32523434	32523483	GGCTACCTCAGGGTCACCACCCATGTATTGGGCTTAGTCAGGATTGACAG
3390477	0.000152841	4.02628e-06	-2.52535	-1.33648	down	C17orf79	55352	Homo sapiens chromosome 17 open reading frame 79 (C17orf79), mRNA,	chr17	27203236	27203285	CGATGCTGAAGATTGAGTGTGGAGCTTTCTGCCTTGTAGGTGGGCGGGCC
650259	0.000676762	4.36458e-05	-2.52313	-1.33521	down	ATP5J	522	Homo sapiens ATP synthase, H+ transporting, mitochondrial F0 complex, subunit F6 (ATP5J), nuclear gene encoding mitochondrial protein, transcript variant 1, mRNA,	chr21	27107170	27107219	GAAGTAGAGCGGAGGTGGTGGCGGCGGAGGCTTTGGCAGCTCGGGACTGA
4760424	1.77464e-05	3.65543e-08	-2.52239	-1.33479	down	EIF3K	27335	Homo sapiens eukaryotic translation initiation factor 3, subunit K (EIF3K), mRNA,	chr19	39123314	39125677	GTCGGACAGCCAGCTAAAGGTGTGGATGAGCAAATACGGCTGGAGTGCCG
1070450	0.000100167	1.99153e-06	-2.51843	-1.33253	down	PTGS1	5742	Homo sapiens prostaglandin-endoperoxide synthase 1 (prostaglandin G/H synthase and cyclooxygenase) (PTGS1), transcript variant 2, mRNA,	chr9	124197604	124197653	GGGTGAGCTGCACCTGATTAGTTGAAAGGCCTCAAGAACAAACACTGCAG
7320722	9.00801e-05	1.58328e-06	-2.51344	-1.32966	down	LOC727984	727984	PREDICTED: Homo sapiens misc_RNA (LOC727984), miscRNA,	chr5	55468914	55468963	TGGGAACAAAGCACCTAAGATGTGCCCCTGGACCTACAGAGCTCATGGTC
4570136	0.000115278	2.50134e-06	-2.51192	-1.32879	down	NHP2	55651	Homo sapiens NHP2 ribonucleoprotein homolog (yeast) (NHP2), transcript variant 2, mRNA,	chr5	177576671	177576720	CCCTATGAGGGGCTCCGGTAGCACCTGGGCACCTGCCGCTGGAAGCTATT
6860687	0.000728744	4.83418e-05	-2.51115	-1.32835	down	PYCARD	29108	Homo sapiens PYD and CARD domain containing (PYCARD), transcript variant 1, mRNA,	chr16	31213061	31213110	ACGTTGAGTGGCTGCTGGATGCTCTGTACGGGAAGGTCCTGACGGATGAG
6650360	4.68907e-05	4.42224e-07	-2.50984	-1.32759	down	LOC648638	648638	PREDICTED: Homo sapiens similar to Peptidyl-prolyl cis-trans isomerase NIMA-interacting 4 (Rotamase Pin4) (PPIase Pin4) (Parvulin 14) (Par14) (Peptidyl-prolyl cis/trans isomerase EPVH) (hPar14) (LOC648638), mRNA,				GACAAGAAGGCTCAAGGTCCCAAAGGTGGTGGCAATGAAGTAAAGGTCAG
990382	4.24756e-05	3.73478e-07	-2.50626	-1.32554	down	C1orf53	388722	Homo sapiens chromosome 1 open reading frame 53 (C1orf53), mRNA,	chr1	196141606	196142906	GCCCACTTGCAAAGAGGTGAATGTTGTGGCTCTGCGTGCAGACATTGTCC
2060612	1.77464e-05	4.1509e-08	-2.50371	-1.32407	down	MRPL27	51264	Homo sapiens mitochondrial ribosomal protein L27 (MRPL27), nuclear gene encoding mitochondrial protein, transcript variant 2, mRNA,	chr17	45800396	45800445	TGTTGAGGCCATCGGACAGAGACTGGAGCCCAGGTGACAGGAGATGGTGA
830403	8.06473e-05	1.25524e-06	-2.50203	-1.3231	down	PSME2	5721	Homo sapiens proteasome (prosome, macropain) activator subunit 2 (PA28 beta) (PSME2), mRNA,	chr14	24613440	24613629	TGATTTTGGGGTAGCAATCCAGGAGAAGGTGCTGGAGAGGGTGAATGCCG
5310471	0.00156756	0.000150003	-2.49755	-1.32051	down	UBE2C	11065	Homo sapiens ubiquitin-conjugating enzyme E2C (UBE2C), transcript variant 6, mRNA,	chr20	43875503	43877941	CCCTCATGAACCCAACATTGATAGTCCCTTGAACACACATGCTGCCGAGC
2760673	3.01237e-05	1.74089e-07	-2.49156	-1.31705	down	NHP2	55651	Homo sapiens NHP2 ribonucleoprotein homolog (yeast) (NHP2), transcript variant 2, mRNA,	chr5	177576733	177576782	CCATGAGGAGTACCAGGAGGCTTACGATGAGTGCCTGGAGGAGGTGCAGT
630735	3.53245e-05	2.35251e-07	-2.48901	-1.31557	down	COX17	10063	Homo sapiens COX17 cytochrome c oxidase assembly homolog (S, cerevisiae) (COX17), nuclear gene encoding mitochondrial protein, mRNA,	chr3	120878850	120878899	GAGGCTGGCATAGATTTGGCTGTCTCCGCTCATAGCTGCTTTTGGCGCGA
6420242	2.77119e-05	1.38535e-07	-2.48849	-1.31527	down	FIS1	51024	Homo sapiens fission 1 (mitochondrial outer membrane) homolog (S, cerevisiae) (FIS1), nuclear gene encoding mitochondrial protein, mRNA,	chr7	100883064	100883113	ACTTGCTGTGTCCAAGTCCAAATCCTGAAGGAGACGCGGGAGCCCACGGA
6480184	0.000173907	5.17802e-06	-2.48741	-1.31464	down	LSMD1	84316	Homo sapiens LSM domain containing 1 (LSMD1), mRNA,	chr17	7760432	7760481	AGCGCGCCCGACAGCAGCTAGAGGCGCTGCTCAACAAGACTATGCGCATT
6370538	0.000504922	2.77479e-05	-2.48683	-1.31431	down	WBSCR22	114049	Homo sapiens Williams Beuren syndrome chromosome region 22 (WBSCR22), mRNA,	chr7	72750132	72750181	AAGCGCAAGCCCCGCTTCTAAGTCACCACGCGGTTCTGGAAAGGCACTTG
5050608	0.000241872	8.61838e-06	-2.48465	-1.31304	down	TIMM23	10431	Homo sapiens translocase of inner mitochondrial membrane 23 homolog (yeast) (TIMM23), nuclear gene encoding mitochondrial protein, mRNA,	chr10	51293293	51293342	GTGGTCTTCGAGGGATAGCACGAGGTGGTCTGACAGGACTAACACTTACC
4890427	4.02294e-05	3.20922e-07	-2.48317	-1.31218	down	MRPL23	6150	Homo sapiens mitochondrial ribosomal protein L23 (MRPL23), nuclear gene encoding mitochondrial protein, mRNA,	chr11	1930623	1934072	ATCAAGAAGCCGGACTACAAGGTCGCCTACGTGCAGCTGGCCCATGGACA
7150280	2.61689e-05	1.23333e-07	-2.48078	-1.31079	down	LOC145853	145853	PREDICTED: Homo sapiens hypothetical LOC145853 (LOC145853), mRNA,	chr15	65600865	65600914	CAACTACCACGTCCTGCGCACCGGCTGCTTCCCCTTCATCAAGTACCACT
6510487	0.000226499	7.7494e-06	-2.47775	-1.30903	down	FAM96B	51647	Homo sapiens family with sequence similarity 96, member B (FAM96B), mRNA,	chr16	65523596	65523645	TTGGAGGTTGTGAATCAGTGCCTGTCAGCCCGCTCCTGAGCCTGGCCTTT
130673	5.52563e-05	6.17115e-07	-2.4754	-1.30766	down	NHP2	55651	Homo sapiens NHP2 ribonucleoprotein homolog (yeast) (NHP2), transcript variant 1, mRNA,	chr5	177577929	177577978	AGGAGACACACTGCCCATTGAGGTATACTGCCATCTCCCAGTCATGTGTG
4560528	4.67153e-05	4.37301e-07	-2.47335	-1.30647	down	POP5	51367	Homo sapiens processing of precursor 5, ribonuclease P/MRP subunit (S, cerevisiae) (POP5), transcript variant 3, mRNA,	chr12	121017088	121017137	GCAGAAGCAATGGAGTGAACCTCTGCTCCCCACACAGCTGGCTACACTGC
780528	0.000325271	1.41847e-05	-2.46679	-1.30264	down	CKS2	1164	Homo sapiens CDC28 protein kinase regulatory subunit 2 (CKS2), mRNA,	chr9	91119989	91121113	CCAACAGAGTCTAGGCTGGGTTCATTACATGATTCATGAGCCAGAACCAC
2450368	8.11486e-05	1.27259e-06	-2.46592	-1.30212	down	GTF2A2	2958	Homo sapiens general transcription factor IIA, 2, 12kDa (GTF2A2), mRNA,	chr15	57721744	57730199	GCAGCACTGGCTCAGAGGGTCAGGAACAGAGTCAATTTCAGGGGCTCTCT
580626	0.000323061	1.40197e-05	-2.45957	-1.29841	down	LOC100129657	100129657	PREDICTED: Homo sapiens hypothetical protein LOC100129657 (LOC100129657), mRNA,				CTTCGTGTTCACTTTAAGAACACTCGTGGAACTGCTCAGGCCACCAAGGG
6020066	0.000856691	6.13246e-05	-2.45927	-1.29823	down	LOC651202	651202	PREDICTED: Homo sapiens similar to large subunit ribosomal protein L36a (LOC651202), mRNA,				CTGTATGCCCAGGGAAAGTGGCGTTATAACAGGAAGCAGAGTGGCTATGG
70634	3.42098e-05	2.18322e-07	-2.45842	-1.29773	down	RABAC1	10567	Homo sapiens Rab acceptor 1 (prenylated) (RABAC1), mRNA,	chr19	47152867	47152916	TGGTGGTCATCGGCTCCCACGCTGCCTTCCACCAGATTGAGGCTGTGGAC
1110575	0.000167204	4.74255e-06	-2.45665	-1.29669	down	NDUFC1	4717	Homo sapiens NADH dehydrogenase (ubiquinone) 1, subcomplex unknown, 1, 6kDa (NDUFC1), mRNA,	chr4	140435704	140436338	GGCCCTTCAGTGCGATCAAAGTTCTACGTGCGAGAGCCGCCGAATGCCAA
10170	5.94662e-05	6.99934e-07	-2.45028	-1.29295	down	GNG5	2787	Homo sapiens guanine nucleotide binding protein (G protein), gamma 5 (GNG5), mRNA,	chr1	84744293	84744342	GCCGCTATGAAGAAAGTGGTTCAACAGCTCCGGCTGGAGGCCGGACTCAA
7610593	1.77464e-05	2.26782e-08	-2.44447	-1.28952	down	TRAPPC5	126003	Homo sapiens trafficking protein particle complex 5 (TRAPPC5), transcript variant 3, mRNA,	chr19	7653447	7653496	ACAAGCTGGAGCAGGCCAACGATGACGCGCGCACCTTCTACATCATCGAG
3990600	0.000118876	2.62578e-06	-2.43807	-1.28574	down	TMEM93	83460	Homo sapiens transmembrane protein 93 (TMEM93), transcript variant 2, mRNA,	chr17	3519550	3519599	AAACCAGATCGGGAGGACTGTGGCCAGCAATTAACACCATGTAGACTTCC
6220242	1.77464e-05	2.6122e-08	-2.43728	-1.28527	down	ETFB	2109	Homo sapiens electron-transfer-flavoprotein, beta polypeptide (ETFB), transcript variant 1, mRNA,	chr19	56561345	56561394	AAGATGGCGGAGCTGCGCGTGCTCGTAGCTGTCAAGAGGGTCATCGACTA
3840446	0.00448588	0.000668247	-2.43632	-1.2847	down	TIMM23	10431	Homo sapiens translocase of inner mitochondrial membrane 23 homolog (yeast) (TIMM23), nuclear gene encoding mitochondrial protein, mRNA,	chr10	51283315	51290376	CTGTGATGAAAATCCTGGATGGCTGACCAAGACTGGCACTTGTTCCAGCC
6100482	0.000396351	1.9013e-05	-2.43477	-1.28378	down	ATP2B4	493	Homo sapiens ATPase, Ca++ transporting, plasma membrane 4 (ATP2B4), transcript variant 1, mRNA,	chr1	201979201	201979250	CCCAACCCTGCTGTTAGGCCTGCTGTTCCCTTTGCTCTTGATTAGGAGAG
7560092	0.000229534	7.9102e-06	-2.4302	-1.28108	down	TMEM126A	84233	Homo sapiens transmembrane protein 126A (TMEM126A), mRNA,	chr11	85042843	85042892	AATGTGACAAAGGCTCGCATAGCTGCTGGCTTACCAATGGCAGGGATACC
3130576	0.000887963	6.43816e-05	-2.42822	-1.2799	down	CHIC2	26511	Homo sapiens cysteine-rich hydrophobic domain 2 (CHIC2), mRNA,	chr4	54876186	54876235	CCAAGTATGTTGTCTTTCCAATGGTGCCTTGCTTGGTGCTCTCCTGGTGG
2570379	8.42018e-05	1.4061e-06	-2.42709	-1.27923	down	LOC100130932	100130932	PREDICTED: Homo sapiens similar to Sm protein G (LOC100130932), mRNA,	chr19	14461147	14461196	GGGAAGCCGTGCGTTCTGTTCCAAGGCATCTGTGAGCCCATGGAGTATAC
6980156	0.00049232	2.65841e-05	-2.42498	-1.27797	down	CIAO1	9391	Homo sapiens cytosolic iron-sulfur protein assembly 1 homolog (S, cerevisiae) (CIAO1), mRNA,	chr2	96303458	96303507	GAGCTCAGGAATTCAAGGTCAGCCTGGGCAACATGGCTAAACTCTGTCTC
6450524	0.0028638	0.000353038	-2.42307	-1.27684	down	LOC653737	653737	PREDICTED: Homo sapiens hypothetical LOC653737 (LOC653737), mRNA,	chr16	9158248	9158756	GGGCCGAAGGAGTTTGCAGCCTTTCGGCCGGAACTGCCATCTTCCAGTAA
4260762	0.000233158	8.1343e-06	-2.42183	-1.2761	down	CHMP2A	27243	Homo sapiens chromatin modifying protein 2A (CHMP2A), transcript variant 1, mRNA,	chr19	63754899	63754948	CCTCAACTGGGGGCTCGCTTAGTGTGGCTGCTGGTGGGAAAAAAGCAGAG
6480494	1.87762e-05	4.97754e-08	-2.41105	-1.26966	down	MGMT	4255	Homo sapiens O-6-methylguanine-DNA methyltransferase (MGMT), mRNA,	chr10	131455239	131455288	GCTGGCCGAAACTGAGTATGTGCAGTAGGATGGATGTTTGAGCGACACAC
4590615	0.000451694	2.32853e-05	-2.40979	-1.26891	down	C7orf59	389541	Homo sapiens chromosome 7 open reading frame 59 (C7orf59), mRNA,	chr7	99589478	99589527	TGTGGTGAAGAGGCAGAACCGAGGTCGGGAGCCCATTGATGTCTGAGCCT
5890368	0.000432246	2.17368e-05	-2.40513	-1.26612	down	LOC653377	653377	PREDICTED: Homo sapiens similar to family with sequence similarity 36, member A (LOC653377), mRNA,	chr10	70062306	70062355	CATGTGATGTTGGAGTAGGGGGGTTTATCTTGGTGACTTTGGGATGCTGG
1470632	7.58408e-05	1.08901e-06	-2.40366	-1.26523	down	UROS	7390	Homo sapiens uroporphyrinogen III synthase (congenital erythropoietic porphyria) (UROS), mRNA,	chr10	127467199	127467248	GTGCACGTGACTGCCCTCTGTGGAAGCCAGCTTAAACCCTAGCCCTGTGA
4200110	5.58435e-05	6.32935e-07	-2.40315	-1.26493	down	GTF3C6	112495	Homo sapiens general transcription factor IIIC, polypeptide 6, alpha 35kDa (GTF3C6), mRNA,	chr6	111386701	111387095	CGGAGAAGACGAGGAAGAGGAGGAGCAGTTGGTTCTGGTGGAATTATCAG
3940736	0.000564247	3.31269e-05	-2.4031	-1.26489	down	NME2	4831	Homo sapiens non-metastatic cells 2, protein (NM23B) expressed in (NME2), transcript variant 3, mRNA,	chr17	46599126	46599175	GGCCTCCGCGGGCCCCGCCAGAGCCTGCGCCCGGGCCCTGACCGCACCTC
2640358	0.000348464	1.57522e-05	-2.40251	-1.26454	down	LOC730288	730288	PREDICTED: Homo sapiens similar to 40S ribosomal protein S28 (LOC730288), mRNA,	chr7	70740334	70740383	TCCAGCATCCGCAGTGTAAAAGGCCCCGTGTGTGAGGGGGACGTGCTCAC
2690400	9.94733e-05	1.94975e-06	-2.39881	-1.26232	down	MRPS17	51373	Homo sapiens mitochondrial ribosomal protein S17 (MRPS17), nuclear gene encoding mitochondrial protein, mRNA,	chr7	55990287	55990336	CCTGGAGAGTCCGTTGAGTTCGGAAACCACCCAGCTAAGCAAAAATCTGG
1010068	0.00105619	8.26456e-05	-2.39777	-1.26169	down	FKBP2	2286	Homo sapiens FK506 binding protein 2, 13kDa (FKBP2), transcript variant 1, mRNA,	chr11	63766596	63767285	TGCACTACACGGGGAAGCTGGAAGATGGGACAGAGTTTGACAGCAGCCTG
4780040	0.000313011	1.34393e-05	-2.3976	-1.26159	down	MRPL41	64975	Homo sapiens mitochondrial ribosomal protein L41 (MRPL41), nuclear gene encoding mitochondrial protein, mRNA,	chr9	139566475	139566524	ATCGGCTTCCTCACCTCGGGCTGGAGGTTCGTGCAGATCAAGGAGATGGT
3780544	0.00172962	0.000172256	-2.39374	-1.25927	down	SF3B14	51639	Homo sapiens splicing factor 3B, 14 kDa subunit (SF3B14), mRNA,	chr2	24291279	24291328	GGGGAACACACCTGAAACTAGAGGAACAGCTTATGTGGTCTATGAGGACA
1580427	2.12871e-05	7.7737e-08	-2.39048	-1.2573	down	THEM2	55856	Homo sapiens thioesterase superfamily member 2 (THEM2), mRNA,	chr6	24806143	24806192	AGAAGAGCATACCAATGCAATAGGCACTCTCCACGGCGGTTTGACAGCCA
540280	0.000545706	3.13048e-05	-2.38988	-1.25694	down	LOC644790	644790	PREDICTED: Homo sapiens hypothetical LOC644790 (LOC644790), mRNA,	chr1	45018858	45018907	CGCCAGGTGCTTCTTAGGCCATGCTCCAAAGTCATCGTCCAGTTTCTCAC
1300369	0.000162545	4.44304e-06	-2.38219	-1.25229	down	LOC255783	255783	Homo sapiens hypothetical protein LOC255783 (LOC255783), non-coding RNA,	chr19	52470716	52470765	ACAGAGCCCACAGCCCATCTGCCTCTTCACCTCCCTGAATCCGTGTCCAT
430196	0.000107513	2.25002e-06	-2.38014	-1.25104	down	MRPL14	64928	Homo sapiens mitochondrial ribosomal protein L14 (MRPL14), nuclear gene encoding mitochondrial protein, mRNA,	chr6	44189535	44189584	GCTGGCCATTGCTCAGAACTTTGTGTGAGTTGAGCCCAGGCCTCTGGTTG
580358	7.57935e-05	1.08027e-06	-2.37876	-1.25021	down	FABP5L2	729163	PREDICTED: Homo sapiens fatty acid binding protein 5-like 2 (FABP5L2), mRNA,				CACAGACTGTCTGCAACTTTACAGATGGTGCATTGGTTCAGCATCAGGAG
2650524	0.000122126	2.73651e-06	-2.37817	-1.24985	down	RPL34	6164	Homo sapiens ribosomal protein L34 (RPL34), transcript variant 2, mRNA,	chr4	109541818	109541867	AGCTGAGGAAGCCTAGAGCTCTCAGAAGCAGTCCTTTGAGCTGGTGTAGG
4860563	0.000534986	3.04265e-05	-2.3779	-1.24969	down	NDUFAB1	4706	Homo sapiens NADH dehydrogenase (ubiquinone) 1, alpha/beta subcomplex, 1, 8kDa (NDUFAB1), mRNA,	chr16	23592435	23592484	CTTTGCTGAGAGAGGACTCAGATGATAGTGACGAATGTCTGGCAGTGAGG
1050187	0.000236991	8.31e-06	-2.37568	-1.24834	down	MRPL11	65003	Homo sapiens mitochondrial ribosomal protein L11 (MRPL11), nuclear gene encoding mitochondrial protein, transcript variant 2, mRNA,	chr11	65959975	65960024	AAGGAGGTAGTTGCAAAAGCTGTGCCCAAGGGGAGGAAGGAGGTCACACC
4540349	6.22076e-05	7.63121e-07	-2.37374	-1.24716	down	LSM2	57819	Homo sapiens LSM2 homolog, U6 small nuclear RNA associated (S, cerevisiae) (LSM2), mRNA,	chr6	31873174	31873223	CCAGGGCAGCATGTGATTCATTTGGGGATGGAAGGAATCTGTCCCGCATC
4560717	1.47165e-05	1.06153e-08	-2.37008	-1.24494	down	MDK	4192	Homo sapiens midkine (neurite growth-promoting factor 2) (MDK), transcript variant 1, mRNA,	chr11	46361611	46361660	AAAGGACTAGACGCCAAGCCTGGATGCCAAGGAGCCCCTGGTGTCACATG
5550612	4.85687e-05	4.76991e-07	-2.36877	-1.24414	down	BRP44	25874	Homo sapiens brain protein 44 (BRP44), transcript variant 2, mRNA,	chr1	167889232	167889281	GAGTCTGTTTGCTGTTAATTTCTTTGTGGGGGCAGCAGGAGCCTCTCAGC
3440168	7.62711e-05	1.10601e-06	-2.36865	-1.24406	down	CHCHD9	645345	PREDICTED: Homo sapiens coiled-coil-helix-coiled-coil-helix domain containing 9 (CHCHD9), mRNA,	chr9	81196367	81196416	AGCAGCAGCCTTGCTTCTATGGGATCAAACAGTTTCTGGAGTGTGCCCAG
1580021	4.63139e-05	4.31858e-07	-2.36633	-1.24265	down	TCTEX1D2	255758	Homo sapiens Tctex1 domain containing 2 (TCTEX1D2), mRNA,	chr3	197527474	197529331	TTCTGCGGCCTGTTTTCCAGCAGAGGTTCAGGCCCTCTGTGGTTAAAGAC
1570370	0.000198857	6.32974e-06	-2.36626	-1.24261	down	HINT2	84681	Homo sapiens histidine triad nucleotide binding protein 2 (HINT2), mRNA,	chr9	35813139	35813308	CAAGCAGACAGCAAAGGCTGAGGGCCTGGGAGATGGATACCGACTTGTGA
3520168	0.00645381	0.00111205	-2.36505	-1.24187	down			AGENCOURT_10229596 NIH_MGC_141 Homo sapiens cDNA clone IMAGE:6563923 5, mRNA sequence	chr19	53113558	53118850	TTCCAGGGCACGAGTTCGAGGCCAGCCTGGTCCACATGGGTCGGaaaaaa
7610747	2.12871e-05	6.96013e-08	-2.36454	-1.24156	down	MRPL24	79590	Homo sapiens mitochondrial ribosomal protein L24 (MRPL24), nuclear gene encoding mitochondrial protein, transcript variant 1, mRNA,	chr1	154973926	154974086	TGGCATCGTCCCTGAAACGTGGATTGATGGCCCCAAAGACACATCAGTGG
6450523	3.39813e-05	2.15659e-07	-2.3627	-1.24043	down	FKBP3	2287	Homo sapiens FK506 binding protein 3, 25kDa (FKBP3), mRNA,	chr14	44656989	44657038	GCTCGACTGGAGATTGAACCAGAATGGGCTTACGGAAAGAAAGGACAGCC
2340092	0.00026508	1.00523e-05	-2.3624	-1.24025	down	TCEB1	6921	Homo sapiens transcription elongation factor B (SIII), polypeptide 1 (15kDa, elongin C) (TCEB1), mRNA,	chr8	75021590	75030729	GGCACGATAAAAGCCATGTTGAGTGGCCCAGGTCAGTTTGCTGAGAACGA
4670424	2.12871e-05	6.97554e-08	-2.3618	-1.23989	down	MRPL11	65003	Homo sapiens mitochondrial ribosomal protein L11 (MRPL11), nuclear gene encoding mitochondrial protein, transcript variant 1, mRNA,	chr11	65961198	65961247	CAGGATGAGGCATTTGCCCTGCAGGATGTACCCCTGTCGTCTGTTGTCCG
7040692	1.95035e-05	5.53193e-08	-2.35879	-1.23804	down	LOC100133390	100133390	PREDICTED: Homo sapiens hypothetical protein LOC100133390, transcript variant 2 (LOC100133390), mRNA,	chr6	32222067	32222568	CTCAGCCATGAACAACGCGGAGTTCTTTAATACCCGCGTCTGGCTCCGCA
2140176	5.53942e-05	6.23801e-07	-2.35377	-1.23498	down	THYN1	29087	Homo sapiens thymocyte nuclear protein 1 (THYN1), transcript variant 3, mRNA,	chr11	134119131	134119745	GCCAGGCATCGCAGGACTCATGAAGATCGTGAAAGAGGCTTACCCAGACC
5670315	9.30254e-05	1.72165e-06	-2.35125	-1.23342	down	LSM7	51690	Homo sapiens LSM7 homolog, U6 small nuclear RNA associated (S, cerevisiae) (LSM7), mRNA,	chr19	2272794	2275145	CGGCACCATTGAGTACATGCGAGACCCTGACGACCAGTACAAGCTCACGG
2320079	0.000231512	8.04814e-06	-2.34854	-1.23177	down	NME4	4833	Homo sapiens non-metastatic cells 4, protein expressed in (NME4), nuclear gene encoding mitochondrial protein, mRNA,	chr16	390478	390527	AGAGGAGTTTGAGCCACCAACTTCAGTGCCTTTCTGTACCCCAAGCCAGC
7550750	0.000512376	2.84539e-05	-2.34824	-1.23158	down	LOC388556	388556	PREDICTED: Homo sapiens misc_RNA (LOC388556), miscRNA,				CAGTGAACGGGTCCTGCACTCAGGCGCAGACGGGGAAGCGGAGCCAACAT
4590494	0.000575671	3.41463e-05	-2.34722	-1.23096	down	YIF1A	10897	Homo sapiens Yip1 interacting factor homolog A (S, cerevisiae) (YIF1A), mRNA,	chr11	65808683	65808732	CTTCCAGCCCCTCATCATATACTGGCTGACTTTCCACCTGGTCCGGTGAC
7570630	0.00073631	4.90705e-05	-2.34491	-1.22954	down	PEG10	23089	Homo sapiens paternally expressed 10 (PEG10), transcript variant 1, mRNA, XM_940378	chr7	94136574	94136623	CGGAGGGAACTGCAGGGAGACCAACTTATTTAGAGCGAATTGGACATGGA
2630102	0.000419402	2.07754e-05	-2.33976	-1.22636	down	CCDC28B	79140	Homo sapiens coiled-coil domain containing 28B (CCDC28B), mRNA,	chr1	32443434	32443483	TAGGCGTCCCACGCAGGCCCACACTGCCCCTCTCATTCTCTTCAAACTGT
3310241	0.000585155	3.51412e-05	-2.33855	-1.22561	down	LOC100131971	100131971	PREDICTED: Homo sapiens similar to 40S ribosomal protein S26 (LOC100131971), mRNA,				ATGGTCGTGCTAAAAAGGGCCGTGGCCACATGCAGCCTATTCGCTGCAGG
5550113	0.000159688	4.3029e-06	-2.33828	-1.22545	down	LOC729340	729340	PREDICTED: Homo sapiens misc_RNA (LOC729340), miscRNA,				GAGCACATCCAAGTGAACAAAACACCTAAGATGCGCCGCCGGACCCACAG
1470184	6.75084e-05	8.95165e-07	-2.33659	-1.2244	down	CLSTN1	22883	Homo sapiens calsyntenin 1 (CLSTN1), transcript variant 1, mRNA,	chr1	9790099	9790148	GACCCTGACTGCTAGTTCTGAGGACACTGGTGGCTGTGCTATGTGTGGCC
940653	0.00113428	9.21342e-05	-2.33553	-1.22375	down	LOC388076	388076	PREDICTED: Homo sapiens hypothetical LOC388076 (LOC388076), mRNA,				GAGGGCAAAGAGTTGGAGTTCTATCTTAGGAAAATCAAGGCCCGGAAGGG
3190671	8.12011e-05	1.29583e-06	-2.33399	-1.2228	down	ATP5D	513	Homo sapiens ATP synthase, H+ transporting, mitochondrial F1 complex, delta subunit (ATP5D), nuclear gene encoding mitochondrial protein, transcript variant 1, mRNA,	chr19	1195098	1195147	AGCAGCGGTTCCATCGCAGTGAACGCCGACTCTTCGGTGCAGTTGTTGGC
3710400	0.00930316	0.0018481	-2.32725	-1.21863	down	AHNAK	79026	Homo sapiens AHNAK nucleoprotein (AHNAK), transcript variant 2, mRNA,	chr11	62201211	62201260	GCCAAGGGCAACAAACACCTGCAGTTAAAGGAATACCTTCCGCGAGGCGG
3120707	0.000515974	2.88675e-05	-2.32461	-1.21699	down	CUTA	51596	Homo sapiens cutA divalent cation tolerance homolog (E, coli) (CUTA), transcript variant 5, mRNA,	chr6	33493237	33493286	CTGCAGCCTTTGTTACTTGCCCCAACGAGAAGGTCGCCAAGGAGATCGCC
5130241	5.34391e-05	5.81591e-07	-2.31689	-1.21219	down	PPIH	10465	Homo sapiens peptidylprolyl isomerase H (cyclophilin H) (PPIH), mRNA,	chr1	42905641	42905690	GCTACCTGTGGTGATCTCGCAGTGTGGGGAGATGTAGTCCAGACAAAGAC
10546	9.20942e-05	1.67981e-06	-2.3162	-1.21176	down	RPS24	6229	Homo sapiens ribosomal protein S24 (RPS24), transcript variant 2, mRNA,	chr10	79463610	79463659	GCCGGCGAATCGTGGTTCTCTTTTCCTCCTTGGCTGTCTGAAGATAGATC
6380220	0.00013623	3.25059e-06	-2.31298	-1.20975	down	Magmas	51025	Homo sapiens mitochondria-associated protein involved in granulocyte-macrophage colony-stimulating factor signal transduction (Magmas), nuclear gene encoding mitochondrial protein, mRNA,	chr16	4390374	4390937	TTCTACCTGCAGTCAAAGGTGGTCCGCGCAAAGGAGCGCCTGGATGAGGA
5490341	0.0176184	0.00442942	-2.3129	-1.2097	down	CLEC2D	29121	Homo sapiens C-type lectin domain family 2, member D (CLEC2D), transcript variant 1, mRNA,	chr12	9739126	9739175	CTTGAGACAAGAACAGTATGGGGCTCCCTGGTGTGATTCCGTCCTGCGCG
3120079	0.00125154	0.000106318	-2.31118	-1.20863	down	SDF2L1	23753	Homo sapiens stromal cell-derived factor 2-like 1 (SDF2L1), mRNA,	chr22	20328510	20328559	GCAGGGCCACTCTTGGCAGAGACTTTGGGTTTGTAGGGGTCCTCAAGTGC
290180	0.00308901	0.000393833	-2.31014	-1.20798	down	LOC647030	647030	PREDICTED: Homo sapiens misc_RNA (LOC647030), miscRNA,				CGGCCTGCCAGGAGTGAAGAAAGCTTTGAGCAAGTATGGTCCTGCCGATG
3360471	5.29815e-05	5.72925e-07	-2.30686	-1.20593	down	EDF1	8721	Homo sapiens endothelial differentiation-related factor 1 (EDF1), transcript variant alpha, mRNA,	chr9	139756745	139756794	CTCAAGCTCCGGGGAAAGGACATTGGAAAGCCCATCGAGAAGGGGCCTAG
6130332	0.000383423	1.8053e-05	-2.29859	-1.20075	down	UCRC	29796	Homo sapiens ubiquinol-cytochrome c reductase complex (7,2 kD) (UCRC), transcript variant 2, mRNA,	chr22	28493546	28493595	CTGTGCCATCCCTGACCTTGGACCCGCCTGAGGGGTGACAGTGGAGTAGA
3390468	2.43331e-05	1.08703e-07	-2.29728	-1.19993	down	MRPL22	29093	Homo sapiens mitochondrial ribosomal protein L22 (MRPL22), nuclear gene encoding mitochondrial protein, transcript variant 1, mRNA,	chr5	154310642	154310691	ATAAAATTGTTTATCCTCCACAACTGCCTGGAGAACCTCGGAGACCAGCA
380541	0.000245877	8.9541e-06	-2.29713	-1.19983	down	PPPDE2	27351	Homo sapiens PPPDE peptidase domain containing 2 (PPPDE2), mRNA,	chr22	41999281	41999330	GGCACAGTTCCTGACTGGGCGGAAGATTCCTTCTTACATCACAGACCTGC
7040184	3.04737e-05	1.77192e-07	-2.2939	-1.1978	down	CCDC34	91057	Homo sapiens coiled-coil domain containing 34 (CCDC34), transcript variant 1, mRNA,	chr11	27378993	27379042	GCGCTTACCAGAAAGCCGCCTGACACCATGGGAGGTGTGGTTTATTGGCA
1690630	0.00246705	0.000285673	-2.29216	-1.19671	down	FAM43A	131583	Homo sapiens family with sequence similarity 43, member A (FAM43A), mRNA,	chr3	194409702	194409751	GTAGCACTGTTCTGGTTCTGTTTGCACGCCAGTGGGGAGAGAATAAAGAG
1010246	0.000162545	4.43039e-06	-2.28957	-1.19508	down	IFI6	2537	Homo sapiens interferon, alpha-inducible protein 6 (IFI6), transcript variant 2, mRNA,	chr1	27994780	27994829	AACTCGGTGGCTGCCTCGCTGATGAGCTGGTCTGCGATCCTGAATGGGGG
6840477	0.0248628	0.00701676	-2.28877	-1.19457	down			AGENCOURT_14535501 NIH_MGC_191 Homo sapiens cDNA clone IMAGE:30415823 5, mRNA sequence	chr5	140085938	140085987	AGCTCAGCGGTTACTTCGCGTGTCATCAAACCACCTCTCTGGGTTGTTCG
130603	3.94884e-05	3.04852e-07	-2.28822	-1.19422	down	DYNLRB1	83658	Homo sapiens dynein, light chain, roadblock-type 1 (DYNLRB1), mRNA,	chr20	32592172	32592221	CATGGCAGTCGCTTGGAACCCACTCACACCAATCCAGTGACCGTGTGTGG
4760564	2.12871e-05	7.45617e-08	-2.28465	-1.19197	down	SS18L2	51188	Homo sapiens synovial sarcoma translocation gene on chromosome 18-like 2 (SS18L2), mRNA,	chr3	42611400	42611449	ACTGTGTGCTCCTTCCTATCAGTTTGTAAATGTGGTCCCCCTGACTGCTG
2710646	1.77464e-05	4.34144e-08	-2.28373	-1.19139	down	MSRB2	22921	Homo sapiens methionine sulfoxide reductase B2 (MSRB2), mRNA,	chr10	23449812	23449861	TTCCCTTGCCACCCCTTCACGTGCACCCTCAATTTCCACAATTCACTTGA
3990619	0.0017498	0.000174825	-2.28111	-1.18974	down	TOP2A	7153	Homo sapiens topoisomerase (DNA) II alpha 170kDa (TOP2A), mRNA,	chr17	38545066	38545115	TTTCAGCTCTTGACCTGTCCCCTCTGGCTGCCTCTGAGTCTGAATCTCCC
2100470	0.000491482	2.6504e-05	-2.27879	-1.18827	down	TIMM17B	10245	Homo sapiens translocase of inner mitochondrial membrane 17 homolog B (yeast) (TIMM17B), nuclear gene encoding mitochondrial protein, mRNA,	chrX	48635738	48635787	GTCCCCTTTTTCTCTCTCAGGGCACCCCAGCCCCACACTCACATGTACGA
5690328	3.01237e-05	1.73658e-07	-2.27856	-1.18812	down	MRPS33	51650	Homo sapiens mitochondrial ribosomal protein S33 (MRPS33), nuclear gene encoding mitochondrial protein, transcript variant 1, mRNA,	chr7	140352804	140356736	CACACTTACGCTGAACTCATGCAGACGCTCCGATTTCTTGGACTCTACAG
4230243	5.52563e-05	6.16168e-07	-2.27708	-1.18718	down	NHP2L1	4809	Homo sapiens NHP2 non-histone chromosome protein 2-like 1 (S, cerevisiae) (NHP2L1), transcript variant 2, mRNA,	chr22	42084818	42084867	TGCACGCGAGTGCTTCTGAAACGTCAGCTGCGCTCCCCTAGGAGTGCTGA
6420603	0.000143172	3.60912e-06	-2.27359	-1.18497	down	LOC730255	730255	PREDICTED: Homo sapiens misc_RNA (LOC730255), miscRNA,				GTTGGGCATATCAAAGTGAACAAAGCACCTAAGATGCGCCGCTGGACCTG
6960735	0.000173907	5.17126e-06	-2.27286	-1.18451	down	UQCRH	7388	Homo sapiens ubiquinol-cytochrome c reductase hinge protein (UQCRH), mRNA,	chr1	46554941	46554990	GTAACTGTAAGTTCACATCAACCTCATGGGTTTGGCTTGAGGCTGGTAGC
5080164	0.000276276	1.09609e-05	-2.2722	-1.18409	down	GEMIN6	79833	Homo sapiens gem (nuclear organelle) associated protein 6 (GEMIN6), mRNA,	chr2	38862393	38862442	AGGGAGACGCTCCAAGGACTCTCTGTGTGGCTGGGGTCCTGACTATAGAC
6580131	4.03979e-05	3.27026e-07	-2.26512	-1.17959	down	MRPL22	29093	Homo sapiens mitochondrial ribosomal protein L22 (MRPL22), nuclear gene encoding mitochondrial protein, transcript variant 2, mRNA,	chr5	154326621	154326670	CGCAGCCGGACCATCGTTCACACTCTATGATGAGGAGATTCAGACTCCAC
160612	6.19575e-05	7.5566e-07	-2.26504	-1.17953	down	MGLL	11343	Homo sapiens monoglyceride lipase (MGLL), transcript variant 1, mRNA,	chr3	129023857	129023906	GCCTGGTTCTGATTCTCCAGGCTGTCGTGGTTGTGGAATGCAAACGCCAG
3180731	0.000183369	5.70162e-06	-2.26302	-1.17825	down	MGST1	4257	Homo sapiens microsomal glutathione S-transferase 1 (MGST1), transcript variant 1b, mRNA,	chr12	16391846	16391895	AGTCCCTGCATTGCGCGCGACCCGGCGGCGGGACAGGCTTGCTGCTTCCT
1230348	0.000165488	4.61757e-06	-2.25743	-1.17468	down	CARHSP1	23589	Homo sapiens calcium regulated heat stable protein 1, 24kDa (CARHSP1), transcript variant 2, mRNA,	chr16	8948804	8948853	GGGGTGTTCCCGGCCATCAGCACAGCCTATGACCATTGCAACAACCTCTC
1470332	0.000306585	1.30221e-05	-2.25692	-1.17435	down	FXYD5	53827	Homo sapiens FXYD domain containing ion transport regulator 5 (FXYD5), transcript variant 1, mRNA,	chr19	40352457	40352506	TGGCCAGAGAGGGAAGACACAGATGATGAAGCTGGAGCCAGGGCTGCCGG
4900114	0.00110994	8.87791e-05	-2.2545	-1.17281	down	MORN2	378464	Homo sapiens MORN repeat containing 2 (MORN2), mRNA,	chr2	38956694	38956743	AGAGCTGGCCGCCCAGGGGGAGTCGCAGAGTTTGGAAGATCTCTCTAACA
5340279	0.00513395	0.000807999	-2.2544	-1.17274	down	LOC100133565	100133565	PREDICTED: Homo sapiens similar to hCG23738 (LOC100133565), mRNA,				ATGCTAACTAGTTACGCGACCCCCGAGCGGGTCTGCGCCTGCCACCTGTG
3710039	7.31346e-05	1.01644e-06	-2.25223	-1.17135	down	MRPL54	116541	Homo sapiens mitochondrial ribosomal protein L54 (MRPL54), nuclear gene encoding mitochondrial protein, mRNA,	chr19	3716282	3718260	GGAAGGGCAGGATGTACCCCTGAAACCGGATGCTGAGTACCCTGAATGGC
610451	2.43331e-05	1.08494e-07	-2.25103	-1.17059	down	HIST2H2AA3	8337	Homo sapiens histone cluster 2, H2aa3 (HIST2H2AA3), mRNA,	chr1	149814268	149814317	CGACTTTCCCGATCGCCAGGCAGGAGTTTCTCTCGGTGACTACTATCGCT
5810630	0.000181036	5.55209e-06	-2.24901	-1.16929	down	PIGP	51227	Homo sapiens phosphatidylinositol glycan anchor biosynthesis, class P (PIGP), transcript variant 2, mRNA,	chr21	38439573	38439622	GCTCTTGTTTGGGATTAACATGATGAGTACCTCTCCACTCGACTCCATCC
620615	6.9951e-05	9.42435e-07	-2.24887	-1.1692	down	NDUFA7	4701	Homo sapiens NADH dehydrogenase (ubiquinone) 1 alpha subcomplex, 7, 14,5kDa (NDUFA7), mRNA,	chr19	8376427	8376476	CTGCTGTAGCTGCCACTGAGAAGAAGGCGGTGACTCCAGCTCCTCCCATA
1850468	4.58666e-05	4.19557e-07	-2.24786	-1.16855	down	CCDC56	28958	Homo sapiens coiled-coil domain containing 56 (CCDC56), mRNA,	chr17	40949725	40949774	CCCCTTCACCTTCCAGGGACGCAGTTGTTACGAGGTTAGACGTGGCAGCT
4590403	8.87545e-05	1.54191e-06	-2.2468	-1.16787	down	PPDPF	79144	Homo sapiens pancreatic progenitor cell differentiation and proliferation factor homolog (zebrafish) (PPDPF), mRNA,	chr20	61623504	61623553	TCTTTTTCGGGAAGTCCACCCTCCCGTTCATGGCCACGGTGTTGGAGTCC
10220	1.77464e-05	2.126e-08	-2.24481	-1.16659	down	ANAPC11	51529	Homo sapiens anaphase promoting complex subunit 11 (ANAPC11), transcript variant 4, mRNA,	chr17	77451428	77451477	AGGCCTCTGGGTGCCTGTGTTCTCGGCATATAGATGTGGTCTCGGTGTGT
3290025	8.25392e-05	1.352e-06	-2.2443	-1.16626	down	LOC730074	730074	PREDICTED: Homo sapiens hypothetical LOC730074 (LOC730074), mRNA,	chr6	158670	158719	ATGGGCAGATTGCTGACTGAACCAGTGCACTGGATAGCATTCAGCCTCAT
5420474	0.000114093	2.45135e-06	-2.23951	-1.16319	down	HSPBL2	653553	Homo sapiens heat shock 27kDa protein-like 2 pseudogene (HSPBL2), non-coding RNA,	chr9	74622954	74623003	TTCACGCGGAAATACACGCTGCCCCACCGGTGTGGACCCCACTCAGGTCT
4900328	1.46335e-05	4.66816e-09	-2.23637	-1.16116	down	LOC728324	728324	PREDICTED: Homo sapiens misc_RNA (LOC728324), miscRNA,				GGCCAGTACCAGTCGTTCAGCCACCAGCAGCGGCACCCCCATCTGTAGTT
360475	0.000649153	4.10597e-05	-2.23507	-1.16032	down	PLAUR	5329	Homo sapiens plasminogen activator, urokinase receptor (PLAUR), transcript variant 2, mRNA,	chr19	48842368	48842417	TCAGCCATCTCAGCCCAGGCACCAGACAAGTGGGTGAAGAAGCCACCTTG
7150762	0.00976013	0.00197071	-2.23223	-1.15849	down	PTGIS	5740	Homo sapiens prostaglandin I2 (prostacyclin) synthase (PTGIS), mRNA,	chr20	48120702	48120751	CTTAAGGCCACACTGGCATCTCCCTGACCTTCTCCAGGGACAGAAGCAGG
610400	3.42249e-05	2.19632e-07	-2.23118	-1.15781	down	C11orf1	64776	Homo sapiens chromosome 11 open reading frame 1 (C11orf1), mRNA,	chr11	111259711	111259760	AGCGAGAGCCTCACTGGTTCCCAGGACATCAACCTGAACTGGATCCTCCC
6270382	6.42191e-05	8.09426e-07	-2.22972	-1.15687	down	DYRK4	8798	Homo sapiens dual-specificity tyrosine-(Y)-phosphorylation regulated kinase 4 (DYRK4), mRNA,	chr12	4593099	4593148	GGCGGAGGTGTCCATGACCTCCCCAGGACAGAGCAAAAACTTCTCCCTCA
520577	0.00144593	0.00013293	-2.2286	-1.15614	down	TIMM23	10431	Homo sapiens translocase of inner mitochondrial membrane 23 homolog (yeast) (TIMM23), nuclear gene encoding mitochondrial protein, mRNA,	chr10	51381510	51381788	TAACTGGTATGAACCCTCTGTCTCCTTATTTAAATGTGGATCCACGATAC
3170605	0.000235232	8.24001e-06	-2.22568	-1.15424	down	IKBIP	121457	Homo sapiens IKBKB interacting protein (IKBIP), transcript variant 1, mRNA,	chr12	99018177	99018226	CTGGAGTTAGGAGGGCCTGTGGTAGACAGCGTGAATCATGAAAATAAGCC
50450	1.87762e-05	4.91055e-08	-2.22507	-1.15385	down	TMEM179B	374395	Homo sapiens transmembrane protein 179B (TMEM179B), mRNA,	chr11	62313981	62314030	CCAGGTCGTGCAGTGGAAGTCTGAAGCCACCCCATACCGGCCTCTGGAGA
7040176	7.41981e-05	1.0411e-06	-2.22453	-1.1535	down	C20orf24	55969	Homo sapiens chromosome 20 open reading frame 24 (C20orf24), transcript variant 1, mRNA,	chr20	34671492	34671541	GTGGCACGTGGGAGCTCACGAAGGAAGGGTTTATGACCTCTTTTGCCTTG
4640168	9.94733e-05	1.95587e-06	-2.22033	-1.15078	down	PIN1	5300	Homo sapiens peptidylprolyl cis/trans isomerase, NIMA-interacting 1 (PIN1), mRNA,	chr19	9821252	9821301	CACGCTCCTCTGTTCAGTCGCAAAGGTGAACACTCATGCGGCCCAGCCAT
4480600	0.000299355	1.24709e-05	-2.21986	-1.15047	down	C20orf127	140851	Homo sapiens chromosome 20 open reading frame 127 (C20orf127), mRNA,	chr20	33269618	33269667	TCTGCAAAGGGGCGTGCAGCTGCTGTGTCTGATGTGGGGACAGCTCTTCT
4780047	0.000151733	3.97556e-06	-2.21975	-1.1504	down	DYNLRB1	83658	Homo sapiens dynein, light chain, roadblock-type 1 (DYNLRB1), mRNA,	chr20	32592123	32592172	TTTAATGCCCCCCAAGAATGTTAATGTCAATCATGTCAGTGGACTAGCAC
3930653	0.000242694	8.6907e-06	-2.21683	-1.1485	down	C7orf44	55744	Homo sapiens chromosome 7 open reading frame 44 (C7orf44), mRNA,	chr7	43679102	43679151	GTGACAGACACTCCTGCAACCCAGTTTTCCAGCCACCAGTGGGATGATGG
2360445	0.000122891	2.77746e-06	-2.21654	-1.14831	down	NHP2L1	4809	Homo sapiens NHP2 non-histone chromosome protein 2-like 1 (S, cerevisiae) (NHP2L1), transcript variant 1, mRNA,	chr22	42078362	42078411	ACGCGTGGTATCCTCGCGGTGTCCGGCAAGAGACTACCAAGACAGACGCT
4050370	0.000475138	2.53025e-05	-2.21562	-1.14771	down	METTL5	29081	Homo sapiens methyltransferase like 5 (METTL5), mRNA,	chr2	170678467	170678516	GTCGTTGCAGATCTAGGATGTGGTTGTGGAGTACTTAGCATCGGAACTGC
1780678	9.20942e-05	1.67998e-06	-2.21436	-1.14689	down	LOC374395	374395	Homo sapiens similar to RIKEN cDNA 1810059G22 (LOC374395), mRNA,	chr11	62314210	62314259	GGGGGGAAACATAATGACAGGCCCCCCTCCACCTCTTCCTGCAGCTGTTT
7320187	4.89756e-05	4.82724e-07	-2.21384	-1.14655	down	DCTN3	11258	Homo sapiens dynactin 3 (p22) (DCTN3), transcript variant 1, mRNA,	chr9	34613805	34613854	CCAAGCAATTCGTGCAGTGGGATGAGCTACTTTGCCAGCTAGAGGCCGCC
6270717	2.80939e-05	1.45425e-07	-2.21344	-1.14629	down	SNRPC	6631	Homo sapiens small nuclear ribonucleoprotein polypeptide C (SNRPC), mRNA,	chr6	34741316	34741365	TGCCCACTCGGCCCGGAATGACTCGACCAGACAGATAAGGATAGAGGGGA
7510315	1.77464e-05	3.78658e-08	-2.21334	-1.14622	down	HIGD2A	192286	Homo sapiens HIG1 hypoxia inducible domain family, member 2A (HIGD2A), mRNA,	chr5	175749204	175749253	AGGCCCATGTGTCGCTGGGGAGGAAGTGACCCTTTGTGTAACTGTAACCG
4040176	0.0110303	0.00232085	-2.21129	-1.14489	down	LAMA5	3911	Homo sapiens laminin, alpha 5 (LAMA5), mRNA,	chr20	60884288	60884337	CCTTGTGCTCGCCTCATAGGTGTCTATTTGGACTCTAAGCTCTACGGGTG
2510022	0.000495186	2.68442e-05	-2.21017	-1.14415	down	LOC643997	643997	PREDICTED: Homo sapiens similar to peptidylprolyl isomerase A isoform 1 (LOC643997), mRNA,	chr2	174059275	174059324	CACCGTGTTCTTCCACATCTCTGTCGACGGTGAGTCCTTGGGCCGCATCT
7550722	0.00015077	3.91624e-06	-2.20933	-1.14361	down	ZMYM6	9204	Homo sapiens zinc finger, MYM-type 6 (ZMYM6), mRNA,	chr1	35219996	35220045	ATCCAGGGTCAGCCAGTGTTGAAAGAGACATTTTGTCTACCTGGCACTGC
2810482	0.000794586	5.50082e-05	-2.2046	-1.14052	down	AHNAK	79026	Homo sapiens AHNAK nucleoprotein (AHNAK), transcript variant 1, mRNA,	chr11	62301545	62302522	GACCTGGACCCGTGAAGTCTTCAGCTCCTGCAGCTCTGAAGTGGTTCTGA
1770400	0.00223291	0.00024708	-2.20351	-1.13981	down	COMMD8	54951	Homo sapiens COMM domain containing 8 (COMMD8), mRNA,	chr4	47453547	47453596	CTGCGTGTTCAGAAACCTTGTGATGTCTTGACTGTTGCACCAGGCTGAGA
6450273	2.56697e-05	1.19224e-07	-2.20244	-1.1391	down	C1orf41	51668	Homo sapiens chromosome 1 open reading frame 41 (C1orf41), mRNA,	chr1	54178340	54183846	GGTCCGGCGCCCAGAGCTAACGGGAGTCCCAGGTTAAACACTTTAAGATG
1820037	0.000329799	1.44524e-05	-2.20054	-1.13786	down	SLC11A2	4891	Homo sapiens solute carrier family 11 (proton-coupled divalent metal ion transporters), member 2 (SLC11A2), mRNA,	chr12	49666112	49666161	GCTCTTGGCTCCCTTGAGGTTCTGCTAGTGGTGTTAGGAGTGGTTACAAC
7050189	5.34391e-05	5.85452e-07	-2.19892	-1.1368	down	PRPF19	27339	Homo sapiens PRP19/PSO4 pre-mRNA processing factor 19 homolog (S, cerevisiae) (PRPF19), mRNA,	chr11	60414964	60415013	GGGAACGGATGTGGAAGGAAGAACTGTCACCCTCTTAAGGCCCAGGGTCG
70441	0.000149915	3.86075e-06	-2.19824	-1.13635	down	NDUFS7	374291	Homo sapiens NADH dehydrogenase (ubiquinone) Fe-S protein 7, 20kDa (NADH-coenzyme Q reductase) (NDUFS7), mRNA,	chr19	1346513	1346562	TGTCGCCGTCCTGTCCCCAGCCTGCTTGTGTCCCGTGAGGTTGTCAATAA
4060255	0.000162733	4.45994e-06	-2.1959	-1.13481	down	ZNRD1	30834	Homo sapiens zinc ribbon domain containing 1 (ZNRD1), transcript variant a, mRNA,	chr6	30137769	30138024	CTGTGGTTGACAGGCGCTGCCCTCGATGTGGTCATGAAGGAATGGCATAC
2140634	0.0167516	0.00411829	-2.19318	-1.13302	down	VPS24	51652	Homo sapiens vacuolar protein sorting 24 homolog (S, cerevisiae) (VPS24), transcript variant 2, mRNA,	chr2	86730888	86730937	CAGCCCCATCCATGTTCCTGCAAAGGACATGATCTTTCTTTGGCAACCAC
5290162	3.57211e-05	2.43522e-07	-2.19317	-1.13302	down	LOC728324	728324	PREDICTED: Homo sapiens misc_RNA (LOC728324), miscRNA,	chr5	68665687	68665736	TGGCTGTGGGCTCTGCTGTGGGTCACGCCATTACTGGGGCTTTCAGGGGA
3420671	1.77464e-05	2.62765e-08	-2.19165	-1.13202	down	TRAPPC1	58485	Homo sapiens trafficking protein particle complex 1 (TRAPPC1), mRNA,	chr17	7833740	7833789	TGATGCTCTCCTCCTACCAGAGTGAAGCCCACAGAGTCCCTCCACCTCCA
6550377	0.000101553	2.0523e-06	-2.18892	-1.13022	down	LOC650157	650157	PREDICTED: Homo sapiens similar to TRIM5/CypA fusion protein (LOC650157), mRNA,	chr2	11409481	11409530	TACGTCCTGGCATCTTGTCCATGGCAAAAGCTGGACCCAACACGAATGGC
6660270	8.63033e-05	1.46111e-06	-2.1886	-1.13001	down	MRPL17	63875	Homo sapiens mitochondrial ribosomal protein L17 (MRPL17), nuclear gene encoding mitochondrial protein, mRNA,	chr11	6659775	6659824	TGGACAGTCTTGATGGGGTTGAGAACCTTCTGGGGAGCCAGATGACCCTC
5360326	0.000958259	7.22e-05	-2.18786	-1.12952	down	SIP1	8487	Homo sapiens survival of motor neuron protein interacting protein 1 (SIP1), transcript variant beta, mRNA,	chr14	38670966	38671015	GGCTCATTCACTGATTCGGCAGCTTGCAAGAAGGTGCTCTGAAGTGAGGC
1940164	0.000237555	8.34663e-06	-2.18762	-1.12936	down	LSM5	23658	Homo sapiens LSM5 homolog, U6 small nuclear RNA associated (S, cerevisiae) (LSM5), mRNA,	chr7	32493381	32493430	GCTGGTTCCTGGAGGAGAAGGACCTGAAGTGTGAATGAGTTTCCTTGACT
1580477	2.18413e-05	8.24013e-08	-2.1856	-1.12803	down	C11orf74	119710	Homo sapiens chromosome 11 open reading frame 74 (C11orf74), mRNA,	chr11	36616125	36626173	GATGTAAGCACCAGCATTCCTTCCTGTATCCCTTTTGTGGCCCAGCCTCC
6200468	0.000173265	5.13561e-06	-2.18488	-1.12756	down	CKS2	1164	Homo sapiens CDC28 protein kinase regulatory subunit 2 (CKS2), mRNA,	chr9	91116007	91116056	TTTCTGCAGCGCGCCACGAGGATGGCCCACAAGCAGATCTACTACTCGGA
3830746	2.12871e-05	7.75176e-08	-2.18442	-1.12725	down	UQCRB	7381	Homo sapiens ubiquinol-cytochrome c reductase binding protein (UQCRB), mRNA,	chr8	97314630	97316963	CAGAAGGCAACGCTTCTCTTTCTGGTCAAAATGGCTGGTAAGCAGGCCGT
730114	0.000186676	5.84783e-06	-2.18208	-1.1257	down	PRICKLE4	29964	Homo sapiens prickle homolog 4 (Drosophila) (PRICKLE4), mRNA,	chr6	41865023	41865303	GGCACCTCAGCCAGGGGTGTAGCCAAGTAGACAAATGGAATCCTGTGCTG
5390603	0.000351673	1.59721e-05	-2.17932	-1.12388	down	UPF2	26019	Homo sapiens UPF2 regulator of nonsense transcripts homolog (yeast) (UPF2), transcript variant 2, mRNA,	chr10	12124760	12124809	GCTGGAGTTGGTGCTGGGAAACCCGGGGCTAATGTTGACAACAGGCTCGA
4920162	7.29351e-05	1.00333e-06	-2.17854	-1.12336	down	FLYWCH2	114984	Homo sapiens FLYWCH family member 2 (FLYWCH2), mRNA,	chr16	2889108	2889157	AGAACTTTGCCCCCTGCTCTGTGGCGCCCGGCAAGTCCCTGTAACCTTGA
2190630	0.000252233	9.27338e-06	-2.17807	-1.12305	down	LOC391019	391019	PREDICTED: Homo sapiens misc_RNA (LOC391019), miscRNA,				ATGAAGGCCCAGGCTACAGCTGCAGCTTCAGTTCCAGTTCGGGCTCCCAG
1510131	0.000230276	7.95984e-06	-2.17732	-1.12256	down	ERH	2079	Homo sapiens enhancer of rudimentary homolog (Drosophila) (ERH), mRNA,	chr14	68916936	68916985	GGTTGGGGTGGGCTTGGAACACAGGTGTGTACAGCGTGCTGTAGTGGAAG
1090500	0.000230276	7.96026e-06	-2.17645	-1.12198	down	LOC645166	645166	PREDICTED: Homo sapiens similar to lymphocyte-specific protein 1 (LOC645166), mRNA,	chr1	147218034	147218083	TGTGCCTGGATACCTGAGTCACCAGGTGGAGGAAACTCCCATTGACATGC
5700709	0.000156948	4.19567e-06	-2.17531	-1.12122	down	LOC647037	647037	PREDICTED: Homo sapiens similar to Peptidyl-prolyl cis-trans isomerase NIMA-interacting 4 (Rotamase Pin4) (PPIase Pin4) (Parvulin 14) (Par14) (Peptidyl-prolyl cis/trans isomerase EPVH) (hPar14) (LOC647037), mRNA,	chr15	80089879	80089928	CAAGAAGGCTCAAGGTCCCAAAGGTGGTGGCAATGAAGTAAAGGTCACAC
7100523	0.000181358	5.57482e-06	-2.17308	-1.11974	down	LOC727826	727826	PREDICTED: Homo sapiens hypothetical LOC727826 (LOC727826), mRNA,	chr12	131912740	131912789	AGTGGGCGAGTGCCGGCCTTGCCGGCCTCTGAGCAAGACAGTGCACCTCA
6400128	0.000208312	6.90099e-06	-2.17218	-1.11914	down	PNKD	25953	Homo sapiens paroxysmal nonkinesigenic dyskinesia (PNKD), transcript variant 1, mRNA,	chr2	218844420	218844469	CAGAGGGCAAGGAGGAACCTGAACCCCTATCCCCGGAGCTGGAATACATT
1110228	3.87165e-05	2.86891e-07	-2.17145	-1.11866	down	TMEM136	219902	Homo sapiens transmembrane protein 136 (TMEM136), mRNA,	chr11	119706365	119706414	CCATGCTTGGAGAAGCAGGCGGAGTGAGGAACGGCAGCTGAAACACAACG
3140021	9.42635e-05	1.75125e-06	-2.16657	-1.11541	down	PCBD1	5092	Homo sapiens pterin-4 alpha-carbinolamine dehydratase/dimerization cofactor of hepatocyte nuclear factor 1 alpha (PCBD1), mRNA,	chr10	72643516	72643565	GTGGGATGTGCCAGTGTCCCCACCAACACCAGGAATTTAGACCTTTTCCC
6020541	0.000238087	8.3779e-06	-2.16488	-1.11428	down	LOC729646	729646	PREDICTED: Homo sapiens misc_RNA (LOC729646), miscRNA,	chr14	58331097	58331146	CCCGCCTTTCCAACTTGGACGCGGCAGAATGGTTCCCGCAAAGAAGGGTG
4260397	0.000212534	7.15103e-06	-2.16409	-1.11376	down	LOC727821	727821	PREDICTED: Homo sapiens misc_RNA (LOC727821), miscRNA,				GAAAAGGAATGCCCCGCAAGTGTTACCATGGCAAAACTGGAGGAGTCTAC
3400551	4.03979e-05	3.29401e-07	-2.16075	-1.11153	down	DYNLL2	140735	Homo sapiens dynein, light chain, LC8-type 2 (DYNLL2), mRNA,	chr17	53521625	53521674	TCCTCCTCTTCAAGTCAGGCTAGGTGGCCATGGTGAAGGTGTCAGTGGCG
7210725	9.20942e-05	1.683e-06	-2.15989	-1.11096	down	MRPL55	128308	Homo sapiens mitochondrial ribosomal protein L55 (MRPL55), nuclear gene encoding mitochondrial protein, transcript variant 5, mRNA,	chr1	226361124	226361173	GCTCCAGTCGAGGAAGGAGTACGAGCAGGAGCTCAGTGATGACTTGCATG
7000722	0.00144224	0.000132182	-2.15624	-1.10852	down	NEDD8	4738	Homo sapiens neural precursor cell expressed, developmentally down-regulated 8 (NEDD8), mRNA,	chr14	24701504	24701553	AAGAGTGCTGGAGGGCGGCAGCGGCGACCGGAGCGGTAGGAGCAGCAATT
4890270	1.53083e-05	1.48439e-08	-2.15529	-1.10788	down	LY6E	4061	Homo sapiens lymphocyte antigen 6 complex, locus E (LY6E), mRNA,	chr8	144174885	144174934	CAGGGAGACCGTGTCAGTAGGGATGTGTGCCTGGCTGTGTACGTGGGTGT
1690025	0.00147313	0.000136982	-2.15519	-1.10781	down	MCTS1	28985	Homo sapiens malignant T cell amplified sequence 1 (MCTS1), mRNA,	chrX	119628902	119628951	GGCAGAAGGAAAACAGCATGCTCTATGTGTTGGAGTCATGAAGATGTCTG
2060646	3.34919e-05	2.10178e-07	-2.15448	-1.10734	down	MRPL20	55052	Homo sapiens mitochondrial ribosomal protein L20 (MRPL20), nuclear gene encoding mitochondrial protein, mRNA,	chr1	1332424	1332473	GGCCTGCAGGCGCCATGGTCTTCCTCACCGCGCAGCTCTGGCTGCGGAAT
1510609	0.000750595	5.06083e-05	-2.15295	-1.10631	down	NME1-NME2	654364	Homo sapiens NME1-NME2 readthrough (NME1-NME2), mRNA,	chr17	46593607	46599210	GGAGACTTCTGCATACAAGTTGGCAGGACCATGGCCAACCTGGAGCGCAC
4220091	0.000202915	6.58106e-06	-2.1521	-1.10574	down	TSPO	706	Homo sapiens translocator protein (18kDa) (TSPO), transcript variant PBR-S, mRNA,	chr22	41888861	41888910	CTGGCCTTCACGACCACACTCAACTACTGCGTATGGCGGGACAACCATGG
6760746	6.79261e-05	9.10127e-07	-2.14927	-1.10384	down	MRPL55	128308	Homo sapiens mitochondrial ribosomal protein L55 (MRPL55), nuclear gene encoding mitochondrial protein, transcript variant 1, mRNA,	chr1	226362039	226362088	ACCGCCAGGCTTATGCACGACTCTACCCCGTGCTGCTGGTGAAGCAGGAT
6760414	0.00030356	1.28506e-05	-2.14907	-1.10371	down	C19orf60	55049	Homo sapiens chromosome 19 open reading frame 60 (C19orf60), transcript variant 2, mRNA,	chr19	18563960	18564009	CCTTAGGTTTGATGCGGAATCTGCCGAGTGATGGCGGCTCCCCAGGGATG
3130379	2.18413e-05	8.28585e-08	-2.14885	-1.10357	down	STX8	9482	Homo sapiens syntaxin 8 (STX8), mRNA,	chr17	9419890	9419939	GCCAGAGGAGACCAGAGGCTTGGGTTTTGATGAAATCCGGCAACAGCAGC
6560066	1.47165e-05	8.26921e-09	-2.1488	-1.10353	down	MTHFS	10588	Homo sapiens 5,10-methenyltetrahydrofolate synthetase (5-formyltetrahydrofolate cyclo-ligase) (MTHFS), mRNA,	chr15	77924696	77924745	AGCGCTGTTTGCAGCATCAGGAAGTGAAGCCCTACACCCTGGCGTTGGCT
1770747	0.000202705	6.56161e-06	-2.14864	-1.10342	down	TMEM160	54958	Homo sapiens transmembrane protein 160 (TMEM160), mRNA,	chr19	52241719	52241768	TTCCGCAATGGCCTCCTGGCATCGGGCATCGGGGTCATCTCCTTCATGCA
4880360	1.77464e-05	2.43408e-08	-2.14839	-1.10325	down	FBL	2091	Homo sapiens fibrillarin (FBL), mRNA,	chr19	45016987	45017036	CGTGGTCGTGGGAGTGTACAGGCCACCCCCCAAGGTGAAGAACTGAAGTT
6060719	0.000398602	1.91634e-05	-2.14536	-1.10122	down	RPL39L	116832	Homo sapiens ribosomal protein L39-like (RPL39L), mRNA,	chr3	188339722	188339771	TTTTCCGCCCGCGCCCCAGGCCCTTGCAGATCGAGATTTGCGTCCTAGAG
6130433	0.00067128	4.31732e-05	-2.14474	-1.1008	down	C8orf40	114926	Homo sapiens chromosome 8 open reading frame 40 (C8orf40), mRNA,	chr8	42527068	42527117	CTCCAAGTGGCTCAAAAGGCCTTGACACAGGGAACCTGCACATATCCAGG
4890689	0.00455842	0.000683907	-2.14429	-1.1005	down	CTHRC1	115908	Homo sapiens collagen triple helix repeat containing 1 (CTHRC1), mRNA,	chr8	104394752	104394801	CAGATTACCCAAAAGGAGATGCTTCTACTGGATGGAATTCAGTTTCTCGC
2940079	9.59864e-05	1.83147e-06	-2.14277	-1.09948	down	ENY2	56943	Homo sapiens enhancer of yellow 2 homolog (Drosophila) (ENY2), mRNA,	chr8	110352761	110355651	CTTGGTGGCTGAAATCACTCCAAAAGGCAGAGCCCTGGTACCTGACAGTG
2000445	5.34391e-05	5.84434e-07	-2.14031	-1.09782	down	PSMB10	5699	Homo sapiens proteasome (prosome, macropain) subunit, beta type, 10 (PSMB10), mRNA,	chr16	67968460	67968509	ACCCTGGAGCTAGTGGAGGAAACTGTGCAGGCTATGGAGGTGGAGTAAGC
7050576	0.000213907	7.23514e-06	-2.13965	-1.09737	down	COMMD7	149951	Homo sapiens COMM domain containing 7 (COMMD7), transcript variant 2, mRNA,	chr20	31290702	31290751	CAGAGCCCCCACGGATTTCTGCACACTCTGGGTCTGTGCTGGTGGAACAT
3140390	8.97153e-05	1.56815e-06	-2.13948	-1.09726	down	PON2	5445	Homo sapiens paraoxonase 2 (PON2), transcript variant 1, mRNA,	chr7	95034342	95034391	GCACAAAGTAAGCCTCACCTTTGCCTTCCAACTGCCAGAACATGGATTCC
730221	0.00063753	3.99855e-05	-2.13926	-1.09711	down	PTPLA	9200	Homo sapiens protein tyrosine phosphatase-like (proline instead of catalytic arginine), member A (PTPLA), mRNA,	chr10	17681355	17681404	AGAGAGTGTGGTGCTTTTTCTGGTCGCGTGGACTGTGACAGAGATCACTC
3800025	3.84295e-05	2.80898e-07	-2.13854	-1.09663	down	C2orf28	51374	Homo sapiens chromosome 2 open reading frame 28 (C2orf28), transcript variant 2, mRNA,	chr2	27292121	27292939	CCCAGAAATGTGTCCTGAGAATGGATCTTGTGTACCTGATGGTCCAGGTC
1940048	5.58435e-05	6.39512e-07	-2.13792	-1.09621	down	CLEC11A	6320	Homo sapiens C-type lectin domain family 11, member A (CLEC11A), mRNA,	chr19	51228675	51228724	ACCACGACTGCCAGCGGCGTCTCTACTACGTCTGCGAGTTCCCCTTCTAG
2750309	0.000113792	2.44086e-06	-2.13654	-1.09528	down	MRPL53	116540	Homo sapiens mitochondrial ribosomal protein L53 (MRPL53), nuclear gene encoding mitochondrial protein, mRNA,	chr2	74552811	74552860	GGCGCTCATCTCACCGCTCTGGAAATGCTCACCGCCTTCGCCTCCCACAT
4180445	0.000296876	1.2315e-05	-2.13233	-1.09243	down	C9orf142	286257	Homo sapiens chromosome 9 open reading frame 142 (C9orf142), mRNA,	chr9	139008047	139008096	CAGCTGGTGGCGTGGACTTCGATGAGACCTGAAGGTGCAGCACAAGCGTG
2710161	0.000140215	3.44262e-06	-2.13189	-1.09214	down	SELK	58515	Homo sapiens selenoprotein K (SELK), mRNA,	chr3	53919566	53919879	CCCCTCCAATGGCTGGTGGATGAGGAAGGTAAATGTCTGCTCTAAGAAGC
5820324	0.000163002	4.48712e-06	-2.13181	-1.09208	down	PXMP2	5827	Homo sapiens peroxisomal membrane protein 2, 22kDa (PXMP2), mRNA,	chr12	131774402	131774451	TACTTGCTCTTCCTGCGGCTCTACCCGGTGCTCACCAAGGCGGCCACCAG
4780398	0.00144496	0.00013279	-2.1284	-1.08977	down	NXT1	29107	Homo sapiens NTF2-like export factor 1 (NXT1), mRNA,	chr20	23283196	23283245	TTCTGTTGTTGCGGAGACACTGCAGACTCCACTGTGCCGAGGTTGAACTC
520324	0.000104246	2.14737e-06	-2.12728	-1.08901	down	REEP5	7905	Homo sapiens receptor accessory protein 5 (REEP5), mRNA,	chr5	112240434	112240483	TGGATCAACAACTGCTACTCTCGGGAAGACTCCTCTACTCACAGCTGAAG
1470561	0.000146428	3.73274e-06	-2.12651	-1.08849	down	FAM173A	65990	Homo sapiens family with sequence similarity 173, member A (FAM173A), mRNA,	chr16	712407	712456	CGGTTGGCGAGGGCCTGGACCGAGTATGGGCTTATGATGTTCCTGAGGGT
160204	0.000418122	2.05827e-05	-2.1254	-1.08773	down	RPP40	10799	Homo sapiens ribonuclease P/MRP 40kDa subunit (RPP40), mRNA,	chr6	4995315	4995364	CAGGACTATTGGCTTCAGATGGCTGTTGGGGCAAATGATCACTGTCCACC
7210224	6.16042e-05	7.46982e-07	-2.12425	-1.08696	down	DYNLRB1	83658	Homo sapiens dynein, light chain, roadblock-type 1 (DYNLRB1), mRNA,	chr20	32567925	32577780	ATGGCAGAGGTGGAGGAGACACTGAAGCGACTGCAGAGCCAGAAGGGAGT
6200332	0.00908212	0.00178905	-2.12425	-1.08695	down	VPS24	51652	Homo sapiens vacuolar protein sorting 24 homolog (S, cerevisiae) (VPS24), transcript variant 2, mRNA,	chr2	86731018	86731067	CCCACCCTCCACCCTCAGGTAGGCCCCAGTATGTTATTCCTTTGTGTCCA
2450358	0.000836511	5.92275e-05	-2.12386	-1.08669	down	CKS1B	1163	Homo sapiens CDC28 protein kinase regulatory subunit 1B (CKS1B), mRNA,	chr1	153218093	153218142	CCTAAGCTGAGTGTGACCCCAGAAGCCACGATGTGCTCTGTATCCAGAAC
770437	0.00124243	0.000104903	-2.12352	-1.08646	down	LOC652864	652864	PREDICTED: Homo sapiens similar to Mitochondrial import inner membrane translocase subunit Tim23 (LOC652864), mRNA,				TGGGGCAGATTTGAGCTGGCCTTCTTTACGATTGGAGGGTGTTGCATGAC
20450	0.000198857	6.33927e-06	-2.12207	-1.08547	down	LOC729580	729580	PREDICTED: Homo sapiens hypothetical LOC729580 (LOC729580), mRNA,	chr20	33328401	33328450	TGCTCTCCATCCTGGATCGTAAGGAGGCATCATCAGGCTGTGTTCCTGGA
4880195	3.08761e-05	1.82683e-07	-2.11859	-1.08311	down	LOC440991	440991	PREDICTED: Homo sapiens misc_RNA (LOC440991), miscRNA,	chr3	185350655	185350704	CGATCCACAGTGGAGACCCTATTAACTACTACGTTGGCACTGCTGTGTGC
7330392	0.00460014	0.000691529	-2.11741	-1.0823	down	TAP1	6890	Homo sapiens transporter 1, ATP-binding cassette, sub-family B (MDR/TAP) (TAP1), mRNA,	chr6	32921087	32921136	GTAACGGAGTTTAGAGCCAGGGCTGATGCTTTGGTGTGGCCAGCACTCTG
7100717	0.000167204	4.72544e-06	-2.11516	-1.08077	down	RPS15A	6210	Homo sapiens ribosomal protein S15a (RPS15A), transcript variant 2, mRNA,	chr16	18801567	18801616	CTGAGAGCTCCAATTTCATCCGTCTGCCATCGGCGCCATCCTGCAATCTA
6580369	5.2255e-05	5.48914e-07	-2.11463	-1.0804	down	DYNLRB1	83658	Homo sapiens dynein, light chain, roadblock-type 1 (DYNLRB1), mRNA,	chr20	32567868	32567917	AGAAAGGCACAGGACTCGCTAAGTGTTCGCTACGCGGGGCTACCGGATCG
5490477	3.84295e-05	2.77905e-07	-2.1146	-1.08039	down	EBPL	84650	Homo sapiens emopamil binding protein-like (EBPL), mRNA,	chr13	49133240	49133289	TTCCTCCCAGAGTGGCTCACCAGAAGCCCCAACCTCAACACCAGCAACTG
6350292	0.000321389	1.39035e-05	-2.11417	-1.08009	down	C1orf50	79078	Homo sapiens chromosome 1 open reading frame 50 (C1orf50), mRNA,	chr1	43013681	43013730	GGACCTGGCTGTCAACCTCCTTGTTGCCCCCACTGTTGCCTTGAGAATTG
4760431	0.000138568	3.35058e-06	-2.11335	-1.07953	down	LOC136143	136143	PREDICTED: Homo sapiens similar to ribosomal protein L18 (LOC136143), mRNA,	chr7	120868466	120868515	CCACCTCTGTCCCTTTCCCGGATGATCCCGAAAATGAAGCTTCCTGGCCA
2060288	0.000333936	1.47403e-05	-2.11179	-1.07847	down	PLP2	5355	Homo sapiens proteolipid protein 2 (colonic epithelium-enriched) (PLP2), mRNA,	chrX	48918053	48918102	CCCCAACAACAACATTCCCAGCAGACCAACTCCCACCCCCTCTTTGAGGT
5570048	4.97106e-05	5.0583e-07	-2.11173	-1.07843	down	ERLIN2	11160	Homo sapiens ER lipid raft associated 2 (ERLIN2), transcript variant 1, mRNA,	chr8	37734227	37734276	ACTGCTGGATTGATTGCCGTGGGTTGATAGCTGGAGGAATTGTTTTGGAC
10414	0.00239959	0.000275406	-2.11154	-1.0783	down	PTTG1	9232	Homo sapiens pituitary tumor-transforming 1 (PTTG1), mRNA,	chr5	159781951	159782305	GGTTGCTAAGGATGGGCTGAAGCTGGGGTCTGGACCTTCAATCAAAGCCT
6560577	2.94283e-05	1.57133e-07	-2.10713	-1.07528	down	HSPB3	8988	Homo sapiens heat shock 27kDa protein 3 (HSPB3), mRNA,	chr5	53752081	53752130	CGGTTCCTGTTCAGATGACATGGGGAAGATGATGGTTCAGCCACTGGTAC
650598	0.000178175	5.40135e-06	-2.10695	-1.07516	down	CSTF3	1479	Homo sapiens cleavage stimulation factor, 3' pre-RNA, subunit 3, 77kDa (CSTF3), transcript variant 2, mRNA,	chr11	33163241	33163290	AGCACGGAAGACTTATGAACGCCTTGTTGCCCAGTTCCCCAGTTCTGGCA
6660196	0.000103321	2.09902e-06	-2.10694	-1.07515	down	SHFM1	7979	Homo sapiens split hand/foot malformation (ectrodactyly) type 1 (SHFM1), mRNA,	chr7	96339149	96339198	TTTCCCCAAGTCTCTATGGTAGCGTCAGCGTCGGAGGCGGTAGTGACGGT
1340575	0.00155118	0.000147831	-2.10481	-1.07369	down	LOC100130715	100130715	PREDICTED: Homo sapiens misc_RNA (LOC100130715), miscRNA,				CAGGGCCAGGATCAGGGCCAGGTCTGTGCTAGGGCCAGCTCCAGATGAGG
5130670	0.000100167	2.00227e-06	-2.1046	-1.07355	down	MED31	51003	Homo sapiens mediator complex subunit 31 (MED31), mRNA,	chr17	6547839	6547888	TGAACAGCAGATTCTACATTGGCAGCACTATTCCCGGAAGCGGATGCGCC
3460324	0.000958556	7.23208e-05	-2.10169	-1.07155	down	PSMA3	5684	Homo sapiens proteasome (prosome, macropain) subunit, alpha type, 3 (PSMA3), transcript variant 2, mRNA,	chr14	57794401	57794450	TGCAGACAGAGTGGCCATGTATGTGCATGCATATACACTCTACAGTGCTG
5090053	0.000231512	8.0398e-06	-2.099	-1.0697	down	FDX1L	112812	Homo sapiens ferredoxin 1-like (FDX1L), mRNA,	chr19	10421003	10421052	AAGCCCCTGTGAAGGACAACACCCCTGCTTGGGAGAGAGTCCCATGTCCA
5080768	1.95035e-05	5.35674e-08	-2.09808	-1.06907	down	LOC653147	653147	Homo sapiens hCG1995786 (LOC653147), mRNA,	chr11	2313354	2313403	CGCAAGGACGACGAGGTCCAGGTAGTTCGAGGACACTACAAAGGTCAGCA
1570725	2.12871e-05	7.18208e-08	-2.09545	-1.06726	down	APOA1BP	128240	Homo sapiens apolipoprotein A-I binding protein (APOA1BP), mRNA,	chr1	154830352	154830401	CCCTCACAGCCCCCAAAAAATCTGCAACCCAGTTTACCGGTCGCTACCAT
1240152	0.0013035	0.000113874	-2.09534	-1.06718	down	CFD	1675	Homo sapiens complement factor D (adipsin) (CFD), mRNA,	chr19	814271	814320	GCAACAAAGTCCCGAGCAATGAAGTCATCCACTCCTGCATCTGGTTGGTC
4560367	0.000135445	3.22705e-06	-2.09166	-1.06465	down	NDUFA8	4702	Homo sapiens NADH dehydrogenase (ubiquinone) 1 alpha subcomplex, 8, 19kDa (NDUFA8), nuclear gene encoding mitochondrial protein, mRNA,	chr9	124906468	124906517	GATGGGTCCGTGGCCCACACTCGGTCATGTGCTCAGACAACGACTGATGA
1780259	0.000519075	2.91054e-05	-2.08947	-1.06313	down	CCDC109B	55013	Homo sapiens coiled-coil domain containing 109B (CCDC109B), mRNA,	chr4	110825961	110828157	GACCTTGCTAAGGCTAAAGAATCCCTGAAACAGGCGCGTCATTCTCTCTG
5420347	2.95154e-05	1.66453e-07	-2.08901	-1.06282	down	HCFC1R1	54985	Homo sapiens host cell factor C1 regulator 1 (XPO1 dependent) (HCFC1R1), transcript variant 3, mRNA,	chr16	3072707	3072756	CTGGGCACCAAGACCTTCCCTCAACAGAGGACACTGAGCCCAACGGAGTT
1820543	3.53245e-05	2.32018e-07	-2.08883	-1.06269	down	ZNF428	126299	Homo sapiens zinc finger protein 428 (ZNF428), mRNA,	chr19	48803470	48803519	GATGGGGTACTGCCGGTCTGTGTTGTCTTAGAAGTAGATGTGTGATGGCC
4570301	0.00507214	0.000791977	-2.08779	-1.06198	down	LOC100130775	100130775	PREDICTED: Homo sapiens misc_RNA (LOC100130775), miscRNA,	chr12	100342383	100342432	TCAGGAGAGAAGAAGAGGAAACACAAGAGGAAACGCCTGGTGCAGAGCCC
240546	1.46335e-05	4.66943e-09	-2.08477	-1.05989	down	SCAND1	51282	Homo sapiens SCAN domain containing 1 (SCAND1), transcript variant 2, mRNA,	chr20	34542098	34542147	AGAAACTGGAAGGAGCCGGTTCGAGCTCAGCCCCTGAGCGTAACTGTGTG
2360091	0.000438479	2.23865e-05	-2.08177	-1.05781	down	RNU1G2	26864	Homo sapiens RNA, U1G2 small nuclear (RNU1G2), small nuclear RNA,	chr1	145969306	145969355	TGTGCTGCCCCTGCGATTTCCCCAAATGTGGGAAACTCGACTGCATAATT
6650079	0.000100167	2.00833e-06	-2.08115	-1.05738	down	C3orf14	57415	Homo sapiens chromosome 3 open reading frame 14 (C3orf14), mRNA,	chr3	62292088	62293992	CCACGGCCTGAGGTGGTTTCTCTTGAGACTCGTTACTGGGCATCAGTAGA
5340246	0.0003715	1.72282e-05	-2.07961	-1.05632	down	CRIP2	1397	Homo sapiens cysteine-rich protein 2 (CRIP2), mRNA,	chr14	105017359	105017408	CCACCTGCCAGTGTTATTTATGCTCCCTTCGTGGGTGATGGCCACGCCCT
1230019	9.94733e-05	1.9447e-06	-2.07915	-1.05599	down	TSPO	706	Homo sapiens translocator protein (18kDa) (TSPO), transcript variant PBR, mRNA,	chr22	41885255	41885304	TCCCGCTTTGTCCACGGCGAGGGTCTCCGCTGGTACGCCGGCCTGCAGAA
5810088	2.36525e-05	9.97926e-08	-2.07802	-1.05521	down	AURKAIP1	54998	Homo sapiens aurora kinase A interacting protein 1 (AURKAIP1), mRNA,	chr1	1298975	1299024	CGCCCGTTGCTGCTGTGATCCGTAGTAATAAATTCTCAGAGGACTCAGCC
3930392	3.79266e-05	2.67158e-07	-2.07787	-1.05511	down	ANG	283	Homo sapiens angiogenin, ribonuclease, RNase A family, 5 (ANG), transcript variant 2, mRNA,	chr14	20232018	20232067	CCTGGTCAAGTGCTGGCTCTGCTGTCCTTGCCTTCCATTTCCCCTCTGCA
2340474	0.000336831	1.49994e-05	-2.0768	-1.05437	down	SERF1B	728492	Homo sapiens small EDRK-rich factor 1B (centromeric) (SERF1B), mRNA,	chr5	69321156	69321205	AGCCGGGCGGAGGGCCCACGAGGGCTCAGCCTTCCCGGTCAGCGGTGGTG
5130414	0.000125443	2.87755e-06	-2.07601	-1.05382	down	C9orf23	138716	Homo sapiens chromosome 9 open reading frame 23 (C9orf23), transcript variant 1, mRNA,	chr9	34610743	34610792	TGAGCCAGCCTGTTCTCCGGGCCTGAATGTCTGGGGTGCTTGTGCCTTTT
7000161	0.00655574	0.00113613	-2.07597	-1.05378	down	OIP5	11339	Homo sapiens Opa interacting protein 5 (OIP5), mRNA,	chr15	41601612	41601661	GATGCAGAGTCCCATGTGTCCTCTGATCTAAAGTTGCATGGTTGGTCTGA
2070494	0.0015976	0.000154169	-2.07499	-1.05311	down	PRC1	9055	Homo sapiens protein regulator of cytokinesis 1 (PRC1), transcript variant 2, mRNA,	chr15	91509500	91509549	CATGTCACTACTGGGGAGGTGTTCCTGCTCTAGCTTCCACGATGAGGCGC
150441	0.000381897	1.78729e-05	-2.07306	-1.05176	down	TIGA1	114915	Homo sapiens TIGA1 (TIGA1), mRNA,	chr5	111524884	111525340	CCCTACAGGTGGAAGATGGATGCCTGAAGTGTAGACTGCTGCTAGCTGAA
6400025	2.32704e-05	9.12237e-08	-2.07184	-1.05091	down	C16orf61	56942	Homo sapiens chromosome 16 open reading frame 61 (C16orf61), mRNA,	chr16	79567257	79567306	GGGCAGGGCGTTTAGTACTGTCTCCCCTTTACCAGCAAACCTGACTTCAC
6900392	1.47165e-05	1.3566e-08	-2.06944	-1.04924	down	CHCHD5	84269	Homo sapiens coiled-coil-helix-coiled-coil-helix domain containing 5 (CHCHD5), mRNA,	chr2	113060300	113060349	GAGGAGTGTCTTCGACAGAACGAGGCAGCTGTGGGCAACTGTGCAGAGCA
2600324	5.53942e-05	6.24547e-07	-2.06937	-1.04919	down	TMEM147	10430	Homo sapiens transmembrane protein 147 (TMEM147), mRNA,	chr19	36037927	36038065	GTCTGGTCCATTACATCGTCGCGTCTGCTCAGGTCTGGATGATAACACGC
2030577	0.000114179	2.45917e-06	-2.06919	-1.04906	down	TIMP3	7078	Homo sapiens TIMP metallopeptidase inhibitor 3 (TIMP3), mRNA,	chr22	31588368	31588417	CCCCTCGTTCCAGACCTGCCTCATGGTGGCAACATGGTTCTTGAACAATT
2350465	2.32704e-05	9.16083e-08	-2.06905	-1.04897	down	RPL29	6159	Homo sapiens ribosomal protein L29 (RPL29), mRNA,	chr3	52029908	52029957	TTCCGGCGTTGTTGACCCTATTTCCCGTGCTGCACCGCAGCCCCTTTCTC
1510564	0.00219683	0.000241141	-2.06204	-1.04407	down	TMEM4	10330	Homo sapiens transmembrane protein 4 (TMEM4), mRNA,	chr12	54991379	54991428	GCTGCTGGAGGAGATATGTGACCGGATGAAGGAGTATGGGGAACAGATTG
2070170	0.000353623	1.61108e-05	-2.0595	-1.0423	down	UBE2L6	9246	Homo sapiens ubiquitin-conjugating enzyme E2L 6 (UBE2L6), transcript variant 1, mRNA,	chr11	57319155	57319204	CCTCCAGCATTCAGTCCAGGGGGAGCCACGGAAACCATGTTCTTGCTTAA
6370484	3.87165e-05	2.85618e-07	-2.05674	-1.04036	down	POLR1D	51082	Homo sapiens polymerase (RNA) I polypeptide D, 16kDa (POLR1D), transcript variant 1, mRNA,	chr13	27095480	27095529	ACTCTGTCCTTCAGAAAGGCGTGATTCTAGCTGTTGACCCCTTGCAGCTG
5360307	0.000635183	3.97352e-05	-2.05525	-1.03932	down	LOC644937	644937	PREDICTED: Homo sapiens similar to ribosomal protein L10 (LOC644937), mRNA,				CACTCACGAGGGCTTCCACTGTGCTGCCGCCCTCTTAATATTCACCAATA
1450156	9.53559e-05	1.80251e-06	-2.05432	-1.03866	down	MAGOH	4116	Homo sapiens mago-nashi homolog, proliferation-associated (Drosophila) (MAGOH), mRNA,	chr1	53694597	53699233	TCCTGACCGAGTGGGCCGGCAGGAGCTTGAAATCGTCATTGGAGATGAAC
3400674	9.50218e-05	1.79229e-06	-2.05258	-1.03744	down	MRPS15	64960	Homo sapiens mitochondrial ribosomal protein S15 (MRPS15), nuclear gene encoding mitochondrial protein, mRNA,	chr1	36694381	36694430	CTGTATTACCGAAGAGCCCACCGCCGATTCGTGACCAAGAAGGCTCTGTG
3800445	3.3106e-05	2.01887e-07	-2.05224	-1.0372	down	MRPL24	79590	Homo sapiens mitochondrial ribosomal protein L24 (MRPL24), nuclear gene encoding mitochondrial protein, transcript variant 2, mRNA,	chr1	154974526	154974783	GGGTGGTCGTGGGAGGGCTGAACACACATTACCGCTACATTGGCAAGACC
4050270	0.00279607	0.00034112	-2.0522	-1.03717	down	LOC652481	652481	PREDICTED: Homo sapiens similar to Mitochondrial import inner membrane translocase subunit Tim23 (LOC652481), mRNA,				GTTACTCGCACGCGGATTTGGCTGGCGTCCCGCGTAAGTATGGGGCCTAG
4150475	0.000303493	1.28333e-05	-2.04924	-1.03509	down	CNPY2	10330	Homo sapiens canopy 2 homolog (zebrafish) (CNPY2), mRNA,	chr12	56704271	56704320	CCACACTGGCTTGATGGATCACCCCCAGGAGGGGAAAATGGTGGCAATGC
5870678	0.00701496	0.00125352	-2.04665	-1.03326	down	LOC441763	441763	PREDICTED: Homo sapiens hypothetical LOC441763 (LOC441763), mRNA,	chr16	33871429	33871478	GGCGTCCCCCAACTTCTTAGAGGGACAAGTGGCCTTCAGCCACCCGAAAT
6270288	0.000204202	6.71865e-06	-2.04409	-1.03146	down	SNRPB2	6629	Homo sapiens small nuclear ribonucleoprotein polypeptide B'' (SNRPB2), transcript variant 1, mRNA,	chr20	16658734	16658783	GCTGTTTCGGTTTTCCTGGCTCCTCGGCCCTTTTCTCCCCTGTTGCAGCT
5690576	0.000409949	2.00432e-05	-2.04312	-1.03078	down	TBCB	1155	Homo sapiens tubulin folding cofactor B (TBCB), mRNA,	chr19	36616645	36616694	GGACTTCCCGGAGGAGGACTACGGGTTGGACGAGATATGACACCTAAGGA
6860162	0.000346239	1.56025e-05	-2.04303	-1.03071	down	LOC441019	441019	PREDICTED: Homo sapiens hypothetical LOC441019 (LOC441019), mRNA,	chr4	69391520	69393900	TAGAACTATTATTGACCACGCCTCCTCCAAGTCCCAGCGAGCCCGTGTAC
670278	0.000495699	2.69247e-05	-2.04257	-1.03038	down	NES	10763	Homo sapiens nestin (NES), mRNA,	chr1	156638718	156638767	TGACATGCTGGCTTTTGTGCCCAAGCTCACCAGCCCTGCGCCACCTCACT
4390487	0.000638717	4.00877e-05	-2.04165	-1.02974	down	RAB13	5872	Homo sapiens RAB13, member RAS oncogene family (RAB13), mRNA,	chr1	153954462	153954511	GAGCAGGGGAGAAATAGCAGAGGGGCTTGGAGGGTCACATAGGTAGATGG
3990202	0.00462484	0.000696414	-2.0404	-1.02885	down	HMGB1L1	10357	Homo sapiens high-mobility group box 1-like 1 (HMGB1L1), mRNA,	chr20	56063650	56063699	ACTGGGAGAGATGTGGAATAACACTGCTGCAGATGACAAGCAGCCTGGTG
5290593	4.03979e-05	3.36306e-07	-2.03814	-1.02725	down	GAMT	2593	Homo sapiens guanidinoacetate N-methyltransferase (GAMT), transcript variant 1, mRNA,	chr19	1397140	1397189	CACCAGCAGCTTTCCCAGCTTCTCTGTGAGGGTCACTGCTGCCCACTGCA
7040544	7.99731e-05	1.20796e-06	-2.036	-1.02574	down	CCDC53	51019	Homo sapiens coiled-coil domain containing 53 (CCDC53), mRNA,	chr12	102406943	102419773	GGACTAGACCCAGATCTTCTTGAGAGGCCAGATGCTCCAGTGCCTGATGG
7560100	0.00560754	0.000914741	-2.03528	-1.02523	down	NUDT11	55190	Homo sapiens nudix (nucleoside diphosphate linked moiety X)-type motif 11 (NUDT11), mRNA,	chrX	51249937	51249986	GTGACACTCTTCCTCATGATACCAGTGAAATGTATTGATTGTGTCCCCAG
990615	0.000348658	1.58118e-05	-2.03471	-1.02482	down	MTCP1	4515	Homo sapiens mature T-cell proliferation 1 (MTCP1), nuclear gene encoding mitochondrial protein, transcript variant B1, mRNA,	chrX	153943384	153943433	CAGGCTGTCATCCAAGAACTGCGTAAGTGTTGTGCTCAGTATCCCAAGGG
6960025	0.000167803	4.78331e-06	-2.03374	-1.02413	down	DPY30	84661	Homo sapiens dpy-30 homolog (C, elegans) (DPY30), mRNA,	chr2	32254701	32254750	GATCTCCAGTCTTTGCCAACTCGTGCCTACCTGGATCAGACAGTTGTGCC
5270735	0.000348608	1.57711e-05	-2.03302	-1.02363	down	LOC100130892	100130892	PREDICTED: Homo sapiens hypothetical protein LOC100130892 (LOC100130892), mRNA,				TATTGCATGGGGGTACCCCAATCTGAAGTCAGTAAATGAACTAATCTACA
4590228	0.00015219	4.00373e-06	-2.0329	-1.02354	down	GLRX	2745	Homo sapiens glutaredoxin (thioltransferase) (GLRX), mRNA,	chr5	95175728	95175777	AGTTGGTCTTGGTGTCATATGGATCAGAGGCACAAGTGCAGAGGCTGTGG
3140138	0.000106982	2.2265e-06	-2.03277	-1.02345	down	C12orf47	51275	PREDICTED: Homo sapiens chromosome 12 open reading frame 47 (C12orf47), misc RNA,				GGCCTGAAGATGGGAGATTCCTAAGTGGAGGAGAACTGTGCCTTACTGAC
2340026	9.12804e-05	1.65052e-06	-2.0314	-1.02248	down	MRPL18	29074	Homo sapiens mitochondrial ribosomal protein L18 (MRPL18), nuclear gene encoding mitochondrial protein, mRNA,	chr6	160138343	160138392	GCACTTGTGGAGCATCAGAATGGCAAGGTTGTGGTTTCGGCCTCCACTCG
2970482	0.000276477	1.09787e-05	-2.03112	-1.02228	down	RNU1-5	26863	Homo sapiens RNA, U1 small nuclear 5 (RNU1-5), small nuclear RNA,	chr1	149224093	149224142	GTGCTGACCCCTGCGATTTCCCCAAATGTGGGAAACTCGACTGCATAATT
6130390	5.13787e-05	5.34938e-07	-2.03016	-1.02159	down	RPL26L1	51121	Homo sapiens ribosomal protein L26-like 1 (RPL26L1), mRNA,	chr5	172328135	172328184	TCATCTACATCGAGCGGGTGCAGCGTGAGAAGGCCAACGGCACAACTGTC
2650598	0.000457376	2.38377e-05	-2.02927	-1.02096	down	CYP4V2	285440	Homo sapiens cytochrome P450, family 4, subfamily V, polypeptide 2 (CYP4V2), mRNA,	chr4	187371417	187371466	GATGATCAAGGTTTGTGTGCCCATTACCTTTCCTCTGCCTGAAAGACGTG
7100010	0.000113446	2.4294e-06	-2.02846	-1.02039	down	NBL1	4681	Homo sapiens neuroblastoma, suppression of tumorigenicity 1 (NBL1), transcript variant 2, mRNA,	chr1	19857182	19857231	GAACTCCAGGACGAGGAGGACATGGGACTTGCGTGGACAGTCAGGGTTCA
3440064	4.71486e-05	4.51342e-07	-2.02834	-1.0203	down	LOC729406	729406	PREDICTED: Homo sapiens misc_RNA (LOC729406), miscRNA,				GCGAACGGTGGCTCCCACAGGACAATTGCTGCCCCTCGACCTCGTAGCAA
3180609	0.00291229	0.000360771	-2.02785	-1.01995	down	LOC100008588	100008588	Homo sapiens 18S ribosomal RNA (LOC100008588), non-coding RNA,				GCGTTGATTAAGTCCCTGCCCTTTGTACACACCGCCCGTCGCTACTACCG
450598	0.000245877	8.9616e-06	-2.02764	-1.0198	down	PHF5A	84844	Homo sapiens PHD finger protein 5A (PHF5A), mRNA,	chr22	41855968	41856017	CTTGCAGCAGCTCTGGTGGCAGCTGTCCTTGAGGAACCTTTGGTGTGTGG
4070376	0.000326721	1.42597e-05	-2.02493	-1.01787	down	NCRNA00219	114915	Homo sapiens non-protein coding RNA 219 (NCRNA00219), non-coding RNA,	chr5	111496992	111497448	GGTGGAAGATGGATGCCTGAAGTGTAGACTGCTGCTAGCTGAATACCATC
4890706	0.000756287	5.11878e-05	-2.02212	-1.01587	down	DR1	1810	Homo sapiens down-regulator of transcription 1, TBP-binding (negative cofactor 2) (DR1), mRNA,	chr1	93600166	93600215	ACTTATGTATTCACCAAGCCCAAAAATAGATTGTGGCTCCCAGGATTCCA
780753	5.94662e-05	6.97284e-07	-2.02149	-1.01542	down	SUPT16H	11198	Homo sapiens suppressor of Ty 16 homolog (S, cerevisiae) (SUPT16H), mRNA,	chr14	20889760	20889809	GGAAGGGAGGCCATATCTACAACACAGCCTCTCGGCACTGCTGCTCCTTA
4120341	0.000828756	5.85281e-05	-2.02093	-1.01502	down	ITGAE	3682	Homo sapiens integrin, alpha E (antigen CD103, human mucosal lymphocyte antigen 1; alpha polypeptide) (ITGAE), mRNA,	chr17	3623661	3626595	GAACTTGGAGAGCATCAGGAAGGCCCAGCTGAAATCAGAGAATCTGCTCG
160255	3.53245e-05	2.35455e-07	-2.02092	-1.01501	down	LSM10	84967	Homo sapiens LSM10, U7 small nuclear RNA associated (LSM10), mRNA,	chr1	36859379	36859428	TCCATCGGGTGCGAAACTTTGGTGGCAAGGGCCAAGGCCGGTGGGAATTT
2350368	0.000714853	4.70655e-05	-2.02086	-1.01497	down	RPF2	84154	Homo sapiens ribosome production factor 2 homolog (S, cerevisiae) (RPF2), mRNA,	chr6	111345439	111345488	TGGGACCCTCATTGGATCTGGTTCTGAGGAGGACACACCTGGCATCGGAT
2100341	0.000312071	1.33879e-05	-2.01972	-1.01415	down	C14orf2	9556	Homo sapiens chromosome 14 open reading frame 2 (C14orf2), mRNA,	chr14	103448545	103448594	GTACTGCTTTCAGTGTGTTCCCCCTCAGCCCCTCCGGCGTGTCAGGCATA
6380259	0.000128488	2.98386e-06	-2.01918	-1.01377	down	LOC729217	729217	PREDICTED: Homo sapiens misc_RNA (LOC729217), miscRNA,				CGTGTGCGAGATGTATGGCTGCTGGATGACCTTCCTCCCAGAGTGGCTCA
1410079	8.87545e-05	1.5379e-06	-2.01814	-1.01303	down	CDC26	246184	Homo sapiens cell division cycle 26 homolog (S, cerevisiae) (CDC26), mRNA,	chr9	116029355	116029404	CTGATGCTTCACTTGCACTCTAAGCTGGAATCCAAACTCTGGTTTGTCTC
6590053	6.62354e-05	8.70313e-07	-2.01711	-1.01229	down	ARD1A	8260	Homo sapiens ARD1 homolog A, N-acetyltransferase (S, cerevisiae) (ARD1A), mRNA,	chrX	153195465	153195514	CCTCAGCGAGGTCAGCGAGACCACAGAGAGCACAGATGTCAAGGACAGCT
6130064	7.99731e-05	1.21495e-06	-2.0146	-1.0105	down	MEA1	4201	Homo sapiens male-enhanced antigen 1 (MEA1), mRNA,	chr6	43088197	43088246	AGTGGGAAGATGTGGTACAGAAAGCCCTCCAAGCCCGGCAGGCATCCCCT
3940392	0.00158163	0.000152078	-2.01455	-1.01046	down	KIAA0367	23273	Homo sapiens KIAA0367 (KIAA0367), mRNA,	chr9	78416421	78416470	CTCTCTAAGACATTCTCTGAGGTGTGTGAGGAAGTCACTACTCCTAGCCT
2690608	0.000203695	6.66426e-06	-2.01316	-1.00946	down	RPS7	6201	Homo sapiens ribosomal protein S7 (RPS7), mRNA,	chr2	3600728	3600777	GCGCTGTTTCCGCCTCTTGCCTTCGGACGCCGGATTTTGACGTGCTCTCG
5560543	5.06261e-05	5.20531e-07	-2.01298	-1.00933	down	CBR3	874	Homo sapiens carbonyl reductase 3 (CBR3), mRNA,	chr21	36440497	36440546	AGCTGACAGGATTCTGGTGAATGCGTGCTGCCCAGGACCAGTGAAGACAG
6380187	2.87926e-05	1.51083e-07	-2.01276	-1.00918	down	C21orf57	54059	Homo sapiens chromosome 21 open reading frame 57 (C21orf57), transcript variant 1, mRNA,	chr21	46531282	46531331	GCGAGTCATCCCCATCAGGAGAGCGCCACTTCGCAGTAAGATCGAGATTG
540601	3.94884e-05	3.04887e-07	-2.01241	-1.00892	down	BRI3P1	730010	PREDICTED: Homo sapiens misc_RNA (BRI3P1), miscRNA,				GAGAGGCAGCGCTGCTGCTCCTGCCCCAGGCTCATGACAACTCAATGAAG
4060209	0.000354994	1.61859e-05	-2.00916	-1.0066	down	LOC643911	643911	PREDICTED: Homo sapiens hCG1815491 (LOC643911), miscRNA,				CTGGCTATTGGAAGGAGGAGATTCTGAAGATAAGGAGGATGCCACTGGAA
5260014	0.000443687	2.27467e-05	-2.0081	-1.00583	down	CDKN3	1033	Homo sapiens cyclin-dependent kinase inhibitor 3 (CDK2-associated dual specificity phosphatase) (CDKN3), mRNA,	chr14	53948082	53948131	CGCAGATGGAGGGACTCCTGACATAGCCAGCTGCTGTGAAATAATGGAAG
430553	0.000427678	2.14408e-05	-2.00799	-1.00575	down	DCTN6	10671	Homo sapiens dynactin 6 (DCTN6), mRNA,	chr8	30038121	30040614	GTCGGGTGCAGACTGAGCGACCGCAGCCCCAGACACTACAGCTGGATTTC
650347	0.00292943	0.000364537	-2.00792	-1.0057	down	NUDT1	4521	Homo sapiens nudix (nucleoside diphosphate linked moiety X)-type motif 1 (NUDT1), transcript variant 2A, mRNA,	chr7	2257112	2257161	GGTCAGGACACCATCCTGGACTACACACTCCGCGAGGTGGACACGGTCTA
6280646	7.67036e-05	1.12273e-06	-2.00788	-1.00568	down	LOC100133662	100133662	PREDICTED: Homo sapiens hypothetical protein LOC100133662 (LOC100133662), mRNA,				AGGGAATGTCTTCCTCTGATCGTCTTCCTCAGGAATAGACTCAAGTATGC
4150048	0.0001486	3.8039e-06	-2.0068	-1.00489	down	FABP5	2171	Homo sapiens fatty acid binding protein 5 (psoriasis-associated) (FABP5), mRNA,	chr8	82192820	82192869	GCCCGCACCCACCATGGCCACAGTTCAGCAGCTGGAAGGAAGATGGCGCC
1660703	0.00214359	0.000231725	-2.0061	-1.00439	down	MGC72080	389538	Homo sapiens MGC72080 pseudogene (MGC72080) on chromosome 7,	chr7	97434195	97436271	GCAGTGCTACAGCATGTACAAGAAGTCTCAGGGGATCCAGAACTGCAGCC
4210192	0.000141538	3.54285e-06	-2.00598	-1.00431	down	DCTPP1	79077	Homo sapiens dCTP pyrophosphatase 1 (DCTPP1), mRNA,	chr16	30435125	30435174	TAGAGATTGAAGGCTGTAAGAGTCCAGATGGTGGAGCCAGGCTGTCTGGG
7400719	3.84295e-05	2.77147e-07	-2.00567	-1.00408	down	EXOSC1	51013	Homo sapiens exosome component 1 (EXOSC1), mRNA, XM_944315 XM_944318 XM_944323	chr10	99196160	99195709	ACACCAAGATGCTGCTGTCTTTATTCAAACACCTGGCGTCGGCCAACAGC
2140242	0.00221308	0.000243788	-2.00349	-1.00251	down	TNFAIP6	7130	Homo sapiens tumor necrosis factor, alpha-induced protein 6 (TNFAIP6), mRNA,	chr2	151934982	151938331	CGATGATGTCCATGGCTTTGTGGGAAGATACTGTGGAGATGAGCTTCCAG
4280189	0.00015077	3.9051e-06	-2.00257	-1.00185	down	LOC653557	653557	PREDICTED: Homo sapiens hypothetical LOC653557 (LOC653557), mRNA,	chr16	33412088	33417187	CCGGCGCAGGCCCAGGCTCCACTCCCCAGCTGTGAAAGGAGGAGCTCTAT
6520661	7.99731e-05	1.2164e-06	-2.00098	-1.00071	down	C9orf46	55848	Homo sapiens chromosome 9 open reading frame 46 (C9orf46), mRNA,	chr9	5421982	5426616	GCCAGCCTTCCTGGTCCCGATTGTTCCATTAAGCTTTATCCTCACCTACC
7160088	2.35251e-05	9.67528e-08	-2.00067	-1.00048	down	TMEM14D	645203	PREDICTED: Homo sapiens transmembrane protein 14D (TMEM14D), mRNA,	chr10	69974402	69974451	GCCGGCGTGGGTGCTTACCAGCTGTATCAGGATCCAAGGAATGTTTGGGA
6510156	0.000501827	2.73999e-05	-2.00041	-1.00029	down	SNORA12	677800	Homo sapiens small nucleolar RNA, H/ACA box 12 (SNORA12), small nucleolar RNA,	chr10	101996916	101996965	GACGGAGATATCTCTCTTAAGCCTTTCCTGCATCAGAGAATGGCTCCCAC
