# Supplementary material for: Selective MicroRNA-Offset RNA Expression in Human Embryonic Stem Cells
Source: PLoS One. 2015 Mar 30;10(3):e0116668. doi: 10.1371/journal.pone.0116668 (PMC4378994; doi:10.1371/journal.pone.0116668)
Supplement: S6 Table — (XLSX) [file pone.0116668.s006.xlsx]

## Sheet: 45 common genes up
ProbeID	Symbol	Entrez_Gene_ID	Definition
380327	LOC730820	730820	PREDICTED: Homo sapiens similar to nuclear receptor binding factor 2 (LOC730820), mRNA.
4390703	PTPN1	5770	Homo sapiens protein tyrosine phosphatase, non-receptor type 1 (PTPN1), mRNA.
5390661	VLDLR	7436	Homo sapiens very low density lipoprotein receptor (VLDLR), transcript variant 2, mRNA.
1510736	KLC1	3831	Homo sapiens kinesin light chain 1 (KLC1), transcript variant 1, mRNA.
4860239	WDR1	9948	Homo sapiens WD repeat domain 1 (WDR1), transcript variant 1, mRNA.
1990253	TDG	6996	Homo sapiens thymine-DNA glycosylase (TDG), mRNA.
5860463	NEK6	10783	Homo sapiens NIMA (never in mitosis gene a)-related kinase 6 (NEK6), mRNA.
5290592	NRBF2	29982	Homo sapiens nuclear receptor binding factor 2 (NRBF2), mRNA.
6250154	LZTFL1	54585	Homo sapiens leucine zipper transcription factor-like 1 (LZTFL1), mRNA.
3440133	RNF150	57484	Homo sapiens ring finger protein 150 (RNF150), mRNA.
3400458	MSRB3	253827	Homo sapiens methionine sulfoxide reductase B3 (MSRB3), transcript variant 1, mRNA.
4780086	CRK	1398	Homo sapiens v-crk sarcoma virus CT10 oncogene homolog (avian) (CRK), transcript variant II, mRNA.
7040014	CRK	1398	Homo sapiens v-crk sarcoma virus CT10 oncogene homolog (avian) (CRK), transcript variant II, mRNA.
3360431	ZAK	51776	Homo sapiens sterile alpha motif and leucine zipper containing kinase AZK (ZAK), transcript variant 1, mRNA.
1340360	RCC2	55920	Homo sapiens regulator of chromosome condensation 2 (RCC2), mRNA.
4060068	PDIA4	9601	Homo sapiens protein disulfide isomerase family A, member 4 (PDIA4), mRNA.
2230615	WSB1	26118	Homo sapiens WD repeat and SOCS box-containing 1 (WSB1), transcript variant 2, mRNA.
4040519	LOC728059	728059	PREDICTED: Homo sapiens misc_RNA (LOC728059), miscRNA.
620180	STAG2	10735	Homo sapiens stromal antigen 2 (STAG2), transcript variant 2, mRNA.
7200243	SERPINB7	8710	Homo sapiens serpin peptidase inhibitor, clade B (ovalbumin), member 7 (SERPINB7), transcript variant 1, mRNA.
6060201	DDX18	8886	Homo sapiens DEAD (Asp-Glu-Ala-Asp) box polypeptide 18 (DDX18), mRNA.
780259	ZNHIT6	54680	Homo sapiens zinc finger, HIT type 6 (ZNHIT6), mRNA.
150681	ZNHIT6	54680	Homo sapiens zinc finger, HIT type 6 (ZNHIT6), mRNA.
5820343	ERCC5	2073	Homo sapiens excision repair cross-complementing rodent repair deficiency, complementation group 5 (ERCC5), mRNA.
1300470	MAMDC2	256691	Homo sapiens MAM domain containing 2 (MAMDC2), mRNA.
4670059	ZAK	51776	Homo sapiens sterile alpha motif and leucine zipper containing kinase AZK (ZAK), transcript variant 2, mRNA.
2900731	PCSK7	9159	Homo sapiens proprotein convertase subtilisin/kexin type 7 (PCSK7), mRNA.
6520066	VAMP7	6845	Homo sapiens vesicle-associated membrane protein 7 (VAMP7), mRNA.
2350703	STX3	6809	Homo sapiens syntaxin 3 (STX3), mRNA.
2450114			Homo sapiens cDNA FLJ32401 fis, clone SKMUS2000339
770221	C20orf177	63939	Homo sapiens chromosome 20 open reading frame 177 (C20orf177), mRNA.
3930452	CDC2L6	23097	Homo sapiens cell division cycle 2-like 6 (CDK8-like) (CDC2L6), mRNA.
7400372	WSB1	26118	Homo sapiens WD repeat and SOCS box-containing 1 (WSB1), transcript variant 3, mRNA.
3460707	STMN1	3925	Homo sapiens stathmin 1 (STMN1), transcript variant 1, mRNA.
270053	GABPA	2551	Homo sapiens GA binding protein transcription factor, alpha subunit 60kDa (GABPA), mRNA.
4280482	DRAM1	55332	Homo sapiens DNA-damage regulated autophagy modulator 1 (DRAM1), mRNA.
5340768	NGRN	51335	Homo sapiens neugrin, neurite outgrowth associated (NGRN), transcript variant 1, mRNA.
2190603	PLS3	5358	Homo sapiens plastin 3 (T isoform) (PLS3), mRNA.
2810615	GRB10	2887	Homo sapiens growth factor receptor-bound protein 10 (GRB10), transcript variant 4, mRNA.
1170445	CADM1	23705	Homo sapiens cell adhesion molecule 1 (CADM1), transcript variant 1, mRNA.
6580364	NEK7	140609	Homo sapiens NIMA (never in mitosis gene a)-related kinase 7 (NEK7), mRNA.
4860066	LOC647346	647346	PREDICTED: Homo sapiens similar to Alcohol dehydrogenase class 3 chi chain (Alcohol dehydrogenase class III chi chain) (S-(hydroxymethyl)glutathione dehydrogenase) (Glutathione-dependent formaldehyde dehydrogenase) (FDH), transcript variant 1 (LOC647346), mRNA.
6290112	SRPR	6734	Homo sapiens signal recognition particle receptor (docking protein) (SRPR), mRNA.
5720161	ADH5	128	Homo sapiens alcohol dehydrogenase 5 (class III), chi polypeptide (ADH5), mRNA.
4150037	G3BP2	9908	Homo sapiens GTPase activating protein (SH3 domain) binding protein 2 (G3BP2), transcript variant 3, mRNA.

## Sheet: DAVID GOs common up 
gene list: 45 miR and moR common genes up		GO:s mentioned in the manuscript highlighted!
Functional Annotation Clustering
Current Background: Homo sapiens
37/45 genes recognized by DAVID
Statistical test: a modified Fisher Exact P-Value (EASE score)
11 Cluster(s)
Annotation Cluster 1	Enrichment Score: 1.22		Count	P_Value	Benjamini
	GOTERM_CC_FAT	lytic vacuole	3	5.5E-2	8.1E-1
	GOTERM_CC_FAT	lysosome	3	5.5E-2	8.1E-1
	GOTERM_CC_FAT	vacuole	3	7.5E-2	7.8E-1
Annotation Cluster 2	Enrichment Score: 1.03		Count	P_Value	Benjamini
	GOTERM_BP_FAT	cellular response to insulin stimulus	3	1.1E-2	9.9E-1
	GOTERM_BP_FAT	response to insulin stimulus	3	2.3E-2	9.9E-1
	GOTERM_BP_FAT	cellular response to hormone stimulus	3	3.9E-2	9.9E-1
	GOTERM_BP_FAT	response to peptide hormone stimulus	3	5.1E-2	9.6E-1
	GOTERM_BP_FAT	response to hormone stimulus	3	2.2E-1	1.0E0
	GOTERM_BP_FAT	response to organic substance	4	2.4E-1	1.0E0
	GOTERM_BP_FAT	response to endogenous stimulus	3	2.5E-1	9.9E-1
	GOTERM_CC_FAT	plasma membrane	6	8.5E-1	1.0E0
Annotation Cluster 3	Enrichment Score: 0.92		Count	P_Value	Benjamini
	GOTERM_BP_FAT	cell division	4	3.2E-2	9.9E-1
	GOTERM_BP_FAT	M phase	4	4.2E-2	9.7E-1
	GOTERM_BP_FAT	cell cycle process	5	4.3E-2	9.6E-1
	GOTERM_BP_FAT	mitotic cell cycle	4	5.6E-2	9.5E-1
	GOTERM_BP_FAT	cell cycle phase	4	7.3E-2	9.7E-1
	GOTERM_CC_FAT	microtubule	3	8.6E-2	7.3E-1
	GOTERM_BP_FAT	nuclear division	3	9.5E-2	9.9E-1
	GOTERM_BP_FAT	mitosis	3	9.5E-2	9.9E-1
	GOTERM_BP_FAT	M phase of mitotic cell cycle	3	9.8E-2	9.8E-1
	GOTERM_BP_FAT	organelle fission	3	1.0E-1	9.8E-1
	GOTERM_BP_FAT	cell cycle	5	1.1E-1	9.8E-1
	GOTERM_CC_FAT	cytoskeleton	5	2.3E-1	8.9E-1
	GOTERM_CC_FAT	microtubule cytoskeleton	3	2.6E-1	9.0E-1
	GOTERM_CC_FAT	non-membrane-bounded organelle	6	5.1E-1	9.7E-1
	GOTERM_CC_FAT	intracellular non-membrane-bounded organelle	6	5.1E-1	9.7E-1
	GOTERM_CC_FAT	cytoskeletal part	3	5.2E-1	9.7E-1
Annotation Cluster 4	Enrichment Score: 0.9		Count	P_Value	Benjamini
	GOTERM_CC_FAT	cytoplasmic vesicle	6	5.0E-3	4.4E-1
	GOTERM_CC_FAT	vesicle	6	6.0E-3	3.0E-1
	GOTERM_CC_FAT	endoplasmic reticulum	6	2.6E-2	6.4E-1
	GOTERM_CC_FAT	cytoplasmic membrane-bounded vesicle	4	7.4E-2	8.4E-1
	GOTERM_CC_FAT	membrane-bounded vesicle	4	8.0E-2	7.5E-1
	GOTERM_CC_FAT	neuron projection	3	1.3E-1	8.2E-1
	GOTERM_CC_FAT	cell fraction	5	1.3E-1	7.9E-1
	GOTERM_CC_FAT	endoplasmic reticulum part	3	1.3E-1	7.7E-1
	GOTERM_BP_FAT	protein localization	5	1.5E-1	9.9E-1
	GOTERM_CC_FAT	insoluble fraction	4	1.9E-1	8.5E-1
	GOTERM_BP_FAT	intracellular transport	4	2.0E-1	1.0E0
	GOTERM_BP_FAT	protein transport	4	2.7E-1	1.0E0
	GOTERM_BP_FAT	establishment of protein localization	4	2.7E-1	9.9E-1
	GOTERM_CC_FAT	cell projection	3	3.6E-1	9.6E-1
	GOTERM_CC_FAT	membrane fraction	3	4.3E-1	9.7E-1
	GOTERM_CC_FAT	plasma membrane	6	8.5E-1	1.0E0
	GOTERM_CC_FAT	plasma membrane part	3	9.3E-1	1.0E0
Annotation Cluster 5	Enrichment Score: 0.9		Count	P_Value	Benjamini
	GOTERM_MF_FAT	identical protein binding	5	4.2E-2	1.0E0
	GOTERM_MF_FAT	protein homodimerization activity	3	1.5E-1	9.7E-1
	GOTERM_MF_FAT	protein dimerization activity	3	3.1E-1	9.8E-1
Annotation Cluster 6	Enrichment Score: 0.67		Count	P_Value	Benjamini
	GOTERM_MF_FAT	protein tyrosine kinase activity	3	4.6E-2	9.6E-1
	GOTERM_MF_FAT	protein serine/threonine kinase activity	4	5.9E-2	9.3E-1
	GOTERM_MF_FAT	magnesium ion binding	4	6.6E-2	9.0E-1
	GOTERM_MF_FAT	protein kinase activity	4	1.3E-1	9.7E-1
	GOTERM_MF_FAT	nucleotide binding	8	1.7E-1	9.7E-1
	GOTERM_BP_FAT	phosphorus metabolic process	5	2.0E-1	1.0E0
	GOTERM_BP_FAT	phosphate metabolic process	5	2.0E-1	1.0E0
	GOTERM_BP_FAT	protein amino acid phosphorylation	4	2.1E-1	1.0E0
	GOTERM_BP_FAT	phosphorylation	4	2.9E-1	9.9E-1
	GOTERM_MF_FAT	ribonucleotide binding	6	3.3E-1	9.8E-1
	GOTERM_MF_FAT	purine ribonucleotide binding	6	3.3E-1	9.8E-1
	GOTERM_MF_FAT	purine nucleotide binding	6	3.7E-1	9.9E-1
	GOTERM_MF_FAT	ATP binding	5	3.7E-1	9.8E-1
	GOTERM_MF_FAT	adenyl ribonucleotide binding	5	3.8E-1	9.8E-1
	GOTERM_MF_FAT	adenyl nucleotide binding	5	4.2E-1	9.9E-1
	GOTERM_MF_FAT	purine nucleoside binding	5	4.3E-1	9.8E-1
	GOTERM_MF_FAT	nucleoside binding	5	4.4E-1	9.8E-1
Annotation Cluster 7	Enrichment Score: 0.64		Count	P_Value	Benjamini
	GOTERM_MF_FAT	metal ion binding	12	2.1E-1	9.8E-1
	GOTERM_MF_FAT	cation binding	12	2.2E-1	9.8E-1
	GOTERM_MF_FAT	ion binding	12	2.4E-1	9.7E-1
Annotation Cluster 8	Enrichment Score: 0.52		Count	P_Value	Benjamini
	GOTERM_MF_FAT	identical protein binding	5	4.2E-2	1.0E0
	GOTERM_BP_FAT	regulation of apoptosis	3	5.7E-1	1.0E0
	GOTERM_BP_FAT	regulation of programmed cell death	3	5.8E-1	1.0E0
	GOTERM_BP_FAT	regulation of cell death	3	5.8E-1	1.0E0
Annotation Cluster 9	Enrichment Score: 0.49		Count	P_Value	Benjamini
	GOTERM_BP_FAT	cell death	4	2.4E-1	1.0E0
	GOTERM_BP_FAT	death	4	2.4E-1	9.9E-1
	GOTERM_BP_FAT	apoptosis	3	4.2E-1	1.0E0
	GOTERM_BP_FAT	programmed cell death	3	4.3E-1	1.0E0
Annotation Cluster 10	Enrichment Score: 0.32		Count	P_Value	Benjamini
	GOTERM_CC_FAT	endomembrane system	4	1.6E-1	8.2E-1
	GOTERM_CC_FAT	integral to membrane	9	8.0E-1	1.0E0
	GOTERM_CC_FAT	intrinsic to membrane	9	8.4E-1	1.0E0
Annotation Cluster 11	Enrichment Score: 0.29		Count	P_Value	Benjamini
	GOTERM_CC_FAT	intracellular organelle lumen	5	4.0E-1	9.7E-1
	GOTERM_CC_FAT	organelle lumen	5	4.2E-1	9.7E-1
	GOTERM_CC_FAT	membrane-enclosed lumen	5	4.3E-1	9.6E-1
	GOTERM_CC_FAT	nuclear lumen	4	4.9E-1	9.7E-1
	GOTERM_MF_FAT	DNA binding	3	9.7E-1	1.0E0

## Sheet: 353 common genes down
ProbeID	Symbol	Entrez_Gene_ID	Definition
2570463	LOC728492	728492	PREDICTED: Homo sapiens similar to small EDRK-rich factor 1A, telomeric, transcript variant 4 (LOC728492), mRNA.
7320187	DCTN3	11258	Homo sapiens dynactin 3 (p22) (DCTN3), transcript variant 1, mRNA.
1240482	LAGE3	8270	Homo sapiens L antigen family, member 3 (LAGE3), mRNA.
160612	MGLL	11343	Homo sapiens monoglyceride lipase (MGLL), transcript variant 1, mRNA.
520468	LOC402175	402175	PREDICTED: Homo sapiens misc_RNA (LOC402175), miscRNA.
240546	SCAND1	51282	Homo sapiens SCAN domain containing 1 (SCAND1), transcript variant 2, mRNA.
5090414	MRPL40	64976	Homo sapiens mitochondrial ribosomal protein L40 (MRPL40), nuclear gene encoding mitochondrial protein, mRNA.
4200110	GTF3C6	112495	Homo sapiens general transcription factor IIIC, polypeptide 6, alpha 35kDa (GTF3C6), mRNA.
5080367	CKLF	51192	Homo sapiens chemokine-like factor (CKLF), transcript variant 5, mRNA.
6130332	UCRC	29796	Homo sapiens ubiquinol-cytochrome c reductase complex (7.2 kD) (UCRC), transcript variant 2, mRNA.
3800079	C19orf56	51398	Homo sapiens chromosome 19 open reading frame 56 (C19orf56), mRNA.
70167	LY96	23643	Homo sapiens lymphocyte antigen 96 (LY96), mRNA.
2630195	VAMP5	10791	Homo sapiens vesicle-associated membrane protein 5 (myobrevin) (VAMP5), mRNA.
4560717	MDK	4192	Homo sapiens midkine (neurite growth-promoting factor 2) (MDK), transcript variant 1, mRNA.
150131	UXT	8409	Homo sapiens ubiquitously-expressed transcript (UXT), transcript variant 2, mRNA.
130673	NHP2	55651	Homo sapiens NHP2 ribonucleoprotein homolog (yeast) (NHP2), transcript variant 1, mRNA.
6770343	ETFB	2109	Homo sapiens electron-transfer-flavoprotein, beta polypeptide (ETFB), transcript variant 2, mRNA.
110682	S100A11	6282	Homo sapiens S100 calcium binding protein A11 (S100A11), mRNA.
1450477	SIVA1	10572	Homo sapiens SIVA1, apoptosis-inducing factor (SIVA1), transcript variant 2, mRNA.
7210035	SNORD13	692084	Homo sapiens small nucleolar RNA, C/D box 13 (SNORD13), small nucleolar RNA.
990615	MTCP1	4515	Homo sapiens mature T-cell proliferation 1 (MTCP1), nuclear gene encoding mitochondrial protein, transcript variant B1, mRNA.
5090484	LOC389342	389342	PREDICTED: Homo sapiens similar to QM protein, transcript variant 11 (LOC389342), mRNA.
1580427	THEM2	55856	Homo sapiens thioesterase superfamily member 2 (THEM2), mRNA.
6660193	NDUFB9	4715	Homo sapiens NADH dehydrogenase (ubiquinone) 1 beta subcomplex, 9, 22kDa (NDUFB9), mRNA.
7610593	TRAPPC5	126003	Homo sapiens trafficking protein particle complex 5 (TRAPPC5), transcript variant 3, mRNA.
20435	LOC729279	729279	PREDICTED: Homo sapiens misc_RNA (LOC729279), miscRNA.
2480338	DBI	1622	Homo sapiens diazepam binding inhibitor (GABA receptor modulator, acyl-Coenzyme A binding protein) (DBI), mRNA.
160255	LSM10	84967	Homo sapiens LSM10, U7 small nuclear RNA associated (LSM10), mRNA.
7570630	PEG10	23089	Homo sapiens paternally expressed 10 (PEG10), transcript variant 1, mRNA. XM_940378
2450255	LOC391532	391532	PREDICTED: Homo sapiens misc_RNA (LOC391532), miscRNA.
6860687	PYCARD	29108	Homo sapiens PYD and CARD domain containing (PYCARD), transcript variant 1, mRNA.
3830746	UQCRB	7381	Homo sapiens ubiquinol-cytochrome c reductase binding protein (UQCRB), mRNA.
1340400	C6orf129	154467	Homo sapiens chromosome 6 open reading frame 129 (C6orf129), mRNA.
4540349	LSM2	57819	Homo sapiens LSM2 homolog, U6 small nuclear RNA associated (S. cerevisiae) (LSM2), mRNA.
3120707	CUTA	51596	Homo sapiens cutA divalent cation tolerance homolog (E. coli) (CUTA), transcript variant 5, mRNA.
3710725	ATP5E	514	Homo sapiens ATP synthase, H+ transporting, mitochondrial F1 complex, epsilon subunit (ATP5E), nuclear gene encoding mitochondrial protein, mRNA.
1980600	LOC645058	645058	PREDICTED: Homo sapiens similar to hepatitis B virus x-interacting protein (LOC645058), mRNA.
610376	NUDCD2	134492	Homo sapiens NudC domain containing 2 (NUDCD2), mRNA.
7320722	LOC727984	727984	PREDICTED: Homo sapiens misc_RNA (LOC727984), miscRNA.
4780689	MRPL51	51258	Homo sapiens mitochondrial ribosomal protein L51 (MRPL51), nuclear gene encoding mitochondrial protein, mRNA.
2260168	LOC731640	731640	PREDICTED: Homo sapiens similar to 60S ribosomal protein L21, transcript variant 2 (LOC731640), mRNA.
2690561	RPLP1	6176	Homo sapiens ribosomal protein, large, P1 (RPLP1), transcript variant 1, mRNA.
6380187	C21orf57	54059	Homo sapiens chromosome 21 open reading frame 57 (C21orf57), transcript variant 1, mRNA.
6760414	C19orf60	55049	Homo sapiens chromosome 19 open reading frame 60 (C19orf60), transcript variant 2, mRNA.
650735	LOC100131205	100131205	PREDICTED: Homo sapiens hypothetical protein LOC100131205, transcript variant 3 (LOC100131205), mRNA.
1240152	CFD	1675	Homo sapiens complement factor D (adipsin) (CFD), mRNA.
5390411	PHPT1	29085	Homo sapiens phosphohistidine phosphatase 1 (PHPT1), mRNA.
6660270	MRPL17	63875	Homo sapiens mitochondrial ribosomal protein L17 (MRPL17), nuclear gene encoding mitochondrial protein, mRNA.
6280224	CYP26B1	56603	Homo sapiens cytochrome P450, family 26, subfamily B, polypeptide 1 (CYP26B1), mRNA.
2070564	TOMM6	100188893	Homo sapiens translocase of outer mitochondrial membrane 6 homolog (yeast) (TOMM6), nuclear gene encoding mitochondrial protein, mRNA.
5290220	LOC100129599	100129599	PREDICTED: Homo sapiens similar to mCG7602 (LOC100129599), mRNA.
150100	S100A3	6274	Homo sapiens S100 calcium binding protein A3 (S100A3), mRNA.
4560246	ATP5I	521	Homo sapiens ATP synthase, H+ transporting, mitochondrial F0 complex, subunit E (ATP5I), nuclear gene encoding mitochondrial protein, mRNA.
3440338	RNF181	51255	Homo sapiens ring finger protein 181 (RNF181), mRNA.
5570110	TRIOBP	11078	Homo sapiens TRIO and F-actin binding protein (TRIOBP), transcript variant 6, mRNA.
2320672	LOC728820	728820	PREDICTED: Homo sapiens misc_RNA (LOC728820), miscRNA.
4560669	LOC728820	728820	PREDICTED: Homo sapiens misc_RNA (LOC728820), miscRNA.
5720520	SNHG6	641638	Homo sapiens small nucleolar RNA host gene 6 (non-protein coding) (SNHG6), non-coding RNA.
4760431	LOC136143	136143	PREDICTED: Homo sapiens similar to ribosomal protein L18 (LOC136143), mRNA.
1510452	C8orf59	401466	Homo sapiens chromosome 8 open reading frame 59 (C8orf59), transcript variant 3, mRNA.
380541	PPPDE2	27351	Homo sapiens PPPDE peptidase domain containing 2 (PPPDE2), mRNA.
5360156	IFITM1	8519	Homo sapiens interferon induced transmembrane protein 1 (9-27) (IFITM1), mRNA.
1230348	CARHSP1	23589	Homo sapiens calcium regulated heat stable protein 1, 24kDa (CARHSP1), transcript variant 2, mRNA.
6130259	LOC402644	402644	PREDICTED: Homo sapiens similar to peptidylprolyl isomerase A isoform 1 (LOC402644), mRNA.
1570370	HINT2	84681	Homo sapiens histidine triad nucleotide binding protein 2 (HINT2), mRNA.
4890270	LY6E	4061	Homo sapiens lymphocyte antigen 6 complex, locus E (LY6E), mRNA.
7510315	HIGD2A	192286	Homo sapiens HIG1 hypoxia inducible domain family, member 2A (HIGD2A), mRNA.
7550722	ZMYM6	9204	Homo sapiens zinc finger, MYM-type 6 (ZMYM6), mRNA.
6220441	CISD1	55847	Homo sapiens CDGSH iron sulfur domain 1 (CISD1), mRNA.
20392	CISD1	55847	Homo sapiens CDGSH iron sulfur domain 1 (CISD1), mRNA.
2750066	LOC100132499	100132499	PREDICTED: Homo sapiens similar to mCG7602 (LOC100132499), mRNA.
5310241	TOMM5	401505	Homo sapiens translocase of outer mitochondrial membrane 5 homolog (yeast) (TOMM5), nuclear gene encoding mitochondrial protein, transcript variant 1, mRNA.
2340521	C17orf61	254863	Homo sapiens chromosome 17 open reading frame 61 (C17orf61), mRNA.
2640411	UNC84B	25777	Homo sapiens unc-84 homolog B (C. elegans) (UNC84B), mRNA.
3710039	MRPL54	116541	Homo sapiens mitochondrial ribosomal protein L54 (MRPL54), nuclear gene encoding mitochondrial protein, mRNA.
4760450	C16orf33	79622	Homo sapiens chromosome 16 open reading frame 33 (C16orf33), mRNA.
5260014	CDKN3	1033	Homo sapiens cyclin-dependent kinase inhibitor 3 (CDK2-associated dual specificity phosphatase) (CDKN3), mRNA.
6960373	LOC644191	644191	PREDICTED: Homo sapiens similar to hCG15685, transcript variant 1 (LOC644191), mRNA.
3130379	STX8	9482	Homo sapiens syntaxin 8 (STX8), mRNA.
450598	PHF5A	84844	Homo sapiens PHD finger protein 5A (PHF5A), mRNA.
7100066	POLR2G	5436	Homo sapiens polymerase (RNA) II (DNA directed) polypeptide G (POLR2G), mRNA.
5550113	LOC729340	729340	PREDICTED: Homo sapiens misc_RNA (LOC729340), miscRNA.
580626	LOC100129657	100129657	PREDICTED: Homo sapiens hypothetical protein LOC100129657 (LOC100129657), mRNA.
5090215	IFI6	2537	Homo sapiens interferon, alpha-inducible protein 6 (IFI6), transcript variant 3, mRNA.
830484	LOC441377	441377	PREDICTED: Homo sapiens similar to 40S ribosomal protein S26 (LOC441377), mRNA.
5130241	PPIH	10465	Homo sapiens peptidylprolyl isomerase H (cyclophilin H) (PPIH), mRNA.
3460184	C19orf53	28974	Homo sapiens chromosome 19 open reading frame 53 (C19orf53), mRNA.
5090050	NDUFA12	55967	Homo sapiens NADH dehydrogenase (ubiquinone) 1 alpha subcomplex, 12 (NDUFA12), mRNA.
4670424	MRPL11	65003	Homo sapiens mitochondrial ribosomal protein L11 (MRPL11), nuclear gene encoding mitochondrial protein, transcript variant 1, mRNA.
1820543	ZNF428	126299	Homo sapiens zinc finger protein 428 (ZNF428), mRNA.
6510156	SNORA12	677800	Homo sapiens small nucleolar RNA, H/ACA box 12 (SNORA12), small nucleolar RNA.
3990598	DRAP1	10589	Homo sapiens DR1-associated protein 1 (negative cofactor 2 alpha) (DRAP1), mRNA.
650605	LOC388789	388789	PREDICTED: Homo sapiens hypothetical gene supported by AF147354 (LOC388789), mRNA.
1940180	PSMB9	5698	Homo sapiens proteasome (prosome, macropain) subunit, beta type, 9 (large multifunctional peptidase 2) (PSMB9), transcript variant 1, mRNA.
5310411	H2AFJ	55766	Homo sapiens H2A histone family, member J (H2AFJ), transcript variant 1, mRNA.
6060719	RPL39L	116832	Homo sapiens ribosomal protein L39-like (RPL39L), mRNA.
2850142	LOC100129650	100129650	PREDICTED: Homo sapiens misc_RNA (LOC100129650), miscRNA.
4760112	ATP5J2	9551	Homo sapiens ATP synthase, H+ transporting, mitochondrial F0 complex, subunit F2 (ATP5J2), nuclear gene encoding mitochondrial protein, transcript variant 3, mRNA.
5420377	LGALS3	3958	Homo sapiens lectin, galactoside-binding, soluble, 3 (galectin 3) (LGALS3), mRNA.
4180431	LOC205251	205251	PREDICTED: Homo sapiens misc_RNA (LOC205251), miscRNA.
7210484	C6orf108	10591	Homo sapiens chromosome 6 open reading frame 108 (C6orf108), transcript variant 2, mRNA.
4560367	NDUFA8	4702	Homo sapiens NADH dehydrogenase (ubiquinone) 1 alpha subcomplex, 8, 19kDa (NDUFA8), nuclear gene encoding mitochondrial protein, mRNA.
2680767	MRPS24	64951	Homo sapiens mitochondrial ribosomal protein S24 (MRPS24), nuclear gene encoding mitochondrial protein, mRNA.
4150615	LOC100132673	100132673	PREDICTED: Homo sapiens misc_RNA (LOC100132673), miscRNA.
6280446	LOC642989	642989	PREDICTED: Homo sapiens similar to 40S ribosomal protein S25 (LOC642989), mRNA.
460114	SNRPF	6636	Homo sapiens small nuclear ribonucleoprotein polypeptide F (SNRPF), mRNA.
1940274	IFI27L2	83982	Homo sapiens interferon, alpha-inducible protein 27-like 2 (IFI27L2), mRNA.
6940561	IFI27L2	83982	Homo sapiens interferon, alpha-inducible protein 27-like 2 (IFI27L2), mRNA.
2260576	COX7B	1349	Homo sapiens cytochrome c oxidase subunit VIIb (COX7B), nuclear gene encoding mitochondrial protein, mRNA.
5720102	C7orf55	154791	Homo sapiens chromosome 7 open reading frame 55 (C7orf55), nuclear gene encoding mitochondrial protein, mRNA.
4590615	C7orf59	389541	Homo sapiens chromosome 7 open reading frame 59 (C7orf59), mRNA.
4260441	CLEC3B	7123	Homo sapiens C-type lectin domain family 3, member B (CLEC3B), mRNA.
1010347	POLR2I	5438	Homo sapiens polymerase (RNA) II (DNA directed) polypeptide I, 14.5kDa (POLR2I), mRNA.
3930392	ANG	283	Homo sapiens angiogenin, ribonuclease, RNase A family, 5 (ANG), transcript variant 2, mRNA.
6250576	MRPL21	219927	Homo sapiens mitochondrial ribosomal protein L21 (MRPL21), nuclear gene encoding mitochondrial protein, transcript variant 1, mRNA.
6520576	BOLA3	388962	Homo sapiens bolA homolog 3 (E. coli) (BOLA3), transcript variant 1, mRNA.
2470484	RNASEK	440400	Homo sapiens ribonuclease, RNase K (RNASEK), mRNA.
2320291	MGC87895	644068	PREDICTED: Homo sapiens similar to ribosomal protein S14 (MGC87895), mRNA.
6270605	LOC649946	649946	Homo sapiens ribosomal protein L23a pseudogene (LOC649946), non-coding RNA.
6860653	HBXIP	10542	Homo sapiens hepatitis B virus x interacting protein (HBXIP), mRNA.
2650564	RARRES3	5920	Homo sapiens retinoic acid receptor responder (tazarotene induced) 3 (RARRES3), mRNA.
4150458	RPA3	6119	Homo sapiens replication protein A3, 14kDa (RPA3), mRNA.
1570725	APOA1BP	128240	Homo sapiens apolipoprotein A-I binding protein (APOA1BP), mRNA.
3870470	LOC728973	728973	PREDICTED: Homo sapiens similar to 40S ribosomal protein S7 (S8) (LOC728973), mRNA.
4560528	POP5	51367	Homo sapiens processing of precursor 5, ribonuclease P/MRP subunit (S. cerevisiae) (POP5), transcript variant 3, mRNA.
2680612	LOC389156	389156	PREDICTED: Homo sapiens misc_RNA (LOC389156), miscRNA.
2060646	MRPL20	55052	Homo sapiens mitochondrial ribosomal protein L20 (MRPL20), nuclear gene encoding mitochondrial protein, mRNA.
2750309	MRPL53	116540	Homo sapiens mitochondrial ribosomal protein L53 (MRPL53), nuclear gene encoding mitochondrial protein, mRNA.
2360082	LOC100134537	100134537	PREDICTED: Homo sapiens misc_RNA (LOC100134537), miscRNA.
6130390	RPL26L1	51121	Homo sapiens ribosomal protein L26-like 1 (RPL26L1), mRNA.
4480600	C20orf127	140851	Homo sapiens chromosome 20 open reading frame 127 (C20orf127), mRNA.
3420671	TRAPPC1	58485	Homo sapiens trafficking protein particle complex 1 (TRAPPC1), mRNA.
3360093	COMMD1	150684	Homo sapiens copper metabolism (Murr1) domain containing 1 (COMMD1), mRNA.
7160088	TMEM14D	645203	PREDICTED: Homo sapiens transmembrane protein 14D (TMEM14D), mRNA.
130603	DYNLRB1	83658	Homo sapiens dynein, light chain, roadblock-type 1 (DYNLRB1), mRNA.
7210224	DYNLRB1	83658	Homo sapiens dynein, light chain, roadblock-type 1 (DYNLRB1), mRNA.
4780047	DYNLRB1	83658	Homo sapiens dynein, light chain, roadblock-type 1 (DYNLRB1), mRNA.
6580369	DYNLRB1	83658	Homo sapiens dynein, light chain, roadblock-type 1 (DYNLRB1), mRNA.
7560215	LOC100129685	100129685	PREDICTED: Homo sapiens hypothetical protein LOC100129685 (LOC100129685), mRNA.
2760537	MTE	644314	Homo sapiens metallothionein E (MTE), mRNA.
4480356	LOC644928	644928	Homo sapiens hCG2033311 (LOC644928), mRNA.
7560092	TMEM126A	84233	Homo sapiens transmembrane protein 126A (TMEM126A), mRNA.
6450050	NDUFB6	4712	Homo sapiens NADH dehydrogenase (ubiquinone) 1 beta subcomplex, 6, 17kDa (NDUFB6), nuclear gene encoding mitochondrial protein, transcript variant 1, mRNA.
1010768	NDUFB6	4712	Homo sapiens NADH dehydrogenase (ubiquinone) 1 beta subcomplex, 6, 17kDa (NDUFB6), nuclear gene encoding mitochondrial protein, transcript variant 1, mRNA.
830768	FLJ43681	388574	PREDICTED: Homo sapiens similar to 60S ribosomal protein L23a (FLJ43681), miscRNA.
4260762	CHMP2A	27243	Homo sapiens chromatin modifying protein 2A (CHMP2A), transcript variant 1, mRNA.
2000445	PSMB10	5699	Homo sapiens proteasome (prosome, macropain) subunit, beta type, 10 (PSMB10), mRNA.
7150280	LOC145853	145853	PREDICTED: Homo sapiens hypothetical LOC145853 (LOC145853), mRNA.
4040026	LOC728590	728590	PREDICTED: Homo sapiens similar to rCG23287 (LOC728590), mRNA.
5690369	LOC100131205	100131205	PREDICTED: Homo sapiens hypothetical protein LOC100131205 (LOC100131205), mRNA.
5420301	LOC645979	645979	PREDICTED: Homo sapiens similar to ribosomal protein S26 (LOC645979), mRNA.
4890427	MRPL23	6150	Homo sapiens mitochondrial ribosomal protein L23 (MRPL23), nuclear gene encoding mitochondrial protein, mRNA.
2690338	RPS21	6227	Homo sapiens ribosomal protein S21 (RPS21), mRNA.
1980500	ZMAT2	153527	Homo sapiens zinc finger, matrin type 2 (ZMAT2), mRNA.
1050678	LOC100128060	100128060	PREDICTED: Homo sapiens similar to mCG19129, transcript variant 2 (LOC100128060), mRNA.
4200025	OAF	220323	Homo sapiens OAF homolog (Drosophila) (OAF), mRNA.
6290296	NDUFB7	4713	Homo sapiens NADH dehydrogenase (ubiquinone) 1 beta subcomplex, 7, 18kDa (NDUFB7), nuclear gene encoding mitochondrial protein, mRNA.
6250408	RPL12P6	440176	PREDICTED: Homo sapiens misc_RNA (RPL12P6), miscRNA.
3310228	C11orf67	28971	Homo sapiens chromosome 11 open reading frame 67 (C11orf67), mRNA.
2690400	MRPS17	51373	Homo sapiens mitochondrial ribosomal protein S17 (MRPS17), nuclear gene encoding mitochondrial protein, mRNA.
7610747	MRPL24	79590	Homo sapiens mitochondrial ribosomal protein L24 (MRPL24), nuclear gene encoding mitochondrial protein, transcript variant 1, mRNA.
3120139	NENF	29937	Homo sapiens neuron derived neurotrophic factor (NENF), mRNA.
4280189	LOC653557	653557	PREDICTED: Homo sapiens hypothetical LOC653557 (LOC653557), mRNA.
6840189	NDUFA2	4695	Homo sapiens NADH dehydrogenase (ubiquinone) 1 alpha subcomplex, 2, 8kDa (NDUFA2), mRNA.
6560577	HSPB3	8988	Homo sapiens heat shock 27kDa protein 3 (HSPB3), mRNA.
1820482	NDUFB10	4716	Homo sapiens NADH dehydrogenase (ubiquinone) 1 beta subcomplex, 10, 22kDa (NDUFB10), mRNA.
3140021	PCBD1	5092	Homo sapiens pterin-4 alpha-carbinolamine dehydratase/dimerization cofactor of hepatocyte nuclear factor 1 alpha (PCBD1), mRNA.
4760288	ANAPC11	51529	Homo sapiens anaphase promoting complex subunit 11 (ANAPC11), transcript variant 4, mRNA.
10220	ANAPC11	51529	Homo sapiens anaphase promoting complex subunit 11 (ANAPC11), transcript variant 4, mRNA.
4670048	RPS26L	400156	Homo sapiens 40S ribosomal protein S26-like (RPS26L), non-coding RNA.
1090500	LOC645166	645166	PREDICTED: Homo sapiens similar to lymphocyte-specific protein 1 (LOC645166), mRNA.
2370167	LOC100130154	100130154	PREDICTED: Homo sapiens similar to thymosin, beta 10 (LOC100130154), mRNA.
4290102	LOC644563	644563	PREDICTED: Homo sapiens misc_RNA (LOC644563), miscRNA.
6420541	UBL5	59286	Homo sapiens ubiquitin-like 5 (UBL5), transcript variant 2, mRNA.
940653	LOC388076	388076	PREDICTED: Homo sapiens hypothetical LOC388076 (LOC388076), mRNA.
6450546	VKORC1	79001	Homo sapiens vitamin K epoxide reductase complex, subunit 1 (VKORC1), transcript variant 1, mRNA.
1430639	MRPS18C	51023	Homo sapiens mitochondrial ribosomal protein S18C (MRPS18C), nuclear gene encoding mitochondrial protein, mRNA.
2900470	LOC388532	388532	PREDICTED: Homo sapiens similar to ribosomal protein L21 (LOC388532), mRNA.
4050370	METTL5	29081	Homo sapiens methyltransferase like 5 (METTL5), mRNA.
1780678	LOC374395	374395	Homo sapiens similar to RIKEN cDNA 1810059G22 (LOC374395), mRNA.
6450524	LOC653737	653737	PREDICTED: Homo sapiens hypothetical LOC653737 (LOC653737), mRNA.
2710646	MSRB2	22921	Homo sapiens methionine sulfoxide reductase B2 (MSRB2), mRNA.
2060181	SNHG8	100093630	Homo sapiens small nucleolar RNA host gene 8 (non-protein coding) (SNHG8), non-coding RNA.
70634	RABAC1	10567	Homo sapiens Rab acceptor 1 (prenylated) (RABAC1), mRNA.
2340736	LOC389156	389156	PREDICTED: Homo sapiens misc_RNA (LOC389156), miscRNA.
6560066	MTHFS	10588	Homo sapiens 5,10-methenyltetrahydrofolate synthetase (5-formyltetrahydrofolate cyclo-ligase) (MTHFS), mRNA.
4640291	LOC729208	729208	PREDICTED: Homo sapiens misc_RNA (LOC729208), miscRNA.
6350292	C1orf50	79078	Homo sapiens chromosome 1 open reading frame 50 (C1orf50), mRNA.
1110228	TMEM136	219902	Homo sapiens transmembrane protein 136 (TMEM136), mRNA.
630735	COX17	10063	Homo sapiens COX17 cytochrome c oxidase assembly homolog (S. cerevisiae) (COX17), nuclear gene encoding mitochondrial protein, mRNA.
6520692	C6orf125	84300	Homo sapiens chromosome 6 open reading frame 125 (C6orf125), mRNA.
5820292	COPZ2	51226	Homo sapiens coatomer protein complex, subunit zeta 2 (COPZ2), mRNA.
2230187	MAPBPIP	28956	Homo sapiens mitogen-activated protein-binding protein-interacting protein (MAPBPIP), mRNA.
7320435	DPM3	54344	Homo sapiens dolichyl-phosphate mannosyltransferase polypeptide 3 (DPM3), transcript variant 2, mRNA.
4880195	LOC440991	440991	PREDICTED: Homo sapiens misc_RNA (LOC440991), miscRNA.
3800445	MRPL24	79590	Homo sapiens mitochondrial ribosomal protein L24 (MRPL24), nuclear gene encoding mitochondrial protein, transcript variant 2, mRNA.
6840056	MYL6B	140465	Homo sapiens myosin, light chain 6B, alkali, smooth muscle and non-muscle (MYL6B), mRNA.
1170047	CRIP1	1396	Homo sapiens cysteine-rich protein 1 (intestinal) (CRIP1), mRNA.
2190630	LOC391019	391019	PREDICTED: Homo sapiens misc_RNA (LOC391019), miscRNA.
1010246	IFI6	2537	Homo sapiens interferon, alpha-inducible protein 6 (IFI6), transcript variant 2, mRNA.
290370	LOC100130070	100130070	PREDICTED: Homo sapiens similar to metallopanstimulin (LOC100130070), mRNA.
4760424	EIF3K	27335	Homo sapiens eukaryotic translation initiation factor 3, subunit K (EIF3K), mRNA.
940010	CHCHD10	400916	Homo sapiens coiled-coil-helix-coiled-coil-helix domain containing 10 (CHCHD10), mRNA.
2450368	GTF2A2	2958	Homo sapiens general transcription factor IIA, 2, 12kDa (GTF2A2), mRNA.
2630102	CCDC28B	79140	Homo sapiens coiled-coil domain containing 28B (CCDC28B), mRNA.
6580132	NDUFA6	4700	Homo sapiens NADH dehydrogenase (ubiquinone) 1 alpha subcomplex, 6, 14kDa (NDUFA6), nuclear gene encoding mitochondrial protein, mRNA.
5560131	ATOX1	475	Homo sapiens ATX1 antioxidant protein 1 homolog (yeast) (ATOX1), mRNA.
830403	PSME2	5721	Homo sapiens proteasome (prosome, macropain) activator subunit 2 (PA28 beta) (PSME2), mRNA.
4150309	ZNHIT1	10467	Homo sapiens zinc finger, HIT type 1 (ZNHIT1), mRNA.
2710451	LOC651894	651894	PREDICTED: Homo sapiens similar to ribosomal protein S12 (LOC651894), mRNA.
1690630	FAM43A	131583	Homo sapiens family with sequence similarity 43, member A (FAM43A), mRNA.
830739	RPP21	79897	Homo sapiens ribonuclease P/MRP 21kDa subunit (RPP21), mRNA.
3840471	LOC728782	728782	PREDICTED: Homo sapiens similar to ribosomal protein L21 (LOC728782), mRNA.
3390468	MRPL22	29093	Homo sapiens mitochondrial ribosomal protein L22 (MRPL22), nuclear gene encoding mitochondrial protein, transcript variant 1, mRNA.
150750	LOC347292	347292	PREDICTED: Homo sapiens similar to ribosomal protein L36 (LOC347292), mRNA.
1070025	ATPIF1	93974	Homo sapiens ATPase inhibitory factor 1 (ATPIF1), nuclear gene encoding mitochondrial protein, transcript variant 3, mRNA.
2850520	DPM3	54344	Homo sapiens dolichyl-phosphate mannosyltransferase polypeptide 3 (DPM3), transcript variant 1, mRNA.
4200056	LOC100131785	100131785	PREDICTED: Homo sapiens misc_RNA (LOC100131785), miscRNA.
6270717	SNRPC	6631	Homo sapiens small nuclear ribonucleoprotein polypeptide C (SNRPC), mRNA.
1230019	TSPO	706	Homo sapiens translocator protein (18kDa) (TSPO), transcript variant PBR, mRNA.
1580477	C11orf74	119710	Homo sapiens chromosome 11 open reading frame 74 (C11orf74), mRNA.
6900215	GTF2H5	404672	Homo sapiens general transcription factor IIH, polypeptide 5 (GTF2H5), mRNA.
7210544	LOC100133328	100133328	PREDICTED: Homo sapiens misc_RNA (LOC100133328), miscRNA.
6370484	POLR1D	51082	Homo sapiens polymerase (RNA) I polypeptide D, 16kDa (POLR1D), transcript variant 1, mRNA.
610451	HIST2H2AA3	8337	Homo sapiens histone cluster 2, H2aa3 (HIST2H2AA3), mRNA.
6220242	ETFB	2109	Homo sapiens electron-transfer-flavoprotein, beta polypeptide (ETFB), transcript variant 1, mRNA.
1450082	TRAPPC2L	51693	Homo sapiens trafficking protein particle complex 2-like (TRAPPC2L), mRNA.
1500538	LOC645138	645138	PREDICTED: Homo sapiens similar to ribosomal protein S11 (LOC645138), mRNA.
5390138	COX7A1	1346	Homo sapiens cytochrome c oxidase subunit VIIa polypeptide 1 (muscle) (COX7A1), mRNA.
3710400	AHNAK	79026	Homo sapiens AHNAK nucleoprotein (AHNAK), transcript variant 2, mRNA.
650301	SNRPF	6636	Homo sapiens small nuclear ribonucleoprotein polypeptide F (SNRPF), mRNA.
2680095	LOC392285	392285	PREDICTED: Homo sapiens misc_RNA (LOC392285), miscRNA.
580369	NDUFS4	4724	Homo sapiens NADH dehydrogenase (ubiquinone) Fe-S protein 4, 18kDa (NADH-coenzyme Q reductase) (NDUFS4), mRNA.
3990600	TMEM93	83460	Homo sapiens transmembrane protein 93 (TMEM93), transcript variant 2, mRNA.
4880360	FBL	2091	Homo sapiens fibrillarin (FBL), mRNA.
2000500	SF3B14	51639	Homo sapiens splicing factor 3B, 14 kDa subunit (SF3B14), mRNA.
7330379	PTMS	5763	Homo sapiens parathymosin (PTMS), mRNA.
2480064	C20orf199	441951	Homo sapiens chromosome 20 open reading frame 199 (C20orf199), transcript variant 3, non-coding RNA.
780364	LOC645157	645157	PREDICTED: Homo sapiens misc_RNA (LOC645157), miscRNA.
1010068	FKBP2	2286	Homo sapiens FK506 binding protein 2, 13kDa (FKBP2), transcript variant 1, mRNA.
3890397	C14orf112	51241	Homo sapiens chromosome 14 open reading frame 112 (C14orf112), mRNA.
460379	IFI27L1	122509	Homo sapiens interferon, alpha-inducible protein 27-like 1 (IFI27L1), transcript variant 1, mRNA.
1300608	SNHG9	735301	Homo sapiens small nucleolar RNA host gene 9 (non-protein coding) (SNHG9), non-coding RNA.
2970482	RNU1-5	26863	Homo sapiens RNA, U1 small nuclear 5 (RNU1-5), small nuclear RNA.
5260360	LOC100131801	100131801	PREDICTED: Homo sapiens similar to hCG2036585 (LOC100131801), mRNA.
7160475	C6orf160	387066	PREDICTED: Homo sapiens chromosome 6 open reading frame 160, transcript variant 4 (C6orf160), mRNA.
3400674	MRPS15	64960	Homo sapiens mitochondrial ribosomal protein S15 (MRPS15), nuclear gene encoding mitochondrial protein, mRNA.
4200181	C19orf70	125988	Homo sapiens chromosome 19 open reading frame 70 (C19orf70), mRNA.
610400	C11orf1	64776	Homo sapiens chromosome 11 open reading frame 1 (C11orf1), mRNA.
6480184	LSMD1	84316	Homo sapiens LSM domain containing 1 (LSMD1), mRNA.
2260053	LOC128192	128192	PREDICTED: Homo sapiens hypothetical LOC128192 (LOC128192), mRNA.
5960224	PTTG3P	26255	Homo sapiens pituitary tumor-transforming 3 (pseudogene) (PTTG3P), non-coding RNA.
540240	LOC440957	440957	Homo sapiens similar to CG32736-PA (LOC440957), mRNA.
5290593	GAMT	2593	Homo sapiens guanidinoacetate N-methyltransferase (GAMT), transcript variant 1, mRNA.
3830605	DNLZ	728489	Homo sapiens DNL-type zinc finger (DNLZ), mRNA.
6270768	PLAC9	219348	Homo sapiens placenta-specific 9 (PLAC9), mRNA.
3850110	COX6A1	1337	Homo sapiens cytochrome c oxidase subunit VIa polypeptide 1 (COX6A1), nuclear gene encoding mitochondrial protein, mRNA.
6250537	LOC729500	729500	PREDICTED: Homo sapiens misc_RNA (LOC729500), partial miscRNA.
5890730	RPS26L	400156	PREDICTED: Homo sapiens 40S ribosomal protein S26-like (RPS26L), misc RNA.
5080600	LOC100132457	100132457	PREDICTED: Homo sapiens similar to Sm protein G (LOC100132457), mRNA.
6130433	C8orf40	114926	Homo sapiens chromosome 8 open reading frame 40 (C8orf40), mRNA.
7210725	MRPL55	128308	Homo sapiens mitochondrial ribosomal protein L55 (MRPL55), nuclear gene encoding mitochondrial protein, transcript variant 5, mRNA.
7400719	EXOSC1	51013	Homo sapiens exosome component 1 (EXOSC1), mRNA. XM_944315 XM_944318 XM_944323
3360471	EDF1	8721	Homo sapiens endothelial differentiation-related factor 1 (EDF1), transcript variant alpha, mRNA.
4900114	MORN2	378464	Homo sapiens MORN repeat containing 2 (MORN2), mRNA.
1770102	NDUFB3	4709	Homo sapiens NADH dehydrogenase (ubiquinone) 1 beta subcomplex, 3, 12kDa (NDUFB3), mRNA.
6290091	SNORD104	692227	Homo sapiens small nucleolar RNA, C/D box 104 (SNORD104), small nucleolar RNA.
5690328	MRPS33	51650	Homo sapiens mitochondrial ribosomal protein S33 (MRPS33), nuclear gene encoding mitochondrial protein, transcript variant 1, mRNA.
20465	MRPL36	64979	Homo sapiens mitochondrial ribosomal protein L36 (MRPL36), nuclear gene encoding mitochondrial protein, mRNA.
60148	BOLA2	552900	Homo sapiens bolA homolog 2 (E. coli) (BOLA2), mRNA.
6370468	BOLA2	552900	Homo sapiens bolA homolog 2 (E. coli) (BOLA2), mRNA.
3390093	BOLA3	388962	Homo sapiens bolA homolog 3 (E. coli) (BOLA3), transcript variant 2, mRNA.
2600278	C1orf54	79630	Homo sapiens chromosome 1 open reading frame 54 (C1orf54), mRNA.
4210066	DEF8	54849	Homo sapiens differentially expressed in FDCP 8 homolog (mouse) (DEF8), transcript variant 2, mRNA.
3130010	DEF8	54849	Homo sapiens differentially expressed in FDCP 8 homolog (mouse) (DEF8), transcript variant 2, mRNA.
1300369	LOC255783	255783	Homo sapiens hypothetical protein LOC255783 (LOC255783), non-coding RNA.
5870446	ATP5G1	516	Homo sapiens ATP synthase, H+ transporting, mitochondrial F0 complex, subunit C1 (subunit 9) (ATP5G1), nuclear gene encoding mitochondrial protein, transcript variant 2, mRNA.
7100280	C11orf48	79081	Homo sapiens chromosome 11 open reading frame 48 (C11orf48), mRNA.
1050619	NPM3	10360	Homo sapiens nucleophosmin/nucleoplasmin, 3 (NPM3), mRNA.
3190671	ATP5D	513	Homo sapiens ATP synthase, H+ transporting, mitochondrial F1 complex, delta subunit (ATP5D), nuclear gene encoding mitochondrial protein, transcript variant 1, mRNA.
4810725	LOC729769	729769	PREDICTED: Homo sapiens similar to Ubiquinol-cytochrome c reductase hinge protein (LOC729769), mRNA.
1300315	MRPL21	219927	Homo sapiens mitochondrial ribosomal protein L21 (MRPL21), nuclear gene encoding mitochondrial protein, transcript variant 4, mRNA.
1450377	BLOC1S1	2647	Homo sapiens biogenesis of lysosome-related organelles complex-1, subunit 1 (BLOC1S1), mRNA.
2140176	THYN1	29087	Homo sapiens thymocyte nuclear protein 1 (THYN1), transcript variant 3, mRNA.
7040184	CCDC34	91057	Homo sapiens coiled-coil domain containing 34 (CCDC34), transcript variant 1, mRNA.
2320079	NME4	4833	Homo sapiens non-metastatic cells 4, protein expressed in (NME4), nuclear gene encoding mitochondrial protein, mRNA.
5810687	LARP6	55323	Homo sapiens La ribonucleoprotein domain family, member 6 (LARP6), transcript variant 2, mRNA.
620433	C1orf122	127687	Homo sapiens chromosome 1 open reading frame 122 (C1orf122), mRNA.
7550750	LOC388556	388556	PREDICTED: Homo sapiens misc_RNA (LOC388556), miscRNA.
6480494	MGMT	4255	Homo sapiens O-6-methylguanine-DNA methyltransferase (MGMT), mRNA.
5960411	BCYRN1	618	Homo sapiens brain cytoplasmic RNA 1 (non-protein coding) (BCYRN1), non-coding RNA.
2510630	LOC727865	727865	PREDICTED: Homo sapiens misc_RNA (LOC727865), miscRNA.
4010180	LOC653156	653156	PREDICTED: Homo sapiens similar to hCG1782414 (LOC653156), mRNA.
3460066	ROBLD3	28956	Homo sapiens roadblock domain containing 3 (ROBLD3), mRNA.
4540441	LOC641768	641768	PREDICTED: Homo sapiens similar to ribosomal protein S26, transcript variant 2 (LOC641768), mRNA.
7510632	TAF10	6881	Homo sapiens TAF10 RNA polymerase II, TATA box binding protein (TBP)-associated factor, 30kDa (TAF10), mRNA.
520672	LOC391833	391833	PREDICTED: Homo sapiens misc_RNA (LOC391833), miscRNA.
1510291	PTTG1	9232	Homo sapiens pituitary tumor-transforming 1 (PTTG1), mRNA.
10414	PTTG1	9232	Homo sapiens pituitary tumor-transforming 1 (PTTG1), mRNA.
1580021	TCTEX1D2	255758	Homo sapiens Tctex1 domain containing 2 (TCTEX1D2), mRNA.
7150433	TCTEX1D2	255758	Homo sapiens Tctex1 domain containing 2 (TCTEX1D2), mRNA.
6450424	NME3	4832	Homo sapiens non-metastatic cells 3, protein expressed in (NME3), mRNA.
5420347	HCFC1R1	54985	Homo sapiens host cell factor C1 regulator 1 (XPO1 dependent) (HCFC1R1), transcript variant 3, mRNA.
5670661	MGC71993	440400	Homo sapiens similar to DNA segment, Chr 11, Brigham & Womens Genetics 0434 expressed (MGC71993), mRNA.
7150762	PTGIS	5740	Homo sapiens prostaglandin I2 (prostacyclin) synthase (PTGIS), mRNA.
3930008	RPL14	9045	Homo sapiens ribosomal protein L14 (RPL14), transcript variant 1, mRNA.
2140753	RPL14	9045	Homo sapiens ribosomal protein L14 (RPL14), transcript variant 1, mRNA.
6760746	MRPL55	128308	Homo sapiens mitochondrial ribosomal protein L55 (MRPL55), nuclear gene encoding mitochondrial protein, transcript variant 1, mRNA.
4290349	LOC643949	643949	PREDICTED: Homo sapiens similar to 60S acidic ribosomal protein P2 (LOC643949), mRNA.
7210528	TMEM205	374882	Homo sapiens transmembrane protein 205 (TMEM205), mRNA.
1690025	MCTS1	28985	Homo sapiens malignant T cell amplified sequence 1 (MCTS1), mRNA.
5810088	AURKAIP1	54998	Homo sapiens aurora kinase A interacting protein 1 (AURKAIP1), mRNA.
3800025	C2orf28	51374	Homo sapiens chromosome 2 open reading frame 28 (C2orf28), transcript variant 2, mRNA.
5690576	TBCB	1155	Homo sapiens tubulin folding cofactor B (TBCB), mRNA.
6650360	LOC648638	648638	PREDICTED: Homo sapiens similar to Peptidyl-prolyl cis-trans isomerase NIMA-interacting 4 (Rotamase Pin4) (PPIase Pin4) (Parvulin 14) (Par14) (Peptidyl-prolyl cis/trans isomerase EPVH) (hPar14) (LOC648638), mRNA.
7330068	SF3B5	83443	Homo sapiens splicing factor 3b, subunit 5, 10kDa (SF3B5), mRNA.
6040110	LOC647285	647285	PREDICTED: Homo sapiens misc_RNA (LOC647285), miscRNA.
1510019	MGST2	4258	Homo sapiens microsomal glutathione S-transferase 2 (MGST2), mRNA.
6290168	C10orf116	10974	Homo sapiens chromosome 10 open reading frame 116 (C10orf116), mRNA.
6590593	ATP5J2	9551	Homo sapiens ATP synthase, H+ transporting, mitochondrial F0 complex, subunit F2 (ATP5J2), nuclear gene encoding mitochondrial protein, transcript variant 1, mRNA.
2340474	SERF1B	728492	Homo sapiens small EDRK-rich factor 1B (centromeric) (SERF1B), mRNA.
6580253	SERF1B	728492	Homo sapiens small EDRK-rich factor 1B (centromeric) (SERF1B), mRNA.
540131	PXMP2	5827	Homo sapiens peroxisomal membrane protein 2, 22kDa (PXMP2), mRNA.
2360593	DDT	1652	Homo sapiens D-dopachrome tautomerase (DDT), transcript variant 1, mRNA.
1940164	LSM5	23658	Homo sapiens LSM5 homolog, U6 small nuclear RNA associated (S. cerevisiae) (LSM5), mRNA.
4040307	LOC729500	729500	PREDICTED: Homo sapiens misc_RNA (LOC729500), partial miscRNA.
7100523	LOC727826	727826	PREDICTED: Homo sapiens hypothetical LOC727826 (LOC727826), mRNA.
3390072	LOC100133477	100133477	PREDICTED: Homo sapiens similar to Nop10p (LOC100133477), mRNA.
6620360	C12orf62	84987	Homo sapiens chromosome 12 open reading frame 62 (C12orf62), mRNA.
6370762	POLR2F	5435	Homo sapiens polymerase (RNA) II (DNA directed) polypeptide F (POLR2F), mRNA.
6420603	LOC730255	730255	PREDICTED: Homo sapiens misc_RNA (LOC730255), miscRNA.
5820170	SIVA1	10572	Homo sapiens SIVA1, apoptosis-inducing factor (SIVA1), transcript variant 1, mRNA.
2070746	RBX1	9978	Homo sapiens ring-box 1 (RBX1), mRNA.
1990047	C9orf119	375757	Homo sapiens chromosome 9 open reading frame 119 (C9orf119), mRNA.
6510487	FAM96B	51647	Homo sapiens family with sequence similarity 96, member B (FAM96B), mRNA.
1940048	CLEC11A	6320	Homo sapiens C-type lectin domain family 11, member A (CLEC11A), mRNA.
1050187	MRPL11	65003	Homo sapiens mitochondrial ribosomal protein L11 (MRPL11), nuclear gene encoding mitochondrial protein, transcript variant 2, mRNA.
730114	PRICKLE4	29964	Homo sapiens prickle homolog 4 (Drosophila) (PRICKLE4), mRNA.
4070392	CYBA	1535	Homo sapiens cytochrome b-245, alpha polypeptide (CYBA), mRNA.
5130497	S100A13	6284	Homo sapiens S100 calcium binding protein A13 (S100A13), transcript variant 3, mRNA.
5860148	S100A13	6284	Homo sapiens S100 calcium binding protein A13 (S100A13), transcript variant 3, mRNA.
2320367	NDUFA13	51079	Homo sapiens NADH dehydrogenase (ubiquinone) 1 alpha subcomplex, 13 (NDUFA13), mRNA.
4040176	LAMA5	3911	Homo sapiens laminin, alpha 5 (LAMA5), mRNA.
2680170	HSPE1	3336	Homo sapiens heat shock 10kDa protein 1 (chaperonin 10) (HSPE1), mRNA.
110110	HSPE1	3336	Homo sapiens heat shock 10kDa protein 1 (chaperonin 10) (HSPE1), mRNA.
6580131	MRPL22	29093	Homo sapiens mitochondrial ribosomal protein L22 (MRPL22), nuclear gene encoding mitochondrial protein, transcript variant 2, mRNA.
7100010	NBL1	4681	Homo sapiens neuroblastoma, suppression of tumorigenicity 1 (NBL1), transcript variant 2, mRNA.
50450	TMEM179B	374395	Homo sapiens transmembrane protein 179B (TMEM179B), mRNA.
2760519	CKLF	51192	Homo sapiens chemokine-like factor (CKLF), transcript variant 6, mRNA.
5490477	EBPL	84650	Homo sapiens emopamil binding protein-like (EBPL), mRNA.
7000040	LOC729236	729236	PREDICTED: Homo sapiens misc_RNA (LOC729236), miscRNA.
5560682	KRT10	3858	Homo sapiens keratin 10 (epidermolytic hyperkeratosis; keratosis palmaris et plantaris) (KRT10), mRNA.
1850468	CCDC56	28958	Homo sapiens coiled-coil domain containing 56 (CCDC56), mRNA.

## Sheet: DAVID GOs common down
gene list: 353 miR and moR common genes down
Functional Annotation Clustering
Current Background: Homo sapiens
291/353 genes recognized by DAVID
Statistical test: a modified Fisher Exact P-Value (EASE score)
45 Cluster(s)
Annotation Cluster 1	Enrichment Score: 17.69		Count	P_Value	Benjamini
	GOTERM_MF_FAT	structural constituent of ribosome	37	3.9E-34	1.1E-31
	GOTERM_CC_FAT	ribosome	41	4.9E-33	1.2E-30
	GOTERM_CC_FAT	ribosomal subunit	34	2.9E-32	3.6E-30
	GOTERM_CC_FAT	ribonucleoprotein complex	54	1.7E-30	1.4E-28
	GOTERM_BP_FAT	translation	39	1.8E-25	1.7E-22
	GOTERM_BP_FAT	translational elongation	22	7.5E-20	3.6E-17
	GOTERM_CC_FAT	cytosolic ribosome	20	4.4E-18	1.9E-16
	GOTERM_MF_FAT	structural molecule activity	41	2.5E-17	3.7E-15
	GOTERM_CC_FAT	large ribosomal subunit	18	6.4E-17	4.0E-15
	GOTERM_CC_FAT	cytosolic part	23	5.0E-16	1.6E-14
	GOTERM_CC_FAT	small ribosomal subunit	17	5.3E-16	1.4E-14
	GOTERM_CC_FAT	cytosolic small ribosomal subunit	12	8.8E-12	1.4E-10
	GOTERM_CC_FAT	cytosolic large ribosomal subunit	8	1.2E-6	1.3E-5
	GOTERM_CC_FAT	cytosol	42	3.6E-6	3.7E-5
	GOTERM_CC_FAT	intracellular non-membrane-bounded organelle	63	3.4E-5	2.8E-4
	GOTERM_CC_FAT	non-membrane-bounded organelle	63	3.4E-5	2.8E-4
Annotation Cluster 2	Enrichment Score: 9.85		Count	P_Value	Benjamini
	GOTERM_CC_FAT	mitochondrial part	46	2.9E-20	1.8E-18
	GOTERM_CC_FAT	mitochondrion	61	2.9E-20	1.5E-18
	GOTERM_CC_FAT	mitochondrial membrane part	22	1.1E-16	3.4E-15
	GOTERM_CC_FAT	respiratory chain	17	1.1E-14	2.5E-13
	GOTERM_CC_FAT	mitochondrial envelope	32	9.3E-14	2.0E-12
	GOTERM_CC_FAT	mitochondrial membrane	31	1.2E-13	2.2E-12
	GOTERM_CC_FAT	mitochondrial respiratory chain	15	3.7E-13	6.6E-12
	GOTERM_BP_FAT	oxidative phosphorylation	16	2.0E-12	6.5E-10
	GOTERM_CC_FAT	mitochondrial inner membrane	26	3.3E-12	5.6E-11
	GOTERM_MF_FAT	NADH dehydrogenase (ubiquinone) activity	12	5.3E-12	5.2E-10
	GOTERM_MF_FAT	NADH dehydrogenase (quinone) activity	12	5.3E-12	5.2E-10
	GOTERM_MF_FAT	NADH dehydrogenase activity	12	5.3E-12	5.2E-10
	GOTERM_CC_FAT	organelle inner membrane	26	1.6E-11	2.4E-10
	GOTERM_BP_FAT	generation of precursor metabolites and energy	24	1.7E-11	4.0E-9
	GOTERM_BP_FAT	electron transport chain	16	1.9E-11	3.7E-9
	GOTERM_MF_FAT	oxidoreductase activity, acting on NADH or NADPH, quinone or similar compound as acceptor	12	2.5E-11	1.8E-9
	GOTERM_BP_FAT	mitochondrial ATP synthesis coupled electron transport	12	1.2E-10	1.9E-8
	GOTERM_BP_FAT	ATP synthesis coupled electron transport	12	1.2E-10	1.9E-8
	GOTERM_CC_FAT	mitochondrial respiratory chain complex I	11	3.8E-10	5.1E-9
	GOTERM_CC_FAT	respiratory chain complex I	11	3.8E-10	5.1E-9
	GOTERM_CC_FAT	NADH dehydrogenase complex	11	3.8E-10	5.1E-9
	GOTERM_CC_FAT	organelle envelope	33	5.0E-10	6.3E-9
	GOTERM_BP_FAT	respiratory electron transport chain	12	5.4E-10	7.4E-8
	GOTERM_CC_FAT	envelope	33	5.4E-10	6.5E-9
	GOTERM_MF_FAT	oxidoreductase activity, acting on NADH or NADPH	13	7.0E-10	4.1E-8
	GOTERM_BP_FAT	mitochondrial electron transport, NADH to ubiquinone	10	2.7E-9	3.2E-7
	GOTERM_BP_FAT	cellular respiration	12	5.0E-8	5.3E-6
	GOTERM_BP_FAT	energy derivation by oxidation of organic compounds	12	2.8E-6	2.6E-4
	GOTERM_CC_FAT	organelle membrane	36	1.0E-5	9.5E-5
	GOTERM_BP_FAT	oxidation reduction	19	1.7E-3	8.1E-2
	GOTERM_BP_FAT	phosphorylation	17	5.7E-2	5.3E-1
	GOTERM_BP_FAT	phosphorus metabolic process	19	8.2E-2	6.4E-1
	GOTERM_BP_FAT	phosphate metabolic process	19	8.2E-2	6.4E-1
Annotation Cluster 3	Enrichment Score: 6.68		Count	P_Value	Benjamini
	GOTERM_CC_FAT	organellar ribosome	12	7.7E-11	1.1E-9
	GOTERM_CC_FAT	mitochondrial ribosome	12	7.7E-11	1.1E-9
	GOTERM_CC_FAT	organellar large ribosomal subunit	7	1.5E-7	1.8E-6
	GOTERM_CC_FAT	mitochondrial large ribosomal subunit	7	1.5E-7	1.8E-6
	GOTERM_CC_FAT	mitochondrial lumen	16	1.4E-6	1.4E-5
	GOTERM_CC_FAT	mitochondrial matrix	16	1.4E-6	1.4E-5
	GOTERM_CC_FAT	organellar small ribosomal subunit	5	1.2E-4	9.2E-4
	GOTERM_CC_FAT	mitochondrial small ribosomal subunit	5	1.2E-4	9.2E-4
Annotation Cluster 4	Enrichment Score: 3.22		Count	P_Value	Benjamini
	GOTERM_CC_FAT	membrane-enclosed lumen	51	1.1E-5	1.0E-4
	GOTERM_CC_FAT	organelle lumen	49	3.2E-5	2.7E-4
	GOTERM_CC_FAT	intracellular organelle lumen	48	3.8E-5	3.0E-4
	GOTERM_CC_FAT	nuclear lumen	31	3.6E-2	2.0E-1
	GOTERM_CC_FAT	nucleoplasm	18	1.6E-1	6.0E-1
Annotation Cluster 5	Enrichment Score: 3.06		Count	P_Value	Benjamini
	GOTERM_BP_FAT	RNA processing	22	8.8E-6	7.6E-4
	GOTERM_BP_FAT	RNA splicing	13	3.4E-4	2.7E-2
	GOTERM_BP_FAT	RNA splicing, via transesterification reactions	9	8.7E-4	5.4E-2
	GOTERM_BP_FAT	RNA splicing, via transesterification reactions with bulged adenosine as nucleophile	9	8.7E-4	5.4E-2
	GOTERM_BP_FAT	nuclear mRNA splicing, via spliceosome	9	8.7E-4	5.4E-2
	GOTERM_BP_FAT	mRNA processing	13	1.0E-3	5.5E-2
	GOTERM_BP_FAT	mRNA metabolic process	13	3.3E-3	1.2E-1
	GOTERM_CC_FAT	spliceosome	6	4.6E-2	2.5E-1
Annotation Cluster 6	Enrichment Score: 1.78		Count	P_Value	Benjamini
	GOTERM_CC_FAT	mitochondrial proton-transporting ATP synthase complex	6	6.6E-6	6.4E-5
	GOTERM_CC_FAT	proton-transporting ATP synthase complex	6	1.1E-5	1.0E-4
	GOTERM_MF_FAT	hydrogen ion transmembrane transporter activity	9	2.2E-5	9.2E-4
	GOTERM_MF_FAT	monovalent inorganic cation transmembrane transporter activity	9	6.2E-5	2.0E-3
	GOTERM_CC_FAT	proton-transporting two-sector ATPase complex	6	5.1E-4	3.8E-3
	GOTERM_MF_FAT	inorganic cation transmembrane transporter activity	9	8.0E-4	2.3E-2
	GOTERM_BP_FAT	purine ribonucleoside triphosphate biosynthetic process	7	1.7E-3	8.0E-2
	GOTERM_BP_FAT	ribonucleoside triphosphate biosynthetic process	7	1.8E-3	8.0E-2
	GOTERM_BP_FAT	purine nucleoside triphosphate biosynthetic process	7	1.8E-3	8.0E-2
	GOTERM_BP_FAT	nucleoside triphosphate biosynthetic process	7	2.1E-3	8.9E-2
	GOTERM_BP_FAT	purine ribonucleoside triphosphate metabolic process	7	4.2E-3	1.4E-1
	GOTERM_BP_FAT	purine ribonucleotide biosynthetic process	7	4.2E-3	1.4E-1
	GOTERM_BP_FAT	ribonucleoside triphosphate metabolic process	7	4.4E-3	1.4E-1
	GOTERM_BP_FAT	purine nucleoside triphosphate metabolic process	7	5.2E-3	1.6E-1
	GOTERM_BP_FAT	ribonucleotide biosynthetic process	7	5.6E-3	1.6E-1
	GOTERM_BP_FAT	nucleoside triphosphate metabolic process	7	7.3E-3	1.9E-1
	GOTERM_BP_FAT	proton transport	5	8.1E-3	2.0E-1
	GOTERM_BP_FAT	hydrogen transport	5	9.1E-3	2.2E-1
	GOTERM_BP_FAT	purine ribonucleotide metabolic process	7	9.3E-3	2.1E-1
	GOTERM_BP_FAT	ribonucleotide metabolic process	7	1.2E-2	2.4E-1
	GOTERM_BP_FAT	purine nucleotide biosynthetic process	7	1.3E-2	2.4E-1
	GOTERM_BP_FAT	ATP synthesis coupled proton transport	4	1.5E-2	2.6E-1
	GOTERM_BP_FAT	energy coupled proton transport, down electrochemical gradient	4	1.5E-2	2.6E-1
	GOTERM_MF_FAT	hydrogen ion transporting ATP synthase activity, rotational mechanism	3	1.8E-2	3.8E-1
	GOTERM_CC_FAT	proton-transporting ATP synthase complex, coupling factor F(o)	3	2.0E-2	1.2E-1
	GOTERM_BP_FAT	ion transmembrane transport	4	2.6E-2	3.6E-1
	GOTERM_BP_FAT	ATP biosynthetic process	5	2.9E-2	3.9E-1
	GOTERM_BP_FAT	purine nucleotide metabolic process	7	3.5E-2	4.1E-1
	GOTERM_BP_FAT	nucleotide biosynthetic process	7	3.5E-2	4.1E-1
	GOTERM_MF_FAT	proton-transporting ATPase activity, rotational mechanism	3	3.6E-2	5.3E-1
	GOTERM_BP_FAT	nucleobase, nucleoside and nucleotide biosynthetic process	7	4.0E-2	4.5E-1
	GOTERM_BP_FAT	nucleobase, nucleoside, nucleotide and nucleic acid biosynthetic process	7	4.0E-2	4.5E-1
	GOTERM_BP_FAT	ATP metabolic process	5	4.8E-2	4.8E-1
	GOTERM_CC_FAT	proton-transporting two-sector ATPase complex, proton-transporting domain	3	4.9E-2	2.5E-1
	GOTERM_BP_FAT	nitrogen compound biosynthetic process	9	6.2E-2	5.6E-1
	GOTERM_MF_FAT	cation-transporting ATPase activity	3	8.0E-2	7.0E-1
	GOTERM_MF_FAT	ATPase activity, coupled to transmembrane movement of ions	3	2.5E-1	9.4E-1
	GOTERM_MF_FAT	ATPase activity, coupled to transmembrane movement of substances	3	4.2E-1	9.9E-1
	GOTERM_MF_FAT	ATPase activity, coupled to movement of substances	3	4.2E-1	9.9E-1
	GOTERM_MF_FAT	hydrolase activity, acting on acid anhydrides, catalyzing transmembrane movement of substances	3	4.3E-1	9.9E-1
	GOTERM_MF_FAT	P-P-bond-hydrolysis-driven transmembrane transporter activity	3	4.7E-1	9.9E-1
	GOTERM_MF_FAT	primary active transmembrane transporter activity	3	4.7E-1	9.9E-1
	GOTERM_BP_FAT	monovalent inorganic cation transport	5	6.0E-1	1.0E0
	GOTERM_MF_FAT	ATPase activity	5	6.4E-1	1.0E0
	GOTERM_BP_FAT	cation transport	7	7.3E-1	1.0E0
	GOTERM_MF_FAT	ATPase activity, coupled	3	8.7E-1	1.0E0
	GOTERM_BP_FAT	ion transport	8	8.8E-1	1.0E0
	GOTERM_BP_FAT	transmembrane transport	5	9.4E-1	1.0E0
Annotation Cluster 7	Enrichment Score: 1.6		Count	P_Value	Benjamini
	GOTERM_BP_FAT	rRNA transcription	4	1.5E-3	7.8E-2
	GOTERM_BP_FAT	RNA elongation from RNA polymerase II promoter	5	3.4E-3	1.2E-1
	GOTERM_BP_FAT	RNA elongation	5	4.3E-3	1.4E-1
	GOTERM_CC_FAT	nuclear DNA-directed RNA polymerase complex	4	5.8E-3	4.1E-2
	GOTERM_CC_FAT	DNA-directed RNA polymerase complex	4	5.8E-3	4.1E-2
	GOTERM_CC_FAT	RNA polymerase complex	4	6.4E-3	4.4E-2
	GOTERM_CC_FAT	DNA-directed RNA polymerase II, holoenzyme	6	6.9E-3	4.6E-2
	GOTERM_BP_FAT	transcription initiation from RNA polymerase II promoter	5	1.2E-2	2.4E-1
	GOTERM_BP_FAT	transcription, DNA-dependent	10	1.4E-2	2.5E-1
	GOTERM_BP_FAT	RNA biosynthetic process	10	1.5E-2	2.6E-1
	GOTERM_CC_FAT	DNA-directed RNA polymerase II, core complex	3	1.8E-2	1.1E-1
	GOTERM_MF_FAT	DNA-directed RNA polymerase activity	4	1.8E-2	3.6E-1
	GOTERM_MF_FAT	RNA polymerase activity	4	1.8E-2	3.6E-1
	GOTERM_BP_FAT	transcription initiation	5	2.3E-2	3.4E-1
	GOTERM_BP_FAT	protein complex assembly	13	3.2E-2	4.0E-1
	GOTERM_BP_FAT	protein complex biogenesis	13	3.2E-2	4.0E-1
	GOTERM_BP_FAT	transcription from RNA polymerase II promoter	6	1.9E-1	8.9E-1
	GOTERM_MF_FAT	nucleotidyltransferase activity	4	2.2E-1	9.3E-1
	GOTERM_CC_FAT	nucleoplasm part	10	4.4E-1	9.4E-1
	GOTERM_MF_FAT	protein kinase activity	3	1.0E0	1.0E0
	GOTERM_BP_FAT	transcription	16	1.0E0	1.0E0
Annotation Cluster 8	Enrichment Score: 1.59		Count	P_Value	Benjamini
	GOTERM_BP_FAT	ribonucleoprotein complex biogenesis	9	2.5E-3	9.7E-2
	GOTERM_BP_FAT	ribosome biogenesis	7	5.2E-3	1.6E-1
	GOTERM_BP_FAT	rRNA processing	6	7.0E-3	1.9E-1
	GOTERM_BP_FAT	rRNA metabolic process	6	8.3E-3	2.0E-1
	GOTERM_BP_FAT	ncRNA processing	8	1.1E-2	2.4E-1
	GOTERM_BP_FAT	ncRNA metabolic process	8	3.1E-2	3.9E-1
	GOTERM_CC_FAT	nucleolus	15	1.5E-1	6.0E-1
	GOTERM_BP_FAT	tRNA processing	3	2.6E-1	9.3E-1
	GOTERM_BP_FAT	tRNA metabolic process	3	4.6E-1	9.9E-1
Annotation Cluster 9	Enrichment Score: 1.57		Count	P_Value	Benjamini
	GOTERM_BP_FAT	macromolecular complex assembly	18	6.0E-3	1.7E-1
	GOTERM_BP_FAT	macromolecular complex subunit organization	18	1.1E-2	2.4E-1
	GOTERM_BP_FAT	protein complex assembly	13	3.2E-2	4.0E-1
	GOTERM_BP_FAT	protein complex biogenesis	13	3.2E-2	4.0E-1
	GOTERM_BP_FAT	cellular macromolecular complex assembly	9	5.6E-2	5.3E-1
	GOTERM_BP_FAT	cellular macromolecular complex subunit organization	9	9.5E-2	6.8E-1
Annotation Cluster 10	Enrichment Score: 1.38		Count	P_Value	Benjamini
	GOTERM_MF_FAT	endoribonuclease activity	4	2.3E-2	4.1E-1
	GOTERM_MF_FAT	endonuclease activity	5	4.2E-2	5.6E-1
	GOTERM_MF_FAT	ribonuclease activity	4	5.5E-2	6.2E-1
	GOTERM_MF_FAT	nuclease activity	6	5.6E-2	6.1E-1
Annotation Cluster 11	Enrichment Score: 1.29		Count	P_Value	Benjamini
	GOTERM_MF_FAT	oxidoreductase activity, acting on heme group of donors, oxygen as acceptor	3	5.1E-2	6.2E-1
	GOTERM_MF_FAT	oxidoreductase activity, acting on heme group of donors	3	5.1E-2	6.2E-1
	GOTERM_MF_FAT	cytochrome-c oxidase activity	3	5.1E-2	6.2E-1
	GOTERM_MF_FAT	heme-copper terminal oxidase activity	3	5.1E-2	6.2E-1
Annotation Cluster 12	Enrichment Score: 1.14		Count	P_Value	Benjamini
	GOTERM_BP_FAT	protein homooligomerization	5	3.5E-2	4.2E-1
	GOTERM_BP_FAT	protein homotetramerization	3	4.5E-2	4.6E-1
	GOTERM_BP_FAT	protein tetramerization	3	9.1E-2	6.7E-1
	GOTERM_BP_FAT	protein oligomerization	5	1.9E-1	8.9E-1
Annotation Cluster 13	Enrichment Score: 1.03		Count	P_Value	Benjamini
	GOTERM_BP_FAT	regulation of caspase activity	7	5.6E-4	4.1E-2
	GOTERM_BP_FAT	regulation of endopeptidase activity	7	6.9E-4	4.6E-2
	GOTERM_BP_FAT	regulation of peptidase activity	7	8.9E-4	5.2E-2
	GOTERM_BP_FAT	activation of caspase activity	4	3.3E-2	4.0E-1
	GOTERM_BP_FAT	positive regulation of peptidase activity	4	4.1E-2	4.5E-1
	GOTERM_BP_FAT	positive regulation of caspase activity	4	4.1E-2	4.5E-1
	GOTERM_BP_FAT	regulation of binding	6	5.0E-2	4.9E-1
	GOTERM_BP_FAT	regulation of DNA binding	5	7.3E-2	6.1E-1
	GOTERM_BP_FAT	regulation of hydrolase activity	9	7.4E-2	6.0E-1
	GOTERM_BP_FAT	regulation of transcription factor activity	4	1.5E-1	8.3E-1
	GOTERM_BP_FAT	positive regulation of hydrolase activity	5	2.0E-1	9.0E-1
	GOTERM_BP_FAT	positive regulation of DNA binding	3	2.3E-1	9.2E-1
	GOTERM_BP_FAT	induction of apoptosis	7	2.4E-1	9.2E-1
	GOTERM_BP_FAT	induction of programmed cell death	7	2.4E-1	9.2E-1
	GOTERM_BP_FAT	apoptosis	11	2.6E-1	9.3E-1
	GOTERM_BP_FAT	positive regulation of binding	3	2.7E-1	9.4E-1
	GOTERM_BP_FAT	programmed cell death	11	2.7E-1	9.4E-1
	GOTERM_BP_FAT	positive regulation of apoptosis	8	3.3E-1	9.7E-1
	GOTERM_BP_FAT	positive regulation of programmed cell death	8	3.3E-1	9.7E-1
	GOTERM_BP_FAT	cell death	12	3.3E-1	9.7E-1
	GOTERM_BP_FAT	positive regulation of cell death	8	3.4E-1	9.7E-1
	GOTERM_BP_FAT	death	12	3.4E-1	9.7E-1
	GOTERM_BP_FAT	regulation of apoptosis	12	4.8E-1	9.9E-1
	GOTERM_BP_FAT	regulation of programmed cell death	12	4.9E-1	9.9E-1
	GOTERM_BP_FAT	regulation of cell death	12	4.9E-1	9.9E-1
Annotation Cluster 14	Enrichment Score: 0.98		Count	P_Value	Benjamini
	GOTERM_BP_FAT	anaphase-promoting complex-dependent proteasomal ubiquitin-dependent protein catabolic process	5	1.0E-2	2.3E-1
	GOTERM_BP_FAT	negative regulation of ubiquitin-protein ligase activity during mitotic cell cycle	5	1.0E-2	2.3E-1
	GOTERM_BP_FAT	negative regulation of ubiquitin-protein ligase activity	5	1.1E-2	2.3E-1
	GOTERM_BP_FAT	negative regulation of ligase activity	5	1.1E-2	2.3E-1
	GOTERM_BP_FAT	positive regulation of ubiquitin-protein ligase activity during mitotic cell cycle	5	1.2E-2	2.4E-1
	GOTERM_BP_FAT	positive regulation of ubiquitin-protein ligase activity	5	1.3E-2	2.4E-1
	GOTERM_BP_FAT	regulation of ubiquitin-protein ligase activity during mitotic cell cycle	5	1.4E-2	2.5E-1
	GOTERM_BP_FAT	positive regulation of ligase activity	5	1.5E-2	2.6E-1
	GOTERM_BP_FAT	negative regulation of protein ubiquitination	5	1.6E-2	2.6E-1
	GOTERM_BP_FAT	regulation of ubiquitin-protein ligase activity	5	1.9E-2	2.9E-1
	GOTERM_BP_FAT	regulation of ligase activity	5	2.1E-2	3.2E-1
	GOTERM_BP_FAT	positive regulation of protein ubiquitination	5	2.4E-2	3.4E-1
	GOTERM_BP_FAT	negative regulation of cellular protein metabolic process	7	3.0E-2	4.0E-1
	GOTERM_BP_FAT	negative regulation of molecular function	10	3.1E-2	4.0E-1
	GOTERM_BP_FAT	negative regulation of protein metabolic process	7	3.6E-2	4.1E-1
	GOTERM_BP_FAT	regulation of protein ubiquitination	5	4.1E-2	4.5E-1
	GOTERM_BP_FAT	proteasomal protein catabolic process	5	4.4E-2	4.6E-1
	GOTERM_BP_FAT	proteasomal ubiquitin-dependent protein catabolic process	5	4.4E-2	4.6E-1
	GOTERM_BP_FAT	negative regulation of protein modification process	5	7.0E-2	6.0E-1
	GOTERM_BP_FAT	negative regulation of catalytic activity	8	7.0E-2	5.9E-1
	GOTERM_BP_FAT	positive regulation of molecular function	13	8.1E-2	6.3E-1
	GOTERM_BP_FAT	mitotic cell cycle	9	1.1E-1	7.4E-1
	GOTERM_BP_FAT	positive regulation of catalytic activity	11	1.4E-1	8.1E-1
	GOTERM_BP_FAT	regulation of cellular protein metabolic process	10	1.7E-1	8.6E-1
	GOTERM_BP_FAT	positive regulation of cellular protein metabolic process	6	1.9E-1	8.9E-1
	GOTERM_BP_FAT	positive regulation of protein metabolic process	6	2.1E-1	9.0E-1
	GOTERM_BP_FAT	positive regulation of protein modification process	5	2.3E-1	9.2E-1
	GOTERM_CC_FAT	proteasome complex	3	2.3E-1	7.3E-1
	GOTERM_BP_FAT	cell cycle process	10	3.2E-1	9.6E-1
	GOTERM_BP_FAT	regulation of protein modification process	6	3.4E-1	9.7E-1
	GOTERM_BP_FAT	protein modification by small protein conjugation or removal	4	3.4E-1	9.7E-1
	GOTERM_BP_FAT	negative regulation of macromolecule metabolic process	12	3.6E-1	9.7E-1
	GOTERM_BP_FAT	ubiquitin-dependent protein catabolic process	5	3.9E-1	9.8E-1
	GOTERM_BP_FAT	protein modification by small protein conjugation	3	5.1E-1	9.9E-1
	GOTERM_BP_FAT	cell cycle	11	5.6E-1	1.0E0
	GOTERM_BP_FAT	modification-dependent protein catabolic process	7	7.6E-1	1.0E0
	GOTERM_BP_FAT	modification-dependent macromolecule catabolic process	7	7.6E-1	1.0E0
	GOTERM_BP_FAT	proteolysis involved in cellular protein catabolic process	7	8.0E-1	1.0E0
	GOTERM_BP_FAT	cellular protein catabolic process	7	8.0E-1	1.0E0
	GOTERM_BP_FAT	protein catabolic process	7	8.3E-1	1.0E0
	GOTERM_BP_FAT	cellular macromolecule catabolic process	8	8.4E-1	1.0E0
	GOTERM_BP_FAT	positive regulation of macromolecule metabolic process	9	8.8E-1	1.0E0
	GOTERM_BP_FAT	macromolecule catabolic process	8	8.9E-1	1.0E0
	GOTERM_BP_FAT	proteolysis	10	9.4E-1	1.0E0
Annotation Cluster 15	Enrichment Score: 0.94		Count	P_Value	Benjamini
	GOTERM_MF_FAT	peptidyl-prolyl cis-trans isomerase activity	3	8.3E-2	7.0E-1
	GOTERM_MF_FAT	cis-trans isomerase activity	3	9.1E-2	7.1E-1
	GOTERM_BP_FAT	protein folding	5	2.0E-1	9.0E-1
Annotation Cluster 16	Enrichment Score: 0.76		Count	P_Value	Benjamini
	GOTERM_BP_FAT	nucleotide catabolic process	3	1.4E-1	8.1E-1
	GOTERM_BP_FAT	nucleobase, nucleoside, nucleotide and nucleic acid catabolic process	3	1.7E-1	8.7E-1
	GOTERM_BP_FAT	nucleobase, nucleoside and nucleotide catabolic process	3	1.7E-1	8.7E-1
	GOTERM_BP_FAT	nitrogen compound catabolic process	3	2.2E-1	9.1E-1
Annotation Cluster 17	Enrichment Score: 0.58		Count	P_Value	Benjamini
	GOTERM_MF_FAT	electron carrier activity	6	1.6E-1	8.7E-1
	GOTERM_MF_FAT	heme binding	4	2.1E-1	9.3E-1
	GOTERM_MF_FAT	tetrapyrrole binding	4	2.4E-1	9.3E-1
	GOTERM_MF_FAT	iron ion binding	5	5.7E-1	1.0E0
Annotation Cluster 18	Enrichment Score: 0.45		Count	P_Value	Benjamini
	GOTERM_CC_FAT	mitochondrial outer membrane	4	1.5E-1	5.9E-1
	GOTERM_CC_FAT	organelle outer membrane	4	2.0E-1	6.9E-1
	GOTERM_CC_FAT	outer membrane	4	2.1E-1	7.1E-1
	GOTERM_BP_FAT	protein transport	7	9.4E-1	1.0E0
	GOTERM_BP_FAT	establishment of protein localization	7	9.4E-1	1.0E0
Annotation Cluster 19	Enrichment Score: 0.44		Count	P_Value	Benjamini
	GOTERM_CC_FAT	cis-Golgi network	3	2.8E-2	1.7E-1
	GOTERM_BP_FAT	vesicle-mediated transport	7	7.7E-1	1.0E0
	GOTERM_CC_FAT	Golgi apparatus part	4	8.1E-1	1.0E0
	GOTERM_CC_FAT	Golgi apparatus	9	9.5E-1	1.0E0
Annotation Cluster 20	Enrichment Score: 0.31		Count	P_Value	Benjamini
	GOTERM_BP_FAT	striated muscle tissue development	3	4.6E-1	9.9E-1
	GOTERM_BP_FAT	muscle tissue development	3	4.9E-1	9.9E-1
	GOTERM_BP_FAT	muscle organ development	4	5.2E-1	9.9E-1
Annotation Cluster 21	Enrichment Score: 0.29		Count	P_Value	Benjamini
	GOTERM_MF_FAT	heparin binding	3	3.9E-1	9.9E-1
	GOTERM_MF_FAT	carbohydrate binding	6	4.9E-1	9.9E-1
	GOTERM_MF_FAT	glycosaminoglycan binding	3	5.5E-1	1.0E0
	GOTERM_MF_FAT	pattern binding	3	6.0E-1	1.0E0
	GOTERM_MF_FAT	polysaccharide binding	3	6.0E-1	1.0E0
Annotation Cluster 22	Enrichment Score: 0.27		Count	P_Value	Benjamini
	GOTERM_BP_FAT	negative regulation of catalytic activity	8	7.0E-2	5.9E-1
	GOTERM_BP_FAT	anti-apoptosis	3	7.5E-1	1.0E0
	GOTERM_BP_FAT	negative regulation of apoptosis	3	9.5E-1	1.0E0
	GOTERM_BP_FAT	negative regulation of programmed cell death	3	9.5E-1	1.0E0
	GOTERM_BP_FAT	negative regulation of cell death	3	9.5E-1	1.0E0
Annotation Cluster 23	Enrichment Score: 0.26		Count	P_Value	Benjamini
	GOTERM_BP_FAT	response to DNA damage stimulus	7	3.6E-1	9.7E-1
	GOTERM_BP_FAT	DNA repair	5	5.1E-1	9.9E-1
	GOTERM_BP_FAT	DNA metabolic process	7	6.5E-1	1.0E0
	GOTERM_BP_FAT	cellular response to stress	7	7.5E-1	1.0E0
Annotation Cluster 24	Enrichment Score: 0.25		Count	P_Value	Benjamini
	GOTERM_BP_FAT	intracellular transport	12	2.4E-1	9.2E-1
	GOTERM_BP_FAT	protein import	4	2.4E-1	9.2E-1
	GOTERM_BP_FAT	protein localization in organelle	4	3.0E-1	9.5E-1
	GOTERM_BP_FAT	protein targeting	4	5.3E-1	9.9E-1
	GOTERM_BP_FAT	intracellular protein transport	5	7.2E-1	1.0E0
	GOTERM_BP_FAT	cellular protein localization	5	7.9E-1	1.0E0
	GOTERM_BP_FAT	cellular macromolecule localization	5	7.9E-1	1.0E0
	GOTERM_BP_FAT	protein transport	7	9.4E-1	1.0E0
	GOTERM_BP_FAT	establishment of protein localization	7	9.4E-1	1.0E0
	GOTERM_BP_FAT	protein localization	8	9.5E-1	1.0E0
Annotation Cluster 25	Enrichment Score: 0.22		Count	P_Value	Benjamini
	GOTERM_MF_FAT	protein dimerization activity	8	5.6E-1	1.0E0
	GOTERM_MF_FAT	identical protein binding	9	6.0E-1	1.0E0
	GOTERM_MF_FAT	protein homodimerization activity	5	6.4E-1	1.0E0
Annotation Cluster 26	Enrichment Score: 0.2		Count	P_Value	Benjamini
	GOTERM_MF_FAT	transcription coactivator activity	6	1.5E-1	8.6E-1
	GOTERM_MF_FAT	transcription cofactor activity	7	3.3E-1	9.8E-1
	GOTERM_MF_FAT	transcription factor binding	8	5.0E-1	9.9E-1
	GOTERM_CC_FAT	transcription factor complex	4	6.0E-1	9.9E-1
	GOTERM_MF_FAT	transcription activator activity	6	6.2E-1	1.0E0
	GOTERM_MF_FAT	transcription regulator activity	13	9.8E-1	1.0E0
	GOTERM_MF_FAT	transcription factor activity	7	9.9E-1	1.0E0
	GOTERM_BP_FAT	regulation of RNA metabolic process	9	1.0E0	1.0E0
	GOTERM_BP_FAT	regulation of transcription	16	1.0E0	1.0E0
	GOTERM_BP_FAT	regulation of transcription, DNA-dependent	7	1.0E0	1.0E0
Annotation Cluster 27	Enrichment Score: 0.19		Count	P_Value	Benjamini
	GOTERM_CC_FAT	protein-DNA complex	3	3.6E-1	8.9E-1
	GOTERM_CC_FAT	chromosomal part	5	8.3E-1	1.0E0
	GOTERM_CC_FAT	chromosome	5	9.1E-1	1.0E0
Annotation Cluster 28	Enrichment Score: 0.16		Count	P_Value	Benjamini
	GOTERM_MF_FAT	mRNA binding	3	2.1E-1	9.3E-1
	GOTERM_BP_FAT	negative regulation of nucleobase, nucleoside, nucleotide and nucleic acid metabolic process	7	6.6E-1	1.0E0
	GOTERM_BP_FAT	negative regulation of nitrogen compound metabolic process	7	6.7E-1	1.0E0
	GOTERM_BP_FAT	negative regulation of RNA metabolic process	4	8.5E-1	1.0E0
	GOTERM_BP_FAT	negative regulation of macromolecule biosynthetic process	4	9.8E-1	1.0E0
	GOTERM_BP_FAT	negative regulation of cellular biosynthetic process	4	9.8E-1	1.0E0
	GOTERM_BP_FAT	negative regulation of biosynthetic process	4	9.8E-1	1.0E0
Annotation Cluster 29	Enrichment Score: 0.13		Count	P_Value	Benjamini
	GOTERM_BP_FAT	angiogenesis	3	5.8E-1	1.0E0
	GOTERM_BP_FAT	blood vessel morphogenesis	3	7.6E-1	1.0E0
	GOTERM_BP_FAT	blood vessel development	3	8.3E-1	1.0E0
	GOTERM_BP_FAT	vasculature development	3	8.4E-1	1.0E0
Annotation Cluster 30	Enrichment Score: 0.12		Count	P_Value	Benjamini
	GOTERM_BP_FAT	M phase	5	6.2E-1	1.0E0
	GOTERM_BP_FAT	cell cycle phase	6	6.3E-1	1.0E0
	GOTERM_BP_FAT	nuclear division	3	7.8E-1	1.0E0
	GOTERM_BP_FAT	mitosis	3	7.8E-1	1.0E0
	GOTERM_BP_FAT	M phase of mitotic cell cycle	3	7.9E-1	1.0E0
	GOTERM_BP_FAT	organelle fission	3	8.0E-1	1.0E0
	GOTERM_BP_FAT	cell division	3	9.0E-1	1.0E0
Annotation Cluster 31	Enrichment Score: 0.09		Count	P_Value	Benjamini
	GOTERM_BP_FAT	gamete generation	5	7.6E-1	1.0E0
	GOTERM_BP_FAT	male gamete generation	4	7.7E-1	1.0E0
	GOTERM_BP_FAT	spermatogenesis	4	7.7E-1	1.0E0
	GOTERM_BP_FAT	sexual reproduction	5	8.5E-1	1.0E0
	GOTERM_BP_FAT	reproductive process in a multicellular organism	5	8.8E-1	1.0E0
	GOTERM_BP_FAT	multicellular organism reproduction	5	8.8E-1	1.0E0
Annotation Cluster 32	Enrichment Score: 0.07		Count	P_Value	Benjamini
	GOTERM_MF_FAT	endopeptidase activity	5	7.2E-1	1.0E0
	GOTERM_MF_FAT	peptidase activity, acting on L-amino acid peptides	6	8.5E-1	1.0E0
	GOTERM_MF_FAT	peptidase activity	6	8.7E-1	1.0E0
	GOTERM_BP_FAT	proteolysis	10	9.4E-1	1.0E0
Annotation Cluster 33	Enrichment Score: 0.05		Count	P_Value	Benjamini
	GOTERM_BP_FAT	microtubule-based process	4	6.4E-1	1.0E0
	GOTERM_CC_FAT	microtubule cytoskeleton	4	9.9E-1	1.0E0
	GOTERM_CC_FAT	cytoskeletal part	6	1.0E0	1.0E0
	GOTERM_CC_FAT	cytoskeleton	7	1.0E0	1.0E0
Annotation Cluster 34	Enrichment Score: 0.05		Count	P_Value	Benjamini
	GOTERM_BP_FAT	inflammatory response	4	8.0E-1	1.0E0
	GOTERM_BP_FAT	immune response	7	8.9E-1	1.0E0
	GOTERM_BP_FAT	response to wounding	5	9.2E-1	1.0E0
	GOTERM_BP_FAT	defense response	4	9.9E-1	1.0E0
Annotation Cluster 35	Enrichment Score: 0.04		Count	P_Value	Benjamini
	GOTERM_BP_FAT	cytoskeleton organization	5	8.2E-1	1.0E0
	GOTERM_MF_FAT	actin binding	3	9.3E-1	1.0E0
	GOTERM_MF_FAT	cytoskeletal protein binding	4	9.6E-1	1.0E0
Annotation Cluster 36	Enrichment Score: 0.03		Count	P_Value	Benjamini
	GOTERM_BP_FAT	cell migration	3	8.8E-1	1.0E0
	GOTERM_BP_FAT	cell motility	3	9.1E-1	1.0E0
	GOTERM_BP_FAT	localization of cell	3	9.1E-1	1.0E0
	GOTERM_BP_FAT	cell motion	4	9.5E-1	1.0E0
	GOTERM_CC_FAT	extracellular region part	7	1.0E0	1.0E0
Annotation Cluster 37	Enrichment Score: 0.02		Count	P_Value	Benjamini
	GOTERM_CC_FAT	microsome	3	8.7E-1	1.0E0
	GOTERM_CC_FAT	vesicular fraction	3	8.8E-1	1.0E0
	GOTERM_CC_FAT	membrane fraction	3	1.0E0	1.0E0
	GOTERM_CC_FAT	insoluble fraction	3	1.0E0	1.0E0
	GOTERM_CC_FAT	cell fraction	4	1.0E0	1.0E0
Annotation Cluster 38	Enrichment Score: 0.02		Count	P_Value	Benjamini
	GOTERM_BP_FAT	regulation of protein kinase activity	3	9.4E-1	1.0E0
	GOTERM_BP_FAT	regulation of phosphorylation	4	9.4E-1	1.0E0
	GOTERM_BP_FAT	regulation of kinase activity	3	9.5E-1	1.0E0
	GOTERM_BP_FAT	regulation of phosphorus metabolic process	4	9.5E-1	1.0E0
	GOTERM_BP_FAT	regulation of phosphate metabolic process	4	9.5E-1	1.0E0
	GOTERM_BP_FAT	regulation of transferase activity	3	9.6E-1	1.0E0
Annotation Cluster 39	Enrichment Score: 0.01		Count	P_Value	Benjamini
	GOTERM_CC_FAT	proteinaceous extracellular matrix	3	9.5E-1	1.0E0
	GOTERM_CC_FAT	extracellular matrix	3	9.7E-1	1.0E0
	GOTERM_CC_FAT	extracellular region part	7	1.0E0	1.0E0
Annotation Cluster 40	Enrichment Score: 0.01		Count	P_Value	Benjamini
	GOTERM_MF_FAT	transition metal ion binding	31	9.0E-1	1.0E0
	GOTERM_MF_FAT	zinc ion binding	23	9.6E-1	1.0E0
	GOTERM_MF_FAT	metal ion binding	38	1.0E0	1.0E0
	GOTERM_MF_FAT	cation binding	38	1.0E0	1.0E0
	GOTERM_MF_FAT	ion binding	38	1.0E0	1.0E0
Annotation Cluster 41	Enrichment Score: 0.01		Count	P_Value	Benjamini
	GOTERM_BP_FAT	positive regulation of macromolecule metabolic process	9	8.8E-1	1.0E0
	GOTERM_BP_FAT	positive regulation of transcription	4	9.8E-1	1.0E0
	GOTERM_BP_FAT	positive regulation of gene expression	4	9.8E-1	1.0E0
	GOTERM_BP_FAT	positive regulation of nucleobase, nucleoside, nucleotide and nucleic acid metabolic process	4	9.9E-1	1.0E0
	GOTERM_BP_FAT	positive regulation of nitrogen compound metabolic process	4	9.9E-1	1.0E0
	GOTERM_BP_FAT	positive regulation of macromolecule biosynthetic process	4	9.9E-1	1.0E0
	GOTERM_BP_FAT	positive regulation of cellular biosynthetic process	4	9.9E-1	1.0E0
	GOTERM_BP_FAT	positive regulation of biosynthetic process	4	1.0E0	1.0E0
Annotation Cluster 42	Enrichment Score: 0.01		Count	P_Value	Benjamini
	GOTERM_CC_FAT	Golgi apparatus	9	9.5E-1	1.0E0
	GOTERM_CC_FAT	plasma membrane part	9	1.0E0	1.0E0
	GOTERM_CC_FAT	plasma membrane	14	1.0E0	1.0E0
Annotation Cluster 43	Enrichment Score: 0		Count	P_Value	Benjamini
	GOTERM_CC_FAT	cytoplasmic membrane-bounded vesicle	4	9.9E-1	1.0E0
	GOTERM_CC_FAT	membrane-bounded vesicle	4	9.9E-1	1.0E0
	GOTERM_CC_FAT	cytoplasmic vesicle	4	1.0E0	1.0E0
	GOTERM_CC_FAT	vesicle	4	1.0E0	1.0E0
Annotation Cluster 44	Enrichment Score: 0		Count	P_Value	Benjamini
	GOTERM_MF_FAT	magnesium ion binding	3	9.8E-1	1.0E0
	GOTERM_MF_FAT	ATP binding	7	1.0E0	1.0E0
	GOTERM_MF_FAT	adenyl ribonucleotide binding	7	1.0E0	1.0E0
	GOTERM_MF_FAT	adenyl nucleotide binding	7	1.0E0	1.0E0
	GOTERM_MF_FAT	purine nucleoside binding	7	1.0E0	1.0E0
	GOTERM_MF_FAT	nucleoside binding	7	1.0E0	1.0E0
	GOTERM_MF_FAT	purine ribonucleotide binding	7	1.0E0	1.0E0
	GOTERM_MF_FAT	ribonucleotide binding	7	1.0E0	1.0E0
	GOTERM_MF_FAT	purine nucleotide binding	7	1.0E0	1.0E0
	GOTERM_MF_FAT	nucleotide binding	9	1.0E0	1.0E0
Annotation Cluster 45	Enrichment Score: 0		Count	P_Value	Benjamini
	GOTERM_CC_FAT	integral to plasma membrane	4	1.0E0	1.0E0
	GOTERM_CC_FAT	intrinsic to plasma membrane	4	1.0E0	1.0E0
	GOTERM_CC_FAT	plasma membrane part	9	1.0E0	1.0E0

## Sheet: moR 72 unique genes up
ProbeID	Symbol	Entrez_Gene_ID	Definition
2320343	MAMLD1	10046	Homo sapiens mastermind-like domain containing 1 (MAMLD1), mRNA.
4780133	GBA	2629	Homo sapiens glucosidase, beta; acid (includes glucosylceramidase) (GBA), transcript variant 3, mRNA.
580048	GBA	2629	Homo sapiens glucosidase, beta; acid (includes glucosylceramidase) (GBA), transcript variant 3, mRNA.
4570181	GAS6	2621	Homo sapiens growth arrest-specific 6 (GAS6), mRNA.
7050433	RDH10	157506	Homo sapiens retinol dehydrogenase 10 (all-trans) (RDH10), mRNA.
2060477	AGPAT9	84803	Homo sapiens 1-acylglycerol-3-phosphate O-acyltransferase 9 (AGPAT9), mRNA.
6940164	LBH	81606	PREDICTED: Homo sapiens hypothetical protein DKFZp566J091 (LBH), mRNA.
1660019	SNCAIP	9627	Homo sapiens synuclein, alpha interacting protein (SNCAIP), mRNA.
6480315	GPBP1	65056	Homo sapiens GC-rich promoter binding protein 1 (GPBP1), mRNA.
6960379	SFRP1	6422	Homo sapiens secreted frizzled-related protein 1 (SFRP1), mRNA.
6860228	C5orf41	153222	Homo sapiens chromosome 5 open reading frame 41 (C5orf41), mRNA.
7330026	FRAT2	23401	Homo sapiens frequently rearranged in advanced T-cell lymphomas 2 (FRAT2), mRNA.
7380100	MCL1	4170	Homo sapiens myeloid cell leukemia sequence 1 (BCL2-related) (MCL1), transcript variant 1, mRNA.
360280	PNRC2	55629	Homo sapiens proline-rich nuclear receptor coactivator 2 (PNRC2), mRNA.
6590220	MEGF6	1953	Homo sapiens multiple EGF-like-domains 6 (MEGF6), mRNA.
6290603	EIF3B	8662	Homo sapiens eukaryotic translation initiation factor 3, subunit B (EIF3B), transcript variant 1, mRNA.
1570646	TFAP2A	7020	Homo sapiens transcription factor AP-2 alpha (activating enhancer binding protein 2 alpha) (TFAP2A), transcript variant 3, mRNA.
1070152	IL17RB	55540	Homo sapiens interleukin 17 receptor B (IL17RB), mRNA.
3390017	CNDP2	55748	Homo sapiens CNDP dipeptidase 2 (metallopeptidase M20 family) (CNDP2), mRNA.
5570102	DKK1	22943	Homo sapiens dickkopf homolog 1 (Xenopus laevis) (DKK1), mRNA.
6550048	DHCR7	1717	Homo sapiens 7-dehydrocholesterol reductase (DHCR7), mRNA.
6550196	CRK	1398	Homo sapiens v-crk sarcoma virus CT10 oncogene homolog (avian) (CRK), transcript variant II, mRNA.
6580400	FLJ10781	55228	Homo sapiens hypothetical protein FLJ10781 (FLJ10781), mRNA.
3370242	DKFZp761P0423	157285	PREDICTED: Homo sapiens hypothetical protein DKFZp761P0423 (DKFZp761P0423), mRNA.
6770673	SOCS2	8835	Homo sapiens suppressor of cytokine signaling 2 (SOCS2), mRNA.
4850307	LOC100131261	100131261	PREDICTED: Homo sapiens similar to hCG1728885 (LOC100131261), mRNA.
2100722	VAMP4	8674	Homo sapiens vesicle-associated membrane protein 4 (VAMP4), mRNA.
3870520	VAMP4	8674	Homo sapiens vesicle-associated membrane protein 4 (VAMP4), mRNA.
5870605			full-length cDNA clone CS0DF005YI08 of Fetal brain of Homo sapiens (human)
3610722	CLCC1	23155	Homo sapiens chloride channel CLIC-like 1 (CLCC1), transcript variant 2, mRNA.
4150300	LOC652815	652815	PREDICTED: Homo sapiens similar to FK506-binding protein 9 precursor (Peptidyl-prolyl cis-trans isomerase) (PPIase) (Rotamase) (LOC652815), mRNA.
5810564	CMBL	134147	Homo sapiens carboxymethylenebutenolidase homolog (Pseudomonas) (CMBL), mRNA.
6660630	TP53INP1	94241	Homo sapiens tumor protein p53 inducible nuclear protein 1 (TP53INP1), mRNA.
5420538	TP53INP1	94241	Homo sapiens tumor protein p53 inducible nuclear protein 1 (TP53INP1), mRNA.
3190021	NTN4	59277	Homo sapiens netrin 4 (NTN4), mRNA.
2370450	ASPH	444	Homo sapiens aspartate beta-hydroxylase (ASPH), transcript variant 2, mRNA.
1070292	GPSM2	29899	Homo sapiens G-protein signalling modulator 2 (AGS3-like, C. elegans) (GPSM2), mRNA.
4230451	ARMCX1	51309	Homo sapiens armadillo repeat containing, X-linked 1 (ARMCX1), mRNA.
1240553	SESN1	27244	Homo sapiens sestrin 1 (SESN1), mRNA.
5080601	COBLL1	22837	Homo sapiens COBL-like 1 (COBLL1), mRNA.
840369	LBH	81606	Homo sapiens limb bud and heart development homolog (mouse) (LBH), mRNA.
5890619	ASPH	444	Homo sapiens aspartate beta-hydroxylase (ASPH), transcript variant 1, mRNA.
2710735	RASD1	51655	Homo sapiens RAS, dexamethasone-induced 1 (RASD1), mRNA.
5080482	TNPO1	3842	Homo sapiens transportin 1 (TNPO1), transcript variant 2, mRNA.
7100215	TSC22D2	9819	Homo sapiens TSC22 domain family, member 2 (TSC22D2), mRNA.
4640386	WNT2B	7482	Homo sapiens wingless-type MMTV integration site family, member 2B (WNT2B), transcript variant WNT-2B2, mRNA.
2370204	CCNC	892	Homo sapiens cyclin C (CCNC), transcript variant 2, mRNA.
7560180	SUSD1	64420	Homo sapiens sushi domain containing 1 (SUSD1), mRNA.
4070241	GYG2	8908	Homo sapiens glycogenin 2 (GYG2), transcript variant 2, mRNA.
360128	KIT	3815	Homo sapiens v-kit Hardy-Zuckerman 4 feline sarcoma viral oncogene homolog (KIT), transcript variant 2, mRNA.
1470475	SECISBP2	79048	Homo sapiens SECIS binding protein 2 (SECISBP2), mRNA.
130142	LOC653994	653994	PREDICTED: Homo sapiens similar to Eukaryotic translation initiation factor 4H (eIF-4H) (Williams-Beuren syndrome chromosome region 1 protein homolog), transcript variant 2 (LOC653994), mRNA.
2940577	HSPA2	3306	Homo sapiens heat shock 70kDa protein 2 (HSPA2), mRNA.
6290519	STOM	2040	Homo sapiens stomatin (STOM), transcript variant 1, mRNA.
780021	OPN3	23596	Homo sapiens opsin 3 (OPN3), mRNA.
2640441	PRAGMIN	157285	Homo sapiens homolog of rat pragma of Rnd2 (PRAGMIN), mRNA.
5550431	MMD	23531	Homo sapiens monocyte to macrophage differentiation-associated (MMD), mRNA.
1770224	PRICKLE1	144165	Homo sapiens prickle homolog 1 (Drosophila) (PRICKLE1), mRNA.
2750088	LOC730996	730996	PREDICTED: Homo sapiens similar to chromosome 1 open reading frame 80 (LOC730996), mRNA.
2230519	PNMAL1	55228	Homo sapiens PNMA-like 1 (PNMAL1), transcript variant 1, mRNA.
4610070	ITSN1	6453	Homo sapiens intersectin 1 (SH3 domain protein) (ITSN1), transcript variant 2, mRNA.
5360678	DHCR7	1717	Homo sapiens 7-dehydrocholesterol reductase (DHCR7), transcript variant 1, mRNA.
1940647	HBP1	26959	Homo sapiens HMG-box transcription factor 1 (HBP1), mRNA.
5220491	VGLL4	9686	Homo sapiens vestigial like 4 (Drosophila) (VGLL4), mRNA.
2810673	HOXA9	3205	Homo sapiens homeobox A9 (HOXA9), mRNA.
1190735	APP	351	Homo sapiens amyloid beta (A4) precursor protein (APP), transcript variant 1, mRNA.
1770397	CCNC	892	Homo sapiens cyclin C (CCNC), transcript variant 1, mRNA.
4230653	CCNC	892	Homo sapiens cyclin C (CCNC), transcript variant 1, mRNA.
3780762	FAM44B	91272	Homo sapiens family with sequence similarity 44, member B (FAM44B), mRNA.
6380370	CCND3	896	Homo sapiens cyclin D3 (CCND3), mRNA.
7330044	DYNLT3	6990	Homo sapiens dynein, light chain, Tctex-type 3 (DYNLT3), mRNA.
3450458	SH2D5	400745	PREDICTED: Homo sapiens SH2 domain containing 5 (SH2D5), mRNA.

## Sheet: DAVID GOs moR unique up
gene list: 72 moR unique genes up
Functional Annotation Clustering
Current Background: Homo sapiens
57/72 genes recognized by DAVID
Statistical test: a modified Fisher Exact P-Value (EASE score)
14 Cluster(s)
Annotation Cluster 1	Enrichment Score: 1.3		Count	P_Value	Benjamini
	GOTERM_BP_FAT	appendage morphogenesis	3	4.8E-2	1.0E0
	GOTERM_BP_FAT	limb morphogenesis	3	4.8E-2	1.0E0
	GOTERM_BP_FAT	appendage development	3	5.2E-2	9.9E-1
	GOTERM_BP_FAT	limb development	3	5.2E-2	9.9E-1
Annotation Cluster 2	Enrichment Score: 1.05		Count	P_Value	Benjamini
	GOTERM_BP_FAT	cell cycle process	6	4.9E-2	1.0E0
	GOTERM_BP_FAT	cell cycle arrest	3	5.2E-2	9.9E-1
	GOTERM_BP_FAT	cell cycle	7	5.5E-2	9.9E-1
	GOTERM_BP_FAT	cell cycle phase	3	4.3E-1	1.0E0
Annotation Cluster 3	Enrichment Score: 0.93		Count	P_Value	Benjamini
	GOTERM_CC_FAT	endomembrane system	8	5.5E-3	4.8E-1
	GOTERM_CC_FAT	endoplasmic reticulum membrane	3	1.7E-1	9.6E-1
	GOTERM_CC_FAT	nuclear envelope-endoplasmic reticulum network	3	1.9E-1	9.6E-1
	GOTERM_CC_FAT	organelle membrane	6	1.9E-1	9.2E-1
	GOTERM_CC_FAT	endoplasmic reticulum part	3	2.6E-1	8.5E-1
	GOTERM_CC_FAT	endoplasmic reticulum	5	2.8E-1	8.4E-1
Annotation Cluster 4	Enrichment Score: 0.88		Count	P_Value	Benjamini
	GOTERM_CC_FAT	lysosome	3	1.2E-1	9.5E-1
	GOTERM_CC_FAT	lytic vacuole	3	1.2E-1	9.5E-1
	GOTERM_CC_FAT	vacuole	3	1.6E-1	9.7E-1
Annotation Cluster 5	Enrichment Score: 0.71		Count	P_Value	Benjamini
	GOTERM_CC_FAT	nuclear envelope	3	1.1E-1	9.7E-1
	GOTERM_CC_FAT	organelle membrane	6	1.9E-1	9.2E-1
	GOTERM_CC_FAT	organelle envelope	4	2.5E-1	8.7E-1
	GOTERM_CC_FAT	envelope	4	2.5E-1	8.6E-1
Annotation Cluster 6	Enrichment Score: 0.68		Count	P_Value	Benjamini
	GOTERM_BP_FAT	negative regulation of programmed cell death	5	3.8E-2	1.0E0
	GOTERM_BP_FAT	negative regulation of cell death	5	3.8E-2	1.0E0
	GOTERM_BP_FAT	regulation of programmed cell death	7	6.6E-2	9.9E-1
	GOTERM_BP_FAT	regulation of cell death	7	6.7E-2	9.8E-1
	GOTERM_CC_FAT	cell fraction	7	8.0E-2	9.6E-1
	GOTERM_BP_FAT	cell death	6	1.1E-1	1.0E0
	GOTERM_BP_FAT	death	6	1.1E-1	1.0E0
	GOTERM_BP_FAT	negative regulation of apoptosis	4	1.3E-1	9.9E-1
	GOTERM_BP_FAT	regulation of apoptosis	6	1.5E-1	1.0E0
	GOTERM_BP_FAT	anti-apoptosis	3	1.7E-1	9.9E-1
	GOTERM_BP_FAT	programmed cell death	5	1.7E-1	9.9E-1
	GOTERM_CC_FAT	membrane fraction	5	1.9E-1	9.4E-1
	GOTERM_CC_FAT	cytoplasmic membrane-bounded vesicle	4	2.0E-1	8.9E-1
	GOTERM_CC_FAT	insoluble fraction	5	2.1E-1	8.8E-1
	GOTERM_CC_FAT	membrane-bounded vesicle	4	2.1E-1	8.7E-1
	GOTERM_CC_FAT	cytoplasmic vesicle	4	2.7E-1	8.3E-1
	GOTERM_CC_FAT	vesicle	4	2.9E-1	8.3E-1
	GOTERM_BP_FAT	induction of apoptosis	3	3.1E-1	1.0E0
	GOTERM_BP_FAT	induction of programmed cell death	3	3.2E-1	1.0E0
	GOTERM_BP_FAT	apoptosis	4	3.6E-1	1.0E0
	GOTERM_CC_FAT	plasma membrane part	8	4.3E-1	9.4E-1
	GOTERM_CC_FAT	integral to plasma membrane	5	4.3E-1	9.3E-1
	GOTERM_CC_FAT	intrinsic to plasma membrane	5	4.5E-1	9.3E-1
	GOTERM_BP_FAT	positive regulation of apoptosis	3	4.5E-1	1.0E0
	GOTERM_BP_FAT	positive regulation of programmed cell death	3	4.6E-1	1.0E0
	GOTERM_BP_FAT	positive regulation of cell death	3	4.6E-1	1.0E0
	GOTERM_BP_FAT	intracellular signaling cascade	5	6.6E-1	1.0E0
	GOTERM_CC_FAT	plasma membrane	10	7.8E-1	9.9E-1
Annotation Cluster 7	Enrichment Score: 0.49		Count	P_Value	Benjamini
	GOTERM_BP_FAT	response to light stimulus	3	8.6E-2	9.9E-1
	GOTERM_BP_FAT	response to radiation	3	1.6E-1	9.9E-1
	GOTERM_BP_FAT	response to abiotic stimulus	3	3.8E-1	1.0E0
	GOTERM_CC_FAT	plasma membrane part	8	4.3E-1	9.4E-1
	GOTERM_BP_FAT	cognition	4	6.3E-1	1.0E0
	GOTERM_BP_FAT	neurological system process	4	8.2E-1	1.0E0
Annotation Cluster 8	Enrichment Score: 0.33		Count	P_Value	Benjamini
	GOTERM_BP_FAT	regulation of protein kinase activity	3	3.5E-1	1.0E0
	GOTERM_BP_FAT	regulation of kinase activity	3	3.6E-1	1.0E0
	GOTERM_BP_FAT	regulation of transferase activity	3	3.8E-1	1.0E0
	GOTERM_BP_FAT	regulation of phosphorylation	3	5.0E-1	1.0E0
	GOTERM_BP_FAT	regulation of phosphate metabolic process	3	5.2E-1	1.0E0
	GOTERM_BP_FAT	regulation of phosphorus metabolic process	3	5.2E-1	1.0E0
	GOTERM_BP_FAT	positive regulation of macromolecule metabolic process	3	8.2E-1	1.0E0
Annotation Cluster 9	Enrichment Score: 0.32		Count	P_Value	Benjamini
	GOTERM_BP_FAT	regulation of transcription	14	1.2E-1	9.9E-1
	GOTERM_MF_FAT	transcription factor activity	4	4.9E-1	1.0E0
	GOTERM_MF_FAT	transcription regulator activity	5	5.9E-1	1.0E0
	GOTERM_BP_FAT	regulation of transcription, DNA-dependent	7	6.1E-1	1.0E0
	GOTERM_MF_FAT	DNA binding	7	6.2E-1	1.0E0
	GOTERM_BP_FAT	regulation of RNA metabolic process	7	6.4E-1	1.0E0
	GOTERM_BP_FAT	regulation of transcription from RNA polymerase II promoter	3	7.4E-1	1.0E0
Annotation Cluster 10	Enrichment Score: 0.14		Count	P_Value	Benjamini
	GOTERM_CC_FAT	microtubule cytoskeleton	3	4.6E-1	9.3E-1
	GOTERM_CC_FAT	cytoskeletal part	3	7.6E-1	9.9E-1
	GOTERM_CC_FAT	cytoskeleton	4	7.6E-1	9.9E-1
	GOTERM_CC_FAT	intracellular non-membrane-bounded organelle	6	8.8E-1	1.0E0
	GOTERM_CC_FAT	non-membrane-bounded organelle	6	8.8E-1	1.0E0
Annotation Cluster 11	Enrichment Score: 0.12		Count	P_Value	Benjamini
	GOTERM_MF_FAT	calcium ion binding	5	2.3E-1	1.0E0
	GOTERM_MF_FAT	cation binding	9	9.2E-1	1.0E0
	GOTERM_MF_FAT	ion binding	9	9.3E-1	1.0E0
	GOTERM_MF_FAT	metal ion binding	8	9.6E-1	1.0E0
	GOTERM_MF_FAT	transition metal ion binding	4	9.9E-1	1.0E0
	GOTERM_MF_FAT	zinc ion binding	3	9.9E-1	1.0E0
Annotation Cluster 12	Enrichment Score: 0.1		Count	P_Value	Benjamini
	GOTERM_BP_FAT	protein amino acid phosphorylation	3	6.9E-1	1.0E0
	GOTERM_BP_FAT	phosphorylation	3	7.9E-1	1.0E0
	GOTERM_BP_FAT	phosphorus metabolic process	3	8.7E-1	1.0E0
	GOTERM_BP_FAT	phosphate metabolic process	3	8.7E-1	1.0E0
Annotation Cluster 13	Enrichment Score: 0.09		Count	P_Value	Benjamini
	GOTERM_CC_FAT	organelle lumen	5	7.7E-1	9.9E-1
	GOTERM_CC_FAT	membrane-enclosed lumen	5	7.9E-1	9.9E-1
	GOTERM_CC_FAT	nuclear lumen	4	7.9E-1	9.9E-1
	GOTERM_CC_FAT	intracellular organelle lumen	4	8.9E-1	1.0E0
Annotation Cluster 14	Enrichment Score: 0.04		Count	P_Value	Benjamini
	GOTERM_MF_FAT	nucleotide binding	5	8.8E-1	1.0E0
	GOTERM_MF_FAT	ribonucleotide binding	4	8.9E-1	1.0E0
	GOTERM_MF_FAT	purine ribonucleotide binding	4	8.9E-1	1.0E0
	GOTERM_MF_FAT	purine nucleotide binding	4	9.1E-1	1.0E0
	GOTERM_MF_FAT	ATP binding	3	9.2E-1	1.0E0
	GOTERM_MF_FAT	adenyl ribonucleotide binding	3	9.2E-1	1.0E0
	GOTERM_MF_FAT	adenyl nucleotide binding	3	9.4E-1	1.0E0
	GOTERM_MF_FAT	purine nucleoside binding	3	9.4E-1	1.0E0
	GOTERM_MF_FAT	nucleoside binding	3	9.4E-1	1.0E0

## Sheet: moR 239 unique genes down 
ProbeID	Symbol	Entrez_Gene_ID	Definition
20450	LOC729580	729580	PREDICTED: Homo sapiens hypothetical LOC729580 (LOC729580), mRNA.
2640358	LOC730288	730288	PREDICTED: Homo sapiens similar to 40S ribosomal protein S28 (LOC730288), mRNA.
5420474	HSPBL2	653553	Homo sapiens heat shock 27kDa protein-like 2 pseudogene (HSPBL2), non-coding RNA.
3130576	CHIC2	26511	Homo sapiens cysteine-rich hydrophobic domain 2 (CHIC2), mRNA.
2100341	C14orf2	9556	Homo sapiens chromosome 14 open reading frame 2 (C14orf2), mRNA.
2060465	UBE2E1	7324	Homo sapiens ubiquitin-conjugating enzyme E2E 1 (UBC4/5 homolog, yeast) (UBE2E1), transcript variant 2, mRNA.
4560164	PDLIM7	9260	Homo sapiens PDZ and LIM domain 7 (enigma) (PDLIM7), transcript variant 4, mRNA.
5130414	C9orf23	138716	Homo sapiens chromosome 9 open reading frame 23 (C9orf23), transcript variant 1, mRNA.
650598	CSTF3	1479	Homo sapiens cleavage stimulation factor, 3' pre-RNA, subunit 3, 77kDa (CSTF3), transcript variant 2, mRNA.
6400025	C16orf61	56942	Homo sapiens chromosome 16 open reading frame 61 (C16orf61), mRNA.
7050189	PRPF19	27339	Homo sapiens PRP19/PSO4 pre-mRNA processing factor 19 homolog (S. cerevisiae) (PRPF19), mRNA.
4570301	LOC100130775	100130775	PREDICTED: Homo sapiens misc_RNA (LOC100130775), miscRNA.
430196	MRPL14	64928	Homo sapiens mitochondrial ribosomal protein L14 (MRPL14), nuclear gene encoding mitochondrial protein, mRNA.
2450358	CKS1B	1163	Homo sapiens CDC28 protein kinase regulatory subunit 1B (CKS1B), mRNA.
6550377	LOC650157	650157	PREDICTED: Homo sapiens similar to TRIM5/CypA fusion protein (LOC650157), mRNA.
2810482	AHNAK	79026	Homo sapiens AHNAK nucleoprotein (AHNAK), transcript variant 1, mRNA.
7560100	NUDT11	55190	Homo sapiens nudix (nucleoside diphosphate linked moiety X)-type motif 11 (NUDT11), mRNA.
580358	FABP5L2	729163	PREDICTED: Homo sapiens fatty acid binding protein 5-like 2 (FABP5L2), mRNA.
4890689	CTHRC1	115908	Homo sapiens collagen triple helix repeat containing 1 (CTHRC1), mRNA.
1450156	MAGOH	4116	Homo sapiens mago-nashi homolog, proliferation-associated (Drosophila) (MAGOH), mRNA.
6520661	C9orf46	55848	Homo sapiens chromosome 9 open reading frame 46 (C9orf46), mRNA.
1090653	C1orf133	574036	Homo sapiens chromosome 1 open reading frame 133 (C1orf133), non-coding RNA. XM_001720763
1510609	NME1-NME2	654364	Homo sapiens NME1-NME2 readthrough (NME1-NME2), mRNA.
3140138	C12orf47	51275	PREDICTED: Homo sapiens chromosome 12 open reading frame 47 (C12orf47), misc RNA.
3180600	PNPO	55163	Homo sapiens pyridoxamine 5'-phosphate oxidase (PNPO), mRNA.
540280	LOC644790	644790	PREDICTED: Homo sapiens hypothetical LOC644790 (LOC644790), mRNA.
7050576	COMMD7	149951	Homo sapiens COMM domain containing 7 (COMMD7), transcript variant 2, mRNA.
6900630	ATP2B4	493	Homo sapiens ATPase, Ca++ transporting, plasma membrane 4 (ATP2B4), transcript variant 2, mRNA.
4260368	UBE2C	11065	Homo sapiens ubiquitin-conjugating enzyme E2C (UBE2C), transcript variant 3, mRNA.
5270735	LOC100130892	100130892	PREDICTED: Homo sapiens hypothetical protein LOC100130892 (LOC100130892), mRNA.
2340026	MRPL18	29074	Homo sapiens mitochondrial ribosomal protein L18 (MRPL18), nuclear gene encoding mitochondrial protein, mRNA.
7040544	CCDC53	51019	Homo sapiens coiled-coil domain containing 53 (CCDC53), mRNA.
2360091	RNU1G2	26864	Homo sapiens RNA, U1G2 small nuclear (RNU1G2), small nuclear RNA.
2970025	SEPW1	6415	Homo sapiens selenoprotein W, 1 (SEPW1), mRNA.
3290025	LOC730074	730074	PREDICTED: Homo sapiens hypothetical LOC730074 (LOC730074), mRNA.
70368	C21orf34	388815	Homo sapiens chromosome 21 open reading frame 34 (C21orf34), transcript variant 3, mRNA.
4780040	MRPL41	64975	Homo sapiens mitochondrial ribosomal protein L41 (MRPL41), nuclear gene encoding mitochondrial protein, mRNA.
5700709	LOC647037	647037	PREDICTED: Homo sapiens similar to Peptidyl-prolyl cis-trans isomerase NIMA-interacting 4 (Rotamase Pin4) (PPIase Pin4) (Parvulin 14) (Par14) (Peptidyl-prolyl cis/trans isomerase EPVH) (hPar14) (LOC647037), mRNA.
6400128	PNKD	25953	Homo sapiens paroxysmal nonkinesigenic dyskinesia (PNKD), transcript variant 1, mRNA.
6380220	Magmas	51025	Homo sapiens mitochondria-associated protein involved in granulocyte-macrophage colony-stimulating factor signal transduction (Magmas), nuclear gene encoding mitochondrial protein, mRNA.
1340575	LOC100130715	100130715	PREDICTED: Homo sapiens misc_RNA (LOC100130715), miscRNA.
1470184	CLSTN1	22883	Homo sapiens calsyntenin 1 (CLSTN1), transcript variant 1, mRNA.
5090053	FDX1L	112812	Homo sapiens ferredoxin 1-like (FDX1L), mRNA.
4390487	RAB13	5872	Homo sapiens RAB13, member RAS oncogene family (RAB13), mRNA.
7000722	NEDD8	4738	Homo sapiens neural precursor cell expressed, developmentally down-regulated 8 (NEDD8), mRNA.
4590403	PPDPF	79144	Homo sapiens pancreatic progenitor cell differentiation and proliferation factor homolog (zebrafish) (PPDPF), mRNA.
5550673	SIVA	10572	Homo sapiens CD27-binding (Siva) protein (SIVA), transcript variant 1, mRNA.
3180731	MGST1	4257	Homo sapiens microsomal glutathione S-transferase 1 (MGST1), transcript variant 1b, mRNA.
3940736	NME2	4831	Homo sapiens non-metastatic cells 2, protein (NM23B) expressed in (NME2), transcript variant 3, mRNA.
4590228	GLRX	2745	Homo sapiens glutaredoxin (thioltransferase) (GLRX), mRNA.
4860563	NDUFAB1	4706	Homo sapiens NADH dehydrogenase (ubiquinone) 1, alpha/beta subcomplex, 1, 8kDa (NDUFAB1), mRNA.
5310471	UBE2C	11065	Homo sapiens ubiquitin-conjugating enzyme E2C (UBE2C), transcript variant 6, mRNA.
5080768	LOC653147	653147	Homo sapiens hCG1995786 (LOC653147), mRNA.
4070376	NCRNA00219	114915	Homo sapiens non-protein coding RNA 219 (NCRNA00219), non-coding RNA.
3930653	C7orf44	55744	Homo sapiens chromosome 7 open reading frame 44 (C7orf44), mRNA.
730221	PTPLA	9200	Homo sapiens protein tyrosine phosphatase-like (proline instead of catalytic arginine), member A (PTPLA), mRNA.
3130291	C12orf57	113246	Homo sapiens chromosome 12 open reading frame 57 (C12orf57), mRNA.
1470332	FXYD5	53827	Homo sapiens FXYD domain containing ion transport regulator 5 (FXYD5), transcript variant 1, mRNA.
2350465	RPL29	6159	Homo sapiens ribosomal protein L29 (RPL29), mRNA.
2360445	NHP2L1	4809	Homo sapiens NHP2 non-histone chromosome protein 2-like 1 (S. cerevisiae) (NHP2L1), transcript variant 1, mRNA.
6840477			AGENCOURT_14535501 NIH_MGC_191 Homo sapiens cDNA clone IMAGE:30415823 5, mRNA sequence
4890706	DR1	1810	Homo sapiens down-regulator of transcription 1, TBP-binding (negative cofactor 2) (DR1), mRNA.
1990491	AK2	204	Homo sapiens adenylate kinase 2 (AK2), transcript variant AK2A, mRNA.
3890360	LOC439953	439953	PREDICTED: Homo sapiens misc_RNA (LOC439953), miscRNA.
4670487	SIVA	10572	Homo sapiens CD27-binding (Siva) protein (SIVA), transcript variant 2, mRNA.
4260397	LOC727821	727821	PREDICTED: Homo sapiens misc_RNA (LOC727821), miscRNA.
4060255	ZNRD1	30834	Homo sapiens zinc ribbon domain containing 1 (ZNRD1), transcript variant a, mRNA.
2940079	ENY2	56943	Homo sapiens enhancer of yellow 2 homolog (Drosophila) (ENY2), mRNA.
4050270	LOC652481	652481	PREDICTED: Homo sapiens similar to Mitochondrial import inner membrane translocase subunit Tim23 (LOC652481), mRNA.
6250292	LOC646753	646753	PREDICTED: Homo sapiens similar to ribosomal protein S26 (LOC646753), mRNA.
6620528	MT1X	4501	Homo sapiens metallothionein 1X (MT1X), mRNA.
1470427	ALDH4A1	8659	Homo sapiens aldehyde dehydrogenase 4 family, member A1 (ALDH4A1), nuclear gene encoding mitochondrial protein, transcript variant P5CDhS, mRNA.
3990202	HMGB1L1	10357	Homo sapiens high-mobility group box 1-like 1 (HMGB1L1), mRNA.
6330039	HMGB1L1	10357	Homo sapiens high-mobility group box 1-like 1 (HMGB1L1), mRNA.
6380259	LOC729217	729217	PREDICTED: Homo sapiens misc_RNA (LOC729217), miscRNA.
3120079	SDF2L1	23753	Homo sapiens stromal cell-derived factor 2-like 1 (SDF2L1), mRNA.
3890025	TMSL3	7117	Homo sapiens thymosin-like 3 (TMSL3), mRNA.
1660703	MGC72080	389538	Homo sapiens MGC72080 pseudogene (MGC72080) on chromosome 7.
770437	LOC652864	652864	PREDICTED: Homo sapiens similar to Mitochondrial import inner membrane translocase subunit Tim23 (LOC652864), mRNA.
5490341	CLEC2D	29121	Homo sapiens C-type lectin domain family 2, member D (CLEC2D), transcript variant 1, mRNA.
2370093	COMMD4	54939	Homo sapiens COMM domain containing 4 (COMMD4), mRNA.
6420242	FIS1	51024	Homo sapiens fission 1 (mitochondrial outer membrane) homolog (S. cerevisiae) (FIS1), nuclear gene encoding mitochondrial protein, mRNA.
130390	OLFML1	283298	Homo sapiens olfactomedin-like 1 (OLFML1), mRNA.
4830377	LOC100131787	100131787	PREDICTED: Homo sapiens misc_RNA (LOC100131787), miscRNA.
270215	ARSB	411	Homo sapiens arylsulfatase B (ARSB), transcript variant 1, mRNA.
6200468	CKS2	1164	Homo sapiens CDC28 protein kinase regulatory subunit 2 (CKS2), mRNA.
780528	CKS2	1164	Homo sapiens CDC28 protein kinase regulatory subunit 2 (CKS2), mRNA.
2350368	RPF2	84154	Homo sapiens ribosome production factor 2 homolog (S. cerevisiae) (RPF2), mRNA.
430553	DCTN6	10671	Homo sapiens dynactin 6 (DCTN6), mRNA.
1470520	CMTM6	54918	Homo sapiens CKLF-like MARVEL transmembrane domain containing 6 (CMTM6), mRNA.
3170605	IKBIP	121457	Homo sapiens IKBKB interacting protein (IKBIP), transcript variant 1, mRNA.
2710161	SELK	58515	Homo sapiens selenoprotein K (SELK), mRNA.
2120377	LOC100130561	100130561	PREDICTED: Homo sapiens similar to high-mobility group (nonhistone chromosomal) protein 1-like 10, transcript variant 2 (LOC100130561), mRNA.
1110575	NDUFC1	4717	Homo sapiens NADH dehydrogenase (ubiquinone) 1, subcomplex unknown, 1, 6kDa (NDUFC1), mRNA.
290180	LOC647030	647030	PREDICTED: Homo sapiens misc_RNA (LOC647030), miscRNA.
5390095	RASSF2	9770	Homo sapiens Ras association (RalGDS/AF-6) domain family 2 (RASSF2), transcript variant 2, mRNA.
5360326	SIP1	8487	Homo sapiens survival of motor neuron protein interacting protein 1 (SIP1), transcript variant beta, mRNA.
5560543	CBR3	874	Homo sapiens carbonyl reductase 3 (CBR3), mRNA.
7100717	RPS15A	6210	Homo sapiens ribosomal protein S15a (RPS15A), transcript variant 2, mRNA.
650259	ATP5J	522	Homo sapiens ATP synthase, H+ transporting, mitochondrial F0 complex, subunit F6 (ATP5J), nuclear gene encoding mitochondrial protein, transcript variant 1, mRNA.
4480128	LOC100134273	100134273	PREDICTED: Homo sapiens similar to mCG7602 (LOC100134273), mRNA.
3990619	TOP2A	7153	Homo sapiens topoisomerase (DNA) II alpha 170kDa (TOP2A), mRNA.
5550612	BRP44	25874	Homo sapiens brain protein 44 (BRP44), transcript variant 2, mRNA.
3310241	LOC100131971	100131971	PREDICTED: Homo sapiens similar to 40S ribosomal protein S26 (LOC100131971), mRNA.
5090731	CRIPT	9419	Homo sapiens cysteine-rich PDZ-binding protein (CRIPT), mRNA.
4900328	LOC728324	728324	PREDICTED: Homo sapiens misc_RNA (LOC728324), miscRNA.
6660196	SHFM1	7979	Homo sapiens split hand/foot malformation (ectrodactyly) type 1 (SHFM1), mRNA.
2650193	SDC4	6385	Homo sapiens syndecan 4 (SDC4), mRNA.
4590494	YIF1A	10897	Homo sapiens Yip1 interacting factor homolog A (S. cerevisiae) (YIF1A), mRNA.
3310376	TIMM10	26519	Homo sapiens translocase of inner mitochondrial membrane 10 homolog (yeast) (TIMM10), nuclear gene encoding mitochondrial protein, mRNA.
2100470	TIMM17B	10245	Homo sapiens translocase of inner mitochondrial membrane 17 homolog B (yeast) (TIMM17B), nuclear gene encoding mitochondrial protein, mRNA.
7330392	TAP1	6890	Homo sapiens transporter 1, ATP-binding cassette, sub-family B (MDR/TAP) (TAP1), mRNA.
3140390	PON2	5445	Homo sapiens paraoxonase 2 (PON2), transcript variant 1, mRNA.
3390477	C17orf79	55352	Homo sapiens chromosome 17 open reading frame 79 (C17orf79), mRNA.
1780259	CCDC109B	55013	Homo sapiens coiled-coil domain containing 109B (CCDC109B), mRNA.
540215	C6orf173	387103	Homo sapiens chromosome 6 open reading frame 173 (C6orf173), mRNA.
5890368	LOC653377	653377	PREDICTED: Homo sapiens similar to family with sequence similarity 36, member A (LOC653377), mRNA.
2570379	LOC100130932	100130932	PREDICTED: Homo sapiens similar to Sm protein G (LOC100130932), mRNA.
6020066	LOC651202	651202	PREDICTED: Homo sapiens similar to large subunit ribosomal protein L36a (LOC651202), mRNA.
2230167	LOC653773	653773	PREDICTED: Homo sapiens similar to ribosomal protein L31 (LOC653773), mRNA.
4180445	C9orf142	286257	Homo sapiens chromosome 9 open reading frame 142 (C9orf142), mRNA.
4220091	TSPO	706	Homo sapiens translocator protein (18kDa) (TSPO), transcript variant PBR-S, mRNA.
5290162	LOC728324	728324	PREDICTED: Homo sapiens misc_RNA (LOC728324), miscRNA.
4210192	DCTPP1	79077	Homo sapiens dCTP pyrophosphatase 1 (DCTPP1), mRNA.
4060209	LOC643911	643911	PREDICTED: Homo sapiens hCG1815491 (LOC643911), miscRNA.
6400332	CNIH4	29097	Homo sapiens cornichon homolog 4 (Drosophila) (CNIH4), mRNA.
2060612	MRPL27	51264	Homo sapiens mitochondrial ribosomal protein L27 (MRPL27), nuclear gene encoding mitochondrial protein, transcript variant 2, mRNA.
4570136	NHP2	55651	Homo sapiens NHP2 ribonucleoprotein homolog (yeast) (NHP2), transcript variant 2, mRNA.
2760673	NHP2	55651	Homo sapiens NHP2 ribonucleoprotein homolog (yeast) (NHP2), transcript variant 2, mRNA.
6550291	NHP2	55651	Homo sapiens NHP2 ribonucleoprotein homolog (yeast) (NHP2), transcript variant 2, mRNA.
2940022	BLVRA	644	Homo sapiens biliverdin reductase A (BLVRA), mRNA.
2760370	CALR	811	Homo sapiens calreticulin (CALR), mRNA.
3460324	PSMA3	5684	Homo sapiens proteasome (prosome, macropain) subunit, alpha type, 3 (PSMA3), transcript variant 2, mRNA.
650347	NUDT1	4521	Homo sapiens nudix (nucleoside diphosphate linked moiety X)-type motif 1 (NUDT1), transcript variant 2A, mRNA.
2100196	ISG15	9636	Homo sapiens ISG15 ubiquitin-like modifier (ISG15), mRNA.
1410079	CDC26	246184	Homo sapiens cell division cycle 26 homolog (S. cerevisiae) (CDC26), mRNA.
1470632	UROS	7390	Homo sapiens uroporphyrinogen III synthase (congenital erythropoietic porphyria) (UROS), mRNA.
6270382	DYRK4	8798	Homo sapiens dual-specificity tyrosine-(Y)-phosphorylation regulated kinase 4 (DYRK4), mRNA.
6960025	DPY30	84661	Homo sapiens dpy-30 homolog (C. elegans) (DPY30), mRNA.
6900392	CHCHD5	84269	Homo sapiens coiled-coil-helix-coiled-coil-helix domain containing 5 (CHCHD5), mRNA.
6280646	LOC100133662	100133662	PREDICTED: Homo sapiens hypothetical protein LOC100133662 (LOC100133662), mRNA.
7040692	LOC100133390	100133390	PREDICTED: Homo sapiens hypothetical protein LOC100133390, transcript variant 2 (LOC100133390), mRNA.
5310673	AYP1p1	386608	PREDICTED: Homo sapiens AYP1 pseudogene 1 (AYP1p1), misc RNA.
2070170	UBE2L6	9246	Homo sapiens ubiquitin-conjugating enzyme E2L 6 (UBE2L6), transcript variant 1, mRNA.
6650079	C3orf14	57415	Homo sapiens chromosome 3 open reading frame 14 (C3orf14), mRNA.
4760564	SS18L2	51188	Homo sapiens synovial sarcoma translocation gene on chromosome 18-like 2 (SS18L2), mRNA.
3780544	SF3B14	51639	Homo sapiens splicing factor 3B, 14 kDa subunit (SF3B14), mRNA.
3440168	CHCHD9	645345	PREDICTED: Homo sapiens coiled-coil-helix-coiled-coil-helix domain containing 9 (CHCHD9), mRNA.
6450523	FKBP3	2287	Homo sapiens FK506 binding protein 3, 25kDa (FKBP3), mRNA.
1030333	CCL2	6347	Homo sapiens chemokine (C-C motif) ligand 2 (CCL2), mRNA.
2650524	RPL34	6164	Homo sapiens ribosomal protein L34 (RPL34), transcript variant 2, mRNA.
1070450	PTGS1	5742	Homo sapiens prostaglandin-endoperoxide synthase 1 (prostaglandin G/H synthase and cyclooxygenase) (PTGS1), transcript variant 2, mRNA.
2100678	DNTTIP1	116092	Homo sapiens deoxynucleotidyltransferase, terminal, interacting protein 1 (DNTTIP1), mRNA.
4150048	FABP5	2171	Homo sapiens fatty acid binding protein 5 (psoriasis-associated) (FABP5), mRNA.
6020468	PPP1R14A	94274	Homo sapiens protein phosphatase 1, regulatory (inhibitor) subunit 14A (PPP1R14A), mRNA.
5340246	CRIP2	1397	Homo sapiens cysteine-rich protein 2 (CRIP2), mRNA.
150441	TIGA1	114915	Homo sapiens TIGA1 (TIGA1), mRNA.
5670315	LSM7	51690	Homo sapiens LSM7 homolog, U6 small nuclear RNA associated (S. cerevisiae) (LSM7), mRNA.
3180609	LOC100008588	100008588	Homo sapiens 18S ribosomal RNA (LOC100008588), non-coding RNA.
2510022	LOC643997	643997	PREDICTED: Homo sapiens similar to peptidylprolyl isomerase A isoform 1 (LOC643997), mRNA.
6130064	MEA1	4201	Homo sapiens male-enhanced antigen 1 (MEA1), mRNA.
4230243	NHP2L1	4809	Homo sapiens NHP2 non-histone chromosome protein 2-like 1 (S. cerevisiae) (NHP2L1), transcript variant 2, mRNA.
2070494	PRC1	9055	Homo sapiens protein regulator of cytokinesis 1 (PRC1), transcript variant 2, mRNA.
2630474	MLLT11	10962	Homo sapiens myeloid/lymphoid or mixed-lineage leukemia (trithorax homolog, Drosophila); translocated to, 11 (MLLT11), mRNA.
4780398	NXT1	29107	Homo sapiens NTF2-like export factor 1 (NXT1), mRNA.
1240685	PDCD5	9141	Homo sapiens programmed cell death 5 (PDCD5), mRNA.
3400551	DYNLL2	140735	Homo sapiens dynein, light chain, LC8-type 2 (DYNLL2), mRNA.
2650598	CYP4V2	285440	Homo sapiens cytochrome P450, family 4, subfamily V, polypeptide 2 (CYP4V2), mRNA.
160204	RPP40	10799	Homo sapiens ribonuclease P/MRP 40kDa subunit (RPP40), mRNA.
7040176	C20orf24	55969	Homo sapiens chromosome 20 open reading frame 24 (C20orf24), transcript variant 1, mRNA.
6980156	CIAO1	9391	Homo sapiens cytosolic iron-sulfur protein assembly 1 homolog (S. cerevisiae) (CIAO1), mRNA.
3840446	TIMM23	10431	Homo sapiens translocase of inner mitochondrial membrane 23 homolog (yeast) (TIMM23), nuclear gene encoding mitochondrial protein, mRNA.
520577	TIMM23	10431	Homo sapiens translocase of inner mitochondrial membrane 23 homolog (yeast) (TIMM23), nuclear gene encoding mitochondrial protein, mRNA.
5050608	TIMM23	10431	Homo sapiens translocase of inner mitochondrial membrane 23 homolog (yeast) (TIMM23), nuclear gene encoding mitochondrial protein, mRNA.
1820037	SLC11A2	4891	Homo sapiens solute carrier family 11 (proton-coupled divalent metal ion transporters), member 2 (SLC11A2), mRNA.
1980059	RASSF2	9770	Homo sapiens Ras association (RalGDS/AF-6) domain family member 2 (RASSF2), transcript variant 2, mRNA.
3520168			AGENCOURT_10229596 NIH_MGC_141 Homo sapiens cDNA clone IMAGE:6563923 5, mRNA sequence
6020541	LOC729646	729646	PREDICTED: Homo sapiens misc_RNA (LOC729646), miscRNA.
6370538	WBSCR22	114049	Homo sapiens Williams Beuren syndrome chromosome region 22 (WBSCR22), mRNA.
6450273	C1orf41	51668	Homo sapiens chromosome 1 open reading frame 41 (C1orf41), mRNA.
6960735	UQCRH	7388	Homo sapiens ubiquinol-cytochrome c reductase hinge protein (UQCRH), mRNA.
4150475	CNPY2	10330	Homo sapiens canopy 2 homolog (zebrafish) (CNPY2), mRNA.
4920162	FLYWCH2	114984	Homo sapiens FLYWCH family member 2 (FLYWCH2), mRNA.
5870678	LOC441763	441763	PREDICTED: Homo sapiens hypothetical LOC441763 (LOC441763), mRNA.
70441	NDUFS7	374291	Homo sapiens NADH dehydrogenase (ubiquinone) Fe-S protein 7, 20kDa (NADH-coenzyme Q reductase) (NDUFS7), mRNA.
4120341	ITGAE	3682	Homo sapiens integrin, alpha E (antigen CD103, human mucosal lymphocyte antigen 1; alpha polypeptide) (ITGAE), mRNA.
2060288	PLP2	5355	Homo sapiens proteolipid protein 2 (colonic epithelium-enriched) (PLP2), mRNA.
1230600	LOC651064	651064	PREDICTED: Homo sapiens hypothetical protein LOC651064 (LOC651064), mRNA.
990382	C1orf53	388722	Homo sapiens chromosome 1 open reading frame 53 (C1orf53), mRNA.
780753	SUPT16H	11198	Homo sapiens suppressor of Ty 16 homolog (S. cerevisiae) (SUPT16H), mRNA.
2030577	TIMP3	7078	Homo sapiens TIMP metallopeptidase inhibitor 3 (TIMP3), mRNA.
450546	LOC100132863	100132863	PREDICTED: Homo sapiens misc_RNA (LOC100132863), miscRNA.
5720398	NDUFAF2	91942	Homo sapiens NADH dehydrogenase (ubiquinone) 1 alpha subcomplex, assembly factor 2 (NDUFAF2), mRNA.
6270288	SNRPB2	6629	Homo sapiens small nuclear ribonucleoprotein polypeptide B'' (SNRPB2), transcript variant 1, mRNA.
2690608	RPS7	6201	Homo sapiens ribosomal protein S7 (RPS7), mRNA.
3440064	LOC729406	729406	PREDICTED: Homo sapiens misc_RNA (LOC729406), miscRNA.
1510564	TMEM4	10330	Homo sapiens transmembrane protein 4 (TMEM4), mRNA.
2230626	MRPL33	9553	Homo sapiens mitochondrial ribosomal protein L33 (MRPL33), nuclear gene encoding mitochondrial protein, transcript variant 1, mRNA.
5340279	LOC100133565	100133565	PREDICTED: Homo sapiens similar to hCG23738 (LOC100133565), mRNA.
1770747	TMEM160	54958	Homo sapiens transmembrane protein 160 (TMEM160), mRNA.
5360307	LOC644937	644937	PREDICTED: Homo sapiens similar to ribosomal protein L10 (LOC644937), mRNA.
4040343	LOC100129673	100129673	PREDICTED: Homo sapiens similar to hCG2042915 (LOC100129673), mRNA.
4640168	PIN1	5300	Homo sapiens peptidylprolyl cis/trans isomerase, NIMA-interacting 1 (PIN1), mRNA.
2340092	TCEB1	6921	Homo sapiens transcription elongation factor B (SIII), polypeptide 1 (15kDa, elongin C) (TCEB1), mRNA.
3310520	MOXD1	26002	Homo sapiens monooxygenase, DBH-like 1 (MOXD1), transcript variant 2, mRNA.
2600324	TMEM147	10430	Homo sapiens transmembrane protein 147 (TMEM147), mRNA.
3870630	ATP6V1F	9296	Homo sapiens ATPase, H+ transporting, lysosomal 14kDa, V1 subunit F (ATP6V1F), mRNA.
5720300	G3BP1	10146	Homo sapiens GTPase activating protein (SH3 domain) binding protein 1 (G3BP1), transcript variant 1, mRNA.
4150600	EIF1AY	9086	Homo sapiens eukaryotic translation initiation factor 1A, Y-linked (EIF1AY), mRNA.
620615	NDUFA7	4701	Homo sapiens NADH dehydrogenase (ubiquinone) 1 alpha subcomplex, 7, 14.5kDa (NDUFA7), mRNA.
7000161	OIP5	11339	Homo sapiens Opa interacting protein 5 (OIP5), mRNA.
10546	RPS24	6229	Homo sapiens ribosomal protein S24 (RPS24), transcript variant 2, mRNA.
5820324	PXMP2	5827	Homo sapiens peroxisomal membrane protein 2, 22kDa (PXMP2), mRNA.
3850431	RER1	11079	Homo sapiens RER1 retention in endoplasmic reticulum 1 homolog (S. cerevisiae) (RER1), mRNA.
1230044	SSBP1	6742	Homo sapiens single-stranded DNA binding protein 1 (SSBP1), mRNA.
6100482	ATP2B4	493	Homo sapiens ATPase, Ca++ transporting, plasma membrane 4 (ATP2B4), transcript variant 1, mRNA.
6200332	VPS24	51652	Homo sapiens vacuolar protein sorting 24 homolog (S. cerevisiae) (VPS24), transcript variant 2, mRNA.
2140634	VPS24	51652	Homo sapiens vacuolar protein sorting 24 homolog (S. cerevisiae) (VPS24), transcript variant 2, mRNA.
6840746	LOC728823	728823	PREDICTED: Homo sapiens misc_RNA (LOC728823), miscRNA.
1510131	ERH	2079	Homo sapiens enhancer of rudimentary homolog (Drosophila) (ERH), mRNA.
5570048	ERLIN2	11160	Homo sapiens ER lipid raft associated 2 (ERLIN2), transcript variant 1, mRNA.
10170	GNG5	2787	Homo sapiens guanine nucleotide binding protein (G protein), gamma 5 (GNG5), mRNA.
360475	PLAUR	5329	Homo sapiens plasminogen activator, urokinase receptor (PLAUR), transcript variant 2, mRNA.
1770400	COMMD8	54951	Homo sapiens COMM domain containing 8 (COMMD8), mRNA.
670278	NES	10763	Homo sapiens nestin (NES), mRNA.
520324	REEP5	7905	Homo sapiens receptor accessory protein 5 (REEP5), mRNA.
5390603	UPF2	26019	Homo sapiens UPF2 regulator of nonsense transcripts homolog (yeast) (UPF2), transcript variant 2, mRNA.
6590053	ARD1A	8260	Homo sapiens ARD1 homolog A, N-acetyltransferase (S. cerevisiae) (ARD1A), mRNA.
540601	BRI3P1	730010	PREDICTED: Homo sapiens misc_RNA (BRI3P1), miscRNA.
1470561	FAM173A	65990	Homo sapiens family with sequence similarity 173, member A (FAM173A), mRNA.
3940392	KIAA0367	23273	Homo sapiens KIAA0367 (KIAA0367), mRNA.
5130670	MED31	51003	Homo sapiens mediator complex subunit 31 (MED31), mRNA.
5550768			Homo sapiens cDNA FLJ12874 fis, clone NT2RP2003769
5080164	GEMIN6	79833	Homo sapiens gem (nuclear organelle) associated protein 6 (GEMIN6), mRNA.
2140242	TNFAIP6	7130	Homo sapiens tumor necrosis factor, alpha-induced protein 6 (TNFAIP6), mRNA.
6590377	RPS26	6231	Homo sapiens ribosomal protein S26 (RPS26), mRNA.
5810630	PIGP	51227	Homo sapiens phosphatidylinositol glycan anchor biosynthesis, class P (PIGP), transcript variant 2, mRNA.
6860162	LOC441019	441019	PREDICTED: Homo sapiens hypothetical LOC441019 (LOC441019), mRNA.
6270307	LOC644934	644934	PREDICTED: Homo sapiens similar to 40S ribosomal protein S26, transcript variant 1 (LOC644934), mRNA.

## Sheet: DAVID GOs moR unique down
gene list: 239 moR unique genes down
Functional Annotation Clustering
Current Background: Homo sapiens
196/239 genes recognized by DAVID
Statistical test: a modified Fisher Exact P-Value (EASE score)
39 Cluster(s)
Annotation Cluster 1	Enrichment Score: 5.24		Count	P_Value	Benjamini
	GOTERM_CC_FAT	ribonucleoprotein complex	26	4.0E-11	9.3E-9
	GOTERM_MF_FAT	structural constituent of ribosome	15	5.5E-10	1.8E-7
	GOTERM_CC_FAT	ribosome	15	3.1E-8	3.6E-6
	GOTERM_BP_FAT	translational elongation	11	4.7E-8	4.1E-5
	GOTERM_CC_FAT	ribosomal subunit	12	5.9E-8	4.6E-6
	GOTERM_CC_FAT	cytosolic ribosome	10	1.1E-7	6.3E-6
	GOTERM_BP_FAT	translation	17	1.2E-7	5.4E-5
	GOTERM_CC_FAT	cytosolic part	10	2.1E-5	6.3E-4
	GOTERM_MF_FAT	RNA binding	20	3.9E-5	6.4E-3
	GOTERM_CC_FAT	large ribosomal subunit	7	5.4E-5	1.4E-3
	GOTERM_CC_FAT	cytosolic large ribosomal subunit	5	5.4E-4	7.9E-3
	GOTERM_CC_FAT	cytosolic small ribosomal subunit	5	6.6E-4	8.6E-3
	GOTERM_MF_FAT	structural molecule activity	16	8.7E-4	7.0E-2
	GOTERM_CC_FAT	small ribosomal subunit	5	3.6E-3	3.5E-2
	GOTERM_CC_FAT	non-membrane-bounded organelle	36	3.3E-2	2.1E-1
	GOTERM_CC_FAT	intracellular non-membrane-bounded organelle	36	3.3E-2	2.1E-1
Annotation Cluster 2	Enrichment Score: 3.15		Count	P_Value	Benjamini
	GOTERM_BP_FAT	RNA splicing, via transesterification reactions	9	1.2E-4	3.4E-2
	GOTERM_BP_FAT	RNA splicing, via transesterification reactions with bulged adenosine as nucleophile	9	1.2E-4	3.4E-2
	GOTERM_BP_FAT	nuclear mRNA splicing, via spliceosome	9	1.2E-4	3.4E-2
	GOTERM_BP_FAT	RNA processing	15	8.4E-4	1.1E-1
	GOTERM_BP_FAT	RNA splicing	10	1.8E-3	1.8E-1
	GOTERM_CC_FAT	spliceosome	7	2.1E-3	2.2E-2
	GOTERM_BP_FAT	mRNA metabolic process	11	3.2E-3	2.1E-1
	GOTERM_BP_FAT	mRNA processing	10	4.0E-3	2.1E-1
Annotation Cluster 3	Enrichment Score: 2.92		Count	P_Value	Benjamini
	GOTERM_CC_FAT	membrane-enclosed lumen	36	1.1E-4	2.6E-3
	GOTERM_CC_FAT	intracellular organelle lumen	33	5.6E-4	7.7E-3
	GOTERM_CC_FAT	organelle lumen	33	8.4E-4	1.0E-2
	GOTERM_CC_FAT	nucleoplasm	19	3.0E-3	3.0E-2
	GOTERM_CC_FAT	nuclear lumen	24	1.7E-2	1.2E-1
Annotation Cluster 4	Enrichment Score: 2.69		Count	P_Value	Benjamini
	GOTERM_CC_FAT	mitochondrion	30	7.8E-7	3.7E-5
	GOTERM_CC_FAT	mitochondrial membrane part	10	4.4E-6	1.7E-4
	GOTERM_CC_FAT	mitochondrial part	20	7.0E-6	2.3E-4
	GOTERM_CC_FAT	mitochondrial membrane	14	1.6E-4	3.4E-3
	GOTERM_CC_FAT	mitochondrial inner membrane	12	2.5E-4	4.9E-3
	GOTERM_CC_FAT	mitochondrial envelope	14	2.9E-4	4.8E-3
	GOTERM_BP_FAT	oxidative phosphorylation	7	3.7E-4	7.8E-2
	GOTERM_CC_FAT	organelle inner membrane	12	4.6E-4	7.2E-3
	GOTERM_MF_FAT	NADH dehydrogenase (quinone) activity	5	6.9E-4	7.3E-2
	GOTERM_MF_FAT	NADH dehydrogenase (ubiquinone) activity	5	6.9E-4	7.3E-2
	GOTERM_MF_FAT	NADH dehydrogenase activity	5	6.9E-4	7.3E-2
	GOTERM_BP_FAT	electron transport chain	7	8.3E-4	1.4E-1
	GOTERM_MF_FAT	oxidoreductase activity, acting on NADH or NADPH, quinone or similar compound as acceptor	5	1.1E-3	7.2E-2
	GOTERM_CC_FAT	organelle envelope	16	1.3E-3	1.6E-2
	GOTERM_CC_FAT	envelope	16	1.4E-3	1.5E-2
	GOTERM_BP_FAT	mitochondrial ATP synthesis coupled electron transport	5	2.1E-3	1.7E-1
	GOTERM_BP_FAT	ATP synthesis coupled electron transport	5	2.1E-3	1.7E-1
	GOTERM_BP_FAT	respiratory electron transport chain	5	3.4E-3	1.9E-1
	GOTERM_CC_FAT	mitochondrial respiratory chain	5	3.8E-3	3.5E-2
	GOTERM_CC_FAT	organelle membrane	21	6.2E-3	5.0E-2
	GOTERM_CC_FAT	respiratory chain	5	6.7E-3	5.3E-2
	GOTERM_MF_FAT	oxidoreductase activity, acting on NADH or NADPH	5	7.7E-3	3.1E-1
	GOTERM_BP_FAT	mitochondrial electron transport, NADH to ubiquinone	4	7.7E-3	2.9E-1
	GOTERM_CC_FAT	respiratory chain complex I	4	8.5E-3	6.4E-2
	GOTERM_CC_FAT	mitochondrial respiratory chain complex I	4	8.5E-3	6.4E-2
	GOTERM_CC_FAT	NADH dehydrogenase complex	4	8.5E-3	6.4E-2
	GOTERM_BP_FAT	oxidation reduction	14	9.0E-3	2.9E-1
	GOTERM_BP_FAT	generation of precursor metabolites and energy	9	1.1E-2	3.3E-1
	GOTERM_BP_FAT	cellular respiration	5	1.5E-2	4.0E-1
	GOTERM_BP_FAT	energy derivation by oxidation of organic compounds	5	5.1E-2	6.4E-1
	GOTERM_BP_FAT	phosphorylation	10	3.7E-1	9.5E-1
	GOTERM_BP_FAT	phosphorus metabolic process	11	4.7E-1	9.7E-1
	GOTERM_BP_FAT	phosphate metabolic process	11	4.7E-1	9.7E-1
Annotation Cluster 5	Enrichment Score: 1.49		Count	P_Value	Benjamini
	GOTERM_BP_FAT	oxidative phosphorylation	7	3.7E-4	7.8E-2
	GOTERM_MF_FAT	inorganic cation transmembrane transporter activity	5	5.4E-2	8.1E-1
	GOTERM_MF_FAT	hydrogen ion transmembrane transporter activity	3	2.1E-1	9.5E-1
	GOTERM_MF_FAT	monovalent inorganic cation transmembrane transporter activity	3	2.6E-1	9.8E-1
Annotation Cluster 6	Enrichment Score: 1.39		Count	P_Value	Benjamini
	GOTERM_BP_FAT	ribonucleoprotein complex biogenesis	8	1.8E-3	1.6E-1
	GOTERM_BP_FAT	ribosome biogenesis	5	3.1E-2	5.2E-1
	GOTERM_BP_FAT	rRNA processing	4	6.0E-2	6.7E-1
	GOTERM_BP_FAT	rRNA metabolic process	4	6.6E-2	7.0E-1
	GOTERM_BP_FAT	ncRNA processing	5	1.1E-1	7.8E-1
	GOTERM_BP_FAT	ncRNA metabolic process	5	1.8E-1	8.8E-1
Annotation Cluster 7	Enrichment Score: 1.36		Count	P_Value	Benjamini
	GOTERM_BP_FAT	heme metabolic process	3	1.9E-2	4.4E-1
	GOTERM_BP_FAT	porphyrin metabolic process	3	3.2E-2	5.1E-1
	GOTERM_BP_FAT	tetrapyrrole metabolic process	3	3.2E-2	5.1E-1
	GOTERM_BP_FAT	pigment metabolic process	3	7.0E-2	6.9E-1
	GOTERM_BP_FAT	cofactor metabolic process	5	1.2E-1	7.9E-1
Annotation Cluster 8	Enrichment Score: 1.33		Count	P_Value	Benjamini
	GOTERM_CC_FAT	mitochondrial lumen	7	2.7E-2	1.8E-1
	GOTERM_CC_FAT	mitochondrial matrix	7	2.7E-2	1.8E-1
	GOTERM_CC_FAT	organellar ribosome	3	8.3E-2	4.1E-1
	GOTERM_CC_FAT	mitochondrial ribosome	3	8.3E-2	4.1E-1
Annotation Cluster 9	Enrichment Score: 1.32		Count	P_Value	Benjamini
	GOTERM_CC_FAT	Cajal body	4	3.9E-3	3.5E-2
	GOTERM_CC_FAT	nuclear body	5	8.8E-2	4.3E-1
	GOTERM_CC_FAT	nucleoplasm part	8	3.2E-1	8.6E-1
Annotation Cluster 10	Enrichment Score: 1.21		Count	P_Value	Benjamini
	GOTERM_BP_FAT	mitochondrion organization	7	2.2E-3	1.6E-1
	GOTERM_BP_FAT	protein targeting to mitochondrion	4	4.3E-3	2.1E-1
	GOTERM_BP_FAT	protein localization in mitochondrion	4	4.3E-3	2.1E-1
	GOTERM_CC_FAT	mitochondrial inner membrane presequence translocase complex	3	6.1E-3	5.2E-2
	GOTERM_BP_FAT	mitochondrial transport	4	2.9E-2	5.4E-1
	GOTERM_BP_FAT	protein targeting	6	5.8E-2	6.7E-1
	GOTERM_BP_FAT	protein import	4	1.3E-1	8.2E-1
	GOTERM_BP_FAT	protein localization	13	1.5E-1	8.3E-1
	GOTERM_BP_FAT	protein localization in organelle	4	1.7E-1	8.6E-1
	GOTERM_BP_FAT	protein transport	11	2.0E-1	8.9E-1
	GOTERM_BP_FAT	establishment of protein localization	11	2.1E-1	8.9E-1
	GOTERM_BP_FAT	intracellular protein transport	6	3.0E-1	9.3E-1
	GOTERM_BP_FAT	intracellular transport	9	3.0E-1	9.3E-1
	GOTERM_BP_FAT	cellular protein localization	6	3.7E-1	9.5E-1
	GOTERM_BP_FAT	cellular macromolecule localization	6	3.7E-1	9.5E-1
Annotation Cluster 11	Enrichment Score: 1.16		Count	P_Value	Benjamini
	GOTERM_BP_FAT	positive regulation of ubiquitin-protein ligase activity	5	4.7E-3	2.1E-1
	GOTERM_BP_FAT	positive regulation of ligase activity	5	5.5E-3	2.3E-1
	GOTERM_BP_FAT	regulation of ubiquitin-protein ligase activity	5	6.9E-3	2.7E-1
	GOTERM_BP_FAT	regulation of ligase activity	5	7.9E-3	2.8E-1
	GOTERM_BP_FAT	positive regulation of protein ubiquitination	5	8.9E-3	3.0E-1
	GOTERM_BP_FAT	regulation of protein ubiquitination	5	1.6E-2	4.2E-1
	GOTERM_BP_FAT	proteasomal protein catabolic process	5	1.7E-2	4.3E-1
	GOTERM_BP_FAT	proteasomal ubiquitin-dependent protein catabolic process	5	1.7E-2	4.3E-1
	GOTERM_BP_FAT	cell cycle	15	1.8E-2	4.3E-1
	GOTERM_BP_FAT	anaphase-promoting complex-dependent proteasomal ubiquitin-dependent protein catabolic process	4	2.5E-2	5.2E-1
	GOTERM_BP_FAT	negative regulation of ubiquitin-protein ligase activity during mitotic cell cycle	4	2.5E-2	5.2E-1
	GOTERM_BP_FAT	negative regulation of ubiquitin-protein ligase activity	4	2.7E-2	5.4E-1
	GOTERM_BP_FAT	negative regulation of ligase activity	4	2.7E-2	5.4E-1
	GOTERM_BP_FAT	positive regulation of ubiquitin-protein ligase activity during mitotic cell cycle	4	2.8E-2	5.4E-1
	GOTERM_BP_FAT	ubiquitin-dependent protein catabolic process	7	3.0E-2	5.3E-1
	GOTERM_BP_FAT	negative regulation of cellular protein metabolic process	6	3.1E-2	5.3E-1
	GOTERM_BP_FAT	regulation of ubiquitin-protein ligase activity during mitotic cell cycle	4	3.1E-2	5.2E-1
	GOTERM_BP_FAT	negative regulation of protein ubiquitination	4	3.5E-2	5.4E-1
	GOTERM_BP_FAT	negative regulation of protein metabolic process	6	3.5E-2	5.3E-1
	GOTERM_BP_FAT	cell division	7	6.7E-2	7.0E-1
	GOTERM_BP_FAT	regulation of cellular protein metabolic process	9	8.9E-2	7.5E-1
	GOTERM_BP_FAT	positive regulation of protein modification process	5	1.1E-1	7.8E-1
	GOTERM_BP_FAT	negative regulation of protein modification process	4	1.1E-1	7.8E-1
	GOTERM_BP_FAT	positive regulation of molecular function	10	1.2E-1	7.9E-1
	GOTERM_BP_FAT	positive regulation of catalytic activity	9	1.3E-1	8.2E-1
	GOTERM_BP_FAT	cellular macromolecule catabolic process	11	1.6E-1	8.6E-1
	GOTERM_BP_FAT	positive regulation of cellular protein metabolic process	5	1.9E-1	8.8E-1
	GOTERM_BP_FAT	modification-dependent protein catabolic process	9	1.9E-1	8.8E-1
	GOTERM_BP_FAT	modification-dependent macromolecule catabolic process	9	1.9E-1	8.8E-1
	GOTERM_BP_FAT	positive regulation of protein metabolic process	5	2.1E-1	8.9E-1
	GOTERM_BP_FAT	negative regulation of molecular function	6	2.2E-1	8.9E-1
	GOTERM_BP_FAT	macromolecule catabolic process	11	2.2E-1	8.9E-1
	GOTERM_BP_FAT	proteolysis involved in cellular protein catabolic process	9	2.3E-1	8.9E-1
	GOTERM_BP_FAT	cellular protein catabolic process	9	2.3E-1	8.9E-1
	GOTERM_BP_FAT	protein catabolic process	9	2.6E-1	9.1E-1
	GOTERM_BP_FAT	negative regulation of macromolecule metabolic process	10	2.8E-1	9.2E-1
	GOTERM_BP_FAT	mitotic cell cycle	6	2.9E-1	9.2E-1
	GOTERM_BP_FAT	cell cycle process	8	3.1E-1	9.3E-1
	GOTERM_BP_FAT	regulation of protein modification process	5	3.2E-1	9.3E-1
	GOTERM_BP_FAT	negative regulation of catalytic activity	4	5.0E-1	9.8E-1
	GOTERM_BP_FAT	proteolysis	10	7.0E-1	1.0E0
	GOTERM_BP_FAT	positive regulation of macromolecule metabolic process	7	8.4E-1	1.0E0
Annotation Cluster 12	Enrichment Score: 1.07		Count	P_Value	Benjamini
	GOTERM_MF_FAT	peptidyl-prolyl cis-trans isomerase activity	3	4.7E-2	8.3E-1
	GOTERM_MF_FAT	cis-trans isomerase activity	3	5.2E-2	8.3E-1
	GOTERM_BP_FAT	protein folding	4	2.5E-1	9.1E-1
Annotation Cluster 13	Enrichment Score: 1.06		Count	P_Value	Benjamini
	GOTERM_BP_FAT	RNA transport	4	6.8E-2	7.0E-1
	GOTERM_BP_FAT	establishment of RNA localization	4	6.8E-2	7.0E-1
	GOTERM_BP_FAT	nucleic acid transport	4	6.8E-2	7.0E-1
	GOTERM_BP_FAT	RNA localization	4	7.3E-2	6.9E-1
	GOTERM_BP_FAT	nucleobase, nucleoside, nucleotide and nucleic acid transport	4	9.7E-2	7.7E-1
	GOTERM_BP_FAT	mRNA transport	3	2.1E-1	8.9E-1
Annotation Cluster 14	Enrichment Score: 0.99		Count	P_Value	Benjamini
	GOTERM_MF_FAT	primary active transmembrane transporter activity	6	5.8E-3	2.8E-1
	GOTERM_MF_FAT	P-P-bond-hydrolysis-driven transmembrane transporter activity	6	5.8E-3	2.8E-1
	GOTERM_BP_FAT	purine nucleoside triphosphate metabolic process	5	3.1E-2	5.2E-1
	GOTERM_BP_FAT	nucleoside triphosphate metabolic process	5	3.8E-2	5.5E-1
	GOTERM_MF_FAT	cation-transporting ATPase activity	3	4.5E-2	8.5E-1
	GOTERM_MF_FAT	inorganic cation transmembrane transporter activity	5	5.4E-2	8.1E-1
	GOTERM_BP_FAT	purine ribonucleoside triphosphate biosynthetic process	4	7.0E-2	7.0E-1
	GOTERM_BP_FAT	purine nucleoside triphosphate biosynthetic process	4	7.1E-2	6.9E-1
	GOTERM_BP_FAT	ribonucleoside triphosphate biosynthetic process	4	7.1E-2	6.9E-1
	GOTERM_BP_FAT	nucleoside triphosphate biosynthetic process	4	7.6E-2	7.0E-1
	GOTERM_BP_FAT	ion transmembrane transport	3	8.2E-2	7.2E-1
	GOTERM_MF_FAT	ATPase activity, coupled to transmembrane movement of substances	4	8.3E-2	9.1E-1
	GOTERM_MF_FAT	ATPase activity, coupled to movement of substances	4	8.5E-2	9.0E-1
	GOTERM_MF_FAT	hydrolase activity, acting on acid anhydrides, catalyzing transmembrane movement of substances	4	8.7E-2	8.8E-1
	GOTERM_BP_FAT	nitrogen compound biosynthetic process	7	9.6E-2	7.7E-1
	GOTERM_BP_FAT	purine ribonucleoside triphosphate metabolic process	4	1.0E-1	7.9E-1
	GOTERM_BP_FAT	purine ribonucleotide biosynthetic process	4	1.0E-1	7.9E-1
	GOTERM_BP_FAT	purine nucleotide metabolic process	5	1.1E-1	7.9E-1
	GOTERM_BP_FAT	ribonucleoside triphosphate metabolic process	4	1.1E-1	7.8E-1
	GOTERM_MF_FAT	ATPase activity, coupled	6	1.1E-1	9.3E-1
	GOTERM_BP_FAT	ribonucleotide biosynthetic process	4	1.2E-1	7.9E-1
	GOTERM_BP_FAT	purine ribonucleotide metabolic process	4	1.5E-1	8.3E-1
	GOTERM_MF_FAT	ATPase activity, coupled to transmembrane movement of ions	3	1.5E-1	9.5E-1
	GOTERM_BP_FAT	ribonucleotide metabolic process	4	1.7E-1	8.6E-1
	GOTERM_BP_FAT	purine nucleotide biosynthetic process	4	1.7E-1	8.6E-1
	GOTERM_MF_FAT	ATPase activity	6	2.1E-1	9.6E-1
	GOTERM_BP_FAT	ATP biosynthetic process	3	2.1E-1	8.9E-1
	GOTERM_BP_FAT	nucleotide biosynthetic process	4	2.7E-1	9.2E-1
	GOTERM_BP_FAT	ATP metabolic process	3	2.7E-1	9.2E-1
	GOTERM_BP_FAT	nucleobase, nucleoside and nucleotide biosynthetic process	4	2.9E-1	9.3E-1
	GOTERM_BP_FAT	nucleobase, nucleoside, nucleotide and nucleic acid biosynthetic process	4	2.9E-1	9.3E-1
	GOTERM_BP_FAT	ion transport	7	7.6E-1	1.0E0
	GOTERM_BP_FAT	cation transport	4	9.1E-1	1.0E0
Annotation Cluster 15	Enrichment Score: 0.76		Count	P_Value	Benjamini
	GOTERM_BP_FAT	response to organic nitrogen	5	3.2E-3	1.9E-1
	GOTERM_BP_FAT	response to amine stimulus	3	5.5E-2	6.5E-1
	GOTERM_BP_FAT	response to endogenous stimulus	7	2.0E-1	8.9E-1
	GOTERM_BP_FAT	response to organic substance	10	2.6E-1	9.2E-1
	GOTERM_BP_FAT	response to steroid hormone stimulus	4	2.8E-1	9.3E-1
	GOTERM_BP_FAT	response to nutrient levels	4	3.0E-1	9.3E-1
	GOTERM_BP_FAT	response to extracellular stimulus	4	3.6E-1	9.5E-1
	GOTERM_BP_FAT	response to nutrient	3	3.9E-1	9.6E-1
	GOTERM_BP_FAT	response to hormone stimulus	5	4.8E-1	9.8E-1
	GOTERM_BP_FAT	response to abiotic stimulus	5	4.8E-1	9.8E-1
Annotation Cluster 16	Enrichment Score: 0.71		Count	P_Value	Benjamini
	GOTERM_BP_FAT	protein modification by small protein conjugation or removal	5	7.0E-2	7.0E-1
	GOTERM_BP_FAT	protein modification by small protein conjugation	4	1.4E-1	8.2E-1
	GOTERM_MF_FAT	ubiquitin-protein ligase activity	4	1.6E-1	9.4E-1
	GOTERM_MF_FAT	small conjugating protein ligase activity	4	2.1E-1	9.7E-1
	GOTERM_MF_FAT	acid-amino acid ligase activity	4	2.9E-1	9.9E-1
	GOTERM_BP_FAT	protein ubiquitination	3	3.2E-1	9.3E-1
	GOTERM_MF_FAT	ligase activity, forming carbon-nitrogen bonds	4	3.7E-1	9.9E-1
Annotation Cluster 17	Enrichment Score: 0.6		Count	P_Value	Benjamini
	GOTERM_BP_FAT	spliceosomal snRNP biogenesis	3	3.0E-2	5.4E-1
	GOTERM_BP_FAT	spliceosome assembly	3	3.8E-2	5.5E-1
	GOTERM_BP_FAT	ribonucleoprotein complex assembly	3	1.4E-1	8.3E-1
	GOTERM_BP_FAT	cellular macromolecular complex subunit organization	6	2.6E-1	9.2E-1
	GOTERM_BP_FAT	cellular macromolecular complex assembly	5	3.7E-1	9.5E-1
	GOTERM_BP_FAT	macromolecular complex subunit organization	8	5.4E-1	9.8E-1
	GOTERM_BP_FAT	macromolecular complex assembly	7	6.3E-1	9.9E-1
	GOTERM_BP_FAT	protein complex assembly	4	8.7E-1	1.0E0
	GOTERM_BP_FAT	protein complex biogenesis	4	8.7E-1	1.0E0
Annotation Cluster 18	Enrichment Score: 0.58		Count	P_Value	Benjamini
	GOTERM_BP_FAT	DNA repair	6	1.4E-1	8.3E-1
	GOTERM_BP_FAT	DNA metabolic process	8	2.2E-1	8.9E-1
	GOTERM_BP_FAT	DNA replication	4	2.8E-1	9.3E-1
	GOTERM_BP_FAT	response to DNA damage stimulus	6	2.9E-1	9.3E-1
	GOTERM_BP_FAT	cellular response to stress	7	4.7E-1	9.8E-1
Annotation Cluster 19	Enrichment Score: 0.58		Count	P_Value	Benjamini
	GOTERM_CC_FAT	mitochondrial outer membrane	3	2.3E-1	7.7E-1
	GOTERM_CC_FAT	organelle outer membrane	3	2.8E-1	8.3E-1
	GOTERM_CC_FAT	outer membrane	3	2.9E-1	8.4E-1
Annotation Cluster 20	Enrichment Score: 0.54		Count	P_Value	Benjamini
	GOTERM_BP_FAT	nuclear export	3	1.1E-1	7.9E-1
	GOTERM_BP_FAT	nucleocytoplasmic transport	3	4.5E-1	9.7E-1
	GOTERM_BP_FAT	nuclear transport	3	4.5E-1	9.7E-1
Annotation Cluster 21	Enrichment Score: 0.53		Count	P_Value	Benjamini
	GOTERM_BP_FAT	cell cycle	15	1.8E-2	4.3E-1
	GOTERM_BP_FAT	cell division	7	6.7E-2	7.0E-1
	GOTERM_BP_FAT	spindle organization	3	7.0E-2	6.9E-1
	GOTERM_BP_FAT	mitotic cell cycle	6	2.9E-1	9.2E-1
	GOTERM_BP_FAT	cell cycle process	8	3.1E-1	9.3E-1
	GOTERM_BP_FAT	organelle fission	4	3.8E-1	9.5E-1
	GOTERM_BP_FAT	M phase	5	4.0E-1	9.5E-1
	GOTERM_BP_FAT	cytoskeleton organization	6	4.2E-1	9.6E-1
	GOTERM_BP_FAT	microtubule cytoskeleton organization	3	4.2E-1	9.6E-1
	GOTERM_BP_FAT	microtubule-based process	4	4.4E-1	9.7E-1
	GOTERM_BP_FAT	cell cycle phase	5	5.7E-1	9.9E-1
	GOTERM_BP_FAT	nuclear division	3	6.3E-1	9.9E-1
	GOTERM_BP_FAT	mitosis	3	6.3E-1	9.9E-1
	GOTERM_BP_FAT	M phase of mitotic cell cycle	3	6.4E-1	9.9E-1
	GOTERM_BP_FAT	positive regulation of macromolecule metabolic process	7	8.4E-1	1.0E0
Annotation Cluster 22	Enrichment Score: 0.44		Count	P_Value	Benjamini
	GOTERM_BP_FAT	chemotaxis	4	2.0E-1	8.9E-1
	GOTERM_BP_FAT	taxis	4	2.0E-1	8.9E-1
	GOTERM_BP_FAT	locomotory behavior	4	5.0E-1	9.8E-1
	GOTERM_BP_FAT	behavior	4	8.4E-1	1.0E0
Annotation Cluster 23	Enrichment Score: 0.38		Count	P_Value	Benjamini
	GOTERM_MF_FAT	glycosaminoglycan binding	3	3.8E-1	9.9E-1
	GOTERM_MF_FAT	pattern binding	3	4.3E-1	1.0E0
	GOTERM_MF_FAT	polysaccharide binding	3	4.3E-1	1.0E0
	GOTERM_MF_FAT	carbohydrate binding	5	4.3E-1	1.0E0
Annotation Cluster 24	Enrichment Score: 0.36		Count	P_Value	Benjamini
	GOTERM_MF_FAT	identical protein binding	10	1.5E-1	9.5E-1
	GOTERM_MF_FAT	protein homodimerization activity	4	6.1E-1	1.0E0
	GOTERM_MF_FAT	protein dimerization activity	4	8.9E-1	1.0E0
Annotation Cluster 25	Enrichment Score: 0.33		Count	P_Value	Benjamini
	GOTERM_BP_FAT	histone modification	3	3.3E-1	9.4E-1
	GOTERM_BP_FAT	covalent chromatin modification	3	3.5E-1	9.5E-1
	GOTERM_BP_FAT	chromatin organization	5	5.0E-1	9.8E-1
	GOTERM_BP_FAT	chromosome organization	6	5.1E-1	9.8E-1
	GOTERM_BP_FAT	chromatin modification	3	7.5E-1	1.0E0
Annotation Cluster 26	Enrichment Score: 0.25		Count	P_Value	Benjamini
	GOTERM_BP_FAT	cytoskeleton organization	6	4.2E-1	9.6E-1
	GOTERM_BP_FAT	actin cytoskeleton organization	3	6.5E-1	9.9E-1
	GOTERM_BP_FAT	actin filament-based process	3	6.8E-1	1.0E0
Annotation Cluster 27	Enrichment Score: 0.23		Count	P_Value	Benjamini
	GOTERM_BP_FAT	regulation of apoptosis	10	3.8E-1	9.5E-1
	GOTERM_BP_FAT	regulation of programmed cell death	10	3.9E-1	9.5E-1
	GOTERM_BP_FAT	regulation of cell death	10	3.9E-1	9.6E-1
	GOTERM_BP_FAT	cell death	8	5.5E-1	9.9E-1
	GOTERM_BP_FAT	death	8	5.6E-1	9.9E-1
	GOTERM_BP_FAT	anti-apoptosis	3	6.0E-1	9.9E-1
	GOTERM_BP_FAT	negative regulation of apoptosis	4	6.7E-1	1.0E0
	GOTERM_BP_FAT	negative regulation of programmed cell death	4	6.8E-1	1.0E0
	GOTERM_BP_FAT	negative regulation of cell death	4	6.8E-1	1.0E0
	GOTERM_BP_FAT	positive regulation of apoptosis	4	7.9E-1	1.0E0
	GOTERM_BP_FAT	positive regulation of programmed cell death	4	7.9E-1	1.0E0
	GOTERM_BP_FAT	positive regulation of cell death	4	8.0E-1	1.0E0
Annotation Cluster 28	Enrichment Score: 0.23		Count	P_Value	Benjamini
	GOTERM_CC_FAT	microsome	4	4.2E-1	9.3E-1
	GOTERM_CC_FAT	vesicular fraction	4	4.4E-1	9.4E-1
	GOTERM_CC_FAT	insoluble fraction	9	6.1E-1	9.8E-1
	GOTERM_CC_FAT	membrane fraction	8	7.1E-1	9.9E-1
	GOTERM_CC_FAT	cell fraction	9	8.6E-1	1.0E0
Annotation Cluster 29	Enrichment Score: 0.19		Count	P_Value	Benjamini
	GOTERM_BP_FAT	regulation of cell cycle	6	2.2E-1	8.9E-1
	GOTERM_BP_FAT	regulation of phosphorylation	5	6.7E-1	1.0E0
	GOTERM_BP_FAT	regulation of phosphate metabolic process	5	7.0E-1	1.0E0
	GOTERM_BP_FAT	regulation of phosphorus metabolic process	5	7.0E-1	1.0E0
	GOTERM_BP_FAT	regulation of protein kinase activity	3	8.5E-1	1.0E0
	GOTERM_BP_FAT	regulation of kinase activity	3	8.6E-1	1.0E0
	GOTERM_BP_FAT	regulation of transferase activity	3	8.8E-1	1.0E0
Annotation Cluster 30	Enrichment Score: 0.15		Count	P_Value	Benjamini
	GOTERM_MF_FAT	ATPase activity, coupled	6	1.1E-1	9.3E-1
	GOTERM_MF_FAT	ATPase activity	6	2.1E-1	9.6E-1
	GOTERM_MF_FAT	nucleotide binding	16	9.5E-1	1.0E0
	GOTERM_MF_FAT	ATP binding	9	9.7E-1	1.0E0
	GOTERM_MF_FAT	adenyl ribonucleotide binding	9	9.8E-1	1.0E0
	GOTERM_MF_FAT	adenyl nucleotide binding	9	9.9E-1	1.0E0
	GOTERM_MF_FAT	purine nucleoside binding	9	9.9E-1	1.0E0
	GOTERM_MF_FAT	nucleoside binding	9	9.9E-1	1.0E0
	GOTERM_MF_FAT	ribonucleotide binding	10	9.9E-1	1.0E0
	GOTERM_MF_FAT	purine ribonucleotide binding	10	9.9E-1	1.0E0
	GOTERM_MF_FAT	purine nucleotide binding	10	1.0E0	1.0E0
Annotation Cluster 31	Enrichment Score: 0.14		Count	P_Value	Benjamini
	GOTERM_BP_FAT	apoptosis	7	5.3E-1	9.8E-1
	GOTERM_BP_FAT	programmed cell death	7	5.5E-1	9.9E-1
	GOTERM_BP_FAT	positive regulation of apoptosis	4	7.9E-1	1.0E0
	GOTERM_BP_FAT	positive regulation of programmed cell death	4	7.9E-1	1.0E0
	GOTERM_BP_FAT	positive regulation of cell death	4	8.0E-1	1.0E0
	GOTERM_BP_FAT	induction of apoptosis	3	8.2E-1	1.0E0
	GOTERM_BP_FAT	induction of programmed cell death	3	8.2E-1	1.0E0
Annotation Cluster 32	Enrichment Score: 0.09		Count	P_Value	Benjamini
	GOTERM_CC_FAT	microtubule cytoskeleton	6	6.5E-1	9.9E-1
	GOTERM_CC_FAT	cytoskeletal part	8	8.5E-1	1.0E0
	GOTERM_CC_FAT	cytoskeleton	10	9.4E-1	1.0E0
Annotation Cluster 33	Enrichment Score: 0.09		Count	P_Value	Benjamini
	GOTERM_BP_FAT	di-, tri-valent inorganic cation homeostasis	3	6.8E-1	1.0E0
	GOTERM_BP_FAT	homeostatic process	7	7.4E-1	1.0E0
	GOTERM_BP_FAT	cation homeostasis	3	7.7E-1	1.0E0
	GOTERM_BP_FAT	ion homeostasis	3	9.1E-1	1.0E0
	GOTERM_BP_FAT	chemical homeostasis	3	9.6E-1	1.0E0
Annotation Cluster 34	Enrichment Score: 0.09		Count	P_Value	Benjamini
	GOTERM_BP_FAT	negative regulation of macromolecule metabolic process	10	2.8E-1	9.2E-1
	GOTERM_BP_FAT	negative regulation of RNA metabolic process	4	6.9E-1	1.0E0
	GOTERM_BP_FAT	negative regulation of transcription from RNA polymerase II promoter	3	7.3E-1	1.0E0
	GOTERM_BP_FAT	negative regulation of nucleobase, nucleoside, nucleotide and nucleic acid metabolic process	5	7.4E-1	1.0E0
	GOTERM_BP_FAT	negative regulation of nitrogen compound metabolic process	5	7.5E-1	1.0E0
	GOTERM_BP_FAT	negative regulation of transcription	4	8.3E-1	1.0E0
	GOTERM_BP_FAT	regulation of transcription from RNA polymerase II promoter	6	8.4E-1	1.0E0
	GOTERM_BP_FAT	negative regulation of transcription, DNA-dependent	3	8.6E-1	1.0E0
	GOTERM_MF_FAT	transcription factor binding	4	8.7E-1	1.0E0
	GOTERM_BP_FAT	negative regulation of gene expression	4	8.7E-1	1.0E0
	GOTERM_BP_FAT	negative regulation of macromolecule biosynthetic process	4	9.0E-1	1.0E0
	GOTERM_BP_FAT	negative regulation of cellular biosynthetic process	4	9.1E-1	1.0E0
	GOTERM_BP_FAT	negative regulation of biosynthetic process	4	9.2E-1	1.0E0
	GOTERM_MF_FAT	transcription regulator activity	9	9.8E-1	1.0E0
	GOTERM_BP_FAT	regulation of RNA metabolic process	9	1.0E0	1.0E0
	GOTERM_BP_FAT	regulation of transcription	14	1.0E0	1.0E0
	GOTERM_BP_FAT	regulation of transcription, DNA-dependent	8	1.0E0	1.0E0
	GOTERM_BP_FAT	transcription	8	1.0E0	1.0E0
Annotation Cluster 35	Enrichment Score: 0.05		Count	P_Value	Benjamini
	GOTERM_CC_FAT	proteinaceous extracellular matrix	3	8.3E-1	1.0E0
	GOTERM_CC_FAT	extracellular matrix	3	8.6E-1	1.0E0
	GOTERM_CC_FAT	extracellular region part	6	9.7E-1	1.0E0
Annotation Cluster 36	Enrichment Score: 0.01		Count	P_Value	Benjamini
	GOTERM_CC_FAT	extracellular region part	6	9.7E-1	1.0E0
	GOTERM_CC_FAT	extracellular space	4	9.7E-1	1.0E0
	GOTERM_CC_FAT	extracellular region	10	1.0E0	1.0E0
Annotation Cluster 37	Enrichment Score: 0		Count	P_Value	Benjamini
	GOTERM_CC_FAT	integral to plasma membrane	6	9.9E-1	1.0E0
	GOTERM_CC_FAT	intrinsic to plasma membrane	6	1.0E0	1.0E0
	GOTERM_CC_FAT	plasma membrane part	12	1.0E0	1.0E0
Annotation Cluster 38	Enrichment Score: 0		Count	P_Value	Benjamini
	GOTERM_MF_FAT	transition metal ion binding	18	9.9E-1	1.0E0
	GOTERM_MF_FAT	metal ion binding	25	1.0E0	1.0E0
	GOTERM_MF_FAT	zinc ion binding	11	1.0E0	1.0E0
	GOTERM_MF_FAT	cation binding	25	1.0E0	1.0E0
	GOTERM_MF_FAT	ion binding	25	1.0E0	1.0E0
Annotation Cluster 39	Enrichment Score: 0		Count	P_Value	Benjamini
	GOTERM_BP_FAT	sensory perception	3	1.0E0	1.0E0
	GOTERM_BP_FAT	cognition	3	1.0E0	1.0E0
	GOTERM_BP_FAT	neurological system process	3	1.0E0	1.0E0

## Sheet: miR 171 unique genes up
ProbeID	Symbol	Entrez_Gene_ID	Definition
4120243	PSG9	5678	Homo sapiens pregnancy specific beta-1-glycoprotein 9 (PSG9), mRNA.
4250328	CHSY3	337876	Homo sapiens chondroitin sulfate synthase 3 (CHSY3), mRNA.
4010445	SFRS2IP	9169	Homo sapiens splicing factor, arginine/serine-rich 2, interacting protein (SFRS2IP), mRNA.
780010	SFRS2IP	9169	Homo sapiens splicing factor, arginine/serine-rich 2, interacting protein (SFRS2IP), mRNA.
1510072	PITRM1	10531	Homo sapiens pitrilysin metallopeptidase 1 (PITRM1), mRNA.
4590020	YOD1	55432	Homo sapiens YOD1 OTU deubiquinating enzyme 1 homolog (S. cerevisiae) (YOD1), mRNA.
2760309			Homo sapiens mRNA; cDNA DKFZp779O0231 (from clone DKFZp779O0231)
3170446	NUDT21	11051	Homo sapiens nudix (nucleoside diphosphate linked moiety X)-type motif 21 (NUDT21), mRNA.
6520220	CAPRIN1	4076	Homo sapiens cell cycle associated protein 1 (CAPRIN1), transcript variant 1, mRNA.
540082	TBL1XR1	79718	Homo sapiens transducin (beta)-like 1X-linked receptor 1 (TBL1XR1), mRNA.
510762	FAM62B	57488	Homo sapiens family with sequence similarity 62 (C2 domain containing) member B (FAM62B), mRNA.
5960398	NT5E	4907	Homo sapiens 5'-nucleotidase, ecto (CD73) (NT5E), mRNA.
7400546	PPP3CB	5532	Homo sapiens protein phosphatase 3 (formerly 2B), catalytic subunit, beta isoform (PPP3CB), mRNA.
5560739	COL11A1	1301	Homo sapiens collagen, type XI, alpha 1 (COL11A1), transcript variant B, mRNA.
670470	SLK	9748	Homo sapiens STE20-like kinase (yeast) (SLK), mRNA.
4060021	SLK	9748	Homo sapiens STE20-like kinase (yeast) (SLK), mRNA.
1410170	GOPC	57120	Homo sapiens golgi associated PDZ and coiled-coil motif containing (GOPC), transcript variant 1, mRNA.
6400639	MGC18216	145815	PREDICTED: Homo sapiens hypothetical protein MGC18216 (MGC18216), mRNA.
2750598	ANKRD46	157567	Homo sapiens ankyrin repeat domain 46 (ANKRD46), mRNA.
6550603	HMGCR	3156	Homo sapiens 3-hydroxy-3-methylglutaryl-Coenzyme A reductase (HMGCR), mRNA.
2600291	MTAP	4507	Homo sapiens methylthioadenosine phosphorylase (MTAP), mRNA.
3360689	ILF3	3609	Homo sapiens interleukin enhancer binding factor 3, 90kDa (ILF3), transcript variant 2, mRNA.
1580520	PTPN13	5783	Homo sapiens protein tyrosine phosphatase, non-receptor type 13 (APO-1/CD95 (Fas)-associated phosphatase) (PTPN13), transcript variant 3, mRNA.
3060609	PTPN13	5783	Homo sapiens protein tyrosine phosphatase, non-receptor type 13 (APO-1/CD95 (Fas)-associated phosphatase) (PTPN13), transcript variant 3, mRNA.
5720292			Homo sapiens cDNA clone IMAGE:4797120
6290681	TOMM20	9804	Homo sapiens translocase of outer mitochondrial membrane 20 homolog (yeast) (TOMM20), nuclear gene encoding mitochondrial protein, mRNA.
2970364	BMPER	168667	Homo sapiens BMP binding endothelial regulator (BMPER), mRNA.
940722	CTNNAL1	8727	Homo sapiens catenin (cadherin-associated protein), alpha-like 1 (CTNNAL1), mRNA.
2100368	GOLT1B	51026	Homo sapiens golgi transport 1 homolog B (S. cerevisiae) (GOLT1B), mRNA.
6840035	GBP1	2633	Homo sapiens guanylate binding protein 1, interferon-inducible, 67kDa (GBP1), mRNA.
2190148	GBP1	2633	Homo sapiens guanylate binding protein 1, interferon-inducible, 67kDa (GBP1), mRNA.
4290279	ACLY	47	Homo sapiens ATP citrate lyase (ACLY), transcript variant 1, mRNA.
5720598	MYO1B	4430	Homo sapiens myosin IB (MYO1B), mRNA.
6370273	CTPS	1503	Homo sapiens CTP synthase (CTPS), mRNA.
7330563	FAM178A	55719	Homo sapiens family with sequence similarity 178, member A (FAM178A), transcript variant 1, mRNA.
1410358	SH3RF1	57630	Homo sapiens SH3 domain containing ring finger 1 (SH3RF1), mRNA.
3990674	SSFA2	6744	Homo sapiens sperm specific antigen 2 (SSFA2), mRNA.
4880750	SOCS5	9655	Homo sapiens suppressor of cytokine signaling 5 (SOCS5), transcript variant 2, mRNA.
6450669	ANLN	54443	Homo sapiens anillin, actin binding protein (ANLN), mRNA.
5420309	AURKA	6790	Homo sapiens aurora kinase A (AURKA), transcript variant 3, mRNA.
270524	P15RS	55197	Homo sapiens hypothetical protein FLJ10656 (P15RS), mRNA.
4120278	KIF23	9493	Homo sapiens kinesin family member 23 (KIF23), transcript variant 2, mRNA.
4590241	CNOT7	29883	Homo sapiens CCR4-NOT transcription complex, subunit 7 (CNOT7), transcript variant 1, mRNA.
4200504	MET	4233	Homo sapiens met proto-oncogene (hepatocyte growth factor receptor) (MET), transcript variant 2, mRNA.
7040397	PRRC1	133619	Homo sapiens proline-rich coiled-coil 1 (PRRC1), mRNA.
4150240	YTHDF3	253943	Homo sapiens YTH domain family, member 3 (YTHDF3), mRNA.
160019	SORT1	6272	Homo sapiens sortilin 1 (SORT1), mRNA.
1980309	IL8	3576	Homo sapiens interleukin 8 (IL8), mRNA.
2810523	SSR3	6747	Homo sapiens signal sequence receptor, gamma (translocon-associated protein gamma) (SSR3), mRNA.
110328	C14orf32	93487	Homo sapiens chromosome 14 open reading frame 32 (C14orf32), mRNA.
1030674	STT3B	201595	Homo sapiens STT3, subunit of the oligosaccharyltransferase complex, homolog B (S. cerevisiae) (STT3B), mRNA.
2640576	MCFD2	90411	Homo sapiens multiple coagulation factor deficiency 2 (MCFD2), mRNA.
5960274	NCKAP1	10787	Homo sapiens NCK-associated protein 1 (NCKAP1), transcript variant 1, mRNA.
6590349	LOC100129034	100129034	PREDICTED: Homo sapiens hypothetical protein LOC100129034 (LOC100129034), mRNA.
630609	XYLT1	64131	Homo sapiens xylosyltransferase I (XYLT1), mRNA.
1690288	MYO9A	4649	Homo sapiens myosin IXA (MYO9A), mRNA.
3400612	WDFY1	57590	Homo sapiens WD repeat and FYVE domain containing 1 (WDFY1), mRNA.
110307	FILIP1L	11259	Homo sapiens filamin A interacting protein 1-like (FILIP1L), transcript variant 2, mRNA.
6200369	PPP1CB	5500	Homo sapiens protein phosphatase 1, catalytic subunit, beta isoform (PPP1CB), transcript variant 3, mRNA.
6380743	STX12	23673	Homo sapiens syntaxin 12 (STX12), mRNA.
240333	ETS1	2113	Homo sapiens v-ets erythroblastosis virus E26 oncogene homolog 1 (avian) (ETS1), mRNA.
2850059	CRY1	1407	Homo sapiens cryptochrome 1 (photolyase-like) (CRY1), mRNA.
7510681	SLC25A24	29957	Homo sapiens solute carrier family 25 (mitochondrial carrier; phosphate carrier), member 24 (SLC25A24), nuclear gene encoding mitochondrial protein, transcript variant 1, mRNA.
150630	UBE2G1	7326	Homo sapiens ubiquitin-conjugating enzyme E2G 1 (UBC7 homolog, yeast) (UBE2G1), mRNA.
2480241	ATP6V1C1	528	Homo sapiens ATPase, H+ transporting, lysosomal 42kDa, V1 subunit C1 (ATP6V1C1), mRNA.
1430735	NET1	10276	Homo sapiens neuroepithelial cell transforming 1 (NET1), transcript variant 1, mRNA.
5690341			Homo sapiens cDNA clone IMAGE:5297467
5900246			Homo sapiens MSTP131 (MST131) mRNA, complete cds
3360224	MMP1	4312	Homo sapiens matrix metallopeptidase 1 (interstitial collagenase) (MMP1), mRNA.
2320575	TSPAN2	10100	Homo sapiens tetraspanin 2 (TSPAN2), mRNA.
2470600	KATNAL1	84056	Homo sapiens katanin p60 subunit A-like 1 (KATNAL1), transcript variant 2, mRNA.
2350333	TEX2	55852	Homo sapiens testis expressed 2 (TEX2), mRNA.
5560576	NEDD4	4734	Homo sapiens neural precursor cell expressed, developmentally down-regulated 4 (NEDD4), transcript variant 1, mRNA.
1500669	MYO1B	4430	Homo sapiens myosin IB (MYO1B), mRNA.
1710736	DOCK10	55619	Homo sapiens dedicator of cytokinesis 10 (DOCK10), mRNA.
3930553	DDX10	1662	Homo sapiens DEAD (Asp-Glu-Ala-Asp) box polypeptide 10 (DDX10), mRNA.
7320386	TTL	150465	Homo sapiens tubulin tyrosine ligase (TTL), mRNA.
5220767	FLNB	2317	Homo sapiens filamin B, beta (actin binding protein 278) (FLNB), mRNA.
1510553	DACT1	51339	Homo sapiens dapper, antagonist of beta-catenin, homolog 1 (Xenopus laevis) (DACT1), transcript variant 1, mRNA.
6480630	ATP9A	10079	Homo sapiens ATPase, class II, type 9A (ATP9A), mRNA.
6650121	C1orf71	163882	Homo sapiens chromosome 1 open reading frame 71 (C1orf71), mRNA.
5390164	FAT1	2195	Homo sapiens FAT tumor suppressor homolog 1 (Drosophila) (FAT1), mRNA.
5690246	SPIRE1	56907	Homo sapiens spire homolog 1 (Drosophila) (SPIRE1), transcript variant 2, mRNA.
2680047	MAP2K4	6416	Homo sapiens mitogen-activated protein kinase kinase 4 (MAP2K4), mRNA.
3310672	CLIP4	79745	Homo sapiens CAP-GLY domain containing linker protein family, member 4 (CLIP4), mRNA.
7610598	TRAF5	7188	Homo sapiens TNF receptor-associated factor 5 (TRAF5), transcript variant 1, mRNA.
7400368	RUNX1	861	Homo sapiens runt-related transcription factor 1 (acute myeloid leukemia 1; aml1 oncogene) (RUNX1), transcript variant 1, mRNA.
2710017	KIF5B	3799	Homo sapiens kinesin family member 5B (KIF5B), mRNA.
4860468	ARL1	400	Homo sapiens ADP-ribosylation factor-like 1 (ARL1), mRNA.
3710044	PLAT	5327	Homo sapiens plasminogen activator, tissue (PLAT), transcript variant 1, mRNA.
3520241	DACT1	51339	Homo sapiens dapper, antagonist of beta-catenin, homolog 1 (Xenopus laevis) (DACT1), mRNA.
1450524	NUP205	23165	Homo sapiens nucleoporin 205kDa (NUP205), mRNA.
460220	ITGA1	3672	Homo sapiens integrin, alpha 1 (ITGA1), mRNA.
2190326	DIO2	1734	Homo sapiens deiodinase, iodothyronine, type II (DIO2), transcript variant 3, mRNA.
3120379	DPY19L1	23333	Homo sapiens dpy-19-like 1 (C. elegans) (DPY19L1), mRNA.
6330195	EP400	57634	Homo sapiens E1A binding protein p400 (EP400), mRNA.
3460386	B4GALT1	2683	Homo sapiens UDP-Gal:betaGlcNAc beta 1,4- galactosyltransferase, polypeptide 1 (B4GALT1), mRNA.
3390020	MBTPS1	8720	Homo sapiens membrane-bound transcription factor peptidase, site 1 (MBTPS1), mRNA.
5310114	MBTPS1	8720	Homo sapiens membrane-bound transcription factor peptidase, site 1 (MBTPS1), mRNA.
4830575	CCDC80	151887	Homo sapiens coiled-coil domain containing 80 (CCDC80), transcript variant 1, mRNA.
3460121	TOMM20	9804	Homo sapiens translocase of outer mitochondrial membrane 20 homolog (yeast) (TOMM20), nuclear gene encoding mitochondrial protein, mRNA.
2940095	SLC36A1	206358	Homo sapiens solute carrier family 36 (proton/amino acid symporter), member 1 (SLC36A1), mRNA.
360187	RIOK3	8780	Homo sapiens RIO kinase 3 (yeast) (RIOK3), transcript variant 1, mRNA.
2370129	DERL1	79139	Homo sapiens Der1-like domain family, member 1 (DERL1), mRNA.
1170072	ZSWIM4	65249	Homo sapiens zinc finger, SWIM-type containing 4 (ZSWIM4), mRNA.
70088	SGCD	6444	Homo sapiens sarcoglycan, delta (35kDa dystrophin-associated glycoprotein) (SGCD), transcript variant 1, mRNA.
3890523	IL7R	3575	PREDICTED: Homo sapiens interleukin 7 receptor (IL7R), mRNA.
6660709	TTC37	9652	Homo sapiens tetratricopeptide repeat domain 37 (TTC37), mRNA.
3990594	COG3	83548	Homo sapiens component of oligomeric golgi complex 3 (COG3), mRNA.
7650020	AADACL1	57552	Homo sapiens arylacetamide deacetylase-like 1 (AADACL1), mRNA.
4760593	CD59	966	Homo sapiens CD59 molecule, complement regulatory protein (CD59), transcript variant 2, mRNA.
5550452	KCNMA1	3778	Homo sapiens potassium large conductance calcium-activated channel, subfamily M, alpha member 1 (KCNMA1), transcript variant 2, mRNA.
3360066	ANGPT1	284	Homo sapiens angiopoietin 1 (ANGPT1), mRNA.
3120326	ANGPT1	284	Homo sapiens angiopoietin 1 (ANGPT1), mRNA.
1820750	STAT1	6772	Homo sapiens signal transducer and activator of transcription 1, 91kDa (STAT1), transcript variant alpha, mRNA.
1070450	PTGS1	5742	Homo sapiens prostaglandin-endoperoxide synthase 1 (prostaglandin G/H synthase and cyclooxygenase) (PTGS1), transcript variant 2, mRNA.
460711	BAT2D1	23215	Homo sapiens BAT2 domain containing 1 (BAT2D1), mRNA.
2070437	LOC653631	653631	PREDICTED: Homo sapiens hypothetical LOC653631 (LOC653631), mRNA.
160114	SMAP1	60682	Homo sapiens stromal membrane-associated protein 1 (SMAP1), mRNA.
2680722	HIF1A	3091	Homo sapiens hypoxia-inducible factor 1, alpha subunit (basic helix-loop-helix transcription factor) (HIF1A), transcript variant 2, mRNA.
1570114			Homo sapiens mRNA; cDNA DKFZp686J0156 (from clone DKFZp686J0156)
1660113	FNDC3A	22862	Homo sapiens fibronectin type III domain containing 3A (FNDC3A), transcript variant 1, mRNA.
7200358	FNDC3A	22862	Homo sapiens fibronectin type III domain containing 3A (FNDC3A), transcript variant 1, mRNA.
2680497	NCAPD2	9918	Homo sapiens non-SMC condensin I complex, subunit D2 (NCAPD2), mRNA.
2760719	LOC100130919	100130919	PREDICTED: Homo sapiens hypothetical protein LOC100130919 (LOC100130919), mRNA.
2710195	TARS	6897	Homo sapiens threonyl-tRNA synthetase (TARS), mRNA.
70504	GREM1	26585	Homo sapiens gremlin 1, cysteine knot superfamily, homolog (Xenopus laevis) (GREM1), mRNA.
460338	PLOD2	5352	Homo sapiens procollagen-lysine, 2-oxoglutarate 5-dioxygenase 2 (PLOD2), transcript variant 1, mRNA.
2360671	ANKLE2	23141	Homo sapiens ankyrin repeat and LEM domain containing 2 (ANKLE2), mRNA.
6020255	EGR2	1959	Homo sapiens early growth response 2 (Krox-20 homolog, Drosophila) (EGR2), mRNA.
6900725	DHX9	1660	Homo sapiens DEAH (Asp-Glu-Ala-His) box polypeptide 9 (DHX9), mRNA.
2630563	SLC39A14	23516	Homo sapiens solute carrier family 39 (zinc transporter), member 14 (SLC39A14), mRNA.
5960465	BUB3	9184	Homo sapiens BUB3 budding uninhibited by benzimidazoles 3 homolog (yeast) (BUB3), transcript variant 1, mRNA.
1470551	SEL1L3	23231	Homo sapiens sel-1 suppressor of lin-12-like 3 (C. elegans) (SEL1L3), mRNA.
3710386	2013-09-10	151011	Homo sapiens septin 10 (SEPT10), transcript variant 1, mRNA.
650458	FILIP1L	11259	Homo sapiens filamin A interacting protein 1-like (FILIP1L), transcript variant 1, mRNA.
3120402	SLC30A7	148867	Homo sapiens solute carrier family 30 (zinc transporter), member 7 (SLC30A7), mRNA.
2600747	IFIT2	3433	Homo sapiens interferon-induced protein with tetratricopeptide repeats 2 (IFIT2), mRNA.
5900152	NOX4	50507	Homo sapiens NADPH oxidase 4 (NOX4), mRNA.
6560148	TCEB3	6924	Homo sapiens transcription elongation factor B (SIII), polypeptide 3 (110kDa, elongin A) (TCEB3), mRNA.
6550170	KLHL9	55958	Homo sapiens kelch-like 9 (Drosophila) (KLHL9), mRNA.
3840131	NUP153	9972	Homo sapiens nucleoporin 153kDa (NUP153), mRNA.
7550324	SHROOM2	357	Homo sapiens shroom family member 2 (SHROOM2), mRNA.
670025	CORO1C	23603	Homo sapiens coronin, actin binding protein, 1C (CORO1C), transcript variant 1, mRNA.
3290079	HEATR5B	54497	Homo sapiens HEAT repeat containing 5B (HEATR5B), mRNA.
2600706	RPRD1A	55197	Homo sapiens regulation of nuclear pre-mRNA domain containing 1A (RPRD1A), mRNA.
6220543	HIF1A	3091	Homo sapiens hypoxia-inducible factor 1, alpha subunit (basic helix-loop-helix transcription factor) (HIF1A), transcript variant 1, mRNA.
4900010	HIF1A	3091	Homo sapiens hypoxia-inducible factor 1, alpha subunit (basic helix-loop-helix transcription factor) (HIF1A), transcript variant 1, mRNA.
2710730	PLS3	5358	Homo sapiens plastin 3 (T isoform) (PLS3), mRNA.
7550546	C3orf64	285203	Homo sapiens chromosome 3 open reading frame 64 (C3orf64), mRNA.
2480440	C3orf64	285203	Homo sapiens chromosome 3 open reading frame 64 (C3orf64), mRNA.
290475	CTNNAL1	8727	Homo sapiens catenin (cadherin-associated protein), alpha-like 1 (CTNNAL1), mRNA.
5890279	COL4A2	1284	Homo sapiens collagen, type IV, alpha 2 (COL4A2), mRNA.
3130632	POLR2B	5431	Homo sapiens polymerase (RNA) II (DNA directed) polypeptide B, 140kDa (POLR2B), mRNA.
6110279	NET1	10276	Homo sapiens neuroepithelial cell transforming 1 (NET1), transcript variant 2, mRNA.
5130164	RASA1	5921	Homo sapiens RAS p21 protein activator (GTPase activating protein) 1 (RASA1), transcript variant 1, mRNA.
1010482	TPM1	7168	Homo sapiens tropomyosin 1 (alpha) (TPM1), transcript variant 6, mRNA.
2140653	TPM1	7168	Homo sapiens tropomyosin 1 (alpha) (TPM1), transcript variant 6, mRNA.
510246	POSTN	10631	Homo sapiens periostin, osteoblast specific factor (POSTN), mRNA.
1050747	POSTN	10631	Homo sapiens periostin, osteoblast specific factor (POSTN), mRNA.
730286	TXNRD1	7296	Homo sapiens thioredoxin reductase 1 (TXNRD1), transcript variant 5, mRNA.
1440376	NTM	50863	Homo sapiens neurotrimin (NTM), transcript variant 2, mRNA.
2940730	ADAM9	8754	Homo sapiens ADAM metallopeptidase domain 9 (meltrin gamma) (ADAM9), transcript variant 1, mRNA.
1240379	ALDH1B1	219	Homo sapiens aldehyde dehydrogenase 1 family, member B1 (ALDH1B1), nuclear gene encoding mitochondrial protein, mRNA.
6480577	SR140	23350	Homo sapiens U2-associated SR140 protein (SR140), mRNA.
4490709	FILIP1L	11259	Homo sapiens filamin A interacting protein 1-like (FILIP1L), transcript variant 3, mRNA.
3940044	MARCH4	57574	Homo sapiens membrane-associated ring finger (C3HC4) 4 (MARCH4), mRNA.
3610672	DSP	1832	Homo sapiens desmoplakin (DSP), transcript variant 2, mRNA.
6960019	PAQR3	152559	Homo sapiens progestin and adipoQ receptor family member III (PAQR3), mRNA.
5220433	DHX40	79665	Homo sapiens DEAH (Asp-Glu-Ala-His) box polypeptide 40 (DHX40), mRNA.
6650433	TLN1	7094	Homo sapiens talin 1 (TLN1), mRNA.

## Sheet: DAVID GOs miR unique up
gene list: 171 miR unique genes up
Functional Annotation Clustering
Current Background: Homo sapiens
144/171 genes recognized by DAVID
Statistical test: a modified Fisher Exact P-Value (EASE score)
61 Cluster(s)
Annotation Cluster 1	Enrichment Score: 3.41		Count	P_Value	Benjamini
	GOTERM_MF_FAT	actin binding	12	8.3E-5	2.8E-2
	GOTERM_MF_FAT	cytoskeletal protein binding	14	2.8E-4	4.5E-2
	GOTERM_CC_FAT	actin cytoskeleton	9	2.6E-3	2.0E-1
Annotation Cluster 2	Enrichment Score: 2.04		Count	P_Value	Benjamini
	GOTERM_BP_FAT	nucleoside metabolic process	5	1.9E-3	7.3E-1
	GOTERM_BP_FAT	ribonucleoside metabolic process	4	6.5E-3	7.1E-1
	GOTERM_BP_FAT	purine ribonucleoside metabolic process	3	2.4E-2	7.9E-1
	GOTERM_BP_FAT	purine nucleoside metabolic process	3	2.4E-2	7.9E-1
Annotation Cluster 3	Enrichment Score: 1.97		Count	P_Value	Benjamini
	GOTERM_MF_FAT	nucleotide binding	31	4.4E-3	3.9E-1
	GOTERM_MF_FAT	nucleoside binding	24	6.3E-3	4.1E-1
	GOTERM_MF_FAT	purine nucleotide binding	27	7.0E-3	3.8E-1
	GOTERM_MF_FAT	adenyl nucleotide binding	23	9.8E-3	4.3E-1
	GOTERM_MF_FAT	purine nucleoside binding	23	1.2E-2	4.3E-1
	GOTERM_MF_FAT	purine ribonucleotide binding	25	1.5E-2	4.7E-1
	GOTERM_MF_FAT	ribonucleotide binding	25	1.5E-2	4.7E-1
	GOTERM_MF_FAT	ATP binding	21	1.9E-2	5.1E-1
	GOTERM_MF_FAT	adenyl ribonucleotide binding	21	2.1E-2	5.2E-1
Annotation Cluster 4	Enrichment Score: 1.83		Count	P_Value	Benjamini
	GOTERM_BP_FAT	positive regulation of myeloid cell differentiation	4	2.5E-3	6.8E-1
	GOTERM_BP_FAT	positive regulation of erythrocyte differentiation	3	3.6E-3	7.0E-1
	GOTERM_BP_FAT	positive regulation of developmental process	8	8.3E-3	6.8E-1
	GOTERM_BP_FAT	regulation of erythrocyte differentiation	3	9.5E-3	6.6E-1
	GOTERM_BP_FAT	regulation of myeloid cell differentiation	4	2.0E-2	8.4E-1
	GOTERM_BP_FAT	positive regulation of cell differentiation	6	4.2E-2	8.3E-1
	GOTERM_BP_FAT	regulation of homeostatic process	3	2.4E-1	9.4E-1
Annotation Cluster 5	Enrichment Score: 1.72		Count	P_Value	Benjamini
	GOTERM_BP_FAT	cell motion	12	1.9E-3	9.2E-1
	GOTERM_BP_FAT	localization of cell	9	4.0E-3	6.6E-1
	GOTERM_BP_FAT	cell motility	9	4.0E-3	6.6E-1
	GOTERM_BP_FAT	cell migration	8	8.0E-3	7.4E-1
	GOTERM_BP_FAT	response to hypoxia	5	2.5E-2	7.9E-1
	GOTERM_BP_FAT	response to oxygen levels	5	3.0E-2	7.9E-1
	GOTERM_BP_FAT	blood vessel morphogenesis	6	3.1E-2	7.9E-1
	GOTERM_BP_FAT	blood vessel development	6	5.3E-2	8.4E-1
	GOTERM_BP_FAT	vasculature development	6	5.7E-2	8.4E-1
	GOTERM_BP_FAT	behavior	6	3.5E-1	9.6E-1
Annotation Cluster 6	Enrichment Score: 1.69		Count	P_Value	Benjamini
	GOTERM_CC_FAT	cytoskeleton	24	2.0E-3	2.2E-1
	GOTERM_CC_FAT	cytoskeletal part	16	2.0E-2	5.8E-1
	GOTERM_CC_FAT	intracellular non-membrane-bounded organelle	31	6.5E-2	6.1E-1
	GOTERM_CC_FAT	non-membrane-bounded organelle	31	6.5E-2	6.1E-1
Annotation Cluster 7	Enrichment Score: 1.48		Count	P_Value	Benjamini
	GOTERM_BP_FAT	positive regulation of developmental process	8	8.3E-3	6.8E-1
	GOTERM_BP_FAT	regulation of cell motion	6	2.2E-2	7.9E-1
	GOTERM_BP_FAT	positive regulation of cell motion	3	1.9E-1	9.2E-1
Annotation Cluster 8	Enrichment Score: 1.47		Count	P_Value	Benjamini
	GOTERM_BP_FAT	protein localization	16	6.0E-3	7.4E-1
	GOTERM_BP_FAT	intracellular transport	13	8.1E-3	7.1E-1
	GOTERM_BP_FAT	intracellular protein transport	9	1.2E-2	7.0E-1
	GOTERM_BP_FAT	cellular protein localization	9	2.1E-2	8.3E-1
	GOTERM_BP_FAT	cellular macromolecule localization	9	2.2E-2	8.0E-1
	GOTERM_BP_FAT	protein transport	13	2.4E-2	8.0E-1
	GOTERM_BP_FAT	establishment of protein localization	13	2.5E-2	7.8E-1
	GOTERM_BP_FAT	protein targeting	5	1.0E-1	8.7E-1
	GOTERM_BP_FAT	vesicle-mediated transport	9	1.0E-1	8.7E-1
	GOTERM_BP_FAT	protein localization in organelle	4	1.2E-1	8.8E-1
	GOTERM_BP_FAT	protein import	3	3.0E-1	9.6E-1
Annotation Cluster 9	Enrichment Score: 1.35		Count	P_Value	Benjamini
	GOTERM_CC_FAT	vesicular fraction	7	2.1E-2	5.4E-1
	GOTERM_CC_FAT	membrane fraction	14	2.6E-2	5.6E-1
	GOTERM_CC_FAT	insoluble fraction	14	3.4E-2	6.2E-1
	GOTERM_CC_FAT	microsome	6	5.9E-2	6.4E-1
	GOTERM_CC_FAT	cell fraction	14	1.6E-1	8.0E-1
Annotation Cluster 10	Enrichment Score: 1.29		Count	P_Value	Benjamini
	GOTERM_CC_FAT	external side of plasma membrane	7	4.0E-3	1.8E-1
	GOTERM_CC_FAT	cell surface	8	3.5E-2	5.2E-1
	GOTERM_CC_FAT	intrinsic to plasma membrane	7	9.6E-1	1.0E0
Annotation Cluster 11	Enrichment Score: 1.24		Count	P_Value	Benjamini
	GOTERM_BP_FAT	negative regulation of immune system process	4	3.1E-2	7.9E-1
	GOTERM_BP_FAT	regulation of adaptive immune response based on somatic recombination of immune receptors built from immunoglobulin superfamily domains	3	7.6E-2	8.6E-1
	GOTERM_BP_FAT	regulation of adaptive immune response	3	7.8E-2	8.6E-1
Annotation Cluster 12	Enrichment Score: 1.2		Count	P_Value	Benjamini
	GOTERM_BP_FAT	maintenance of protein location in cell	3	4.5E-2	8.4E-1
	GOTERM_BP_FAT	maintenance of protein location	3	6.0E-2	8.5E-1
	GOTERM_BP_FAT	maintenance of location in cell	3	6.0E-2	8.5E-1
	GOTERM_BP_FAT	maintenance of location	3	9.8E-2	8.6E-1
Annotation Cluster 13	Enrichment Score: 1.07		Count	P_Value	Benjamini
	GOTERM_CC_FAT	external side of plasma membrane	7	4.0E-3	1.8E-1
	GOTERM_BP_FAT	positive regulation of apoptosis	8	6.6E-2	8.5E-1
	GOTERM_BP_FAT	positive regulation of programmed cell death	8	6.8E-2	8.6E-1
	GOTERM_BP_FAT	positive regulation of cell death	8	6.9E-2	8.5E-1
	GOTERM_BP_FAT	regulation of apoptosis	11	1.3E-1	8.8E-1
	GOTERM_BP_FAT	regulation of programmed cell death	11	1.4E-1	8.8E-1
	GOTERM_BP_FAT	regulation of cell death	11	1.4E-1	8.8E-1
	GOTERM_BP_FAT	induction of apoptosis	5	2.7E-1	9.6E-1
	GOTERM_BP_FAT	induction of programmed cell death	5	2.8E-1	9.5E-1
Annotation Cluster 14	Enrichment Score: 1.05		Count	P_Value	Benjamini
	GOTERM_BP_FAT	circulatory system process	5	6.9E-2	8.5E-1
	GOTERM_BP_FAT	blood circulation	5	6.9E-2	8.5E-1
	GOTERM_BP_FAT	regulation of system process	6	1.1E-1	8.7E-1
	GOTERM_BP_FAT	regulation of muscle contraction	3	1.2E-1	8.8E-1
Annotation Cluster 15	Enrichment Score: 0.99		Count	P_Value	Benjamini
	GOTERM_BP_FAT	proteolysis involved in cellular protein catabolic process	10	6.1E-2	8.5E-1
	GOTERM_BP_FAT	cellular protein catabolic process	10	6.2E-2	8.4E-1
	GOTERM_BP_FAT	protein catabolic process	10	7.3E-2	8.6E-1
	GOTERM_BP_FAT	proteolysis	14	9.6E-2	8.8E-1
	GOTERM_BP_FAT	modification-dependent protein catabolic process	9	1.0E-1	8.7E-1
	GOTERM_BP_FAT	modification-dependent macromolecule catabolic process	9	1.0E-1	8.7E-1
	GOTERM_BP_FAT	ubiquitin-dependent protein catabolic process	5	1.4E-1	8.8E-1
	GOTERM_BP_FAT	cellular macromolecule catabolic process	10	1.5E-1	8.8E-1
	GOTERM_BP_FAT	macromolecule catabolic process	10	2.0E-1	9.2E-1
Annotation Cluster 16	Enrichment Score: 0.97		Count	P_Value	Benjamini
	GOTERM_BP_FAT	cell cycle phase	8	5.6E-2	8.4E-1
	GOTERM_BP_FAT	mitotic cell cycle	7	8.7E-2	8.8E-1
	GOTERM_BP_FAT	cell cycle process	9	9.7E-2	8.7E-1
	GOTERM_BP_FAT	cell division	6	9.8E-2	8.6E-1
	GOTERM_BP_FAT	nuclear division	5	1.1E-1	8.7E-1
	GOTERM_BP_FAT	mitosis	5	1.1E-1	8.7E-1
	GOTERM_BP_FAT	M phase of mitotic cell cycle	5	1.2E-1	8.7E-1
	GOTERM_BP_FAT	organelle fission	5	1.2E-1	8.8E-1
	GOTERM_BP_FAT	M phase	6	1.4E-1	8.8E-1
	GOTERM_BP_FAT	cell cycle	10	1.9E-1	9.2E-1
Annotation Cluster 17	Enrichment Score: 0.92		Count	P_Value	Benjamini
	GOTERM_BP_FAT	response to hormone stimulus	8	3.3E-2	7.9E-1
	GOTERM_BP_FAT	response to endogenous stimulus	8	5.1E-2	8.4E-1
	GOTERM_BP_FAT	response to steroid hormone stimulus	5	7.5E-2	8.6E-1
	GOTERM_BP_FAT	response to organic substance	10	1.4E-1	8.8E-1
	GOTERM_BP_FAT	response to corticosteroid stimulus	3	1.6E-1	8.9E-1
	GOTERM_BP_FAT	response to insulin stimulus	3	2.0E-1	9.2E-1
	GOTERM_BP_FAT	response to estrogen stimulus	3	2.2E-1	9.3E-1
	GOTERM_BP_FAT	response to peptide hormone stimulus	3	3.7E-1	9.7E-1
Annotation Cluster 18	Enrichment Score: 0.91		Count	P_Value	Benjamini
	GOTERM_BP_FAT	regulation of cell motion	6	2.2E-2	7.9E-1
	GOTERM_BP_FAT	response to oxidative stress	5	4.7E-2	8.2E-1
	GOTERM_BP_FAT	regulation of locomotion	5	7.5E-2	8.6E-1
	GOTERM_BP_FAT	regulation of cell migration	4	1.6E-1	9.0E-1
	GOTERM_BP_FAT	positive regulation of catalytic activity	7	2.6E-1	9.5E-1
	GOTERM_BP_FAT	positive regulation of multicellular organismal process	4	3.3E-1	9.6E-1
	GOTERM_BP_FAT	positive regulation of molecular function	7	3.6E-1	9.7E-1
Annotation Cluster 19	Enrichment Score: 0.9		Count	P_Value	Benjamini
	GOTERM_BP_FAT	response to calcium ion	3	7.6E-2	8.6E-1
	GOTERM_BP_FAT	response to inorganic substance	5	9.0E-2	8.7E-1
	GOTERM_BP_FAT	response to metal ion	3	2.9E-1	9.6E-1
Annotation Cluster 20	Enrichment Score: 0.89		Count	P_Value	Benjamini
	GOTERM_CC_FAT	basolateral plasma membrane	6	3.4E-2	5.5E-1
	GOTERM_CC_FAT	apicolateral plasma membrane	4	6.2E-2	6.3E-1
	GOTERM_CC_FAT	anchoring junction	5	6.6E-2	5.9E-1
	GOTERM_CC_FAT	adherens junction	4	1.6E-1	8.1E-1
	GOTERM_CC_FAT	apical junction complex	3	2.2E-1	8.5E-1
	GOTERM_CC_FAT	cell-cell junction	4	2.4E-1	8.6E-1
	GOTERM_CC_FAT	cell junction	6	4.9E-1	9.4E-1
Annotation Cluster 21	Enrichment Score: 0.86		Count	P_Value	Benjamini
	GOTERM_MF_FAT	ATPase activity, coupled	6	7.7E-2	8.9E-1
	GOTERM_MF_FAT	helicase activity	4	1.1E-1	9.5E-1
	GOTERM_MF_FAT	ATPase activity	6	1.5E-1	9.5E-1
	GOTERM_MF_FAT	ATP-dependent helicase activity	3	2.0E-1	9.7E-1
	GOTERM_MF_FAT	purine NTP-dependent helicase activity	3	2.0E-1	9.7E-1
Annotation Cluster 22	Enrichment Score: 0.86		Count	P_Value	Benjamini
	GOTERM_BP_FAT	cytoskeleton organization	9	2.8E-2	7.9E-1
	GOTERM_BP_FAT	actin cytoskeleton organization	4	2.9E-1	9.6E-1
	GOTERM_BP_FAT	actin filament-based process	4	3.2E-1	9.6E-1
Annotation Cluster 23	Enrichment Score: 0.85		Count	P_Value	Benjamini
	GOTERM_BP_FAT	extracellular matrix organization	5	1.1E-2	6.8E-1
	GOTERM_BP_FAT	extracellular structure organization	5	4.6E-2	8.3E-1
	GOTERM_CC_FAT	extracellular matrix part	3	2.8E-1	8.8E-1
	GOTERM_CC_FAT	proteinaceous extracellular matrix	5	3.1E-1	8.9E-1
	GOTERM_CC_FAT	extracellular matrix	5	3.6E-1	9.1E-1
	GOTERM_CC_FAT	extracellular region part	10	4.8E-1	9.3E-1
Annotation Cluster 24	Enrichment Score: 0.84		Count	P_Value	Benjamini
	GOTERM_BP_FAT	negative regulation of immune system process	4	3.1E-2	7.9E-1
	GOTERM_BP_FAT	regulation of cellular component size	5	1.9E-1	9.2E-1
	GOTERM_BP_FAT	regulation of cell size	3	5.1E-1	9.9E-1
Annotation Cluster 25	Enrichment Score: 0.84		Count	P_Value	Benjamini
	GOTERM_CC_FAT	basolateral plasma membrane	6	3.4E-2	5.5E-1
	GOTERM_BP_FAT	epithelium development	4	2.9E-1	9.6E-1
	GOTERM_BP_FAT	epithelial cell differentiation	3	3.1E-1	9.6E-1
Annotation Cluster 26	Enrichment Score: 0.78		Count	P_Value	Benjamini
	GOTERM_BP_FAT	muscle organ development	6	3.1E-2	7.9E-1
	GOTERM_CC_FAT	sarcomere	3	2.1E-1	8.6E-1
	GOTERM_CC_FAT	myofibril	3	2.6E-1	8.7E-1
	GOTERM_CC_FAT	contractile fiber part	3	2.6E-1	8.7E-1
	GOTERM_CC_FAT	contractile fiber	3	2.9E-1	8.8E-1
Annotation Cluster 27	Enrichment Score: 0.77		Count	P_Value	Benjamini
	GOTERM_BP_FAT	blood vessel morphogenesis	6	3.1E-2	7.9E-1
	GOTERM_BP_FAT	blood vessel development	6	5.3E-2	8.4E-1
	GOTERM_BP_FAT	vasculature development	6	5.7E-2	8.4E-1
	GOTERM_BP_FAT	angiogenesis	4	1.2E-1	8.8E-1
	GOTERM_BP_FAT	response to wounding	8	1.5E-1	8.9E-1
	GOTERM_BP_FAT	regulation of cell proliferation	9	3.3E-1	9.6E-1
	GOTERM_BP_FAT	inflammatory response	4	5.1E-1	9.9E-1
	GOTERM_BP_FAT	negative regulation of cell proliferation	4	5.8E-1	9.9E-1
	GOTERM_BP_FAT	defense response	5	7.6E-1	1.0E0
Annotation Cluster 28	Enrichment Score: 0.74		Count	P_Value	Benjamini
	GOTERM_BP_FAT	ribonucleotide metabolic process	5	3.4E-2	7.8E-1
	GOTERM_BP_FAT	ribonucleoside triphosphate metabolic process	4	7.5E-2	8.6E-1
	GOTERM_BP_FAT	nucleoside triphosphate metabolic process	4	9.5E-2	8.8E-1
	GOTERM_BP_FAT	purine ribonucleotide metabolic process	4	1.1E-1	8.7E-1
	GOTERM_BP_FAT	ribonucleoside triphosphate biosynthetic process	3	2.0E-1	9.2E-1
	GOTERM_BP_FAT	nucleotide biosynthetic process	4	2.0E-1	9.2E-1
	GOTERM_BP_FAT	purine nucleotide metabolic process	4	2.0E-1	9.2E-1
	GOTERM_BP_FAT	nucleoside triphosphate biosynthetic process	3	2.1E-1	9.2E-1
	GOTERM_BP_FAT	nucleobase, nucleoside, nucleotide and nucleic acid biosynthetic process	4	2.1E-1	9.3E-1
	GOTERM_BP_FAT	nucleobase, nucleoside and nucleotide biosynthetic process	4	2.1E-1	9.3E-1
	GOTERM_BP_FAT	ATP metabolic process	3	2.2E-1	9.3E-1
	GOTERM_BP_FAT	purine ribonucleoside triphosphate metabolic process	3	2.5E-1	9.5E-1
	GOTERM_BP_FAT	purine nucleoside triphosphate metabolic process	3	2.7E-1	9.5E-1
	GOTERM_BP_FAT	ribonucleotide biosynthetic process	3	2.7E-1	9.6E-1
	GOTERM_BP_FAT	purine nucleotide biosynthetic process	3	3.5E-1	9.6E-1
	GOTERM_BP_FAT	nitrogen compound biosynthetic process	4	5.1E-1	9.9E-1
Annotation Cluster 29	Enrichment Score: 0.74		Count	P_Value	Benjamini
	GOTERM_BP_FAT	ubiquitin-dependent protein catabolic process	5	1.4E-1	8.8E-1
	GOTERM_BP_FAT	proteasomal ubiquitin-dependent protein catabolic process	3	2.1E-1	9.2E-1
	GOTERM_BP_FAT	proteasomal protein catabolic process	3	2.1E-1	9.2E-1
Annotation Cluster 30	Enrichment Score: 0.74		Count	P_Value	Benjamini
	GOTERM_BP_FAT	regulation of cellular localization	6	5.5E-2	8.4E-1
	GOTERM_BP_FAT	regulation of protein transport	3	2.4E-1	9.4E-1
	GOTERM_BP_FAT	regulation of establishment of protein localization	3	2.6E-1	9.5E-1
	GOTERM_BP_FAT	regulation of protein localization	3	3.2E-1	9.6E-1
Annotation Cluster 31	Enrichment Score: 0.73		Count	P_Value	Benjamini
	GOTERM_BP_FAT	muscle organ development	6	3.1E-2	7.9E-1
	GOTERM_BP_FAT	striated muscle tissue development	3	2.6E-1	9.5E-1
	GOTERM_BP_FAT	muscle tissue development	3	2.8E-1	9.5E-1
	GOTERM_BP_FAT	heart development	3	5.3E-1	9.9E-1
Annotation Cluster 32	Enrichment Score: 0.68		Count	P_Value	Benjamini
	GOTERM_BP_FAT	protein amino acid dephosphorylation	4	9.8E-2	8.7E-1
	GOTERM_BP_FAT	dephosphorylation	4	1.4E-1	8.8E-1
	GOTERM_MF_FAT	phosphatase activity	4	3.4E-1	9.9E-1
	GOTERM_MF_FAT	phosphoprotein phosphatase activity	3	4.0E-1	9.9E-1
Annotation Cluster 33	Enrichment Score: 0.62		Count	P_Value	Benjamini
	GOTERM_BP_FAT	glycoprotein metabolic process	5	8.7E-2	8.7E-1
	GOTERM_BP_FAT	protein amino acid glycosylation	3	2.9E-1	9.6E-1
	GOTERM_BP_FAT	biopolymer glycosylation	3	2.9E-1	9.6E-1
	GOTERM_BP_FAT	glycosylation	3	2.9E-1	9.6E-1
	GOTERM_BP_FAT	glycoprotein biosynthetic process	3	3.8E-1	9.7E-1
Annotation Cluster 34	Enrichment Score: 0.62		Count	P_Value	Benjamini
	GOTERM_CC_FAT	microtubule cytoskeleton	9	1.1E-1	7.5E-1
	GOTERM_CC_FAT	centrosome	4	3.2E-1	8.9E-1
	GOTERM_CC_FAT	microtubule organizing center	4	3.9E-1	9.0E-1
Annotation Cluster 35	Enrichment Score: 0.61		Count	P_Value	Benjamini
	GOTERM_BP_FAT	transmembrane receptor protein tyrosine kinase signaling pathway	5	1.2E-1	8.7E-1
	GOTERM_BP_FAT	enzyme linked receptor protein signaling pathway	6	1.5E-1	8.9E-1
	GOTERM_BP_FAT	cell surface receptor linked signal transduction	13	8.6E-1	1.0E0
Annotation Cluster 36	Enrichment Score: 0.58		Count	P_Value	Benjamini
	GOTERM_BP_FAT	regulation of actin cytoskeleton organization	3	1.7E-1	9.0E-1
	GOTERM_BP_FAT	regulation of actin filament-based process	3	1.8E-1	9.1E-1
	GOTERM_BP_FAT	regulation of cytoskeleton organization	3	3.1E-1	9.6E-1
	GOTERM_BP_FAT	regulation of organelle organization	3	5.4E-1	9.9E-1
Annotation Cluster 37	Enrichment Score: 0.57		Count	P_Value	Benjamini
	GOTERM_BP_FAT	regulation of catabolic process	4	4.5E-2	8.3E-1
	GOTERM_BP_FAT	response to oxidative stress	5	4.7E-2	8.2E-1
	GOTERM_BP_FAT	regulation of cellular catabolic process	3	9.1E-2	8.7E-1
	GOTERM_BP_FAT	response to reactive oxygen species	3	1.3E-1	8.8E-1
	GOTERM_BP_FAT	MAPKKK cascade	4	2.0E-1	9.2E-1
	GOTERM_BP_FAT	positive regulation of catalytic activity	7	2.6E-1	9.5E-1
	GOTERM_BP_FAT	positive regulation of protein kinase activity	4	2.8E-1	9.5E-1
	GOTERM_BP_FAT	positive regulation of kinase activity	4	3.0E-1	9.6E-1
	GOTERM_BP_FAT	positive regulation of transferase activity	4	3.2E-1	9.6E-1
	GOTERM_BP_FAT	regulation of protein kinase activity	5	3.2E-1	9.6E-1
	GOTERM_BP_FAT	regulation of MAP kinase activity	3	3.3E-1	9.6E-1
	GOTERM_BP_FAT	regulation of kinase activity	5	3.4E-1	9.7E-1
	GOTERM_BP_FAT	behavior	6	3.5E-1	9.6E-1
	GOTERM_BP_FAT	positive regulation of molecular function	7	3.6E-1	9.7E-1
	GOTERM_BP_FAT	protein kinase cascade	5	3.7E-1	9.7E-1
	GOTERM_BP_FAT	regulation of transferase activity	5	3.7E-1	9.7E-1
	GOTERM_BP_FAT	regulation of phosphorylation	5	5.4E-1	9.9E-1
	GOTERM_BP_FAT	regulation of phosphorus metabolic process	5	5.7E-1	9.9E-1
	GOTERM_BP_FAT	regulation of phosphate metabolic process	5	5.7E-1	9.9E-1
	GOTERM_CC_FAT	intrinsic to plasma membrane	7	9.6E-1	1.0E0
Annotation Cluster 38	Enrichment Score: 0.57		Count	P_Value	Benjamini
	GOTERM_BP_FAT	cell adhesion	9	2.2E-1	9.3E-1
	GOTERM_BP_FAT	biological adhesion	9	2.2E-1	9.3E-1
	GOTERM_BP_FAT	cell-cell adhesion	4	4.0E-1	9.8E-1
Annotation Cluster 39	Enrichment Score: 0.53		Count	P_Value	Benjamini
	GOTERM_BP_FAT	RNA splicing, via transesterification reactions	4	1.3E-1	8.8E-1
	GOTERM_BP_FAT	RNA splicing, via transesterification reactions with bulged adenosine as nucleophile	4	1.3E-1	8.8E-1
	GOTERM_BP_FAT	nuclear mRNA splicing, via spliceosome	4	1.3E-1	8.8E-1
	GOTERM_BP_FAT	RNA splicing	4	4.2E-1	9.8E-1
	GOTERM_BP_FAT	mRNA processing	4	5.0E-1	9.9E-1
	GOTERM_BP_FAT	mRNA metabolic process	4	6.0E-1	1.0E0
	GOTERM_BP_FAT	RNA processing	5	6.7E-1	1.0E0
Annotation Cluster 40	Enrichment Score: 0.53		Count	P_Value	Benjamini
	GOTERM_BP_FAT	phosphorus metabolic process	13	1.1E-1	8.7E-1
	GOTERM_BP_FAT	phosphate metabolic process	13	1.1E-1	8.7E-1
	GOTERM_BP_FAT	protein amino acid phosphorylation	8	3.2E-1	9.6E-1
	GOTERM_BP_FAT	phosphorylation	9	3.4E-1	9.7E-1
	GOTERM_BP_FAT	intracellular signaling cascade	13	3.5E-1	9.6E-1
	GOTERM_BP_FAT	protein kinase cascade	5	3.7E-1	9.7E-1
	GOTERM_MF_FAT	protein kinase activity	6	5.7E-1	1.0E0
	GOTERM_MF_FAT	protein serine/threonine kinase activity	4	7.0E-1	1.0E0
Annotation Cluster 41	Enrichment Score: 0.51		Count	P_Value	Benjamini
	GOTERM_BP_FAT	proteolysis	14	9.6E-2	8.8E-1
	GOTERM_MF_FAT	metalloendopeptidase activity	3	2.1E-1	9.8E-1
	GOTERM_MF_FAT	endopeptidase activity	5	3.8E-1	9.9E-1
	GOTERM_MF_FAT	metallopeptidase activity	3	4.5E-1	1.0E0
	GOTERM_MF_FAT	peptidase activity, acting on L-amino acid peptides	6	4.8E-1	1.0E0
	GOTERM_MF_FAT	peptidase activity	6	5.2E-1	1.0E0
Annotation Cluster 42	Enrichment Score: 0.48		Count	P_Value	Benjamini
	GOTERM_MF_FAT	small GTPase regulator activity	5	1.9E-1	9.8E-1
	GOTERM_MF_FAT	GTPase regulator activity	6	2.5E-1	9.8E-1
	GOTERM_MF_FAT	nucleoside-triphosphatase regulator activity	6	2.6E-1	9.9E-1
	GOTERM_MF_FAT	enzyme activator activity	5	3.0E-1	9.9E-1
	GOTERM_MF_FAT	GTPase activator activity	3	5.5E-1	1.0E0
	GOTERM_BP_FAT	regulation of small GTPase mediated signal transduction	3	6.2E-1	1.0E0
Annotation Cluster 43	Enrichment Score: 0.46		Count	P_Value	Benjamini
	GOTERM_BP_FAT	regulation of protein kinase cascade	5	1.5E-1	8.9E-1
	GOTERM_BP_FAT	positive regulation of protein kinase cascade	3	4.0E-1	9.8E-1
	GOTERM_BP_FAT	positive regulation of signal transduction	4	4.4E-1	9.8E-1
	GOTERM_BP_FAT	positive regulation of cell communication	4	5.2E-1	9.9E-1
Annotation Cluster 44	Enrichment Score: 0.46		Count	P_Value	Benjamini
	GOTERM_BP_FAT	positive regulation of myeloid cell differentiation	4	2.5E-3	6.8E-1
	GOTERM_BP_FAT	regulation of myeloid cell differentiation	4	2.0E-2	8.4E-1
	GOTERM_BP_FAT	transcription from RNA polymerase II promoter	5	1.3E-1	8.8E-1
	GOTERM_BP_FAT	positive regulation of transcription from RNA polymerase II promoter	6	1.9E-1	9.2E-1
	GOTERM_BP_FAT	positive regulation of transcription, DNA-dependent	7	2.0E-1	9.2E-1
	GOTERM_BP_FAT	positive regulation of RNA metabolic process	7	2.1E-1	9.2E-1
	GOTERM_BP_FAT	transcription, DNA-dependent	5	2.2E-1	9.3E-1
	GOTERM_BP_FAT	RNA biosynthetic process	5	2.3E-1	9.3E-1
	GOTERM_BP_FAT	regulation of gene-specific transcription	3	3.0E-1	9.6E-1
	GOTERM_BP_FAT	positive regulation of transcription	7	3.2E-1	9.6E-1
	GOTERM_BP_FAT	positive regulation of gene expression	7	3.5E-1	9.6E-1
	GOTERM_BP_FAT	regulation of transcription from RNA polymerase II promoter	8	4.0E-1	9.7E-1
	GOTERM_BP_FAT	positive regulation of nucleobase, nucleoside, nucleotide and nucleic acid metabolic process	7	4.1E-1	9.8E-1
	GOTERM_BP_FAT	positive regulation of macromolecule metabolic process	9	4.2E-1	9.8E-1
	GOTERM_BP_FAT	positive regulation of nitrogen compound metabolic process	7	4.4E-1	9.8E-1
	GOTERM_BP_FAT	positive regulation of macromolecule biosynthetic process	7	4.6E-1	9.9E-1
	GOTERM_BP_FAT	positive regulation of cellular biosynthetic process	7	5.0E-1	9.9E-1
	GOTERM_BP_FAT	positive regulation of biosynthetic process	7	5.2E-1	9.9E-1
	GOTERM_MF_FAT	transcription activator activity	4	6.7E-1	1.0E0
	GOTERM_MF_FAT	transcription factor binding	4	8.1E-1	1.0E0
	GOTERM_MF_FAT	sequence-specific DNA binding	4	8.9E-1	1.0E0
	GOTERM_BP_FAT	regulation of RNA metabolic process	12	9.0E-1	1.0E0
	GOTERM_MF_FAT	transcription factor activity	6	9.2E-1	1.0E0
	GOTERM_MF_FAT	DNA binding	15	9.4E-1	1.0E0
	GOTERM_MF_FAT	transcription regulator activity	9	9.4E-1	1.0E0
	GOTERM_BP_FAT	regulation of transcription, DNA-dependent	10	9.7E-1	1.0E0
	GOTERM_BP_FAT	transcription	11	9.9E-1	1.0E0
	GOTERM_BP_FAT	regulation of transcription	11	1.0E0	1.0E0
Annotation Cluster 45	Enrichment Score: 0.44		Count	P_Value	Benjamini
	GOTERM_BP_FAT	sex differentiation	4	1.3E-1	8.8E-1
	GOTERM_BP_FAT	gonad development	3	2.4E-1	9.4E-1
	GOTERM_BP_FAT	reproductive structure development	3	2.8E-1	9.5E-1
	GOTERM_BP_FAT	development of primary sexual characteristics	3	2.8E-1	9.5E-1
	GOTERM_BP_FAT	reproductive developmental process	4	3.7E-1	9.7E-1
	GOTERM_BP_FAT	reproductive cellular process	3	3.9E-1	9.7E-1
	GOTERM_BP_FAT	multicellular organism reproduction	5	5.8E-1	9.9E-1
	GOTERM_BP_FAT	reproductive process in a multicellular organism	5	5.8E-1	9.9E-1
	GOTERM_BP_FAT	sexual reproduction	3	9.0E-1	1.0E0
Annotation Cluster 46	Enrichment Score: 0.41		Count	P_Value	Benjamini
	GOTERM_CC_FAT	cytoplasmic vesicle	8	3.4E-1	9.1E-1
	GOTERM_CC_FAT	cytoplasmic membrane-bounded vesicle	7	3.6E-1	9.1E-1
	GOTERM_CC_FAT	vesicle	8	3.8E-1	9.0E-1
	GOTERM_CC_FAT	membrane-bounded vesicle	7	3.9E-1	9.0E-1
	GOTERM_CC_FAT	secretory granule	3	4.7E-1	9.4E-1
Annotation Cluster 47	Enrichment Score: 0.4		Count	P_Value	Benjamini
	GOTERM_CC_FAT	endomembrane system	11	1.5E-1	8.1E-1
	GOTERM_CC_FAT	endoplasmic reticulum part	5	3.7E-1	9.0E-1
	GOTERM_CC_FAT	endoplasmic reticulum membrane	4	4.3E-1	9.1E-1
	GOTERM_CC_FAT	nuclear envelope-endoplasmic reticulum network	4	4.6E-1	9.3E-1
	GOTERM_CC_FAT	organelle membrane	8	8.6E-1	1.0E0
Annotation Cluster 48	Enrichment Score: 0.37		Count	P_Value	Benjamini
	GOTERM_MF_FAT	ion binding	39	3.2E-1	9.9E-1
	GOTERM_MF_FAT	metal ion binding	38	3.3E-1	9.9E-1
	GOTERM_MF_FAT	cation binding	38	3.6E-1	9.9E-1
	GOTERM_MF_FAT	transition metal ion binding	24	5.5E-1	1.0E0
	GOTERM_MF_FAT	zinc ion binding	19	6.6E-1	1.0E0
Annotation Cluster 49	Enrichment Score: 0.33		Count	P_Value	Benjamini
	GOTERM_MF_FAT	inorganic cation transmembrane transporter activity	4	1.3E-1	9.4E-1
	GOTERM_BP_FAT	transmembrane transport	7	3.3E-1	9.6E-1
	GOTERM_BP_FAT	cation transport	6	4.9E-1	9.9E-1
	GOTERM_MF_FAT	metal ion transmembrane transporter activity	4	5.2E-1	1.0E0
	GOTERM_BP_FAT	monovalent inorganic cation transport	3	7.4E-1	1.0E0
	GOTERM_BP_FAT	metal ion transport	4	7.5E-1	1.0E0
	GOTERM_BP_FAT	ion transport	6	7.7E-1	1.0E0
Annotation Cluster 50	Enrichment Score: 0.31		Count	P_Value	Benjamini
	GOTERM_CC_FAT	nuclear envelope	4	2.7E-1	8.8E-1
	GOTERM_CC_FAT	organelle envelope	6	6.5E-1	9.8E-1
	GOTERM_CC_FAT	envelope	6	6.5E-1	9.7E-1
Annotation Cluster 51	Enrichment Score: 0.31		Count	P_Value	Benjamini
	GOTERM_CC_FAT	nucleoplasm part	8	2.2E-1	8.5E-1
	GOTERM_CC_FAT	nucleoplasm	10	3.8E-1	9.0E-1
	GOTERM_CC_FAT	intracellular organelle lumen	17	5.1E-1	9.5E-1
	GOTERM_CC_FAT	nuclear lumen	14	5.2E-1	9.5E-1
	GOTERM_CC_FAT	organelle lumen	17	5.5E-1	9.5E-1
	GOTERM_CC_FAT	membrane-enclosed lumen	17	5.8E-1	9.6E-1
	GOTERM_MF_FAT	DNA binding	15	9.4E-1	1.0E0
Annotation Cluster 52	Enrichment Score: 0.31		Count	P_Value	Benjamini
	GOTERM_BP_FAT	oxidation reduction	7	4.4E-1	9.8E-1
	GOTERM_MF_FAT	coenzyme binding	3	4.5E-1	1.0E0
	GOTERM_MF_FAT	cofactor binding	3	6.2E-1	1.0E0
Annotation Cluster 53	Enrichment Score: 0.29		Count	P_Value	Benjamini
	GOTERM_BP_FAT	regulation of system process	6	1.1E-1	8.7E-1
	GOTERM_BP_FAT	regulation of membrane potential	3	3.0E-1	9.6E-1
	GOTERM_BP_FAT	regulation of synaptic transmission	3	3.1E-1	9.6E-1
	GOTERM_BP_FAT	regulation of transmission of nerve impulse	3	3.4E-1	9.6E-1
	GOTERM_BP_FAT	regulation of neurological system process	3	3.6E-1	9.7E-1
	GOTERM_BP_FAT	cellular homeostasis	5	5.4E-1	9.9E-1
	GOTERM_BP_FAT	transmission of nerve impulse	4	5.6E-1	9.9E-1
	GOTERM_BP_FAT	homeostatic process	7	5.9E-1	1.0E0
	GOTERM_BP_FAT	chemical homeostasis	5	6.2E-1	1.0E0
	GOTERM_BP_FAT	synaptic transmission	3	7.1E-1	1.0E0
	GOTERM_BP_FAT	cell-cell signaling	5	7.4E-1	1.0E0
	GOTERM_BP_FAT	cellular ion homeostasis	3	8.2E-1	1.0E0
	GOTERM_BP_FAT	cellular chemical homeostasis	3	8.3E-1	1.0E0
	GOTERM_BP_FAT	ion homeostasis	3	8.6E-1	1.0E0
	GOTERM_BP_FAT	neurological system process	7	9.4E-1	1.0E0
Annotation Cluster 54	Enrichment Score: 0.25		Count	P_Value	Benjamini
	GOTERM_BP_FAT	neuron differentiation	5	4.9E-1	9.9E-1
	GOTERM_BP_FAT	neuron development	4	5.4E-1	9.9E-1
	GOTERM_BP_FAT	cell projection organization	4	5.9E-1	1.0E0
	GOTERM_BP_FAT	neuron projection development	3	6.3E-1	1.0E0
Annotation Cluster 55	Enrichment Score: 0.22		Count	P_Value	Benjamini
	GOTERM_MF_FAT	protein dimerization activity	6	4.7E-1	1.0E0
	GOTERM_MF_FAT	protein homodimerization activity	4	5.3E-1	1.0E0
	GOTERM_MF_FAT	identical protein binding	4	9.1E-1	1.0E0
Annotation Cluster 56	Enrichment Score: 0.21		Count	P_Value	Benjamini
	GOTERM_MF_FAT	GTP binding	4	6.0E-1	1.0E0
	GOTERM_MF_FAT	guanyl nucleotide binding	4	6.2E-1	1.0E0
	GOTERM_MF_FAT	guanyl ribonucleotide binding	4	6.2E-1	1.0E0
Annotation Cluster 57	Enrichment Score: 0.2		Count	P_Value	Benjamini
	GOTERM_BP_FAT	membrane invagination	3	5.5E-1	9.9E-1
	GOTERM_BP_FAT	endocytosis	3	5.5E-1	9.9E-1
	GOTERM_BP_FAT	membrane organization	3	8.3E-1	1.0E0
Annotation Cluster 58	Enrichment Score: 0.2		Count	P_Value	Benjamini
	GOTERM_BP_FAT	hemopoiesis	3	5.8E-1	1.0E0
	GOTERM_BP_FAT	hemopoietic or lymphoid organ development	3	6.4E-1	1.0E0
	GOTERM_BP_FAT	immune system development	3	6.7E-1	1.0E0
Annotation Cluster 59	Enrichment Score: 0.19		Count	P_Value	Benjamini
	GOTERM_BP_FAT	apoptosis	6	5.6E-1	9.9E-1
	GOTERM_BP_FAT	programmed cell death	6	5.7E-1	9.9E-1
	GOTERM_BP_FAT	cell death	6	7.2E-1	1.0E0
	GOTERM_BP_FAT	death	6	7.2E-1	1.0E0
Annotation Cluster 60	Enrichment Score: 0.17		Count	P_Value	Benjamini
	GOTERM_BP_FAT	protein complex assembly	5	6.1E-1	1.0E0
	GOTERM_BP_FAT	protein complex biogenesis	5	6.1E-1	1.0E0
	GOTERM_BP_FAT	macromolecular complex assembly	6	6.5E-1	1.0E0
	GOTERM_BP_FAT	macromolecular complex subunit organization	6	7.1E-1	1.0E0
	GOTERM_BP_FAT	cellular macromolecular complex assembly	3	7.4E-1	1.0E0
	GOTERM_BP_FAT	cellular macromolecular complex subunit organization	3	8.0E-1	1.0E0
Annotation Cluster 61	Enrichment Score: 0.04		Count	P_Value	Benjamini
	GOTERM_BP_FAT	negative regulation of transcription, DNA-dependent	3	8.0E-1	1.0E0
	GOTERM_BP_FAT	negative regulation of RNA metabolic process	3	8.1E-1	1.0E0
	GOTERM_BP_FAT	negative regulation of transcription	3	9.0E-1	1.0E0
	GOTERM_BP_FAT	negative regulation of gene expression	3	9.2E-1	1.0E0
	GOTERM_BP_FAT	negative regulation of nucleobase, nucleoside, nucleotide and nucleic acid metabolic process	3	9.3E-1	1.0E0
	GOTERM_BP_FAT	negative regulation of nitrogen compound metabolic process	3	9.3E-1	1.0E0
	GOTERM_BP_FAT	negative regulation of macromolecule biosynthetic process	3	9.4E-1	1.0E0
	GOTERM_BP_FAT	negative regulation of macromolecule metabolic process	4	9.5E-1	1.0E0
	GOTERM_BP_FAT	negative regulation of cellular biosynthetic process	3	9.5E-1	1.0E0
	GOTERM_BP_FAT	negative regulation of biosynthetic process	3	9.5E-1	1.0E0

[truncated: 2 more sheets: miR 206 unique genes down, DAVID GOs miR unique down]
